# Supplementary material for: Transcriptomic and Lipidomic Analysis Reveals Complex Regulation Mechanisms Underlying Rice Roots’ Response to Salt Stress
Source: MDPI journal article supplement (doi:10.3390/metabo14040244), 2024-04-21
Supplement: s1 [file s1]

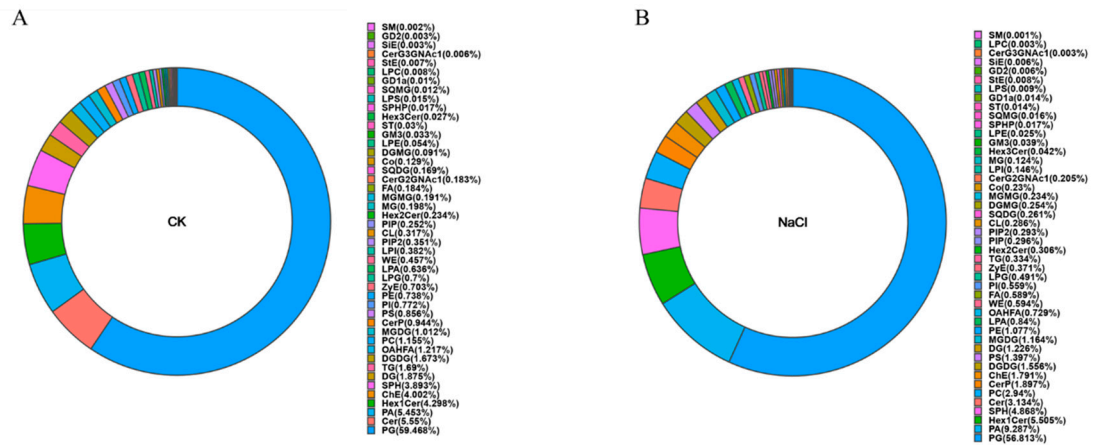

**Figure S1.** Lipid subclass composition analysis of rice root under CK (A) and NaCl (B) treatments . Different lipid subclasses are represented by different colors, and the proportion is represented by the size of the color block area

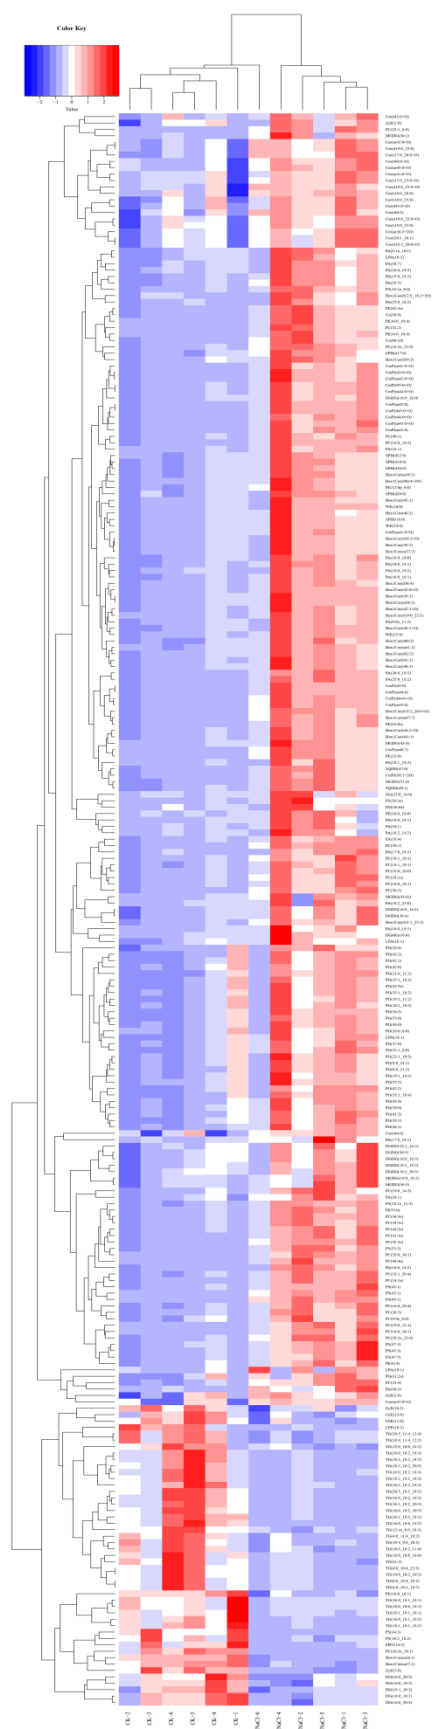

**Figure S2.** Heat map and hierarchical clustering analysis of the differentially accumulated lipid metabolites.
