# Supplementary material for: Transcriptomic and Lipidomic Analysis Reveals Complex Regulation Mechanisms Underlying Rice Roots’ Response to Salt Stress
Source: Metabolites. 2024 Apr 21;14(4):244. doi: 10.3390/metabo14040244 (PMC11052231; doi:10.3390/metabo14040244)
Supplement: Supplementary file 1 [file metabolites-14-00244-s001.zip › Supplementary materials-3.29.xlsx]

## Sheet: Table S1
Table S1. Primers used in this study.
Gene	Forward primer (5'-3')	Reverse primer (5'-3')
OsFbox203	AGGCTTGAAGAGCGGATTTATG	CACCTGTTCAGACGAGCATC
OsNAC032	CTTGTCTGCCACTACCTTCAT	AAGAAGTACCACTCGTTCGTG
HMG-CoA	GCACCGTTGTTCCAATGCTT	GGAAGAGTCCACAACGCTCA
OsPSK2	CACCAAGAGAATGGCGGTGT	TGCTCCCATCAACTCGGAGA
PSK2	GAAGGTCAAGGTGAGCGAGT	TGATGCCATGAACGCACTGT
OsPR2	CCATGTTCGCTCTCGCATTG	AAGAGGCCCCAATTCTGCTC
OsZIP9	TCTCACAGGTGTTTGAGCTG	GGGCTATTCTCATTGTAGGCG
OsSCP40	GGCATCATGATTGGGAACGC	GGTGAAGTTGCAGTGCTTGG
OsbZIP14	CACCTCGACGACCTCACCG	GCTCGGGGGAGGATCTGAA
TIFY10C	ACGAGCTGCCTCTCATCAAG	TGGTCAGCTGTTGAGCCTTC
OsMYB30	TGGCACACTCACCTCAAGAA	ACTGTCCGTGGTGTTGTGAT
OsLAC13	CCAACGACACGTTCAAGCTG	TCATTGCTGGCGTCGTAGTT
OsActin	CTTCATAGGAATGGAAGCTGCGGGTA	CGACCACCTTGATCTTCATGCTGCTA

## Sheet: Table S2
Table S2. Statistical summary of the reads from RNA-seq
	CK-1	CK-2	CK-3	Average	NaCl-1	NaCl-2	NaCl-3	Average
Raw reads	56822414	58865138	56849802	57512451	51947400	57155802	52989370	54030857
Clean reads	56807412	58856706	56840582	57501566	51937860	57137656	52976204	54017240
Q30	0.9417	0.9421	0.9429	0.9422	0.9434	0.943	0.9425	0.943
Clean reads mapped	41845443	40318074	43127174	4.17636e+07	37656681	43986357	39485207	4.03761e+07
Percentage of clean reads mapped	0.7366	0.685	0.7587	0.7268	0.725	0.7698	0.7453	0.7467

## Sheet: Table S3
Table S3. General information of all the identified genes
Gene_id	Count_ CK-1	Count_ CK-2	Count_ CK-3	Count_ NaCl-1	Count_ NaCl-2	Count_ NaCl-3	FPKM_ CK-1	FPKM_ CK-2	FPKM_ CK-3	FPKM_ NaCl-1	FPKM_ NaCl-2	FPKM_ NaCl-3	Symbol	Description
LOC_Os01g01010.MSUv7.0	845	836	901	575	731	639	14.5352	14.8922	15.0502	10.9295	12.0614	11.6938	BAD45492.1	putative GTPase-activating protein [Oryza sativa Japonica Group]|BAE79746.1 putative GTPase-activating protein [Oryza sativa Japonica Group]|EEC69756.1 hypothetical protein OsI_00002 [Oryza sativa Indica Group]|EEE53688.1 hypothetical protein OsJ_00001 [Oryza sativa Japonica Group]
LOC_Os01g01019.MSUv7.0	47	36	43	29	38	39	2.1736	1.72415	1.9311	1.482	1.68571	1.91885	BAS69909.1	Os01g0100300, partial [Oryza sativa Japonica Group]
LOC_Os01g01030.MSUv7.0	321	231	238	254	355	250	6.79	5.0602	4.88874	5.93699	7.20296	5.62599	XP_015619189.1	monocopper oxidase-like protein SKU5 isoform X1 [Oryza sativa Japonica Group]
LOC_Os01g01040.MSUv7.0	1141	962	1162	1032	1200	1141	22.3736	19.5351	22.1265	22.3614	22.571	23.8029	NP_001348255.1	uncharacterized protein LOC112163591 [Oryza sativa Japonica Group]|XP_025882893.1 uncharacterized protein LOC112936026 isoform X1 [Oryza sativa Japonica Group]|XP_025882909.1 uncharacterized protein LOC112936026 isoform X1 [Oryza sativa Japonica Group]|XP_025882917.1 uncharacterized protein LOC112936026 isoform X1 [Oryza sativa Japonica Group]|BAB62620.1 P0402A09.1 [Oryza sativa Japonica Group]|B…
LOC_Os01g01050.MSUv7.0	994	783	895	709	940	796	25.4083	20.7272	22.216	20.0264	23.0481	21.6469	XP_015621157.1	uncharacterized protein LOC4326456 isoform X2 [Oryza sativa Japonica Group]
LOC_Os01g01060.MSUv7.0	1183	1099	1665	1276	1369	1071	67.0197	64.4772	91.5983	79.8797	74.3942	64.5507	3J60_F	Chain F, Localization Of The Small Subunit Ribosomal Proteins Into A 5.5 A Cryo-em Map Of Triticum Aestivum Translating 80s Ribosome
LOC_Os01g01070.MSUv7.0	853	847	865	764	733	632	23.4733	24.1379	23.1152	23.232	19.3485	18.5028	BAB62622.1	P0402A09.3 [Oryza sativa Japonica Group]
LOC_Os01g01080.MSUv7.0	1197	1567	1557	975	1008	1300	30.2413	40.9983	38.1989	27.2194	24.4278	34.9416	BAB62623.1	putative sphingosine-1-phosphate lyase [Oryza sativa Japonica Group]
LOC_Os01g01110.MSUv7.0	6	2	6	6	1	4	0.350977	0.121157	0.340827	0.387835	0.0561107	0.248932	BAB62624.1	P0402A09.7 [Oryza sativa Japonica Group]|BAB64237.1 hypothetical protein [Oryza sativa Japonica Group]|BAB92126.1 P0455C04.1 [Oryza sativa Japonica Group]
LOC_Os01g01115.MSUv7.0	64	70	62	45	58	58	1.37102	1.55293	1.28976	1.06523	1.19182	1.32186	BAB62625.1	P0402A09.8 [Oryza sativa Japonica Group]|BAB92127.1 P0455C04.2 [Oryza sativa Japonica Group]
LOC_Os01g01120.MSUv7.0	193	107	136	99	111	81	8.34095	4.78887	5.70759	4.72783	4.6015	3.72423	BAF03655.1	Os01g0101200, partial [Oryza sativa Japonica Group]|BAS69921.1 Os01g0101200, partial [Oryza sativa Japonica Group]
LOC_Os01g01130.MSUv7.0	242	220	264	145	188	171	6.30024	5.93137	6.67423	4.17136	4.6948	4.73621	XP_015620831.1	snurportin-1 [Oryza sativa Japonica Group]|BAF03656.1 Os01g0101300 [Oryza sativa Japonica Group]|BAS69922.1 Os01g0101300 [Oryza sativa Japonica Group]
LOC_Os01g01150.MSUv7.0	2445	2305	2440	1839	3100	2430	24.3426	23.7657	23.5903	20.232	29.6052	25.7388	BAB62628.1	P0402A09.11 [Oryza sativa Japonica Group]|BAB92130.1 P0455C04.5 [Oryza sativa Japonica Group]
LOC_Os01g01160.MSUv7.0	146	156	204	131	139	144	6.98123	7.72493	9.4725	6.92179	6.37547	7.32547	BAF03658.2	Os01g0101700 [Oryza sativa Japonica Group]
LOC_Os01g01170.MSUv7.0	17	20	21	30	22	23	0.379624	0.462515	0.455386	0.740277	0.471244	0.54642	XP_015645390.1	uncharacterized protein LOC4326464 isoform X2 [Oryza sativa Japonica Group]
LOC_Os01g01180.MSUv7.0	1	0	0	0	0	0	0.237992	0	0	0	0	0	BAB62632.1	P0402A09.15 [Oryza sativa Japonica Group]|BAB92134.1 P0455C04.9 [Oryza sativa Japonica Group]
LOC_Os01g01190.MSUv7.0	34	10	7	40	18	22	0.948146	0.288793	0.189561	1.23261	0.481489	0.652699	XP_015633975.1	non-specific phospholipase C6 [Oryza sativa Japonica Group]
LOC_Os01g01280.MSUv7.0	79	63	68	97	114	103	3.35848	2.77362	2.80724	4.55675	4.64877	4.6585	XP_015631372.1	thylakoid lumenal 17.9 kDa protein, chloroplastic isoform X1 [Oryza sativa Japonica Group]
LOC_Os01g01290.MSUv7.0	4	2	0	1	9	7	0.133985	0.0693772	0	0.0370138	0.289172	0.249452	XP_015622453.1	uncharacterized protein LOC4326467 isoform X3 [Oryza sativa Japonica Group]
LOC_Os01g01295.MSUv7.0	319	340	353	337	249	304	9.27291	10.2352	9.9645	10.8249	6.94293	9.4014	XP_015622454.1	uncharacterized protein LOC4326468 [Oryza sativa Japonica Group]|BAB62638.1 P0402A09.23 [Oryza sativa Japonica Group]|BAB64252.1 unknown protein [Oryza sativa Japonica Group]|BAB92140.1 P0455C04.17 [Oryza sativa Japonica Group]|BAF03663.1 Os01g0102500 [Oryza sativa Japonica Group]|EEC69767.1 hypothetical protein OsI_00023 [Oryza sativa Indica Group]|EEE53698.1 hypothetical protein OsJ_00020 [Oryz…
LOC_Os01g01302.MSUv7.0	152	153	152	74	135	84	6.8591	7.15	6.66074	3.68997	5.84353	4.03271	BAB62639.1	P0402A09.24 [Oryza sativa Japonica Group]|BAB92141.1 P0455C04.18 [Oryza sativa Japonica Group]
LOC_Os01g01307.MSUv7.0	1350	1409	1693	1322	1316	1185	71.8715	77.6828	87.5256	77.7718	67.2043	67.1174	BAF03665.1	Os01g0102700 [Oryza sativa Japonica Group]|BAS69936.1 Os01g0102700 [Oryza sativa Japonica Group]
LOC_Os01g01312.MSUv7.0	713	524	671	540	647	603	8.92237	6.79067	8.15396	7.46711	7.76628	8.02789	BAS69937.1	Os01g0102800, partial [Oryza sativa Japonica Group]
LOC_Os01g01340.MSUv7.0	7934	6844	6723	5579	6758	5287	237.793	212.426	195.67	184.77	194.286	168.581	XP_015617278.1	light-regulated protein, chloroplastic [Oryza sativa Japonica Group]|Q03200.1 RecName: Full=Light-regulated protein, chloroplastic; Flags: Precursor|CAA48706.1 unnamed protein product [Oryza sativa Japonica Group]|BAB16320.1 putative CR9 [Oryza sativa Japonica Group]|BAB92145.1 light-regulated protein [Oryza sativa Japonica Group]|BAD45513.1 putative CR9 [Oryza sativa Japonica Group]|BAF03667.1 O…
LOC_Os01g01350.MSUv7.0	165	139	187	94	176	158	5.46368	4.76658	6.01309	3.43951	5.59025	5.56611	XP_015617267.2	vacuolar protein sorting-associated protein 60.1 [Oryza sativa Japonica Group]|BAB16321.1 putative CGI-34 protein [Oryza sativa Japonica Group]|BAB92146.1 P0455C04.24 [Oryza sativa Japonica Group]|BAD45514.1 putative CGI-34 protein [Oryza sativa Japonica Group]|EAY72177.1 hypothetical protein OsI_00027 [Oryza sativa Indica Group]|EAZ10196.1 hypothetical protein OsJ_00024 [Oryza sativa Japonica Gr…
LOC_Os01g01360.MSUv7.0	280	221	224	123	236	148	5.83046	4.76571	4.52948	2.8302	4.71384	3.27869	XP_015628217.1	protein NRT1/ PTR FAMILY 6.1 [Oryza sativa Japonica Group]|BAB16322.1 putative peptide transport protein [Oryza sativa Japonica Group]|BAB92147.1 putative peptide transporter-like protein [Oryza sativa Japonica Group]|BAF03669.1 Os01g0103100 [Oryza sativa Japonica Group]|EAY72178.1 hypothetical protein OsI_00028 [Oryza sativa Indica Group]|BAG92028.1 unnamed protein product [Oryza sativa Japonica…
LOC_Os01g01369.MSUv7.0	1197	1261	1313	1232	1233	1177	40.3805	44.0538	43.0128	45.9257	39.8986	42.2423	XP_015617405.1	probable 3-beta-hydroxysteroid-Delta(8),Delta(7)-isomerase [Oryza sativa Japonica Group]|Q9FTZ2.1 RecName: Full=Probable 3-beta-hydroxysteroid-Delta(8),Delta(7)-isomerase; AltName: Full=Cholestenol Delta-isomerase; AltName: Full=Delta(8)-Delta(7) sterol isomerase; Short=D8-D7 sterol isomerase|BAB16323.1 putative phenylalkylamine binding protein [Oryza sativa Japonica Group]|BAB92148.1 putative C-…
LOC_Os01g01380.MSUv7.0	101	96	95	119	100	77	1.51181	1.48812	1.38088	1.9683	1.4358	1.2262	BAD44829.1	unknown protein [Oryza sativa Japonica Group]|BAG92010.1 unnamed protein product [Oryza sativa Japonica Group]|BAF03672.2 Os01g0103700 [Oryza sativa Japonica Group]
LOC_Os01g01390.MSUv7.0	298	232	264	213	193	180	6.86944	5.53839	5.90969	5.42566	4.26757	4.4144	XP_015622351.1	uncharacterized protein At1g76660 [Oryza sativa Japonica Group]|XP_015622352.1 uncharacterized protein At1g76660 [Oryza sativa Japonica Group]|XP_015622353.1 uncharacterized protein At1g76660 [Oryza sativa Japonica Group]|BAD44830.1 unknown protein [Oryza sativa Japonica Group]|BAF03673.1 Os01g0103800 [Oryza sativa Japonica Group]|BAG95716.1 unnamed protein product [Oryza sativa Japonica Group]|E…
LOC_Os01g01400.MSUv7.0	29	9	19	30	30	39	0.552645	0.177616	0.351607	0.631739	0.548387	0.790691	EEC69772.1	hypothetical protein OsI_00034 [Oryza sativa Indica Group]
LOC_Os01g01410.MSUv7.0	343	327	347	303	609	413	7.18249	7.09119	7.05611	7.01118	12.2325	9.20078	XP_015617554.1	C-type lectin receptor-like tyrosine-protein kinase At1g52310 isoform X2 [Oryza sativa Japonica Group]|BAD44833.1 putative protein kinase [Oryza sativa Japonica Group]|BAS69951.1 Os01g0104000 [Oryza sativa Japonica Group]
LOC_Os01g01420.MSUv7.0	651	629	750	646	718	757	16.6406	16.6506	18.6168	18.2469	17.6048	20.5863	XP_015617566.1	protein NCA1 isoform X1 [Oryza sativa Japonica Group]
LOC_Os01g01430.MSUv7.0	11	4	3	4	0	18	0.402331	0.15151	0.106553	0.161666	0	0.700417	BAF03677.2	Os01g0104200 [Oryza sativa Japonica Group]
LOC_Os01g01440.MSUv7.0	0	0	0	0	0	1	0	0	0	0	0	0.145537	BAD44836.1	hypothetical protein [Oryza sativa Japonica Group]|BAS69956.1 Os01g0104300 [Oryza sativa Japonica Group]
LOC_Os01g01450.MSUv7.0	1156	1088	2354	816	571	817	36.8282	35.8957	72.8256	28.7264	17.4492	27.691	EAZ10205.1	hypothetical protein OsJ_00036 [Oryza sativa Japonica Group]
LOC_Os01g01470.MSUv7.0	0	0	0	2	0	0	0	0	0	0.0739326	0	0	XP_015621005.1	NAC domain-containing protein 79 [Oryza sativa Japonica Group]|BAB16335.1 putative NAM protein [Oryza sativa Japonica Group]|BAF03679.1 Os01g0104500 [Oryza sativa Japonica Group]|EAZ10206.1 hypothetical protein OsJ_00037 [Oryza sativa Japonica Group]|BAH01242.1 unnamed protein product [Oryza sativa Japonica Group]|ADR66987.1 NAM protein [Oryza sativa Japonica Group]|AFI71276.1 NAM protein [Oryza …
LOC_Os01g01484.MSUv7.0	262	276	303	267	300	261	5.45129	5.947	6.12204	6.13871	5.98738	5.77739	XP_015622107.1	light-mediated development protein DET1 isoform X1 [Oryza sativa Japonica Group]
LOC_Os01g01510.MSUv7.0	874	875	1102	780	953	704	17.9909	18.6527	22.0282	17.7421	18.8171	15.4173	XP_015622160.1	something about silencing protein 10 isoform X1 [Oryza sativa Japonica Group]
LOC_Os01g01520.MSUv7.0	5708	3633	5318	3538	5960	3666	170.488	112.374	154.246	116.771	170.755	116.492	XP_015620995.1	fatty alcohol:caffeoyl-CoA acyltransferase [Oryza sativa Japonica Group]|BAB16338.1 hsr201 -like [Oryza sativa Japonica Group]|BAB16898.1 hsr201 -like [Oryza sativa Japonica Group]|BAF03682.1 Os01g0104900 [Oryza sativa Japonica Group]|BAH00540.1 unnamed protein product [Oryza sativa Japonica Group]|BAS69962.1 Os01g0104900 [Oryza sativa Japonica Group]
LOC_Os01g01570.MSUv7.0	85	70	55	85	77	66	2.2719	1.93758	1.42754	2.51049	1.97415	1.87676	BAS69965.1	Os01g0105450 [Oryza sativa Japonica Group]
LOC_Os01g01580.MSUv7.0	4	1	5	1	1	4	0.301273	0.0779992	0.3657	0.0832276	0.0722466	0.320519	BAD44844.1	hypothetical protein [Oryza sativa Japonica Group]|BAD44874.1 hypothetical protein [Oryza sativa Japonica Group]
LOC_Os01g01590.MSUv7.0	5	4	7	10	5	8	0.768734	0.636879	1.0451	1.69892	0.737384	1.30855	BAD44844.1	hypothetical protein [Oryza sativa Japonica Group]|BAD44874.1 hypothetical protein [Oryza sativa Japonica Group]
LOC_Os01g01600.MSUv7.0	12	24	24	24	22	17	0.367907	0.762007	0.714535	0.813085	0.64699	0.554497	XP_015627200.1	uncharacterized protein LOC4326301 [Oryza sativa Japonica Group]|BAF03685.1 Os01g0105700 [Oryza sativa Japonica Group]|BAS69967.1 Os01g0105700 [Oryza sativa Japonica Group]
LOC_Os01g01610.MSUv7.0	24	26	26	12	32	30	1.49448	1.67666	1.5722	0.825714	1.91138	1.98744	XP_015627212.1	iron-sulfur assembly protein IscA-like 3, mitochondrial [Oryza sativa Japonica Group]|BAD44876.1 IscA -like [Oryza sativa Japonica Group]|BAG90079.1 unnamed protein product [Oryza sativa Japonica Group]|EEE53713.1 hypothetical protein OsJ_00044 [Oryza sativa Japonica Group]|BAH90849.1 Os01g0105800 [Oryza sativa Japonica Group]|BAS69968.1 Os01g0105800 [Oryza sativa Japonica Group]
LOC_Os01g01620.MSUv7.0	640	757	689	801	383	536	20.7314	25.3943	21.6733	28.6715	11.9005	18.4717	XP_015622025.1	uncharacterized protein LOC4326303 [Oryza sativa Japonica Group]|BAD44877.1 carbohydrate kinase -like [Oryza sativa Japonica Group]|BAF03687.1 Os01g0105900 [Oryza sativa Japonica Group]|EAZ10215.1 hypothetical protein OsJ_00045 [Oryza sativa Japonica Group]|BAS69969.1 Os01g0105900 [Oryza sativa Japonica Group]
LOC_Os01g01640.MSUv7.0	586	583	751	625	449	558	29.7684	30.6703	37.047	35.0838	21.8788	30.1569	XP_015621899.1	protein RER1A [Oryza sativa Japonica Group]|BAD44880.1 unknown protein [Oryza sativa Japonica Group]|BAF03688.1 Os01g0106200 [Oryza sativa Japonica Group]|BAG87666.1 unnamed protein product [Oryza sativa Japonica Group]|EEE53716.1 hypothetical protein OsJ_00051 [Oryza sativa Japonica Group]|BAS69970.1 Os01g0106200 [Oryza sativa Japonica Group]
LOC_Os01g01650.MSUv7.0	2	0	0	0	0	0	0.0793909	0	0	0	0	0	XP_015621897.1	isoflavone reductase homolog IRL [Oryza sativa Japonica Group]|BAB16909.1 putative isoflavone reductase [Oryza sativa Japonica Group]|BAF03689.1 Os01g0106300 [Oryza sativa Japonica Group]|EAZ10222.1 hypothetical protein OsJ_00052 [Oryza sativa Japonica Group]|BAG96489.1 unnamed protein product [Oryza sativa Japonica Group]|BAG87857.1 unnamed protein product [Oryza sativa Japonica Group]|BAG93824.…
LOC_Os01g01660.MSUv7.0	7	3	13	9	0	6	0.302271	0.134156	0.545126	0.429446	0	0.275641	XP_015621646.1	isoflavone reductase homolog IRL [Oryza sativa Japonica Group]|BAB16910.1 putative isoflavone reductase [Oryza sativa Japonica Group]|BAF03690.1 Os01g0106400 [Oryza sativa Japonica Group]|EAY72203.1 hypothetical protein OsI_00054 [Oryza sativa Indica Group]|BAG95679.1 unnamed protein product [Oryza sativa Japonica Group]|BAG98680.1 unnamed protein product [Oryza sativa Japonica Group]|BAS69972.1 …
LOC_Os01g01670.MSUv7.0	332	326	350	346	492	308	12.8653	13.0825	13.1706	14.8159	18.288	12.6978	EAY72204.1	hypothetical protein OsI_00055 [Oryza sativa Indica Group]
LOC_Os01g01680.MSUv7.0	140	87	191	103	77	97	7.13277	4.59029	9.44972	5.79876	3.76304	5.25769	EAZ10225.1	hypothetical protein OsJ_00055 [Oryza sativa Japonica Group]
LOC_Os01g01689.MSUv7.0	2261	2075	2354	1969	3511	2978	12.9031	12.2631	13.0453	12.4167	19.2194	18.0805	BAF03692.1	Os01g0106700 [Oryza sativa Japonica Group]
LOC_Os01g01700.MSUv7.0	1197	1285	1494	1157	1184	1121	80.0871	89.0353	97.0676	85.5401	75.9867	79.7935	OAQ83918.1	RING-box protein 1 [Purpureocillium lilacinum]
LOC_Os01g01710.MSUv7.0	1600	1490	1203	479	459	946	37.5303	36.1942	27.402	12.4155	10.3274	23.6073	EMS64636.1	1-deoxy-D-xylulose 5-phosphate reductoisomerase, chloroplastic [Triticum urartu]
LOC_Os01g01720.MSUv7.0	680	761	729	564	527	662	18.5268	21.4717	19.2874	16.98	13.7727	19.1886	BAS69979.1	Os01g0107000 [Oryza sativa Japonica Group]
LOC_Os01g01730.MSUv7.0	1	1	3	2	0	0	0.0909601	0.094198	0.264989	0.201024	0	0	EAY72210.1	hypothetical protein OsI_00061 [Oryza sativa Indica Group]
LOC_Os01g01740.MSUv7.0	270	238	362	162	228	221	6.80486	6.21188	8.8597	4.51168	5.51198	5.92572	XP_015623892.1	serine/threonine-protein kinase HT1 [Oryza sativa Japonica Group]|BAD44848.1 putative protein kinase [Oryza sativa Japonica Group]|BAD44887.1 putative protein kinase [Oryza sativa Japonica Group]|EAY72211.1 hypothetical protein OsI_00062 [Oryza sativa Indica Group]|EAZ10230.1 hypothetical protein OsJ_00060 [Oryza sativa Japonica Group]
LOC_Os01g01760.MSUv7.0	0	0	0	1	0	0	0	0	0	0.0810035	0	0	BAD44850.1	hypothetical protein [Oryza sativa Japonica Group]|BAD44889.1 hypothetical protein [Oryza sativa Japonica Group]
LOC_Os01g01770.MSUv7.0	0	0	0	0	1	0	0	0	0	0	0.0497459	0	EEE53722.1	hypothetical protein OsJ_00063 [Oryza sativa Japonica Group]
LOC_Os01g01780.MSUv7.0	75	32	56	68	52	41	1.87573	0.828798	1.36004	1.87925	1.24747	1.0909	XP_015630333.1	probable glycosyltransferase At3g07620 isoform X2 [Oryza sativa Japonica Group]|BAD44851.1 pectin-glucuronyltransferase -like [Oryza sativa Japonica Group]|BAD44890.1 pectin-glucuronyltransferase -like [Oryza sativa Japonica Group]|BAF03698.1 Os01g0107700 [Oryza sativa Japonica Group]|BAG91731.1 unnamed protein product [Oryza sativa Japonica Group]|EEE53723.1 hypothetical protein OsJ_00064 [Oryza…
LOC_Os01g01790.MSUv7.0	1451	1358	1442	1320	1498	1396	29.2219	28.3225	28.2008	29.3754	28.9382	29.9103	XP_015647632.1	protein EXECUTER 2, chloroplastic [Oryza sativa Japonica Group]|Q657X6.1 RecName: Full=Protein EXECUTER 2, chloroplastic; Short=OsEX2; Flags: Precursor|BAD44852.1 unknown protein [Oryza sativa Japonica Group]|BAD44891.1 unknown protein [Oryza sativa Japonica Group]|EAZ10235.1 hypothetical protein OsJ_00066 [Oryza sativa Japonica Group]|BAG91905.1 unnamed protein product [Oryza sativa Japonica Gro…
LOC_Os01g01800.MSUv7.0	723	649	672	541	601	675	12.0162	11.1703	10.8456	9.93562	9.58125	11.9351	XP_015647740.1	uncharacterized protein LOC4326160 isoform X10 [Oryza sativa Japonica Group]|BAD44853.1 unknown protein [Oryza sativa Japonica Group]|BAD44892.1 unknown protein [Oryza sativa Japonica Group]|BAF03700.1 Os01g0108000 [Oryza sativa Japonica Group]|BAS69986.1 Os01g0108000 [Oryza sativa Japonica Group]
LOC_Os01g01830.MSUv7.0	2009	1882	1984	1477	1873	1630	31.9821	31.0268	30.6707	25.9822	28.6011	27.6063	EEE53725.1	hypothetical protein OsJ_00069 [Oryza sativa Japonica Group]
LOC_Os01g01870.MSUv7.0	156	279	356	57	38	308	6.03619	11.1798	13.3765	2.43714	1.41039	12.6789	EAZ10240.1	hypothetical protein OsJ_00072 [Oryza sativa Japonica Group]
LOC_Os01g01890.MSUv7.0	37	30	25	34	9	38	0.812319	0.682083	0.532992	0.824844	0.189533	0.887569	EAZ10241.1	hypothetical protein OsJ_00073 [Oryza sativa Japonica Group]|EEC69793.1 hypothetical protein OsI_00081 [Oryza sativa Indica Group]
LOC_Os01g01910.MSUv7.0	168	161	146	70	119	133	11.446	11.3595	9.65945	5.27	7.77695	9.64028	BAS69994.1	Os01g0109000, partial [Oryza sativa Japonica Group]
LOC_Os01g01920.MSUv7.0	216	312	251	146	220	197	4.84421	7.24628	5.46636	3.61818	4.73271	4.70034	XP_015621836.1	deoxynucleoside triphosphate triphosphohydrolase SAMHD1 homolog isoform X1 [Oryza sativa Japonica Group]
LOC_Os01g01930.MSUv7.0	4	0	4	5	19	5	0.287163	0	0.278859	0.39665	1.3084	0.381885	BAD44862.1	hypothetical protein [Oryza sativa Japonica Group]|EAY72229.1 hypothetical protein OsI_00083 [Oryza sativa Indica Group]|BAS69998.1 Os01g0109200 [Oryza sativa Japonica Group]
LOC_Os01g01940.MSUv7.0	8	3	2	10	10	4	0.335447	0.130271	0.0814366	0.463343	0.40221	0.178438	XP_015633656.1	uncharacterized protein LOC4326132 isoform X2 [Oryza sativa Japonica Group]|XP_015633667.1 uncharacterized protein LOC4326132 isoform X2 [Oryza sativa Japonica Group]|BAD44863.1 unknown protein [Oryza sativa Japonica Group]|EAY72230.1 hypothetical protein OsI_00084 [Oryza sativa Indica Group]|EAZ10244.1 hypothetical protein OsJ_00076 [Oryza sativa Japonica Group]|BAG86758.1 unnamed protein produc…
LOC_Os01g01960.MSUv7.0	5105	4618	4765	3816	5191	4905	58.2217	54.5424	52.7725	48.0912	56.7882	59.5144	BAF03709.1	Os01g0109700, partial [Oryza sativa Japonica Group]|BAS70002.1 Os01g0109700, partial [Oryza sativa Japonica Group]
LOC_Os01g01970.MSUv7.0	259	290	263	227	156	149	11.2399	13.0332	11.0834	10.8857	6.49389	6.87927	XP_015626025.1	uncharacterized protein LOC9266108 [Oryza sativa Japonica Group]|XP_015626035.1 uncharacterized protein LOC9266108 [Oryza sativa Japonica Group]|BAH90857.1 Os01g0109750 [Oryza sativa Japonica Group]|BAS70003.1 Os01g0109750 [Oryza sativa Japonica Group]
LOC_Os01g01980.MSUv7.0	1	0	0	0	0	0	0.081184	0	0	0	0	0	EAY72234.1	hypothetical protein OsI_00088 [Oryza sativa Indica Group]
LOC_Os01g02000.MSUv7.0	615	456	666	294	380	463	11.5843	8.89513	12.1822	6.11944	6.86591	9.27836	XP_015623371.1	phosphate transporter PHO1-1 isoform X1 [Oryza sativa Japonica Group]|Q657S5.2 RecName: Full=Phosphate transporter PHO1-1; AltName: Full=Protein PHO1-1; Short=OsPHO1;1|BAS70005.1 Os01g0110100 [Oryza sativa Japonica Group]
LOC_Os01g02010.MSUv7.0	142	140	246	77	8	60	5.25644	5.36688	8.84287	3.14965	0.284061	2.36291	BAG98835.1	unnamed protein product [Oryza sativa Japonica Group]
LOC_Os01g02020.MSUv7.0	1513	1823	1883	1944	2025	2414	34.0051	42.4309	41.097	48.2802	43.6564	57.7213	XP_015621311.1	acetyl-CoA acetyltransferase, cytosolic 1 [Oryza sativa Japonica Group]|BAB39872.1 putative acetoacetyl-coenzyme A thiolase [Oryza sativa Japonica Group]|BAF03711.1 Os01g0110400 [Oryza sativa Japonica Group]|BAG95946.1 unnamed protein product [Oryza sativa Japonica Group]|EEE53732.1 hypothetical protein OsJ_00082 [Oryza sativa Japonica Group]|BAS70008.1 Os01g0110400 [Oryza sativa Japonica Group]
LOC_Os01g02040.MSUv7.0	265	224	297	210	162	221	4.23546	3.70761	4.60964	3.70887	2.48364	3.75786	XP_015621312.1	proline-rich receptor-like protein kinase PERK8 [Oryza sativa Japonica Group]|BAB39873.1 putative LRR receptor-like protein kinase [Oryza sativa Japonica Group]|BAF03712.1 Os01g0110500 [Oryza sativa Japonica Group]|BAG94912.1 unnamed protein product [Oryza sativa Japonica Group]|EEE53733.1 hypothetical protein OsJ_00083 [Oryza sativa Japonica Group]|BAS70009.1 Os01g0110500 [Oryza sativa Japonica …
LOC_Os01g02050.MSUv7.0	1	0	0	0	0	0	0.0149256	0	0	0	0	0	BAS70012.1	Os01g0110700, partial [Oryza sativa Japonica Group]
LOC_Os01g02060.MSUv7.0	12	3	9	7	4	0	0.299541	0.077551	0.218159	0.193082	0.0957752	0	XP_015634733.1	piriformospora indica-insensitive protein 2 isoform X1 [Oryza sativa Japonica Group]
LOC_Os01g02080.MSUv7.0	9	12	17	11	11	6	0.380131	0.524883	0.69726	0.513394	0.445657	0.26961	XP_015634132.1	peptidyl-prolyl cis-trans isomerase CYP26-2, chloroplastic [Oryza sativa Japonica Group]
LOC_Os01g02090.MSUv7.0	1194	1243	1224	1069	1086	1226	25.3592	27.3396	25.2446	25.0886	22.1248	27.7023	XP_015621201.1	protein decapping 5 [Oryza sativa Japonica Group]|BAD44943.1 unknown protein [Oryza sativa Japonica Group]|BAF03716.1 Os01g0111200 [Oryza sativa Japonica Group]|BAS70017.1 Os01g0111200 [Oryza sativa Japonica Group]
LOC_Os01g02100.MSUv7.0	414	421	406	701	1054	728	8.08761	8.51712	7.70196	15.1323	19.7505	15.1302	BAF03718.1	Os01g0111400 [Oryza sativa Japonica Group]|BAG89976.1 unnamed protein product [Oryza sativa Japonica Group]|EEE53738.1 hypothetical protein OsJ_00091 [Oryza sativa Japonica Group]|BAS70020.1 Os01g0111400 [Oryza sativa Japonica Group]
LOC_Os01g02110.MSUv7.0	0	0	0	1	0	2	0	0	0	0.0390465	0	0.075186	XP_015643698.1	transcription factor bHLH83 [Oryza sativa Japonica Group]|BAF03719.1 Os01g0111500 [Oryza sativa Japonica Group]|BAG98452.1 unnamed protein product [Oryza sativa Japonica Group]|ADX60270.1 bHLH transcription factor, partial [Oryza sativa Japonica Group]|BAS70021.1 Os01g0111500 [Oryza sativa Japonica Group]
LOC_Os01g02120.MSUv7.0	0	1	0	0	0	0	0	0.0511616	0	0	0	0	EAY84662.1	hypothetical protein OsI_06032 [Oryza sativa Indica Group]
LOC_Os01g02130.MSUv7.0	8	40	36	30	25	16	0.441229	2.28468	1.92811	1.82837	1.32261	0.938831	XP_015635410.1	uncharacterized protein LOC4326146 [Oryza sativa Japonica Group]|BAB39887.1 unknown protein [Oryza sativa Japonica Group]|BAB61171.1 unknown protein [Oryza sativa Japonica Group]|BAF03721.1 Os01g0111700 [Oryza sativa Japonica Group]|EAZ10260.1 hypothetical protein OsJ_00094 [Oryza sativa Japonica Group]|BAG98561.1 unnamed protein product [Oryza sativa Japonica Group]|BAS70023.1 Os01g0111700 [Oryz…
LOC_Os01g02139.MSUv7.0	360	304	344	324	329	332	35.6039	31.1358	33.0376	35.4085	31.2111	34.9323	EAY72250.1	hypothetical protein OsI_00103 [Oryza sativa Indica Group]|EAZ10261.1 hypothetical protein OsJ_00095 [Oryza sativa Japonica Group]
LOC_Os01g02150.MSUv7.0	1445	1012	1461	1188	849	812	71.7956	52.0717	70.4913	65.2251	40.4628	42.922	EAZ10262.1	hypothetical protein OsJ_00097 [Oryza sativa Japonica Group]
LOC_Os01g02160.MSUv7.0	13	12	10	21	9	13	0.825289	0.788923	0.616478	1.47316	0.548053	0.87801	EAZ10263.1	hypothetical protein OsJ_00098 [Oryza sativa Japonica Group]
LOC_Os01g02170.MSUv7.0	219	256	264	221	343	288	2.60066	3.14826	3.04438	2.90002	3.90708	3.63853	BAF03725.1	Os01g0112100 [Oryza sativa Japonica Group]|EAZ10264.1 hypothetical protein OsJ_00099 [Oryza sativa Japonica Group]|BAG92041.1 unnamed protein product [Oryza sativa Japonica Group]|BAG94845.1 unnamed protein product [Oryza sativa Japonica Group]|BAS70027.1 Os01g0112100 [Oryza sativa Japonica Group]
LOC_Os01g02180.MSUv7.0	416	470	505	432	493	377	10.1365	11.86	11.9493	11.6318	11.5228	9.77304	BAS70029.1	Os01g0112300 [Oryza sativa Japonica Group]
LOC_Os01g02190.MSUv7.0	21	29	42	30	19	14	1.04739	1.49788	2.0342	1.6534	0.908994	0.742867	XP_015645985.1	aquaporin NIP4-1 [Oryza sativa Japonica Group]|Q9ASI1.1 RecName: Full=Aquaporin NIP4-1; AltName: Full=NOD26-like intrinsic protein 4-1; AltName: Full=OsNIP4;1|BAB39896.1 putative nodulin-26 precursor [Oryza sativa Japonica Group]|BAB61180.1 putative nodulin-26 precursor [Oryza sativa Japonica Group]|BAF03727.1 Os01g0112400 [Oryza sativa Japonica Group]|EEE53743.1 hypothetical protein OsJ_00101 [O…
LOC_Os01g02200.MSUv7.0	2577	2200	2269	2296	2365	2227	83.5804	73.893	71.4627	82.2867	73.5765	76.8429	XP_015621517.1	U-box domain-containing protein 4 [Oryza sativa Japonica Group]|BAB39897.1 putative arm repeat-containing protein [Oryza sativa Japonica Group]|BAB61181.1 putative arm repeat-containing protein [Oryza sativa Japonica Group]|BAS70031.1 Os01g0112500 [Oryza sativa Japonica Group]
LOC_Os01g02270.MSUv7.0	83	63	69	64	110	91	1.23458	0.970449	0.996658	1.05194	1.56947	1.44005	BAS70036.1	Os01g0113000 [Oryza sativa Japonica Group]
LOC_Os01g02280.MSUv7.0	0	1	0	0	1	4	0	0.0100569	0	0	0.0093152	0.0413264	EAZ10268.1	hypothetical protein OsJ_00103 [Oryza sativa Japonica Group]
LOC_Os01g02290.MSUv7.0	61	90	47	70	53	70	1.51325	2.31213	1.13223	1.91887	1.26117	1.84744	AAC27489.1	receptor-like protein kinase [Oryza sativa Indica Group]
LOC_Os01g02300.MSUv7.0	90	94	97	58	59	116	1.90142	2.05662	1.99005	1.35404	1.19566	2.60728	XP_015610927.1	rust resistance kinase Lr10 isoform X1 [Oryza sativa Japonica Group]|BAD45064.1 putative rust resistance kinase Lr10 [Oryza sativa Japonica Group]|BAF03733.1 Os01g0113300 [Oryza sativa Japonica Group]|EAZ10274.1 hypothetical protein OsJ_00109 [Oryza sativa Japonica Group]|BAG99309.1 unnamed protein product [Oryza sativa Japonica Group]|BAS70039.1 Os01g0113300 [Oryza sativa Japonica Group]
LOC_Os01g02310.MSUv7.0	185	200	242	69	118	111	5.11796	5.72988	6.50123	2.10932	3.1313	3.26694	BAD45065.1	putative receptor serine/threonine kinase PR5K [Oryza sativa Japonica Group]|BAD45143.1 putative receptor serine/threonine kinase PR5K [Oryza sativa Japonica Group]|BAS70041.1 Os01g0113350 [Oryza sativa Japonica Group]
LOC_Os01g02320.MSUv7.0	4	6	18	7	2	5	0.0740343	0.115005	0.32352	0.143166	0.0355076	0.0984547	BAS70042.1	Os01g0113400, partial [Oryza sativa Japonica Group]
LOC_Os01g02334.MSUv7.0	237	261	253	203	173	189	19.5451	22.2905	20.2612	18.4992	13.6852	16.5823	BAH90868.1	Os01g0113650 [Oryza sativa Japonica Group]
LOC_Os01g02350.MSUv7.0	501	591	646	280	410	220	9.86855	12.0557	12.3567	6.09455	7.74672	4.61033	AAF78020.1	receptor-like kinase [Oryza sativa Japonica Group]
LOC_Os01g02360.MSUv7.0	77	103	98	58	57	50	1.67289	2.31741	2.06755	1.39242	1.18787	1.15568	XP_015621240.1	rust resistance kinase Lr10 [Oryza sativa Japonica Group]|BAB39435.1 putative rust resistance kinase Lr10 [Oryza sativa Japonica Group]|BAF03738.1 Os01g0113800 [Oryza sativa Japonica Group]|EAZ10283.1 hypothetical protein OsJ_00118 [Oryza sativa Japonica Group]|BAG99372.1 unnamed protein product [Oryza sativa Japonica Group]|BAS70049.1 Os01g0113800 [Oryza sativa Japonica Group]
LOC_Os01g02370.MSUv7.0	6	15	8	4	18	4	0.142665	0.369358	0.184719	0.105098	0.41054	0.101186	EAZ10284.1	hypothetical protein OsJ_00120 [Oryza sativa Japonica Group]
LOC_Os01g02390.MSUv7.0	925	1026	1019	636	906	790	21.3418	24.5148	22.8307	16.2149	20.051	19.3914	XP_015651286.1	rust resistance kinase Lr10 isoform X1 [Oryza sativa Japonica Group]
LOC_Os01g02400.MSUv7.0	224	282	314	131	197	108	3.41972	4.45843	4.65508	2.20994	2.88487	1.75412	BAF03742.2	Os01g0114300, partial [Oryza sativa Japonica Group]
LOC_Os01g02410.MSUv7.0	0	3	0	0	0	0	0	0.0758082	0	0	0	0	AAF78017.1	receptor-like kinase [Oryza sativa Japonica Group]
LOC_Os01g02420.MSUv7.0	52	50	74	73	31	35	1.55493	1.54835	2.1488	2.41212	0.889176	1.11345	AAF78016.1	receptor-like kinase [Oryza sativa Japonica Group]
LOC_Os01g02430.MSUv7.0	344	287	359	268	289	222	8.55815	7.39425	8.67304	7.36757	6.89664	5.87582	BAS70062.1	Os01g0114600 [Oryza sativa Japonica Group]
LOC_Os01g02440.MSUv7.0	47	31	27	17	27	21	1.45293	0.992431	0.810526	0.580718	0.800626	0.690655	AAF78044.1	receptor-like kinase [Oryza sativa Japonica Group]
LOC_Os01g02460.MSUv7.0	8	4	1	4	6	3	0.455695	0.235958	0.0553146	0.251775	0.327834	0.181802	BAF03748.1	Os01g0114900 [Oryza sativa Japonica Group]|BAS70065.1 Os01g0114900 [Oryza sativa Japonica Group]
LOC_Os01g02470.MSUv7.0	51	73	74	57	50	36	5.4694	8.10743	7.70649	6.7548	5.14348	4.10739	EAZ10289.1	hypothetical protein OsJ_00125 [Oryza sativa Japonica Group]
LOC_Os01g02490.MSUv7.0	18	35	42	13	34	27	0.633038	1.27472	1.43437	0.505206	1.14698	1.01022	EEE53754.1	hypothetical protein OsJ_00126 [Oryza sativa Japonica Group]|BAS70066.1 Os01g0115100 [Oryza sativa Japonica Group]
LOC_Os01g02500.MSUv7.0	73	90	98	30	42	45	6.18662	7.89885	8.06514	2.80944	3.41427	4.0573	EEE53755.1	hypothetical protein OsJ_00127 [Oryza sativa Japonica Group]
LOC_Os01g02560.MSUv7.0	15	24	46	20	27	25	0.3797	0.629146	1.13074	0.559432	0.655588	0.67326	XP_015623429.1	rust resistance kinase Lr10 [Oryza sativa Japonica Group]|BAB17126.1 putative receptor serine/threonine kinase PR5K [Oryza sativa Japonica Group]|BAB39451.1 putative receptor serine/threonine kinase PR5K [Oryza sativa Japonica Group]|BAF03750.1 Os01g0115600 [Oryza sativa Japonica Group]|BAS70071.1 Os01g0115600 [Oryza sativa Japonica Group]
LOC_Os01g02570.MSUv7.0	36	28	36	13	29	35	0.929334	0.748545	0.902458	0.370835	0.718101	0.961238	XP_015616698.1	rust resistance kinase Lr10 [Oryza sativa Japonica Group]|BAB17127.1 putative rust resistance kinase Lr10 [Oryza sativa Japonica Group]|EAZ10295.1 hypothetical protein OsJ_00130 [Oryza sativa Japonica Group]
LOC_Os01g02600.MSUv7.0	5	3	10	0	4	7	0.144537	0.0898094	0.280715	0	0.110914	0.215279	EEE53757.1	hypothetical protein OsJ_00133 [Oryza sativa Japonica Group]
LOC_Os01g02690.MSUv7.0	27	14	26	12	16	14	0.730656	0.392345	0.683248	0.358838	0.415324	0.403061	XP_015646885.1	rust resistance kinase Lr10 [Oryza sativa Japonica Group]
LOC_Os01g02700.MSUv7.0	23	14	24	0	6	0	0.507735	0.320058	0.514489	0	0.127051	0	XP_015646876.1	rust resistance kinase Lr10 isoform X2 [Oryza sativa Japonica Group]
LOC_Os01g02710.MSUv7.0	0	1	0	0	0	0	0	0.0895115	0	0	0	0	XP_015699253.1	PREDICTED: LOW QUALITY PROTEIN: probable receptor-like protein kinase At1g67000 [Oryza brachyantha]
LOC_Os01g02720.MSUv7.0	1611	1469	1485	1308	1769	1382	32.2201	30.4259	28.8412	28.9073	33.9373	29.4058	XP_015646840.1	HBS1-like protein isoform X1 [Oryza sativa Japonica Group]
LOC_Os01g02730.MSUv7.0	575	660	584	266	373	314	15.958	18.969	15.739	8.15755	9.92972	9.27114	BAD52512.1	putative rust resistance kinase Lr10 [Oryza sativa Japonica Group]
LOC_Os01g02750.MSUv7.0	655	654	848	347	347	360	24.5602	25.3956	30.8775	14.3777	12.4807	14.3611	BAF03760.1	Os01g0116900 [Oryza sativa Japonica Group]|EAZ10312.1 hypothetical protein OsJ_00148 [Oryza sativa Japonica Group]
LOC_Os01g02760.MSUv7.0	173	235	245	123	106	142	4.21542	5.92998	5.79717	3.31183	2.47753	3.68109	XP_025878155.1	rust resistance kinase Lr10 [Oryza sativa Japonica Group]
LOC_Os01g02770.MSUv7.0	3	5	1	7	12	3	0.0784942	0.135481	0.0254081	0.202387	0.301173	0.0835086	BAD52513.1	putative rust resistance kinase Lr10 [Oryza sativa Japonica Group]|BAF03762.1 Os01g0117100 [Oryza sativa Japonica Group]|EAZ10314.1 hypothetical protein OsJ_00150 [Oryza sativa Japonica Group]
LOC_Os01g02800.MSUv7.0	7	9	7	13	2	12	0.160936	0.214283	0.156281	0.330267	0.0441064	0.293514	XP_015643227.1	rust resistance kinase Lr10 [Oryza sativa Japonica Group]|BAD52488.1 putative rust resistance kinase Lr10 [Oryza sativa Japonica Group]|BAD52515.1 putative rust resistance kinase Lr10 [Oryza sativa Japonica Group]|BAF03765.2 Os01g0117400 [Oryza sativa Japonica Group]
LOC_Os01g02810.MSUv7.0	22	23	19	12	9	8	0.59535	0.644567	0.499296	0.358838	0.23362	0.230321	BAF03766.1	Os01g0117500 [Oryza sativa Japonica Group]|EAZ10316.1 hypothetical protein OsJ_00152 [Oryza sativa Japonica Group]
LOC_Os01g02840.MSUv7.0	67	55	106	42	43	43	1.82734	1.55345	2.80741	1.26579	1.12495	1.24769	BAB17348.1	putative rust resistance kinase Lr10 [Oryza sativa Japonica Group]|BAB55470.1 putative rust resistance kinase Lr10 [Oryza sativa Japonica Group]|BAF03768.1 Os01g0117700 [Oryza sativa Japonica Group]
LOC_Os01g02850.MSUv7.0	0	0	0	0	0	3	0	0	0	0	0	0.956029	LOC_Os01g02850.MSUv7.0	-
LOC_Os01g02860.MSUv7.0	217	209	231	142	269	182	3.71797	3.70837	3.84338	2.68845	4.42096	3.3175	BAB17349.1	hypothetical protein [Oryza sativa Japonica Group]|BAB55471.1 hypothetical protein [Oryza sativa Japonica Group]
LOC_Os01g02870.MSUv7.0	160	182	160	137	192	146	5.54839	6.53595	5.38793	5.24971	6.38654	5.38633	EAY72293.1	hypothetical protein OsI_00148 [Oryza sativa Indica Group]
LOC_Os01g02880.MSUv7.0	1058	1297	1576	904	776	984	36.0177	45.7258	52.1005	34.0069	25.3402	35.6385	AQK89980.1	Fructose-bisphosphate aldolase [Zea mays]
LOC_Os01g02884.MSUv7.0	1499	1466	1597	1226	1372	1282	27.4423	27.7935	28.3909	24.8014	24.093	24.9689	BAS70109.1	Os01g0118100, partial [Oryza sativa Japonica Group]
LOC_Os01g02890.MSUv7.0	85	79	59	101	99	70	1.51824	1.4613	1.02336	1.99347	1.69619	1.33018	ONM30493.1	CDP-diacylglycerol--serine O-phosphatidyltransferase 1 [Zea mays]|ONM30500.1 CDP-diacylglycerol--serine O-phosphatidyltransferase 1 [Zea mays]
LOC_Os01g02900.MSUv7.0	88	46	129	79	41	37	2.17373	1.17672	3.09434	2.15634	0.97146	0.972341	BAD52572.1	putative HGA6 [Oryza sativa Japonica Group]|BAD52493.1 putative HGA6 [Oryza sativa Japonica Group]
LOC_Os01g02910.MSUv7.0	62	35	71	57	28	24	1.47219	0.860657	1.63714	1.49559	0.637745	0.606284	BAD52573.1	putative HGA6 [Oryza sativa Japonica Group]|BAD52494.1 putative HGA6 [Oryza sativa Japonica Group]
LOC_Os01g02920.MSUv7.0	373	438	473	458	381	500	8.49686	10.3327	10.4632	11.5288	8.32516	12.1175	XP_015621863.1	protein O-linked-mannose beta-1,4-N-acetylglucosaminyltransferase 2 [Oryza sativa Japonica Group]|BAB17148.1 putative HGA6 [Oryza sativa Japonica Group]|BAB55485.1 putative HGA6 [Oryza sativa Japonica Group]|BAF03776.1 Os01g0118700 [Oryza sativa Japonica Group]|EAY72299.1 hypothetical protein OsI_00154 [Oryza sativa Indica Group]|EAZ10329.1 hypothetical protein OsJ_00164 [Oryza sativa Japonica Gr…
LOC_Os01g02930.MSUv7.0	55	44	53	83	61	67	1.47006	1.21791	1.37563	2.45142	1.56394	1.9052	EAZ10330.1	hypothetical protein OsJ_00165 [Oryza sativa Japonica Group]
LOC_Os01g02940.MSUv7.0	73	56	92	65	60	65	1.40139	1.11331	1.71506	1.37885	1.10485	1.32753	BAD52574.1	putative HGA6 [Oryza sativa Japonica Group]|BAD52495.1 putative HGA6 [Oryza sativa Japonica Group]
LOC_Os01g02960.MSUv7.0	62	53	50	35	57	44	1.7364	1.53718	1.35983	1.08317	1.53127	1.31101	EAZ10333.1	hypothetical protein OsJ_00169 [Oryza sativa Japonica Group]
LOC_Os01g02980.MSUv7.0	1	1	0	2	0	0	0.0319952	0.0331341	0	0.0707103	0	0	EEC69837.1	hypothetical protein OsI_00162 [Oryza sativa Indica Group]
LOC_Os01g03020.MSUv7.0	412	407	362	452	397	398	6.28431	6.42904	5.36197	7.61846	5.80857	6.45858	BAS70119.1	Os01g0120300, partial [Oryza sativa Japonica Group]
LOC_Os01g03030.MSUv7.0	421	625	582	315	236	404	13.9407	21.4324	18.7145	11.526	7.49602	14.2323	XP_015621238.1	uncharacterized protein LOC4326034 [Oryza sativa Japonica Group]|BAD52448.1 unknown protein [Oryza sativa Japonica Group]|BAD52587.1 unknown protein [Oryza sativa Japonica Group]|BAF03781.1 Os01g0120400 [Oryza sativa Japonica Group]|EAY72312.1 hypothetical protein OsI_00165 [Oryza sativa Indica Group]|BAG96928.1 unnamed protein product [Oryza sativa Japonica Group]|BAG98747.1 unnamed protein prod…
LOC_Os01g03040.MSUv7.0	53	46	36	42	62	34	2.63333	2.36689	1.73695	2.30594	2.95488	1.79723	EAZ10336.1	hypothetical protein OsJ_00172 [Oryza sativa Japonica Group]
LOC_Os01g03050.MSUv7.0	237	266	225	248	159	206	8.26806	9.61009	7.62242	9.56037	5.32072	7.64568	XP_015640957.1	fruit protein pKIWI502 [Oryza sativa Japonica Group]|EEC69840.1 hypothetical protein OsI_00167 [Oryza sativa Indica Group]|EEE53779.1 hypothetical protein OsJ_00173 [Oryza sativa Japonica Group]
LOC_Os01g03060.MSUv7.0	4536	4381	3905	7693	9383	7386	120.437	120.462	100.684	225.709	238.971	208.636	EAY72321.1	hypothetical protein OsI_00176 [Oryza sativa Indica Group]|EEC69841.1 hypothetical protein OsI_00168 [Oryza sativa Indica Group]
LOC_Os01g03070.MSUv7.0	4066	3705	4017	3685	4869	3716	60.3418	56.9417	57.8906	60.4306	69.3121	58.6706	BAS70126.1	Os01g0120800, partial [Oryza sativa Japonica Group]
LOC_Os01g03080.MSUv7.0	23	18	11	38	19	50	1.19757	0.970588	0.556185	2.18637	0.94895	2.76972	XP_015640967.1	uncharacterized protein LOC9268597 [Oryza sativa Japonica Group]|BAD52452.1 unknown protein [Oryza sativa Japonica Group]|EAY72316.1 hypothetical protein OsI_00170 [Oryza sativa Indica Group]|BAH90878.1 Os01g0120900 [Oryza sativa Japonica Group]|BAS70130.1 Os01g0121000 [Oryza sativa Japonica Group]
LOC_Os01g03090.MSUv7.0	601	573	524	542	711	626	21.5731	21.3002	18.2653	21.4984	24.4809	23.906	BAF03787.1	Os01g0121100, partial [Oryza sativa Japonica Group]|BAS70131.1 Os01g0121100, partial [Oryza sativa Japonica Group]
LOC_Os01g03100.MSUv7.0	227	153	272	133	91	75	6.48289	4.52507	7.5434	4.19723	2.49288	2.27876	XP_015640918.1	uncharacterized protein LOC4326041 isoform X1 [Oryza sativa Japonica Group]
LOC_Os01g03110.MSUv7.0	8442	5975	5763	5155	3777	3630	214.007	156.86	141.869	144.404	91.8433	97.9	XP_015640859.1	uncharacterized protein LOC4326042 [Oryza sativa Japonica Group]|BAD52456.1 unknown protein [Oryza sativa Japonica Group]|BAF03789.1 Os01g0121300 [Oryza sativa Japonica Group]|EEC69844.1 hypothetical protein OsI_00173 [Oryza sativa Indica Group]|EEE53782.1 hypothetical protein OsJ_00179 [Oryza sativa Japonica Group]|BAS70134.1 Os01g0121300 [Oryza sativa Japonica Group]
LOC_Os01g03130.MSUv7.0	38	35	26	137	9	139	1.77311	1.69126	1.1781	7.06384	0.402822	6.90019	XP_015640978.1	uncharacterized protein LOC4326043 isoform X1 [Oryza sativa Japonica Group]|EAY72320.1 hypothetical protein OsI_00175 [Oryza sativa Indica Group]
LOC_Os01g03144.MSUv7.0	758	697	606	890	843	1039	11.0232	10.4969	8.55787	14.302	11.7593	16.0748	XP_015640858.1	ABC transporter G family member 7 [Oryza sativa Japonica Group]|BAB40032.1 putative ATP-binding-cassette protein [Oryza sativa Japonica Group]|BAF03792.1 Os01g0121700 [Oryza sativa Japonica Group]|BAG99867.1 unnamed protein product [Oryza sativa Japonica Group]|EEC69845.1 hypothetical protein OsI_00178 [Oryza sativa Indica Group]|EEE53784.1 hypothetical protein OsJ_00183 [Oryza sativa Japonica Gr…
LOC_Os01g03160.MSUv7.0	446	445	470	448	403	429	11.565	11.9498	11.8349	12.8368	10.0238	11.8348	XP_015640861.1	beta-glucuronosyltransferase GlcAT14A [Oryza sativa Japonica Group]|BAB40033.1 putative xylosyltransferase I [Oryza sativa Japonica Group]|BAG93466.1 unnamed protein product [Oryza sativa Japonica Group]|EEC69846.1 hypothetical protein OsI_00179 [Oryza sativa Indica Group]|EEE53785.1 hypothetical protein OsJ_00184 [Oryza sativa Japonica Group]|BAH90879.1 Os01g0121800 [Oryza sativa Japonica Group]…
LOC_Os01g03170.MSUv7.0	0	0	1	0	0	0	0	0	0.0258757	0	0	0	BAD52674.1	hypothetical protein [Oryza sativa Japonica Group]|BAH90880.1 Os01g0121900 [Oryza sativa Japonica Group]
LOC_Os01g03190.MSUv7.0	4	1	0	0	1	0	0.149556	0.0387198	0	0	0.0358642	0	XP_015640867.1	E3 ubiquitin-protein ligase SINA-like 10 [Oryza sativa Japonica Group]|BAB40038.1 unknown protein [Oryza sativa Japonica Group]|BAF03795.1 Os01g0122200 [Oryza sativa Japonica Group]|EAY72327.1 hypothetical protein OsI_00182 [Oryza sativa Indica Group]|EAZ10350.1 hypothetical protein OsJ_00187 [Oryza sativa Japonica Group]|BAG97981.1 unnamed protein product [Oryza sativa Japonica Group]|BAS70145.1…
LOC_Os01g03240.MSUv7.0	2	0	0	0	0	0	0.208064	0	0	0	0	0	ABG66281.1	hypothetical protein LOC_Os10g42202 [Oryza sativa Japonica Group]
LOC_Os01g03270.MSUv7.0	0	0	3	2	0	0	0	0	0.174527	0.132399	0	0	BAF03798.2	Os01g0123500 [Oryza sativa Japonica Group]
LOC_Os01g03290.MSUv7.0	0	0	0	0	6	2	0	0	0	0	0.34126	0.126165	XP_015622136.1	E3 ubiquitin-protein ligase SINA-like 10 [Oryza sativa Japonica Group]|BAS70152.1 Os01g0123700 [Oryza sativa Japonica Group]
LOC_Os01g03310.MSUv7.0	2	1	0	0	10	0	0.114424	0.0592486	0	0	0.548789	0	XP_015622137.1	Bowman-Birk type bran trypsin inhibitor [Oryza sativa Japonica Group]|BAF03799.1 Os01g0123900 [Oryza sativa Japonica Group]|BAG91972.1 unnamed protein product [Oryza sativa Japonica Group]|BAG96657.1 unnamed protein product [Oryza sativa Japonica Group]|BAG96878.1 unnamed protein product [Oryza sativa Japonica Group]|BAS70154.1 Os01g0123900 [Oryza sativa Japonica Group]
LOC_Os01g03320.MSUv7.0	6	5	3	16	13	15	0.326091	0.281415	0.15833	0.960893	0.677717	0.867305	XP_015622138.1	Bowman-Birk type bran trypsin inhibitor [Oryza sativa Japonica Group]|BAD52690.1 putative Bowman Birk trypsin inhibitor [Oryza sativa Japonica Group]|BAD52865.1 putative Bowman Birk trypsin inhibitor [Oryza sativa Japonica Group]|BAF03800.1 Os01g0124000 [Oryza sativa Japonica Group]|BAG89703.1 unnamed protein product [Oryza sativa Japonica Group]|EEC69852.1 hypothetical protein OsI_00195 [Oryza s…
LOC_Os01g03330.MSUv7.0	487	627	304	360	202	360	13.6245	18.1657	8.25889	11.1292	5.42078	10.7149	XP_015613509.1	Bowman-Birk type bran trypsin inhibitor-like [Oryza sativa Japonica Group]|BAF03801.1 Os01g0124100 [Oryza sativa Japonica Group]|BAG88296.1 unnamed protein product [Oryza sativa Japonica Group]|BAS70156.1 Os01g0124100 [Oryza sativa Japonica Group]
LOC_Os01g03340.MSUv7.0	4725	5916	3961	3557	2572	3089	201.859	261.737	164.326	167.918	105.399	140.397	XP_015613520.1	Bowman-Birk type bran trypsin inhibitor [Oryza sativa Japonica Group]|ABP98945.1 Bowman-Birk type proteinase inhibitor A [Oryza sativa Japonica Group]|BAG96423.1 unnamed protein product [Oryza sativa Japonica Group]|BAG90337.1 unnamed protein product [Oryza sativa Japonica Group]|BAG96626.1 unnamed protein product [Oryza sativa Japonica Group]|BAH90882.1 Os01g0124200 [Oryza sativa Japonica Group]…
LOC_Os01g03360.MSUv7.0	437	421	609	574	1743	382	19.4008	19.3558	26.2549	28.159	74.2255	18.0424	XP_015622026.1	Bowman-Birk type bran trypsin inhibitor [Oryza sativa Japonica Group]|Q0JR25.2 RecName: Full=Bowman-Birk type bran trypsin inhibitor; AltName: Full=OSE727A; AltName: Full=Protein RBBI3-3; AltName: Full=RBTI; Flags: Precursor|BAB21173.1 Bowman Birk trypsin inhibitor [Oryza sativa Japonica Group]|BAC78439.1 trypsin inhibitor [Oryza sativa Japonica Group]|BAH90883.1 Os01g0124400 [Oryza sativa Japoni…
LOC_Os01g03380.MSUv7.0	3	10	12	7	5	7	0.198427	0.684968	0.770754	0.511618	0.317225	0.492574	XP_015636274.2	Bowman-Birk type bran trypsin inhibitor [Oryza sativa Japonica Group]|CAB88393.1 putative Bowman Birk trypsin inhibitor [Oryza sativa Indica Group]|EEC69854.1 hypothetical protein OsI_00201 [Oryza sativa Indica Group]|EEE53791.1 hypothetical protein OsJ_00201 [Oryza sativa Japonica Group]|BAS70161.1 Os01g0124600 [Oryza sativa Japonica Group]
LOC_Os01g03390.MSUv7.0	952	766	812	1046	714	1796	49.8177	41.5112	41.2627	60.4848	35.8395	99.9876	CAB88391.1	putative Bowman Birk trypsin inhibitor [Oryza sativa Indica Group]
LOC_Os01g03480.MSUv7.0	78	35	59	47	99	93	14.2645	6.62857	10.4778	9.49788	17.3666	18.0941	BAB21183.1	P0044F08.13 [Oryza sativa Japonica Group]
LOC_Os01g03490.MSUv7.0	250	173	208	254	235	215	5.36436	3.84428	4.33408	6.02254	4.83686	4.90806	EAZ10372.1	hypothetical protein OsJ_00208 [Oryza sativa Japonica Group]
LOC_Os01g03500.MSUv7.0	113	93	108	124	164	88	4.6817	3.99024	4.34514	5.67694	6.51759	3.87883	XP_025878263.1	uncharacterized protein LOC9271781 [Oryza sativa Japonica Group]|XP_025878264.1 uncharacterized protein LOC9271781 [Oryza sativa Japonica Group]|XP_025878266.1 uncharacterized protein LOC9271781 [Oryza sativa Japonica Group]|XP_025878267.1 uncharacterized protein LOC9271781 [Oryza sativa Japonica Group]|XP_025878268.1 uncharacterized protein LOC9271781 [Oryza sativa Japonica Group]|XP_025878270.1…
LOC_Os01g03510.MSUv7.0	737	788	810	869	998	1083	16.6939	18.4844	17.8168	21.7509	21.6839	26.0982	XP_015621882.1	actin-interacting protein 1-2 [Oryza sativa Japonica Group]|BAB21186.1 putative WD40-repeat protein [Oryza sativa Japonica Group]|BAB55540.1 putative 66 kDa stress protein [Oryza sativa Japonica Group]|BAF03807.1 Os01g0125800 [Oryza sativa Japonica Group]|EEC69857.1 hypothetical protein OsI_00212 [Oryza sativa Indica Group]|EEE53793.1 hypothetical protein OsJ_00210 [Oryza sativa Japonica Group]|B…
LOC_Os01g03520.MSUv7.0	1254	1151	1277	903	1136	1188	16.5047	15.6883	16.3214	13.1331	14.3419	16.6349	XP_015620122.1	probable ubiquitin-conjugating enzyme E2 23 isoform X1 [Oryza sativa Japonica Group]|XP_015620132.1 probable ubiquitin-conjugating enzyme E2 23 isoform X1 [Oryza sativa Japonica Group]
LOC_Os01g03530.MSUv7.0	46	72	56	43	9	46	0.955571	1.54892	1.12966	0.987055	0.179335	1.01661	EAZ10376.1	hypothetical protein OsJ_00212 [Oryza sativa Japonica Group]
LOC_Os01g03549.MSUv7.0	30	41	62	11	10	20	0.678648	0.960501	1.36198	0.274969	0.216991	0.481334	EAZ10378.1	hypothetical protein OsJ_00214 [Oryza sativa Japonica Group]
LOC_Os01g03570.MSUv7.0	24	4	32	12	13	22	0.549115	0.0947769	0.71098	0.30339	0.285308	0.535511	XP_015622029.1	protein INVOLVED IN DE NOVO 2 [Oryza sativa Japonica Group]|BAB21190.1 putative transcription factor [Oryza sativa Japonica Group]|EEC69862.1 hypothetical protein OsI_00219 [Oryza sativa Indica Group]|EEE53794.1 hypothetical protein OsJ_00215 [Oryza sativa Japonica Group]
LOC_Os01g03590.MSUv7.0	2	0	0	0	0	0	0.0584962	0	0	0	0	0	AAX95593.1	hypothetical protein [Oryza sativa Japonica Group]|ABF97743.1 transposon protein, putative, CACTA, En/Spm sub-class [Oryza sativa Japonica Group]
LOC_Os01g03620.MSUv7.0	0	7	11	0	0	0	0	0.197919	0.29164	0	0	0	XP_015629398.1	multicopper oxidase LPR1 homolog 4 isoform X1 [Oryza sativa Japonica Group]|BAD52543.1 putative spore coat protein [Oryza sativa Japonica Group]|BAF03813.1 Os01g0126900 [Oryza sativa Japonica Group]|BAG98941.1 unnamed protein product [Oryza sativa Japonica Group]|BAS70179.1 Os01g0126900 [Oryza sativa Japonica Group]
LOC_Os01g03630.MSUv7.0	0	13	27	0	1	10	0	0.343961	0.669876	0	0.0245072	0.271812	Q5ZE00.2	RecName: Full=Multicopper oxidase LPR1 homolog 3; Flags: Precursor
LOC_Os01g03640.MSUv7.0	5	1	11	0	0	2	0.1137	0.0235495	0.242906	0	0	0.0483854	BAD52545.1	putative spore coat protein [Oryza sativa Japonica Group]|BAH90887.1 Os01g0127200 [Oryza sativa Japonica Group]
LOC_Os01g03650.MSUv7.0	389	342	451	328	394	319	11.6588	10.6151	13.1262	10.863	11.3271	10.1716	XP_015621586.1	protein ABCI7, chloroplastic [Oryza sativa Japonica Group]|BAD52546.1 putative SufD [Oryza sativa Japonica Group]|BAF03816.1 Os01g0127300 [Oryza sativa Japonica Group]|BAG91120.1 unnamed protein product [Oryza sativa Japonica Group]|BAS70183.1 Os01g0127300 [Oryza sativa Japonica Group]
LOC_Os01g03660.MSUv7.0	169	171	161	191	160	120	3.95701	4.14636	3.66068	4.94176	3.59351	2.9892	BAS70184.1	Os01g0127400 [Oryza sativa Japonica Group]
LOC_Os01g03670.MSUv7.0	0	1	0	0	0	0	0	0.043319	0	0	0	0	XP_025878287.1	tetraketide alpha-pyrone reductase 2 [Oryza sativa Japonica Group]|BAB18290.1 putative cinnamoyl CoA reductase [Oryza sativa Japonica Group]|BAF03818.1 Os01g0127500 [Oryza sativa Japonica Group]|EAY72372.1 hypothetical protein OsI_00225 [Oryza sativa Indica Group]|BAS70186.1 Os01g0127500 [Oryza sativa Japonica Group]
LOC_Os01g03680.MSUv7.0	132	133	264	273	202	386	6.90749	7.20757	13.4155	15.7862	10.1395	21.4895	XP_015621389.1	Bowman-Birk type bran trypsin inhibitor [Oryza sativa Japonica Group]|BAB18291.1 putative Bowman Birk trypsin inhibitor [Oryza sativa Japonica Group]|BAF03819.1 Os01g0127600 [Oryza sativa Japonica Group]|EAY72373.1 hypothetical protein OsI_00226 [Oryza sativa Indica Group]|EAZ10386.1 hypothetical protein OsJ_00222 [Oryza sativa Japonica Group]|BAG95407.1 unnamed protein product [Oryza sativa Japo…
LOC_Os01g03690.MSUv7.0	385	448	510	386	194	401	6.08437	7.33202	7.82673	6.74078	2.94086	6.74207	EEC69866.1	hypothetical protein OsI_00227 [Oryza sativa Indica Group]
LOC_Os01g03710.MSUv7.0	70	52	70	51	81	158	2.10769	1.62145	2.04674	1.69686	2.33944	5.06127	EAY72377.1	hypothetical protein OsI_00230 [Oryza sativa Indica Group]
LOC_Os01g03720.MSUv7.0	128	82	135	77	117	148	4.19848	2.78539	4.30002	2.79088	3.68117	5.1646	XP_015633684.1	transcription factor MYB62 isoform X1 [Oryza sativa Japonica Group]|BAF03822.1 Os01g0128000 [Oryza sativa Japonica Group]|EEE53799.1 hypothetical protein OsJ_00224 [Oryza sativa Japonica Group]|BAS70191.1 Os01g0128000 [Oryza sativa Japonica Group]
LOC_Os01g03740.MSUv7.0	55	127	56	19	6	10	0.902869	2.15902	0.8927	0.344654	0.0944781	0.174645	XP_015614489.1	endonuclease 2 [Oryza sativa Japonica Group]|BAF03823.1 Os01g0128100 [Oryza sativa Japonica Group]|BAS70192.1 Os01g0128100 [Oryza sativa Japonica Group]
LOC_Os01g03730.MSUv7.0	41	27	47	18	23	144	1.63875	1.11759	1.82424	0.795003	0.881808	6.12328	XP_006645460.2	PREDICTED: endonuclease 2-like isoform X1 [Oryza brachyantha]
LOC_Os01g03750.MSUv7.0	186	164	149	163	84	107	10.8317	9.89048	8.42605	10.4891	4.69224	6.62918	BAF03825.2	Os01g0128300 [Oryza sativa Japonica Group]
LOC_Os01g03760.MSUv7.0	2535	2857	2703	1915	1506	1882	46.3595	54.108	48.0023	38.6988	26.4182	36.6163	XP_015614466.1	transmembrane protein 214-B [Oryza sativa Japonica Group]|BAB03379.1 unknown protein [Oryza sativa Japonica Group]|BAF03826.1 Os01g0128400 [Oryza sativa Japonica Group]|EEC69872.1 hypothetical protein OsI_00236 [Oryza sativa Indica Group]|EEE53802.1 hypothetical protein OsJ_00228 [Oryza sativa Japonica Group]|BAS70196.1 Os01g0128400 [Oryza sativa Japonica Group]
LOC_Os01g03810.MSUv7.0	61	37	50	13	51	44	3.10178	1.94838	2.46892	0.730454	2.48754	2.38028	BAG87990.1	unnamed protein product [Oryza sativa Japonica Group]|BAS70198.1 Os01g0128700 [Oryza sativa Japonica Group]
LOC_Os01g03820.MSUv7.0	1780	1796	1569	952	1840	1712	29.1101	30.4173	24.9174	17.204	28.8642	29.7866	BAF03828.1	Os01g0128800, partial [Oryza sativa Japonica Group]
LOC_Os01g03870.MSUv7.0	400	327	283	370	550	723	8.71574	7.37875	5.98806	8.9087	11.4954	16.7601	XP_015627038.1	uncharacterized protein LOC4325971 [Oryza sativa Japonica Group]|BAB03388.1 unknown protein [Oryza sativa Japonica Group]|BAF03831.1 Os01g0129500 [Oryza sativa Japonica Group]|BAG94068.1 unnamed protein product [Oryza sativa Japonica Group]|BAS70201.1 Os01g0129500 [Oryza sativa Japonica Group]
LOC_Os01g03890.MSUv7.0	142	195	131	268	196	241	7.51377	10.6855	6.73126	15.6701	9.94818	13.5669	BAS70203.1	Os01g0129600, partial [Oryza sativa Japonica Group]
LOC_Os01g03900.MSUv7.0	0	0	0	2	2	6	0	0	0	0.170395	0.147913	0.492157	XP_015645952.1	uncharacterized protein LOC4325973 [Oryza sativa Japonica Group]|BAD52459.1 unknown protein [Oryza sativa Japonica Group]|BAD52484.1 unknown protein [Oryza sativa Japonica Group]|BAG98201.1 unnamed protein product [Oryza sativa Japonica Group]|EEC69876.1 hypothetical protein OsI_00245 [Oryza sativa Indica Group]|EEE53806.1 hypothetical protein OsJ_00238 [Oryza sativa Japonica Group]|BAF03833.2 Os…
LOC_Os01g03914.MSUv7.0	2491	3019	3127	2401	2633	3191	48.0679	60.3302	58.5955	51.1966	48.736	65.5091	XP_015621370.1	metal tolerance protein 7 isoform X1 [Oryza sativa Japonica Group]|Q9LDU0.1 RecName: Full=Metal tolerance protein 7; Short=OsMTP7|BAA99362.1 putative cation diffusion facilitator 9 [Oryza sativa Japonica Group]|BAB03393.1 putative cation diffusion facilitator 9 [Oryza sativa Japonica Group]|BAF03834.1 Os01g0130000 [Oryza sativa Japonica Group]|BAG88147.1 unnamed protein product [Oryza sativa Japo…
LOC_Os01g03940.MSUv7.0	29	57	47	110	16	17	1.32586	2.69877	2.08667	5.55727	0.701679	0.826882	XP_025878324.1	protein NEGATIVE REGULATOR OF RESISTANCE [Oryza sativa Japonica Group]|Q5ZEF1.1 RecName: Full=Protein NEGATIVE REGULATOR OF RESISTANCE; AltName: Full=NPR1-interactor|BAD52461.1 hypothetical protein [Oryza sativa Japonica Group]|BAD52486.1 hypothetical protein [Oryza sativa Japonica Group]|BAS70208.1 Os01g0130200 [Oryza sativa Japonica Group]
LOC_Os01g03950.MSUv7.0	22	26	20	31	24	42	0.329022	0.402686	0.290461	0.51231	0.344296	0.66826	XP_015622373.1	alpha-xylosidase 1 [Oryza sativa Japonica Group]|BAF03836.1 Os01g0130400 [Oryza sativa Japonica Group]|BAG95494.1 unnamed protein product [Oryza sativa Japonica Group]|BAS70209.1 Os01g0130400 [Oryza sativa Japonica Group]
LOC_Os01g03980.MSUv7.0	242	213	105	256	64	96	12.3901	11.2935	5.22038	14.4832	3.14308	5.22905	XP_015631542.1	zinc finger protein ZIC 2 [Oryza sativa Japonica Group]|BAA99370.1 unknown protein [Oryza sativa Japonica Group]|BAF03838.1 Os01g0130900 [Oryza sativa Japonica Group]|EAZ10410.1 hypothetical protein OsJ_00242 [Oryza sativa Japonica Group]|BAG97217.1 unnamed protein product [Oryza sativa Japonica Group]|BAS70213.1 Os01g0130900 [Oryza sativa Japonica Group]
LOC_Os01g03989.MSUv7.0	1	1	1	0	4	5	0.141247	0.146275	0.137162	0	0.541947	0.751351	EAZ10411.1	hypothetical protein OsJ_00243 [Oryza sativa Japonica Group]
LOC_Os01g04010.MSUv7.0	1181	1600	1551	711	622	1012	116.579	163.562	148.675	77.5549	58.8952	106.279	EAY72399.1	hypothetical protein OsI_00252 [Oryza sativa Indica Group]
LOC_Os01g04020.MSUv7.0	8940	8698	11846	10417	9661	9039	218.348	219.999	280.956	281.139	226.335	234.869	XP_015616539.1	ethylene-responsive transcription factor ERF118 [Oryza sativa Japonica Group]|BAA99376.1 unknown protein [Oryza sativa Japonica Group]|AAQ20900.1 AP2 domain-containing protein AP210 [Oryza sativa Japonica Group]|BAF03840.1 Os01g0131600 [Oryza sativa Japonica Group]|ACF60477.1 AP2 domain containing protein [Oryza sativa Japonica Group]|BAG99727.1 unnamed protein product [Oryza sativa Japonica Grou…
LOC_Os01g04030.MSUv7.0	265	291	319	261	269	241	15.0784	17.1472	17.6261	16.4104	14.6818	14.5888	XP_015625366.1	probable signal peptidase complex subunit 3 [Oryza sativa Japonica Group]|BAF03841.1 Os01g0131800 [Oryza sativa Japonica Group]|BAH01607.1 unnamed protein product [Oryza sativa Japonica Group]|EEC69881.1 hypothetical protein OsI_00256 [Oryza sativa Indica Group]|EEE53812.1 hypothetical protein OsJ_00248 [Oryza sativa Japonica Group]|BAS70222.1 Os01g0131800 [Oryza sativa Japonica Group]
LOC_Os01g04040.MSUv7.0	44	52	36	52	37	56	7.4944	9.1723	5.95446	9.78713	6.04511	10.1477	XP_015625378.1	Bowman-Birk type wound-induced proteinase inhibitor WIP1 [Oryza sativa Japonica Group]|BAA99379.1 putative wound-induced protease inhibitor [Oryza sativa Japonica Group]|BAF03842.1 Os01g0131900 [Oryza sativa Japonica Group]|EAY72403.1 hypothetical protein OsI_00257 [Oryza sativa Indica Group]|EAZ10416.1 hypothetical protein OsJ_00249 [Oryza sativa Japonica Group]|BAS70223.1 Os01g0131900 [Oryza sa…
LOC_Os01g04050.MSUv7.0	635	2213	2542	164	255	300	41.1645	148.567	160.022	11.7479	15.8565	20.6902	XP_015622812.1	Bowman-Birk type wound-induced proteinase inhibitor WIP1 [Oryza sativa Japonica Group]|BAA99380.1 putative wound-induced protease inhibitor [Oryza sativa Japonica Group]|BAB64603.1 putative wound-induced protease inhibitor [Oryza sativa Japonica Group]|BAB69446.1 wound induced protein homolog [Oryza sativa]|BAF03843.1 Os01g0132000 [Oryza sativa Japonica Group]|EAY72404.1 hypothetical protein OsI_…
LOC_Os01g04070.MSUv7.0	13	12	9	4	29	5	0.186348	0.178137	0.125279	0.0633592	0.398747	0.076251	BAF03844.1	Os01g0132100 [Oryza sativa Japonica Group]
LOC_Os01g04080.MSUv7.0	0	2	2	1	0	2	0	0.1036	0.0971456	0.0552721	0	0.106429	EAY72406.1	hypothetical protein OsI_00260 [Oryza sativa Indica Group]
LOC_Os01g04100.MSUv7.0	233	259	200	276	159	200	10.053	11.5726	8.37961	13.1588	6.58042	9.18042	EAY72408.1	hypothetical protein OsI_00263 [Oryza sativa Indica Group]|BAF03847.2 Os01g0132500 [Oryza sativa Japonica Group]
LOC_Os01g04110.MSUv7.0	164	162	183	156	210	139	10.3609	10.5988	11.2269	10.8904	12.7259	9.34244	BAT10483.1	Os10g0358150, partial [Oryza sativa Japonica Group]
LOC_Os01g04120.MSUv7.0	1908	1682	2150	1962	1724	2430	55.186	50.3811	60.3872	62.7073	47.8306	74.774	EAY72410.1	hypothetical protein OsI_00265 [Oryza sativa Indica Group]
LOC_Os01g04130.MSUv7.0	113	162	129	105	139	155	13.1758	19.5616	14.6064	13.5287	15.5464	19.2275	XP_015618622.1	chloroplastic group IIB intron splicing facilitator CRS2, chloroplastic [Oryza sativa Japonica Group]|Q5ZCL8.1 RecName: Full=Chloroplastic group IIB intron splicing facilitator CRS2, chloroplastic; AltName: Full=CRS2-like protein; AltName: Full=Chloroplastic RNA splicing factor 2; Flags: Precursor|BAD52792.1 putative peptidyl-tRNA hydrolase [Oryza sativa Japonica Group]|BAF03849.1 Os01g0132800 [O…
LOC_Os01g04140.MSUv7.0	4	1	0	0	0	2	0.0994185	0.0257394	0	0	0	0.0528848	ABA95953.1	transposon protein, putative, CACTA, En/Spm sub-class [Oryza sativa Japonica Group]
LOC_Os01g04160.MSUv7.0	72	52	57	50	80	51	1.21406	0.908031	0.933333	0.931632	1.29394	0.914893	BAS70236.1	Os01g0133100, partial [Oryza sativa Japonica Group]
LOC_Os01g04170.MSUv7.0	13	11	2	17	3	8	0.661036	0.579249	0.0987568	0.95521	0.146326	0.432778	XP_015644247.1	uncharacterized protein LOC4325803 [Oryza sativa Japonica Group]|BAB64613.1 unknown protein [Oryza sativa Japonica Group]|BAF03851.1 Os01g0133200 [Oryza sativa Japonica Group]|EAY72414.1 hypothetical protein OsI_00268 [Oryza sativa Indica Group]|BAG87441.1 unnamed protein product [Oryza sativa Japonica Group]|BAS70237.1 Os01g0133200 [Oryza sativa Japonica Group]
LOC_Os01g04190.MSUv7.0	1266	1188	1161	1173	1170	1318	26.9653	26.2047	24.0137	27.6082	23.9043	29.8663	XP_015621751.1	plastidic glucose transporter 4 isoform X1 [Oryza sativa Japonica Group]|XP_015621752.1 plastidic glucose transporter 4 isoform X1 [Oryza sativa Japonica Group]
LOC_Os01g04200.MSUv7.0	490	492	548	382	634	498	8.86151	9.21441	9.62382	7.63384	10.9981	9.58152	XP_015621802.1	uncharacterized protein LOC4325805 isoform X1 [Oryza sativa Japonica Group]|XP_015621804.1 uncharacterized protein LOC4325805 isoform X1 [Oryza sativa Japonica Group]|BAD52798.1 unknown protein [Oryza sativa Japonica Group]|BAF03853.1 Os01g0133500 [Oryza sativa Japonica Group]|EEE53818.1 hypothetical protein OsJ_00262 [Oryza sativa Japonica Group]|BAS70239.1 Os01g0133500 [Oryza sativa Japonica Gr…
LOC_Os01g04210.MSUv7.0	3	1	7	0	5	6	0.126505	0.0436695	0.286642	0	0.202244	0.269173	XP_015621808.1	uncharacterized protein LOC107277037 [Oryza sativa Japonica Group]|BAS70241.1 Os01g0133600 [Oryza sativa Japonica Group]
LOC_Os01g04220.MSUv7.0	1	0	0	0	0	0	0.0428972	0	0	0	0	0	XP_015636357.1	uncharacterized protein LOC4325806 [Oryza sativa Japonica Group]
LOC_Os01g04230.MSUv7.0	36	39	14	68	36	28	0.787049	0.882988	0.297223	1.64277	0.754953	0.651255	BAD52802.1	putative atypical receptor-like kinase MARK [Oryza sativa Japonica Group]
LOC_Os01g04250.MSUv7.0	54	52	42	25	32	20	0.940986	0.93839	0.710712	0.48139	0.534881	0.370777	EEE53820.1	hypothetical protein OsJ_00267 [Oryza sativa Japonica Group]
LOC_Os01g04260.MSUv7.0	241	231	307	250	215	175	9.74473	9.67287	12.0544	11.1702	8.33891	7.52808	XP_015620900.1	delta(7)-sterol-C5(6)-desaturase [Oryza sativa Japonica Group]|BAD52805.1 putative sterol-C5(6)-desaturase [Oryza sativa Japonica Group]|BAF03858.1 Os01g0134500 [Oryza sativa Japonica Group]|EAY72422.1 hypothetical protein OsI_00277 [Oryza sativa Indica Group]|EAZ10435.1 hypothetical protein OsJ_00268 [Oryza sativa Japonica Group]|BAG99474.1 unnamed protein product [Oryza sativa Japonica Group]|B…
LOC_Os01g04270.MSUv7.0	0	0	0	0	1	0	0	0	0	0	0.208311	0	BAD52806.1	hypothetical protein [Oryza sativa Japonica Group]
LOC_Os01g04280.MSUv7.0	194	253	193	1075	158	380	5.17732	6.99221	5.00168	31.7015	4.04463	10.789	EAY72424.1	hypothetical protein OsI_00278 [Oryza sativa Indica Group]
LOC_Os01g04290.MSUv7.0	7	6	2	11	0	6	0.214109	0.190054	0.0594048	0.371789	0	0.195245	XP_015641646.1	uncharacterized protein LOC4325689 [Oryza sativa Japonica Group]
LOC_Os01g04300.MSUv7.0	89	68	86	39	29	35	2.31587	1.83242	2.17309	1.12139	0.723837	0.968917	BAF03861.2	Os01g0134900, partial [Oryza sativa Japonica Group]
LOC_Os01g04324.MSUv7.0	35	63	45	52	57	54	0.93262	1.73847	1.16441	1.53112	1.4569	1.53082	BAH90894.1	Os01g0135400, partial [Oryza sativa Japonica Group]
LOC_Os01g04330.MSUv7.0	159	244	243	251	32	325	9.09671	14.4567	13.5005	15.8682	1.75612	19.7817	XP_015620971.1	probable calcium-binding protein CML16 [Oryza sativa Japonica Group]|Q5ZCK5.1 RecName: Full=Probable calcium-binding protein CML16; AltName: Full=Calmodulin-like protein 16|BAD52815.1 putative calcium binding protein [Oryza sativa Japonica Group]|EAY72427.1 hypothetical protein OsI_00281 [Oryza sativa Indica Group]|EAZ10442.1 hypothetical protein OsJ_00275 [Oryza sativa Japonica Group]|BAG88421.1…
LOC_Os01g04340.MSUv7.0	0	1	0	0	0	1	0	0.0579136	0	0	0	0.0594954	XP_015620983.1	16.6 kDa heat shock protein [Oryza sativa Japonica Group]|Q943Q3.1 RecName: Full=16.6 kDa heat shock protein; Short=OsHsp16.6|BAB64633.1 putative heat shock protein [Oryza sativa Japonica Group]|BAF03865.1 Os01g0135800 [Oryza sativa Japonica Group]|EAY72428.1 hypothetical protein OsI_00282 [Oryza sativa Indica Group]|EAZ10443.1 hypothetical protein OsJ_00276 [Oryza sativa Japonica Group]|BAG88822…
LOC_Os01g04350.MSUv7.0	710	694	789	299	274	221	38.912	39.389	41.9911	18.1077	14.4043	12.8858	XP_015624472.1	17.9 kDa heat shock protein 2 [Oryza sativa Japonica Group]|Q943E9.1 RecName: Full=17.9 kDa heat shock protein 2; Short=OsHsp17.9B|BAB64123.1 putative LMW heat shock protein [Oryza sativa Japonica Group]|BAG89624.1 unnamed protein product [Oryza sativa Japonica Group]|BAG99711.1 unnamed protein product [Oryza sativa Japonica Group]|ADR66971.1 16.9 kDa heat shock protein [Oryza sativa Japonica Gro…
LOC_Os01g04360.MSUv7.0	1	1	0	0	0	7	0.0660585	0.06841	0	0	0	0.491949	BAS70261.1	Os01g0136050, partial [Oryza sativa Japonica Group]
LOC_Os01g04370.MSUv7.0	0	0	3	0	0	0	0	0	0.178424	0	0	0	XP_015625199.1	16.9 kDa class I heat shock protein 1 [Oryza sativa Japonica Group]|P27777.1 RecName: Full=16.9 kDa class I heat shock protein 1; AltName: Full=16.9 kDa heat shock protein 1; Short=OsHsp16.9A|CAA43210.1 16.9 KD low molecular weight heat shock protein [Oryza sativa]|AAA33909.1 16.9 kDa heat shock protein [Oryza sativa Japonica Group]|BAB64126.1 putative heat shock protein [Oryza sativa Japonica Gr…
LOC_Os01g04380.MSUv7.0	0	0	2	0	1	3	0	0	0.119936	0	0.0592354	0.197096	XP_008780653.1	16.9 kDa class I heat shock protein 2 [Phoenix dactylifera]|XP_015630930.1 16.9 kDa class I heat shock protein 2 [Oryza sativa Japonica Group]|Q943E6.1 RecName: Full=16.9 kDa class I heat shock protein 2; AltName: Full=16.9 kDa heat shock protein 2; Short=OsHsp16.9B|AAA33910.1 16.9 kDa heat shock protein [Oryza sativa Japonica Group]|BAB64127.1 putative heat shock protein [Oryza sativa Japonica G…
LOC_Os01g04390.MSUv7.0	13	10	7	10	6	7	0.870902	0.693772	0.455386	0.740277	0.385563	0.498905	LOC_Os01g04390.MSUv7.0	-
LOC_Os01g04409.MSUv7.0	2243	2044	1824	1360	1580	1464	47.5226	44.8479	37.5276	31.8403	32.1104	32.9993	EEC69889.1	hypothetical protein OsI_00289 [Oryza sativa Indica Group]
LOC_Os01g04430.MSUv7.0	39	29	23	24	22	27	2.01057	1.54826	1.15143	1.36721	1.08792	1.48085	XP_025878303.1	LEAF RUST 10 DISEASE-RESISTANCE LOCUS RECEPTOR-LIKE PROTEIN KINASE-like 1.2 [Oryza sativa Japonica Group]
LOC_Os01g04440.MSUv7.0	53	76	71	37	21	54	1.70517	2.53218	2.21822	1.31541	0.648079	1.84832	BAB64132.1	hypothetical protein [Oryza sativa Japonica Group]
LOC_Os01g04450.MSUv7.0	405	433	453	416	581	314	8.93677	9.89474	9.70687	10.1435	12.2976	7.37138	XP_015642222.1	LEAF RUST 10 DISEASE-RESISTANCE LOCUS RECEPTOR-LIKE PROTEIN KINASE-like 1.2 [Oryza sativa Japonica Group]|XP_025878381.1 LEAF RUST 10 DISEASE-RESISTANCE LOCUS RECEPTOR-LIKE PROTEIN KINASE-like 1.2 [Oryza sativa Japonica Group]|XP_025878385.1 LEAF RUST 10 DISEASE-RESISTANCE LOCUS RECEPTOR-LIKE PROTEIN KINASE-like 1.2 [Oryza sativa Japonica Group]|BAD61462.1 putative receptor protein kinase CRINKLY…
LOC_Os01g04460.MSUv7.0	107	141	189	158	183	114	2.95072	4.02674	5.06129	4.8147	4.84075	3.34459	EEC69892.1	hypothetical protein OsI_00294 [Oryza sativa Indica Group]
LOC_Os01g04470.MSUv7.0	2	1	10	2	3	8	0.112814	0.058415	0.547758	0.124661	0.16232	0.480084	XP_025878304.1	cysteine-rich receptor-like protein kinase 2 [Oryza sativa Japonica Group]
LOC_Os01g04480.MSUv7.0	48	42	35	25	29	37	1.31189	1.18876	0.92892	0.755028	0.760275	1.07585	BAS70279.1	Os01g0137250 [Oryza sativa Japonica Group]
LOC_Os01g04490.MSUv7.0	73	81	113	48	91	78	2.19422	2.52135	3.2983	1.59428	2.62371	2.49428	XP_025878377.1	LEAF RUST 10 DISEASE-RESISTANCE LOCUS RECEPTOR-LIKE PROTEIN KINASE-like 2.1 [Oryza sativa Japonica Group]
LOC_Os01g04500.MSUv7.0	63	74	63	41	74	45	6.04709	7.35577	5.87221	4.34868	6.81327	4.59528	EEC69900.1	hypothetical protein OsI_00304 [Oryza sativa Indica Group]|EEE53827.1 hypothetical protein OsJ_00292 [Oryza sativa Japonica Group]
LOC_Os01g04520.MSUv7.0	45	35	55	20	18	39	1.24689	1.00433	1.47991	0.612371	0.478418	1.14967	BAS70285.1	Os01g0137500, partial [Oryza sativa Japonica Group]
LOC_Os01g04530.MSUv7.0	2	6	2	5	1	3	0.138433	0.430083	0.13443	0.382427	0.066394	0.220915	BAD61467.1	hypothetical protein [Oryza sativa Japonica Group]|EEE53830.1 hypothetical protein OsJ_00295 [Oryza sativa Japonica Group]|BAS70286.1 Os01g0137600 [Oryza sativa Japonica Group]
LOC_Os01g04540.MSUv7.0	9	17	13	4	12	11	0.212446	0.415572	0.297992	0.104336	0.27171	0.276244	BAF03881.1	Os01g0137700 [Oryza sativa Japonica Group]|BAG94388.1 unnamed protein product [Oryza sativa Japonica Group]|EEE53831.1 hypothetical protein OsJ_00296 [Oryza sativa Japonica Group]|BAS70287.1 Os01g0137700 [Oryza sativa Japonica Group]
LOC_Os01g04550.MSUv7.0	51	63	44	56	50	44	1.5303	1.95766	1.28208	1.85679	1.43911	1.4046	EEC69902.1	hypothetical protein OsI_00306 [Oryza sativa Indica Group]
LOC_Os01g04560.MSUv7.0	1	2	1	0	0	0	0.0507994	0.105215	0.0493303	0	0	0	XP_015636389.1	LEAF RUST 10 DISEASE-RESISTANCE LOCUS RECEPTOR-LIKE PROTEIN KINASE-like 1.2 [Oryza sativa Japonica Group]|EEE53833.1 hypothetical protein OsJ_00298 [Oryza sativa Japonica Group]
LOC_Os01g04570.MSUv7.0	185	261	159	103	168	166	4.27783	6.25004	3.5703	2.63182	3.72631	4.0837	XP_015621743.1	LEAF RUST 10 DISEASE-RESISTANCE LOCUS RECEPTOR-LIKE PROTEIN KINASE-like 2.1 isoform X1 [Oryza sativa Japonica Group]|BAD61469.1 putative receptor serine/threonine kinase PR5K [Oryza sativa Japonica Group]|BAG94349.1 unnamed protein product [Oryza sativa Japonica Group]|EEE53834.1 hypothetical protein OsJ_00299 [Oryza sativa Japonica Group]|BAF03883.2 Os01g0138300 [Oryza sativa Japonica Group]|BAS…
LOC_Os01g04580.MSUv7.0	351	1190	457	310	155	244	7.98175	28.0239	10.0917	7.7897	3.38096	5.90302	EEE53835.1	hypothetical protein OsJ_00300 [Oryza sativa Japonica Group]
LOC_Os01g04590.MSUv7.0	277	220	74	195	36	41	9.74833	8.01796	2.52893	7.58321	1.21527	1.53507	XP_015632907.1	uncharacterized protein LOC4325682 [Oryza sativa Japonica Group]|BAD61472.1 unknown protein [Oryza sativa Japonica Group]|BAF03885.1 Os01g0138500 [Oryza sativa Japonica Group]|BAG93455.1 unnamed protein product [Oryza sativa Japonica Group]|EEE53836.1 hypothetical protein OsJ_00301 [Oryza sativa Japonica Group]|BAS70298.1 Os01g0138500 [Oryza sativa Japonica Group]
LOC_Os01g04600.MSUv7.0	134	138	172	126	138	116	3.99777	4.26366	4.98306	4.15385	3.94921	3.68184	EAY72455.1	hypothetical protein OsI_00309 [Oryza sativa Indica Group]
LOC_Os01g04620.MSUv7.0	4521	6625	2661	4270	4588	5093	139.182	211.215	79.5516	145.259	135.485	166.808	XP_015620975.1	putative glutamine amidotransferase GAT1_2.1 isoform X1 [Oryza sativa Japonica Group]
LOC_Os01g04630.MSUv7.0	2545	2673	3918	1639	1224	1393	75.9712	82.6325	113.575	54.064	35.0478	44.2391	XP_015620974.1	L-Ala-D/L-amino acid epimerase [Oryza sativa Japonica Group]
LOC_Os01g04640.MSUv7.0	266	111	448	322	253	198	15.6478	6.76216	25.5921	20.9313	14.2761	12.3917	EAY72458.1	hypothetical protein OsI_00312 [Oryza sativa Indica Group]
LOC_Os01g04650.MSUv7.0	4080	3551	4995	3674	4451	4094	61.799	55.7009	73.4703	61.4933	64.6691	65.9724	XP_015616404.1	leucine-rich repeat extensin-like protein 2 [Oryza sativa Japonica Group]|BAD61300.1 unknown protein [Oryza sativa Japonica Group]|EAZ10471.1 hypothetical protein OsJ_00306 [Oryza sativa Japonica Group]|BAF03890.2 Os01g0139200 [Oryza sativa Japonica Group]|BAS70304.1 Os01g0139200 [Oryza sativa Japonica Group]
LOC_Os01g04660.MSUv7.0	5	9	1	13	51	33	0.153025	0.285249	0.0297198	0.439645	1.4972	1.07448	XP_015632821.1	putative lipid phosphate phosphatase 3, chloroplastic isoform X1 [Oryza sativa Japonica Group]|BAF03891.1 Os01g0139600 [Oryza sativa Japonica Group]|BAG93301.1 unnamed protein product [Oryza sativa Japonica Group]|BAS70306.1 Os01g0139600 [Oryza sativa Japonica Group]
LOC_Os01g04670.MSUv7.0	176	251	235	206	120	96	11.4808	16.956	14.8861	14.8489	7.50858	6.66229	XP_015642354.1	uncharacterized protein LOC9270987 [Oryza sativa Japonica Group]|BAD61303.1 hypothetical protein [Oryza sativa Japonica Group]|EAZ10473.1 hypothetical protein OsJ_00307 [Oryza sativa Japonica Group]|BAH00972.1 unnamed protein product [Oryza sativa Japonica Group]|BAH90900.1 Os01g0139700 [Oryza sativa Japonica Group]|BAS70307.1 Os01g0139700 [Oryza sativa Japonica Group]
LOC_Os01g04690.MSUv7.0	21	37	26	43	24	11	5.36531	9.78967	6.45066	12.1398	5.88172	2.98994	BAB21202.1	unknown protein [Oryza sativa Japonica Group]|BAF03892.1 Os01g0139900 [Oryza sativa Japonica Group]|EEE53839.1 hypothetical protein OsJ_00308 [Oryza sativa Japonica Group]|BAS70308.1 Os01g0139900 [Oryza sativa Japonica Group]
LOC_Os01g04699.MSUv7.0	1	2	0	0	3	0	0.0924116	0.191402	0	0	0.265929	0	BAD61305.1	hypothetical protein [Oryza sativa Japonica Group]
LOC_Os01g04710.MSUv7.0	68	65	83	107	58	69	1.78458	1.76657	2.11524	3.10297	1.46007	1.9265	XP_015626594.1	protein ASPARTIC PROTEASE IN GUARD CELL 1 [Oryza sativa Japonica Group]|BAB21205.1 putative aspartic proteinase nepenthesin I [Oryza sativa Japonica Group]|BAF03893.1 Os01g0140100 [Oryza sativa Japonica Group]|EAZ10476.1 hypothetical protein OsJ_00309 [Oryza sativa Japonica Group]|BAG91200.1 unnamed protein product [Oryza sativa Japonica Group]|BAS70310.1 Os01g0140100 [Oryza sativa Japonica Group]
LOC_Os01g04720.MSUv7.0	321	183	210	217	179	128	4.32426	2.55299	2.74714	3.23024	2.31301	1.83447	XP_015624195.1	receptor-like protein 4 [Oryza sativa Japonica Group]|BAD61307.1 senescence-induced receptor-like serine/threonine kinase -like [Oryza sativa Japonica Group]|BAF03894.1 Os01g0140400 [Oryza sativa Japonica Group]|BAG88956.1 unnamed protein product [Oryza sativa Japonica Group]|EEE53840.1 hypothetical protein OsJ_00310 [Oryza sativa Japonica Group]|BAS70311.1 Os01g0140400 [Oryza sativa Japonica Gro…
LOC_Os01g04730.MSUv7.0	2506	2511	3146	3161	2944	2492	185.267	192.245	225.855	258.231	208.772	196.001	XP_015621469.1	60S ribosomal protein L26-1 [Oryza sativa Japonica Group]|BAB21209.1 putative ribosomal protein L26 [Oryza sativa Japonica Group]|EAY72466.1 hypothetical protein OsI_00322 [Oryza sativa Indica Group]|EAY72469.1 hypothetical protein OsI_00325 [Oryza sativa Indica Group]
LOC_Os01g04750.MSUv7.0	27	13	7	12	9	9	0.843166	0.42042	0.212277	0.414094	0.269594	0.29901	XP_025878463.1	putative AP2/ERF and B3 domain-containing protein Os01g0140700 [Oryza sativa Japonica Group]|Q9AWS7.1 RecName: Full=Putative AP2/ERF and B3 domain-containing protein Os01g0140700|BAB21211.1 putative AP2 domain containing protein RAP2.8 [Oryza sativa Japonica Group]|BAS70315.1 Os01g0140700 [Oryza sativa Japonica Group]
LOC_Os01g04800.MSUv7.0	418	426	431	294	340	396	13.642	14.398	13.6595	10.6027	10.6438	13.7496	XP_015622259.1	AP2/ERF and B3 domain-containing protein Os01g0141000 [Oryza sativa Japonica Group]|Q9AWS0.1 RecName: Full=AP2/ERF and B3 domain-containing protein Os01g0141000|BAB21218.1 putative AP2 domain containing protein RAP2.8 [Oryza sativa Japonica Group]|BAF03896.1 Os01g0141000 [Oryza sativa Japonica Group]|BAG89320.1 unnamed protein product [Oryza sativa Japonica Group]|BAS70316.1 Os01g0141000 [Oryza s…
LOC_Os01g04814.MSUv7.0	3995	4158	3918	4503	4331	4327	105.695	113.924	100.661	131.647	109.912	121.792	BAS70319.1	Os01g0141150, partial [Oryza sativa Japonica Group]
LOC_Os01g04860.MSUv7.0	37	21	26	18	22	17	1.08829	0.639664	0.742627	0.585036	0.620701	0.531967	XP_015622247.1	protein root UVB sensitive 5 isoform X1 [Oryza sativa Japonica Group]
LOC_Os01g04870.MSUv7.0	531	579	596	404	734	567	13.1227	14.8183	14.3031	11.0326	17.3998	14.9075	EEC69915.1	hypothetical protein OsI_00336 [Oryza sativa Indica Group]
LOC_Os01g04880.MSUv7.0	258	161	185	206	349	177	4.09969	2.64941	2.85469	3.61715	5.31955	2.99226	EEE53844.1	hypothetical protein OsJ_00321 [Oryza sativa Japonica Group]
LOC_Os01g04900.MSUv7.0	150	133	128	145	179	150	2.71742	2.49522	2.25181	2.9027	3.11055	2.89102	XP_015613107.1	probable zinc metalloprotease EGY2, chloroplastic isoform X1 [Oryza sativa Japonica Group]|Q0JQS5.1 RecName: Full=Probable zinc metalloprotease EGY2, chloroplastic; AltName: Full=Protein ETHYLENE-DEPENDENT GRAVITROPISM-DEFICIENT AND YELLOW-GREEN 2; Short=OsEGY2; Flags: Precursor|BAF03903.1 Os01g0142100 [Oryza sativa Japonica Group]|EEE53845.1 hypothetical protein OsJ_00322 [Oryza sativa Japonica …
LOC_Os01g04910.MSUv7.0	273	290	338	236	277	246	13.4615	14.8088	16.1846	12.8591	13.1017	12.905	XP_015613150.1	EKC/KEOPS complex subunit TPRKB [Oryza sativa Japonica Group]|BAB16454.1 unknown protein [Oryza sativa Japonica Group]|BAF03904.1 Os01g0142200 [Oryza sativa Japonica Group]|BAG95877.1 unnamed protein product [Oryza sativa Japonica Group]|BAG98731.1 unnamed protein product [Oryza sativa Japonica Group]|EEE53846.1 hypothetical protein OsJ_00323 [Oryza sativa Japonica Group]|BAS70328.1 Os01g0142200 …
LOC_Os01g04920.MSUv7.0	44	39	75	44	62	73	1.07013	0.982288	1.77133	1.18251	1.44642	1.88886	BAD61068.1	unknown protein [Oryza sativa Japonica Group]|BAD61477.1 unknown protein [Oryza sativa Japonica Group]|BAF03905.1 Os01g0142300 [Oryza sativa Japonica Group]|EEE53847.1 hypothetical protein OsJ_00324 [Oryza sativa Japonica Group]|BAS70329.1 Os01g0142300 [Oryza sativa Japonica Group]
LOC_Os01g04930.MSUv7.0	2279	2339	2744	1327	1355	1474	48.4626	51.509	56.6633	31.1818	27.6388	33.3467	XP_015621817.1	transcription factor DIVARICATA [Oryza sativa Japonica Group]|BAF03906.1 Os01g0142500 [Oryza sativa Japonica Group]|ACF60468.1 myb transcription factor [Oryza sativa Japonica Group]|BAG90685.1 unnamed protein product [Oryza sativa Japonica Group]|EEE53848.1 hypothetical protein OsJ_00326 [Oryza sativa Japonica Group]|ADX60240.1 MYB transcription factor, partial [Oryza sativa Japonica Group]|BAS70…
LOC_Os01g04950.MSUv7.0	722	637	628	641	945	678	9.07421	8.2909	7.66455	8.90221	11.3926	9.06557	BAS70333.1	Os01g0142800, partial [Oryza sativa Japonica Group]
LOC_Os01g04990.MSUv7.0	162	150	149	144	145	137	5.63273	5.40115	5.0309	5.53267	4.83604	5.06779	XP_015621915.1	mitochondrial substrate carrier family protein B isoform X1 [Oryza sativa Japonica Group]|BAF03909.1 Os01g0143100 [Oryza sativa Japonica Group]|BAG92790.1 unnamed protein product [Oryza sativa Japonica Group]|BAG97999.1 unnamed protein product [Oryza sativa Japonica Group]|EEC69923.1 hypothetical protein OsI_00349 [Oryza sativa Indica Group]|EEE53849.1 hypothetical protein OsJ_00329 [Oryza sativa…
LOC_Os01g05010.MSUv7.0	179	195	289	160	225	224	7.87965	8.88954	12.354	7.78291	9.50067	10.4905	EAY72494.1	hypothetical protein OsI_00351 [Oryza sativa Indica Group]
LOC_Os01g05020.MSUv7.0	6	11	8	27	2	2	0.155119	0.294509	0.200845	0.771342	0.0495979	0.0550096	XP_015636413.1	uncharacterized protein LOC4325459 [Oryza sativa Japonica Group]|BAB16465.1 hypothetical protein [Oryza sativa Japonica Group]|BAB40120.1 hypothetical protein [Oryza sativa Japonica Group]|BAF03911.1 Os01g0143400 [Oryza sativa Japonica Group]|EAZ10499.1 hypothetical protein OsJ_00332 [Oryza sativa Japonica Group]|BAS70340.1 Os01g0143400 [Oryza sativa Japonica Group]
LOC_Os01g05040.MSUv7.0	1	0	0	0	0	0	0.036346	0	0	0	0	0	EAZ10500.1	hypothetical protein OsJ_00333 [Oryza sativa Japonica Group]
LOC_Os01g05050.MSUv7.0	0	0	5	4	7	3	0	0	0.313587	0.28547	0.433659	0.206133	XP_015646531.1	uncharacterized protein At2g39795, mitochondrial [Oryza sativa Japonica Group]|BAB16469.1 hypothetical protein [Oryza sativa Japonica Group]|BAB40124.1 hypothetical protein [Oryza sativa Japonica Group]|EEE53851.1 hypothetical protein OsJ_00334 [Oryza sativa Japonica Group]|BAF03913.2 Os01g0143700 [Oryza sativa Japonica Group]|BAS70344.1 Os01g0143700 [Oryza sativa Japonica Group]
LOC_Os01g05060.MSUv7.0	453	467	527	397	499	497	20.0428	21.3977	22.6426	19.4097	21.1777	23.3943	EAZ10502.1	hypothetical protein OsJ_00335 [Oryza sativa Japonica Group]
LOC_Os01g05064.MSUv7.0	1332	1498	1579	816	821	1295	105.348	122.694	121.271	71.3146	62.2847	108.964	BAD61078.1	unknown protein [Oryza sativa Japonica Group]|BAD61487.1 unknown protein [Oryza sativa Japonica Group]|EEC69926.1 hypothetical protein OsI_00356 [Oryza sativa Indica Group]|EEE53852.1 hypothetical protein OsJ_00336 [Oryza sativa Japonica Group]|BAH90901.1 Os01g0143900 [Oryza sativa Japonica Group]|BAS70347.1 Os01g0143900 [Oryza sativa Japonica Group]
LOC_Os01g05070.MSUv7.0	1250	1898	1003	620	676	689	42.8902	67.4427	33.4198	23.5076	22.2491	25.1513	XP_015612235.1	probable pectin methylesterase CGR2 isoform X2 [Oryza sativa Japonica Group]
LOC_Os01g05080.MSUv7.0	35	42	33	34	44	21	1.31997	1.64035	1.20856	1.41692	1.59173	0.842579	XP_015612258.1	thylakoid lumenal 15 kDa protein 1, chloroplastic [Oryza sativa Japonica Group]|BAB40127.1 unknown protein [Oryza sativa Japonica Group]|BAF03916.1 Os01g0144100 [Oryza sativa Japonica Group]|BAG96389.1 unnamed protein product [Oryza sativa Japonica Group]|BAG86838.1 unnamed protein product [Oryza sativa Japonica Group]|BAS70349.1 Os01g0144100 [Oryza sativa Japonica Group]
LOC_Os01g05090.MSUv7.0	86	111	98	69	88	76	4.1891	5.59932	4.63557	3.71397	4.11171	3.93848	XP_015612246.1	glucose-induced degradation protein 4 homolog [Oryza sativa Japonica Group]|BAD61488.1 unknown protein [Oryza sativa Japonica Group]|BAF03917.1 Os01g0144200 [Oryza sativa Japonica Group]|BAG87095.1 unnamed protein product [Oryza sativa Japonica Group]|EEE53854.1 hypothetical protein OsJ_00338 [Oryza sativa Japonica Group]|BAS70350.1 Os01g0144200 [Oryza sativa Japonica Group]
LOC_Os01g05100.MSUv7.0	18	10	9	15	13	16	0.513499	0.295432	0.249325	0.472853	0.355736	0.485602	XP_015612202.1	uncharacterized protein LOC4325467 [Oryza sativa Japonica Group]|BAD61489.1 unknown protein [Oryza sativa Japonica Group]|BAF03918.1 Os01g0144300 [Oryza sativa Japonica Group]|BAS70351.1 Os01g0144300 [Oryza sativa Japonica Group]
LOC_Os01g05105.MSUv7.0	52	63	54	24	76	56	0.56311	0.706514	0.567857	0.28719	0.789444	0.645166	BAS70353.1	Os01g0144380 [Oryza sativa Japonica Group]
LOC_Os01g05120.MSUv7.0	0	3	1	0	0	1	0	0.191402	0.0598261	0	0	0.0655434	BAS70354.1	Os01g0144500, partial [Oryza sativa Japonica Group]
LOC_Os01g05130.MSUv7.0	529	547	504	672	736	679	26.8467	28.7484	24.8383	37.6853	35.8287	36.6605	XP_015623824.1	uncharacterized protein LOC4325469 [Oryza sativa Japonica Group]|BAD61492.1 unknown protein [Oryza sativa Japonica Group]|BAF03919.1 Os01g0144600 [Oryza sativa Japonica Group]|BAG87968.1 unnamed protein product [Oryza sativa Japonica Group]|BAG95735.1 unnamed protein product [Oryza sativa Japonica Group]|EEE53856.1 hypothetical protein OsJ_00342 [Oryza sativa Japonica Group]|BAS70355.1 Os01g01446…
LOC_Os01g05140.MSUv7.0	192	220	300	212	213	187	15.2315	18.074	23.1109	18.5842	16.2083	15.7825	BAB21113.1	hypothetical protein [Oryza sativa Japonica Group]
LOC_Os01g05150.MSUv7.0	21	13	14	8	7	8	1.36474	0.874914	0.883517	0.574499	0.436362	0.553114	EAY72504.1	hypothetical protein OsI_00365 [Oryza sativa Indica Group]|EEE53858.1 hypothetical protein OsJ_00344 [Oryza sativa Japonica Group]
LOC_Os01g05170.MSUv7.0	0	0	3	0	0	0	0	0	0.225615	0	0	0	BAH90903.1	Os01g0145000 [Oryza sativa Japonica Group]
LOC_Os01g05180.MSUv7.0	328	252	312	336	313	217	15.2366	12.1228	14.0742	17.2473	13.9468	10.7242	XP_015618398.1	uncharacterized protein LOC9272059 [Oryza sativa Japonica Group]|EEE53859.1 hypothetical protein OsJ_00346 [Oryza sativa Japonica Group]|BAS70361.1 Os01g0145200 [Oryza sativa Japonica Group]
LOC_Os01g05220.MSUv7.0	0	2	1	1	0	0	0	0.214188	0.100422	0.114273	0	0	EAZ10514.1	hypothetical protein OsJ_00348 [Oryza sativa Japonica Group]
LOC_Os01g05250.MSUv7.0	18	25	34	5	0	21	2.54245	3.65687	4.66352	0.7804	0	3.15567	BAD61249.1	hypothetical protein [Oryza sativa Japonica Group]|BAS70366.1 Os01g0145800 [Oryza sativa Japonica Group]
LOC_Os01g05260.MSUv7.0	6	11	22	7	8	8	0.599082	1.13741	2.13311	0.772327	0.766202	0.849804	BAD61250.1	hypothetical protein [Oryza sativa Japonica Group]
LOC_Os01g05289.MSUv7.0	1	21	11	1	0	6	0.0545761	1.18689	0.582976	0.0603073	0	0.348375	BAH90907.1	Os01g0146101, partial [Oryza sativa Japonica Group]|BAS70369.1 Os01g0146101, partial [Oryza sativa Japonica Group]
LOC_Os01g05310.MSUv7.0	0	0	2	0	1	2	0	0	0.104356	0	0.0515409	0.114329	EEE53865.1	hypothetical protein OsJ_00355 [Oryza sativa Japonica Group]|BAH90908.1 Os01g0146200 [Oryza sativa Japonica Group]|BAS70370.1 Os01g0146200 [Oryza sativa Japonica Group]
LOC_Os01g05350.MSUv7.0	1	4	5	0	0	0	0.0663106	0.274684	0.321965	0	0	0	BAS70373.1	Os01g0146600, partial [Oryza sativa Japonica Group]
LOC_Os01g05380.MSUv7.0	0	3	0	0	0	0	0	0.299309	0	0	0	0	BAS70375.1	Os01g0146801 [Oryza sativa Japonica Group]
LOC_Os01g05410.MSUv7.0	11	7	8	5	7	7	1.42617	0.939871	1.00722	0.716337	0.870554	0.965542	BAD61263.1	hypothetical protein [Oryza sativa Japonica Group]
LOC_Os01g05420.MSUv7.0	1637	1874	1738	1535	1496	1488	38.4154	45.5426	39.6061	39.8046	33.6749	37.1496	BAS70381.1	Os01g0147200 [Oryza sativa Japonica Group]
LOC_Os01g05430.MSUv7.0	28	28	35	31	47	49	1.12779	1.16794	1.36897	1.37975	1.81588	2.09972	EAY72522.1	hypothetical protein OsI_00383 [Oryza sativa Indica Group]
LOC_Os01g05440.MSUv7.0	0	0	1	0	3	0	0	0	0.0409489	0	0.121346	0	BAD61124.1	putative transcription factor X1 [Oryza sativa Japonica Group]|BAD61267.1 putative transcription factor X1 [Oryza sativa Japonica Group]|BAF03927.1 Os01g0147400 [Oryza sativa Japonica Group]|EAZ10530.1 hypothetical protein OsJ_00362 [Oryza sativa Japonica Group]
LOC_Os01g05450.MSUv7.0	4	5	2	1	3	2	0.416129	0.538677	0.202047	0.114957	0.299369	0.221356	EAY72524.1	hypothetical protein OsI_00385 [Oryza sativa Indica Group]
LOC_Os01g05460.MSUv7.0	63	24	34	37	27	33	5.47262	2.15902	2.86806	3.5516	2.24976	3.04973	XP_015636430.1	centromere-binding protein 1, partial [Oryza sativa Japonica Group]
LOC_Os01g05470.MSUv7.0	572	546	632	479	853	616	11.6138	11.4806	12.461	10.7469	16.6129	13.3062	XP_015622059.1	factor of DNA methylation 1 [Oryza sativa Japonica Group]|BAD61126.1 putative transcription factor X1 [Oryza sativa Japonica Group]|BAD61269.1 putative transcription factor X1 [Oryza sativa Japonica Group]|BAF03928.1 Os01g0147700 [Oryza sativa Japonica Group]|BAS70386.1 Os01g0147700 [Oryza sativa Japonica Group]
LOC_Os01g05480.MSUv7.0	0	0	5	0	0	0	0	0	0.103928	0	0	0	BAS70388.1	Os01g0147800, partial [Oryza sativa Japonica Group]
LOC_Os01g05490.MSUv7.0	5018	4866	6338	4220	5404	4609	168.517	169.23	206.691	156.601	174.079	164.67	AAB63603.1	triosephosphate isomerase, partial [Oryza sativa]
LOC_Os01g05500.MSUv7.0	3664	3277	3348	2755	4421	3880	28.7213	26.6021	25.4853	23.8638	33.242	32.3575	BAS70390.1	Os01g0148000 [Oryza sativa Japonica Group]
LOC_Os01g05510.MSUv7.0	0	1	0	0	2	0	0	0.0214444	0	0	0.0397256	0	XP_015623626.1	uncharacterized protein LOC4325213 [Oryza sativa Japonica Group]
LOC_Os01g05530.MSUv7.0	0	3	0	0	0	0	0	0.0623513	0	0	0	0	EAZ10538.1	hypothetical protein OsJ_00371 [Oryza sativa Japonica Group]
LOC_Os01g05580.MSUv7.0	12	5	6	7	11	18	1.17124	0.505388	0.568684	0.754971	1.02985	1.86909	BAD61135.1	hypothetical protein [Oryza sativa Japonica Group]
LOC_Os01g05585.MSUv7.0	0	0	2	0	0	0	0	0	0.519106	0	0	0	BAS98358.1	Os06g0578100 [Oryza sativa Japonica Group]
LOC_Os01g05600.MSUv7.0	103	93	79	51	94	65	1.80571	1.68844	1.34491	0.987982	1.58073	1.21232	XP_015644949.1	putative disease resistance protein RGA1 [Oryza sativa Japonica Group]|XP_015644965.1 putative disease resistance protein RGA1 [Oryza sativa Japonica Group]|XP_015644973.1 putative disease resistance protein RGA1 [Oryza sativa Japonica Group]|XP_025878576.1 putative disease resistance protein RGA1 [Oryza sativa Japonica Group]|XP_025878581.1 putative disease resistance protein RGA1 [Oryza sativa …
LOC_Os01g05610.MSUv7.0	401	406	361	376	442	475	21.4581	22.499	18.759	22.2332	22.6875	27.0417	A2WKP3.1	RecName: Full=Histone H2B.3|EAY72539.1 hypothetical protein OsI_00404 [Oryza sativa Indica Group]
LOC_Os01g05620.MSUv7.0	101	157	131	40	110	72	1.77244	2.85325	2.23242	0.77567	1.85165	1.34424	XP_015644979.1	putative disease resistance protein RGA1 [Oryza sativa Japonica Group]|XP_025878583.1 putative disease resistance protein RGA1 [Oryza sativa Japonica Group]|XP_025878584.1 putative disease resistance protein RGA1 [Oryza sativa Japonica Group]|XP_025878590.1 putative disease resistance protein RGA1 [Oryza sativa Japonica Group]|XP_025878591.1 putative disease resistance protein RGA1 [Oryza sativa …
LOC_Os01g05630.MSUv7.0	435	444	437	613	538	758	23.3254	24.6555	22.755	36.3218	27.6719	43.2416	A2WKP3.1	RecName: Full=Histone H2B.3|EAY72539.1 hypothetical protein OsI_00404 [Oryza sativa Indica Group]
LOC_Os01g05640.MSUv7.0	93	101	84	83	74	78	1.46573	1.64848	1.2856	1.4455	1.11872	1.30786	BAD61138.1	putative protein kinase Xa21 [Oryza sativa Japonica Group]|EAZ10548.1 hypothetical protein OsJ_00382 [Oryza sativa Japonica Group]|BAF03941.2 Os01g0149700 [Oryza sativa Japonica Group]
LOC_Os01g05650.MSUv7.0	7177	8379	11262	7641	6759	8398	494.143	597.438	752.975	581.337	446.386	615.147	LOC_Os01g05650.MSUv7.0	-
LOC_Os01g05660.MSUv7.0	248	325	244	354	325	438	3.92047	5.3206	3.74569	6.18384	4.9282	7.36639	XP_025878594.1	uncharacterized protein LOC4324515 isoform X1 [Oryza sativa Japonica Group]|XP_025878595.1 uncharacterized protein LOC4324515 isoform X1 [Oryza sativa Japonica Group]|XP_025878596.1 uncharacterized protein LOC4324515 isoform X1 [Oryza sativa Japonica Group]
LOC_Os01g05670.MSUv7.0	1023	1023	1312	1149	1358	1211	36.95	38.2653	46.0181	45.8593	47.0497	46.5347	BAS70411.1	Os01g0150000, partial [Oryza sativa Japonica Group]
LOC_Os01g05680.MSUv7.0	427	344	364	287	380	318	34.6656	28.9214	28.6964	25.7466	29.5919	27.4657	BAS70412.1	Os01g0150100 [Oryza sativa Japonica Group]
LOC_Os01g05694.MSUv7.0	766	804	776	602	405	508	71.9352	78.1915	70.7668	62.4708	36.4826	50.754	NP_001347560.1	uncharacterized protein LOC111946217 [Oryza sativa Japonica Group]|XP_025878622.1 very-long-chain (3R)-3-hydroxyacyl-CoA dehydratase PASTICCINO 2B [Oryza sativa Japonica Group]|Q5ZEJ0.1 RecName: Full=Very-long-chain (3R)-3-hydroxyacyl-CoA dehydratase PASTICCINO 2B; AltName: Full=3-hydroxyacyl-CoA dehydratase PASTICCINO 2B; Short=HACD; Short=PAS2B; AltName: Full=Protein tyrosine phosphatase-like p…
LOC_Os01g05710.MSUv7.0	7	21	5	3	1	0	0.465358	1.44577	0.322786	0.220383	0.0637687	0	BAS70415.1	Os01g0150400 [Oryza sativa Japonica Group]
LOC_Os01g05720.MSUv7.0	0	1	4	1	1	6	0	0.0765609	0.287165	0.0816929	0.0709144	0.471912	BAF03948.2	Os01g0150500 [Oryza sativa Japonica Group]
LOC_Os01g05744.MSUv7.0	150	126	143	77	174	96	6.18514	5.38047	5.72598	3.50847	6.88218	4.21137	EEE53882.1	hypothetical protein OsJ_00391 [Oryza sativa Japonica Group]
LOC_Os01g05770.MSUv7.0	14	4	2	5	4	12	0.533393	0.157823	0.0739954	0.210503	0.146183	0.486401	XP_025878609.1	uncharacterized protein LOC4324522 isoform X1 [Oryza sativa Japonica Group]
LOC_Os01g05780.MSUv7.0	0	0	0	0	0	3	0	0	0	0	0	0.287304	CAH65761.1	H0215A08.3 [Oryza sativa]
LOC_Os01g05790.MSUv7.0	576	517	645	593	579	684	11.7592	10.9304	12.787	13.3776	11.3384	14.8561	XP_015621443.1	uncharacterized protein LOC4324523 [Oryza sativa Japonica Group]|BAD61110.1 unknown protein [Oryza sativa Japonica Group]|AAX09673.1 sodium-lithium tolerant 2 [Oryza sativa Japonica Group]|BAF03951.1 Os01g0151100 [Oryza sativa Japonica Group]|BAH00167.1 unnamed protein product [Oryza sativa Japonica Group]|BAS70423.1 Os01g0151100 [Oryza sativa Japonica Group]
LOC_Os01g05800.MSUv7.0	727	748	827	732	806	752	15.5102	16.5263	17.1334	17.2568	16.4943	17.0684	EAZ10562.1	hypothetical protein OsJ_00395 [Oryza sativa Japonica Group]
LOC_Os01g05810.MSUv7.0	246	373	529	197	399	383	5.19091	8.15095	10.8398	4.59349	8.07606	8.59807	BAF03953.1	Os01g0151400 [Oryza sativa Japonica Group]
LOC_Os01g05820.MSUv7.0	241	267	572	410	184	205	7.42373	8.5174	17.1103	13.9559	5.43677	6.7182	XP_015629579.1	glutathione hydrolase 3 [Oryza sativa Japonica Group]
LOC_Os01g05830.MSUv7.0	1376	1194	940	1526	1298	1238	38.9556	35.0064	25.8425	47.7391	35.2488	37.2877	XP_015639396.1	uncharacterized protein LOC4324527 [Oryza sativa Japonica Group]|BAD61114.1 unknown protein [Oryza sativa Japonica Group]|BAF03955.1 Os01g0151600 [Oryza sativa Japonica Group]|BAG88700.1 unnamed protein product [Oryza sativa Japonica Group]|EEC69966.1 hypothetical protein OsI_00426 [Oryza sativa Indica Group]|EEE53885.1 hypothetical protein OsJ_00397 [Oryza sativa Japonica Group]|BAS70429.1 Os01g…
LOC_Os01g05840.MSUv7.0	6	3	8	6	4	4	0.201886	0.104536	0.261396	0.223087	0.129102	0.143188	EAZ10566.1	hypothetical protein OsJ_00398 [Oryza sativa Japonica Group]
LOC_Os01g05850.MSUv7.0	39	10	13	8	5	9	4.37137	1.16076	1.41498	0.990856	0.537577	1.07322	XP_015636454.1	uncharacterized protein LOC107277572 [Oryza sativa Japonica Group]|BAB03619.1 hypothetical protein [Oryza sativa Japonica Group]|BAB44040.1 hypothetical protein [Oryza sativa Japonica Group]|BAS70432.1 Os01g0151800 [Oryza sativa Japonica Group]
LOC_Os01g05860.MSUv7.0	95	94	74	70	132	88	2.09628	2.14805	1.58567	1.70684	2.79394	2.06587	XP_015629832.1	putative pentatricopeptide repeat-containing protein At3g15200 [Oryza sativa Japonica Group]|BAB03620.1 hypothetical protein [Oryza sativa Japonica Group]|BAB44041.1 hypothetical protein [Oryza sativa Japonica Group]|BAH01114.1 unnamed protein product [Oryza sativa Japonica Group]|BAH90916.1 Os01g0151900 [Oryza sativa Japonica Group]|BAS70433.1 Os01g0151900 [Oryza sativa Japonica Group]
LOC_Os01g05870.MSUv7.0	9	16	14	0	3	19	0.104589	0.192555	0.157989	0	0.0334412	0.234904	XP_015622396.1	putative receptor-like protein kinase At3g47110 [Oryza sativa Japonica Group]|BAB03621.1 putative protein kinase Xa21 [Oryza sativa Japonica Group]|BAB44042.1 putative protein kinase Xa21 [Oryza sativa Japonica Group]|BAF03957.1 Os01g0152000 [Oryza sativa Japonica Group]|EAZ10569.1 hypothetical protein OsJ_00401 [Oryza sativa Japonica Group]|BAS70434.1 Os01g0152000 [Oryza sativa Japonica Group]
LOC_Os01g05880.MSUv7.0	0	0	1	0	0	0	0	0	0.0412493	0	0	0	BAS70436.1	Os01g0152100 [Oryza sativa Japonica Group]
LOC_Os01g05900.MSUv7.0	206	227	238	236	245	216	14.6277	16.6927	16.4113	18.5178	16.6876	16.3176	BAF03960.1	Os01g0152600 [Oryza sativa Japonica Group]
LOC_Os01g05940.MSUv7.0	76	49	52	30	39	63	0.935774	0.624805	0.62175	0.408175	0.460617	0.825261	BAF03960.1	Os01g0152600 [Oryza sativa Japonica Group]
LOC_Os01g05960.MSUv7.0	31	27	28	50	79	54	0.471057	0.42488	0.413166	0.839556	1.15148	0.872969	XP_015621243.1	receptor kinase-like protein Xa21 [Oryza sativa Japonica Group]|BAD61117.1 putative protein kinase Xa21 [Oryza sativa Japonica Group]|BAD61339.1 putative protein kinase Xa21 [Oryza sativa Japonica Group]|BAF03962.1 Os01g0152800 [Oryza sativa Japonica Group]|BAG95699.1 unnamed protein product [Oryza sativa Japonica Group]|BAS70443.1 Os01g0152800 [Oryza sativa Japonica Group]
LOC_Os01g05970.MSUv7.0	859	982	1007	1072	809	993	49.471	58.5679	56.3173	68.2213	44.6914	60.8415	XP_015624387.1	uncharacterized protein LOC9268949 [Oryza sativa Japonica Group]|BAD61118.1 hypothetical protein [Oryza sativa Japonica Group]|BAD61340.1 hypothetical protein [Oryza sativa Japonica Group]|EEE53891.1 hypothetical protein OsJ_00411 [Oryza sativa Japonica Group]|BAH90917.1 Os01g0152950 [Oryza sativa Japonica Group]|BAS70446.1 Os01g0152950 [Oryza sativa Japonica Group]
LOC_Os01g05980.MSUv7.0	171	147	106	91	176	165	2.84837	2.53576	1.71459	1.67498	2.8121	2.924	XP_015621594.1	receptor kinase-like protein Xa21 [Oryza sativa Japonica Group]|BAF03964.1 Os01g0153000 [Oryza sativa Japonica Group]|EAZ10580.1 hypothetical protein OsJ_00412 [Oryza sativa Japonica Group]|BAS70448.1 Os01g0153000 [Oryza sativa Japonica Group]
LOC_Os01g06000.MSUv7.0	177	156	150	115	204	139	2.85966	2.6101	2.35336	2.05309	3.16147	2.38918	BAF03966.1	Os01g0153200 [Oryza sativa Japonica Group]
LOC_Os01g06010.MSUv7.0	276	374	425	368	254	359	16.3654	22.9657	24.4715	24.112	14.4467	22.6467	XP_008670625.1	histone H2B.2-like [Zea mays]|ONM25830.1 Histone H2B [Zea mays]|PWZ37870.1 Histone H2B.2 [Zea mays]
LOC_Os01g06020.MSUv7.0	299	303	337	311	336	315	10.431	10.9468	11.4167	11.989	11.2438	11.6912	BAF03968.1	Os01g0153400, partial [Oryza sativa Japonica Group]|BAS70456.1 Os01g0153400, partial [Oryza sativa Japonica Group]
LOC_Os01g06050.MSUv7.0	21	20	49	18	20	19	0.611807	0.603415	1.38627	0.579476	0.558912	0.588901	BAD61349.1	unknown protein [Oryza sativa Japonica Group]|BAF03970.1 Os01g0153700 [Oryza sativa Japonica Group]|BAG97407.1 unnamed protein product [Oryza sativa Japonica Group]|BAS70462.1 Os01g0153700 [Oryza sativa Japonica Group]
LOC_Os01g06060.MSUv7.0	0	3	1	0	0	3	0	0.133713	0.0417943	0	0	0.137365	BAS70463.1	Os01g0153800, partial [Oryza sativa Japonica Group]
LOC_Os01g06130.MSUv7.0	0	0	0	0	0	1	0	0	0	0	0	0.0511529	EEE53896.1	hypothetical protein OsJ_00425 [Oryza sativa Japonica Group]
LOC_Os01g06150.MSUv7.0	2	0	2	1	1	1	0.100135	0	0.097239	0.0553252	0.0480256	0.0532658	XP_015631853.1	uncharacterized protein LOC4324074 [Oryza sativa Japonica Group]|XP_015631864.1 uncharacterized protein LOC4324074 [Oryza sativa Japonica Group]|BAD61354.1 unknown protein [Oryza sativa Japonica Group]|BAD61419.1 unknown protein [Oryza sativa Japonica Group]|BAF03975.1 Os01g0154600 [Oryza sativa Japonica Group]|EAZ10595.1 hypothetical protein OsJ_00427 [Oryza sativa Japonica Group]|BAG97772.1 unn…
LOC_Os01g06200.MSUv7.0	2	3	3	4	1	1	0.0447191	0.0694665	0.0651388	0.0988306	0.0214477	0.0237879	CAH66738.1	H0404F02.14 [Oryza sativa]
LOC_Os01g06220.MSUv7.0	447	501	552	982	497	663	16.9069	19.6239	20.2745	41.0427	18.0315	26.6786	XP_015621598.1	probable carboxylesterase 15 [Oryza sativa Japonica Group]|BAB44070.1 putative PrMC3 [Oryza sativa Japonica Group]|BAB64639.1 putative PrMC3 [Oryza sativa Japonica Group]|BAF03977.1 Os01g0155000 [Oryza sativa Japonica Group]|EAZ10597.1 hypothetical protein OsJ_00429 [Oryza sativa Japonica Group]|BAG93577.1 unnamed protein product [Oryza sativa Japonica Group]|BAG87397.1 unnamed protein product [O…
LOC_Os01g06230.MSUv7.0	81	71	103	35	24	30	15.2961	13.885	18.8881	7.30353	4.34736	6.02714	XP_015621608.1	auxin-responsive protein SAUR71 [Oryza sativa Japonica Group]|BAB44071.1 hypothetical protein [Oryza sativa Japonica Group]|BAD61420.1 hypothetical protein [Oryza sativa Japonica Group]|BAS70475.1 Os01g0155100 [Oryza sativa Japonica Group]
LOC_Os01g06240.MSUv7.0	0	4	0	0	0	0	0	0.0864991	0	0	0	0	BAB64641.1	putative S-domain receptor-like protein kinase [Oryza sativa Japonica Group]|EAZ10598.1 hypothetical protein OsJ_00430 [Oryza sativa Japonica Group]|BAS70476.1 Os01g0155200 [Oryza sativa Japonica Group]
LOC_Os01g06250.MSUv7.0	29	19	10	17	14	9	1.4775	1.00248	0.494749	0.957077	0.684189	0.487827	XP_015621587.1	dirigent protein 25 [Oryza sativa Japonica Group]|BAB64642.1 hypothetical protein [Oryza sativa Japonica Group]|BAS70477.1 Os01g0155300 [Oryza sativa Japonica Group]
LOC_Os01g06270.MSUv7.0	763	720	897	684	644	767	19.3894	18.948	22.1354	19.2072	15.698	20.7362	BAS70478.1	Os01g0155400, partial [Oryza sativa Japonica Group]
LOC_Os01g06280.MSUv7.0	51	51	86	27	41	98	0.644707	0.667657	1.05571	0.377159	0.497158	1.31799	EAZ10602.1	hypothetical protein OsJ_00433 [Oryza sativa Japonica Group]
LOC_Os01g06290.MSUv7.0	1994	1875	1979	1736	2213	2070	37.9159	36.9223	36.5425	36.4766	40.3642	41.8756	EAZ10602.1	hypothetical protein OsJ_00433 [Oryza sativa Japonica Group]
LOC_Os01g06310.MSUv7.0	182	295	1120	55	59	88	12.6142	21.1739	75.3809	4.21229	3.92245	6.4888	EAY89819.1	hypothetical protein OsI_11366 [Oryza sativa Indica Group]
LOC_Os01g06320.MSUv7.0	0	3	0	0	0	0	0	0.117083	0	0	0	0	XP_015646001.1	protein REVEILLE 8 [Oryza sativa Japonica Group]|BAF03982.1 Os01g0156000 [Oryza sativa Japonica Group]|BAG97899.1 unnamed protein product [Oryza sativa Japonica Group]|EEE53900.1 hypothetical protein OsJ_00436 [Oryza sativa Japonica Group]|BAS70482.1 Os01g0156000 [Oryza sativa Japonica Group]
LOC_Os01g06360.MSUv7.0	0	5	3	0	5	3	0	0.114306	0.0643111	0	0.105876	0.0704571	EEC69976.1	hypothetical protein OsI_00472 [Oryza sativa Indica Group]
LOC_Os01g06420.MSUv7.0	1	1	0	0	0	3	0.0823383	0.0852693	0	0	0	0.262795	BAD61433.1	hypothetical protein [Oryza sativa Japonica Group]|EAZ10614.1 hypothetical protein OsJ_00445 [Oryza sativa Japonica Group]|BAS70492.1 Os01g0157400 [Oryza sativa Japonica Group]
LOC_Os01g06430.MSUv7.0	3	0	0	0	2	1	0.190916	0	0	0	0.122087	0.0677042	BAD61434.1	hypothetical protein [Oryza sativa Japonica Group]|BAH90918.1 Os01g0157500 [Oryza sativa Japonica Group]
LOC_Os01g06440.MSUv7.0	5	6	2	14	30	23	0.1774	0.220458	0.0689079	0.548883	1.02099	0.868171	BAS70494.1	Os01g0157600, partial [Oryza sativa Japonica Group]
LOC_Os01g06450.MSUv7.0	44	31	36	29	23	34	1.38987	1.01408	1.10428	1.01225	0.696895	1.1426	XP_015621536.1	probable glucuronosyltransferase Os01g0157700 [Oryza sativa Japonica Group]
LOC_Os01g06454.MSUv7.0	47	75	98	55	61	51	3.1446	5.19661	6.36722	4.06629	3.91486	3.63021	XP_015621539.1	mitochondrial import inner membrane translocase subunit TIM14-1 [Oryza sativa Japonica Group]|BAD61437.1 putative DNAJ domain-containing; methylation-controlled J protein [Oryza sativa Japonica Group]|BAF03986.1 Os01g0157800 [Oryza sativa Japonica Group]|BAH00611.1 unnamed protein product [Oryza sativa Japonica Group]|BAS70496.1 Os01g0157800 [Oryza sativa Japonica Group]
LOC_Os01g06460.MSUv7.0	1178	1268	1161	1470	980	1200	49.8761	55.5978	47.7348	68.7754	39.8008	54.0533	XP_015621538.1	cell number regulator 8 [Oryza sativa Japonica Group]|BAB08185.1 unnamed protein product [Oryza sativa Japonica Group]|BAD61438.1 unknown protein [Oryza sativa Japonica Group]|BAF03987.1 Os01g0157900 [Oryza sativa Japonica Group]|BAG93085.1 unnamed protein product [Oryza sativa Japonica Group]|EEE53904.1 hypothetical protein OsJ_00450 [Oryza sativa Japonica Group]|BAS70497.1 Os01g0157900 [Oryza s…
LOC_Os01g06470.MSUv7.0	793	799	898	820	1143	964	27.2814	28.4663	30.0002	31.1727	37.7187	35.2829	XP_015619230.1	importin subunit alpha-2 [Oryza sativa Japonica Group]|Q9FYP9.1 RecName: Full=Importin subunit alpha-2|BAA31222.1 importin alpha [Oryza sativa Japonica Group]|BAB08186.1 unnamed protein product [Oryza sativa Japonica Group]|BAB64664.1 SRP1 protein homolog [Oryza sativa Japonica Group]|BAF03988.1 Os01g0158000 [Oryza sativa Japonica Group]|BAG95907.1 unnamed protein product [Oryza sativa Japonica G…
LOC_Os01g06490.MSUv7.0	222	255	330	303	161	247	6.55562	7.79815	9.46303	9.88716	4.56042	7.75982	XP_015619238.1	serine carboxypeptidase II-1 [Oryza sativa Japonica Group]|BAD61439.1 putative carboxypeptidase D [Oryza sativa Japonica Group]|BAF03990.1 Os01g0158200 [Oryza sativa Japonica Group]|EAZ10621.1 hypothetical protein OsJ_00453 [Oryza sativa Japonica Group]|BAG92359.1 unnamed protein product [Oryza sativa Japonica Group]|BAS70500.1 Os01g0158200 [Oryza sativa Japonica Group]
LOC_Os01g06500.MSUv7.0	576	429	858	399	82	302	31.1423	24.0202	45.0476	23.838	4.25266	17.3712	XP_015630186.1	lectin isoform X1 [Oryza sativa Japonica Group]|BAD61079.1 putative lectin 2 [Oryza sativa Japonica Group]|BAF03991.1 Os01g0158400 [Oryza sativa Japonica Group]|BAG88873.1 unnamed protein product [Oryza sativa Japonica Group]|BAS70501.1 Os01g0158400 [Oryza sativa Japonica Group]
LOC_Os01g06540.MSUv7.0	0	0	0	0	0	1	0	0	0	0	0	0.122406	BAB08194.1	unnamed protein product [Oryza sativa Japonica Group]
LOC_Os01g06550.MSUv7.0	1048	914	1117	709	1032	847	16.937	15.2972	17.5301	12.6616	15.9983	14.5631	BAB08195.2	unnamed protein product [Oryza sativa Japonica Group]
LOC_Os01g06560.MSUv7.0	23	15	15	23	41	24	0.687759	0.464505	0.435567	0.759983	1.17601	0.763507	BAG91889.1	unnamed protein product [Oryza sativa Japonica Group]|BAS70510.1 Os01g0159000 [Oryza sativa Japonica Group]
LOC_Os01g06580.MSUv7.0	121	98	158	50	4	40	5.33548	4.47512	6.76551	2.43627	0.169187	1.87647	BAF03996.1	Os01g0159200, partial [Oryza sativa Japonica Group]
LOC_Os01g06590.MSUv7.0	1367	3930	1473	1014	973	1574	24.782	73.7821	25.9314	20.313	16.9199	30.3575	XP_015620967.1	E3 ubiquitin-protein ligase MBR1 [Oryza sativa Japonica Group]|BAF03997.1 Os01g0159300 [Oryza sativa Japonica Group]|BAG93610.1 unnamed protein product [Oryza sativa Japonica Group]|AEP20518.1 zinc finger protein [Oryza sativa Japonica Group]|BAS70513.1 Os01g0159300 [Oryza sativa Japonica Group]
LOC_Os01g06600.MSUv7.0	2545	2610	2193	2535	2833	3144	62.3629	66.2322	52.1834	68.6411	66.589	81.9623	XP_015622170.1	acyl-coenzyme A oxidase 4, peroxisomal isoform X2 [Oryza sativa Japonica Group]|BAD61086.1 putative glutaryl-CoA dehydrogenase [Oryza sativa Japonica Group]|BAF03998.1 Os01g0159400 [Oryza sativa Japonica Group]|EAY72630.1 hypothetical protein OsI_00496 [Oryza sativa Indica Group]|EAZ10630.1 hypothetical protein OsJ_00462 [Oryza sativa Japonica Group]|BAG94650.1 unnamed protein product [Oryza sati…
LOC_Os01g06620.MSUv7.0	0	6	0	0	0	0	0	0.273987	0	0	0	0	BAB08204.1	unnamed protein product [Oryza sativa Japonica Group]|BAF03999.1 Os01g0159500 [Oryza sativa Japonica Group]|BAG91421.1 unnamed protein product [Oryza sativa Japonica Group]|EEE53910.1 hypothetical protein OsJ_00463 [Oryza sativa Japonica Group]
LOC_Os01g06630.MSUv7.0	0	1	0	0	0	0	0	0.062544	0	0	0	0	BAB08205.1	unnamed protein product [Oryza sativa Japonica Group]
LOC_Os01g06640.MSUv7.0	459	533	761	550	475	954	13.8204	16.6198	22.251	18.2995	13.7189	30.5598	XP_015623162.1	putative transcription factor bHLH107 [Oryza sativa Japonica Group]|BAB08206.1 unnamed protein product [Oryza sativa Japonica Group]|BAF04001.1 Os01g0159800 [Oryza sativa Japonica Group]|EEC69988.1 hypothetical protein OsI_00499 [Oryza sativa Indica Group]|EEE53912.1 hypothetical protein OsJ_00465 [Oryza sativa Japonica Group]
LOC_Os01g06660.MSUv7.0	469	502	657	428	432	490	10.5774	11.7247	14.3889	10.6664	9.3456	11.757	XP_015615261.1	pyruvate decarboxylase 2 [Oryza sativa Japonica Group]|BAA96769.1 putative pyruvate decarboxylase [Oryza sativa Japonica Group]|BAB08208.1 unnamed protein product [Oryza sativa Japonica Group]|BAF04002.1 Os01g0160100 [Oryza sativa Japonica Group]|EAZ10634.1 hypothetical protein OsJ_00466 [Oryza sativa Japonica Group]|BAS70518.1 Os01g0160100 [Oryza sativa Japonica Group]
LOC_Os01g06730.MSUv7.0	60	52	88	13	48	38	0.92058	0.826236	1.31114	0.220405	0.70643	0.620279	XP_015630998.1	receptor like protein 22 [Oryza sativa Japonica Group]
LOC_Os01g06790.MSUv7.0	16	18	15	1	12	21	0.279652	0.325808	0.254592	0.0193137	0.201186	0.390491	XP_025878732.1	receptor like protein 22-like [Oryza sativa Japonica Group]
LOC_Os01g06800.MSUv7.0	0	0	3	0	0	0	0	0	0.217223	0	0	0	EEC69991.1	hypothetical protein OsI_00505 [Oryza sativa Indica Group]
LOC_Os01g06836.MSUv7.0	5	14	21	4	11	13	0.166731	0.483465	0.680019	0.147392	0.35185	0.461194	EAZ10646.1	hypothetical protein OsJ_00477 [Oryza sativa Japonica Group]
LOC_Os01g06876.MSUv7.0	20	13	13	11	8	10	0.965188	0.649705	0.609229	0.586601	0.370331	0.513423	BAF04010.1	Os01g0162300, partial [Oryza sativa Japonica Group]|BAS70533.1 Os01g0162300, partial [Oryza sativa Japonica Group]
LOC_Os01g06882.MSUv7.0	8	15	10	3	12	7	0.438907	0.852244	0.532767	0.181874	0.631511	0.408577	BAS70534.1	Os01g0162400, partial [Oryza sativa Japonica Group]
LOC_Os01g06890.MSUv7.0	16	17	22	15	30	48	0.364317	0.400866	0.48645	0.377415	0.655238	1.16277	BAH90922.1	Os01g0162500, partial [Oryza sativa Japonica Group]
LOC_Os01g06920.MSUv7.0	0	0	7	6	3	0	0	0	0.104758	0.102177	0.0443477	0	XP_015624847.1	receptor-like protein 7 [Oryza sativa Japonica Group]|BAC00564.1 putative verticillium wilt disease resistance protein [Oryza sativa Japonica Group]|EAZ10653.1 hypothetical protein OsJ_00483 [Oryza sativa Japonica Group]
LOC_Os01g06960.MSUv7.0	0	0	5	0	0	0	0	0	0.406856	0	0	0	BAD68104.1	hypothetical protein [Oryza sativa Japonica Group]|BAS70542.1 Os01g0163300 [Oryza sativa Japonica Group]
LOC_Os01g06990.MSUv7.0	0	0	1	0	0	0	0	0	0.090219	0	0	0	XP_015636617.1	non-classical arabinogalactan protein 31 [Oryza sativa Japonica Group]|BAC00569.1 hypothetical protein [Oryza sativa Japonica Group]|EAZ10658.1 hypothetical protein OsJ_00488 [Oryza sativa Japonica Group]|BAS70547.1 Os01g0163600 [Oryza sativa Japonica Group]
LOC_Os01g07020.MSUv7.0	0	0	1	0	0	0	0	0	0.0878696	0	0	0	XP_015636645.1	non-classical arabinogalactan protein 30 [Oryza sativa Japonica Group]|BAC00573.1 hypothetical protein [Oryza sativa Japonica Group]|EAZ22472.1 hypothetical protein OsJ_06138 [Oryza sativa Japonica Group]|BAS70550.1 Os01g0164000 [Oryza sativa Japonica Group]
LOC_Os01g07030.MSUv7.0	0	1	6	0	0	0	0	0.0664722	0.373987	0	0	0	XP_015636656.1	non-classical arabinogalactan protein 30 [Oryza sativa Japonica Group]|EAZ10660.1 hypothetical protein OsJ_00490 [Oryza sativa Japonica Group]|BAS70551.1 Os01g0164075 [Oryza sativa Japonica Group]
LOC_Os01g07040.MSUv7.0	0	0	2	0	0	0	0	0	0.16649	0	0	0	XP_015644425.1	non-classical arabinogalactan protein 30 [Oryza sativa Japonica Group]|BAC00575.1 hypothetical protein [Oryza sativa Japonica Group]|EAZ10661.1 hypothetical protein OsJ_00491 [Oryza sativa Japonica Group]|BAS70552.1 Os01g0164100 [Oryza sativa Japonica Group]
LOC_Os01g07060.MSUv7.0	0	0	3	0	0	0	0	0	0.259553	0	0	0	XP_015642367.1	non-classical arabinogalactan protein 31 [Oryza sativa Japonica Group]|EAZ10663.1 hypothetical protein OsJ_00493 [Oryza sativa Japonica Group]|BAS70554.1 Os01g0164300 [Oryza sativa Japonica Group]
LOC_Os01g07070.MSUv7.0	809	885	1005	862	1065	936	15.7157	17.8041	18.9586	18.5038	19.8451	19.3444	BAF04015.1	Os01g0164400, partial [Oryza sativa Japonica Group]
LOC_Os01g07080.MSUv7.0	408	417	613	310	421	355	9.49331	10.0481	13.8508	7.97053	9.39632	8.78779	XP_015620894.1	DEAD-box ATP-dependent RNA helicase 18 [Oryza sativa Japonica Group]|Q761Z9.2 RecName: Full=DEAD-box ATP-dependent RNA helicase 18; AltName: Full=BRI1-KD-interacting protein 115; Short=BIP115|BAB64789.1 putative RNA helicase [Oryza sativa Japonica Group]|BAC00580.1 putative RNA helicase [Oryza sativa Japonica Group]|BAF04016.1 Os01g0164500 [Oryza sativa Japonica Group]|EAZ10665.1 hypothetical pro…
LOC_Os01g07090.MSUv7.0	57	52	79	42	60	49	2.12355	2.00624	2.85805	1.72904	2.14416	1.94213	XP_015626680.1	probable protein phosphatase 2C 1 isoform X1 [Oryza sativa Japonica Group]|Q942P9.1 RecName: Full=Probable protein phosphatase 2C 1; Short=OsPP2C01|BAB64790.1 putative senescence-associated protein [Oryza sativa Japonica Group]|BAC00581.1 putative senescence-associated protein [Oryza sativa Japonica Group]|BAF04017.1 Os01g0164600 [Oryza sativa Japonica Group]|EAZ10666.1 hypothetical protein OsJ_0…
LOC_Os01g07100.MSUv7.0	423	429	390	366	474	466	22.3372	23.4605	19.999	21.3569	24.0096	26.1799	BAH90923.1	Os01g0164700 [Oryza sativa Japonica Group]|BAS70558.1 Os01g0164700 [Oryza sativa Japonica Group]
LOC_Os01g07110.MSUv7.0	80	69	74	76	84	82	0.916398	0.818529	0.823154	0.962002	0.922978	0.999313	XP_015622733.1	protein BREAST CANCER SUSCEPTIBILITY 2 homolog B isoform X1 [Oryza sativa Japonica Group]|XP_015622741.1 protein BREAST CANCER SUSCEPTIBILITY 2 homolog B isoform X1 [Oryza sativa Japonica Group]
LOC_Os01g07120.MSUv7.0	400	408	425	337	305	496	5.38153	5.68456	5.55252	5.01007	3.93608	7.09939	XP_015621338.1	uncharacterized protein LOC4327135 [Oryza sativa Japonica Group]|BAD68290.1 unknown protein [Oryza sativa Japonica Group]|BAF04022.1 Os01g0165100 [Oryza sativa Japonica Group]|EAY72666.1 hypothetical protein OsI_00532 [Oryza sativa Indica Group]|EAZ10670.1 hypothetical protein OsJ_00500 [Oryza sativa Japonica Group]|BAG86963.1 unnamed protein product [Oryza sativa Japonica Group]|BAS70562.1 Os01g…
LOC_Os01g07130.MSUv7.0	6	8	1	1	6	4	0.182878	0.252517	0.0295982	0.0336804	0.17542	0.129707	XP_015621338.1	uncharacterized protein LOC4327135 [Oryza sativa Japonica Group]|BAD68290.1 unknown protein [Oryza sativa Japonica Group]|BAF04022.1 Os01g0165100 [Oryza sativa Japonica Group]|EAY72666.1 hypothetical protein OsI_00532 [Oryza sativa Indica Group]|EAZ10670.1 hypothetical protein OsJ_00500 [Oryza sativa Japonica Group]|BAG86963.1 unnamed protein product [Oryza sativa Japonica Group]|BAS70562.1 Os01g…
LOC_Os01g07140.MSUv7.0	46	35	30	15	27	32	0.860254	0.67784	0.54481	0.309976	0.48434	0.636667	EAZ10671.1	hypothetical protein OsJ_00501 [Oryza sativa Japonica Group]
LOC_Os01g07150.MSUv7.0	6	4	0	0	3	5	0.510148	0.352205	0	0	0.244672	0.452281	XP_015644624.1	uncharacterized protein LOC107277399 [Oryza sativa Japonica Group]|BAB64796.1 unknown protein [Oryza sativa Japonica Group]|EAY72670.1 hypothetical protein OsI_00536 [Oryza sativa Indica Group]|EAZ10672.1 hypothetical protein OsJ_00502 [Oryza sativa Japonica Group]|BAS70565.1 Os01g0165600 [Oryza sativa Japonica Group]
LOC_Os01g07170.MSUv7.0	669	530	704	514	575	592	21.0177	17.2435	21.4777	17.8439	17.3279	19.7868	EEE53928.1	hypothetical protein OsJ_00505 [Oryza sativa Japonica Group]
LOC_Os01g07200.MSUv7.0	540	586	567	506	435	440	18.7758	21.1005	19.1444	19.4412	14.5081	16.2761	XP_015621984.1	probable staphylococcal-like nuclease CAN1 [Oryza sativa Japonica Group]|Q942N7.1 RecName: Full=Probable staphylococcal-like nuclease CAN1; AltName: Full=Calcium-dependent nuclease 1; Short=Ca(2+)-dependent nuclease 1|BAB64802.1 putative Ca(2+)-dependent nuclease [Oryza sativa Japonica Group]|BAF04026.1 Os01g0166100 [Oryza sativa Japonica Group]|EAZ10677.1 hypothetical protein OsJ_00507 [Oryza sa…
LOC_Os01g07212.MSUv7.0	435	309	397	380	482	362	13.617	10.0171	12.0681	13.1445	14.4729	12.0557	XP_015621985.2	uncharacterized protein LOC107276328 isoform X1 [Oryza sativa Japonica Group]
LOC_Os01g07240.MSUv7.0	28	34	17	18	24	24	1.09892	1.3819	0.647906	0.780635	0.903518	1.0021	XP_015634307.1	uncharacterized protein LOC4327143 [Oryza sativa Japonica Group]|BAB39898.1 P0028E10.1 [Oryza sativa Japonica Group]|BAB64804.1 unknown protein [Oryza sativa Japonica Group]|BAF04030.1 Os01g0166500 [Oryza sativa Japonica Group]|BAG95193.1 unnamed protein product [Oryza sativa Japonica Group]|BAH00786.1 unnamed protein product [Oryza sativa Japonica Group]|BAS70574.1 Os01g0166500 [Oryza sativa Jap…
LOC_Os01g07250.MSUv7.0	46	38	57	28	33	22	1.3931	1.19179	1.67631	0.937024	0.958642	0.708828	XP_015620682.1	proactivator polypeptide-like 1 [Oryza sativa Japonica Group]|XP_025878792.1 proactivator polypeptide-like 1 [Oryza sativa Japonica Group]|BAD68299.1 unknown protein [Oryza sativa Japonica Group]|EAZ10680.1 hypothetical protein OsJ_00511 [Oryza sativa Japonica Group]|BAG90610.1 unnamed protein product [Oryza sativa Japonica Group]|BAF04031.2 Os01g0166700 [Oryza sativa Japonica Group]|BAS70575.1 O…
LOC_Os01g07260.MSUv7.0	93	77	90	101	65	79	2.23785	1.9188	2.10303	2.68557	1.5003	2.0224	EAY72680.1	hypothetical protein OsI_00547 [Oryza sativa Indica Group]
LOC_Os01g07280.MSUv7.0	267	264	257	198	255	184	4.71412	4.82707	4.40634	3.86298	4.31864	3.45621	EEC70005.1	hypothetical protein OsI_00548 [Oryza sativa Indica Group]
LOC_Os01g07300.MSUv7.0	265	227	275	154	137	166	9.53198	8.45578	9.60562	6.12105	4.72689	6.35242	XP_015628991.1	protein synthesis inhibitor II isoform X1 [Oryza sativa Japonica Group]
LOC_Os01g07310.MSUv7.0	6042	5279	4888	3900	3443	2644	140.899	127.488	110.692	100.499	77.0164	65.5969	XP_015619664.1	UDP-xylose transporter 3 [Oryza sativa Japonica Group]|BAB39904.1 P0028E10.8 [Oryza sativa Japonica Group]|BAB64810.1 putative glucose-6-phosphate/phosphate- tranlocator [Oryza sativa Japonica Group]|BAB92494.1 putative glucose-6-phosphate/phosphate- tranlocator [Oryza sativa Japonica Group]|BAF04035.1 Os01g0167500 [Oryza sativa Japonica Group]|BAG99589.1 unnamed protein product [Oryza sativa Jap…
LOC_Os01g07320.MSUv7.0	52	48	39	48	29	24	4.40691	4.21272	3.2096	4.4951	2.35747	2.16389	BAS70582.1	Os01g0167600 [Oryza sativa Japonica Group]
LOC_Os01g07330.MSUv7.0	84	42	66	34	29	64	1.09947	0.569304	0.838887	0.491758	0.3641	0.891206	BAS70583.1	Os01g0167700 [Oryza sativa Japonica Group]
LOC_Os01g07340.MSUv7.0	27	24	24	37	23	23	0.745757	0.686492	0.643725	1.12928	0.609368	0.675858	XP_015640021.1	pentatricopeptide repeat-containing protein At5g66631 [Oryza sativa Japonica Group]|BAD68304.1 hypothetical protein [Oryza sativa Japonica Group]|BAD68308.1 hypothetical protein [Oryza sativa Japonica Group]|BAH90927.1 Os01g0167750 [Oryza sativa Japonica Group]|BAS70584.1 Os01g0167750 [Oryza sativa Japonica Group]
LOC_Os01g07360.MSUv7.0	139	168	212	113	78	98	2.83883	3.55324	4.20452	2.55018	1.52805	2.12934	XP_015622367.1	protein NETWORKED 4A [Oryza sativa Japonica Group]|XP_015622375.1 protein NETWORKED 4A [Oryza sativa Japonica Group]|XP_025878822.1 protein NETWORKED 4A [Oryza sativa Japonica Group]|BAB39910.1 P0028E10.14 [Oryza sativa Japonica Group]|BAB64816.1 kinase interacting protein 1 -like [Oryza sativa Japonica Group]|BAB92500.1 kinase interacting protein 1 -like [Oryza sativa Japonica Group]|BAF04038.1 …
LOC_Os01g07370.MSUv7.0	1164	1259	932	962	628	1161	25.1213	28.1388	19.5326	22.942	13.0007	26.6572	XP_015620934.1	protein NETWORKED 4B [Oryza sativa Japonica Group]|XP_015620935.1 protein NETWORKED 4B [Oryza sativa Japonica Group]|BAB39912.1 P0028E10.16 [Oryza sativa Japonica Group]|BAB64818.1 kinase interacting protein 1 -like [Oryza sativa Japonica Group]|BAB92502.1 kinase interacting protein 1 -like [Oryza sativa Japonica Group]|BAF04040.1 Os01g0168100 [Oryza sativa Japonica Group]|BAS70588.1 Os01g0168100…
LOC_Os01g07376.MSUv7.0	92	114	181	79	78	85	4.91297	6.30451	9.3862	4.66177	3.99547	4.82912	XP_015625017.1	thioredoxin H4-1 [Oryza sativa Japonica Group]|Q9AS75.1 RecName: Full=Thioredoxin H4-1; Short=OsTrxh4-1; AltName: Full=OsTrx01|BAB39913.1 thioredoxin-like protein [Oryza sativa Japonica Group]|BAB64819.1 putative thioredoxin-like protein [Oryza sativa Japonica Group]|BAB92503.1 putative thioredoxin-like protein [Oryza sativa Japonica Group]|BAF04041.1 Os01g0168200 [Oryza sativa Japonica Group]|BA…
LOC_Os01g07382.MSUv7.0	259	296	351	349	276	235	8.9339	10.5736	11.7572	13.3025	9.13205	8.62388	XP_020183714.1	uncharacterized protein LOC109769375 [Aegilops tauschii subsp. tauschii]
LOC_Os01g07390.MSUv7.0	1139	1120	1154	919	1048	972	29.8917	30.4393	29.4095	26.6508	26.3819	27.1385	XP_015621569.1	RING finger and transmembrane domain-containing protein 2 [Oryza sativa Japonica Group]|BAD68310.1 unknown protein [Oryza sativa Japonica Group]|BAF04043.1 Os01g0168400 [Oryza sativa Japonica Group]|BAS70593.1 Os01g0168400 [Oryza sativa Japonica Group]
LOC_Os01g07400.MSUv7.0	439	402	404	308	259	389	10.6126	10.0641	9.48405	8.22765	6.00585	10.0046	XP_015620970.1	autophagy-related protein 18d [Oryza sativa Japonica Group]|XP_015620972.1 autophagy-related protein 18d [Oryza sativa Japonica Group]|XP_015620973.1 autophagy-related protein 18d [Oryza sativa Japonica Group]|BAD68311.1 unknown protein [Oryza sativa Japonica Group]|BAF04044.1 Os01g0168500 [Oryza sativa Japonica Group]|BAG93084.1 unnamed protein product [Oryza sativa Japonica Group]|EEC70011.1 hy…
LOC_Os01g07410.MSUv7.0	429	397	476	331	232	210	10.2379	9.81147	11.031	8.72869	5.31079	5.3317	BAF04045.2	Os01g0168600 [Oryza sativa Japonica Group]
LOC_Os01g07420.MSUv7.0	328	264	396	260	89	145	11.2544	9.38086	13.1947	9.85801	2.92925	5.29309	XP_015625889.1	uncharacterized protein LOC4325195 [Oryza sativa Japonica Group]|BAB39918.1 P0028E10.22 [Oryza sativa Japonica Group]|BAB92508.1 hydrolase -like protein [Oryza sativa Japonica Group]|BAF04046.1 Os01g0168800 [Oryza sativa Japonica Group]|BAS70596.1 Os01g0168800 [Oryza sativa Japonica Group]
LOC_Os01g07430.MSUv7.0	2	13	8	2	8	2	0.142405	0.958581	0.553146	0.157359	0.54639	0.151502	EAZ10696.1	hypothetical protein OsJ_00530 [Oryza sativa Japonica Group]
LOC_Os01g07450.MSUv7.0	18	15	23	11	1	7	1.19816	1.03401	1.48671	0.809104	0.0638501	0.495719	BAB39921.1	putative transcription factor (myb) [Oryza sativa Japonica Group]|BAB92511.1 putative MybHv33 [Oryza sativa Japonica Group]
LOC_Os01g07460.MSUv7.0	0	0	1	0	0	3	0	0	0.181408	0	0	0.596233	LOC_Os01g07460.MSUv7.0	-
LOC_Os01g07480.MSUv7.0	103	94	199	92	87	71	3.71771	3.51364	6.97504	3.66939	3.01214	2.72641	XP_015648006.1	protein LATERAL ORGAN BOUNDARIES [Oryza sativa Japonica Group]|XP_025878847.1 protein LATERAL ORGAN BOUNDARIES [Oryza sativa Japonica Group]|BAB39926.1 P0028E10.30 [Oryza sativa Japonica Group]|BAB92516.1 putative LOB domain protein 25 [Oryza sativa Japonica Group]|BAD88527.1 LOB domain protein [Oryza sativa Japonica Group]|BAF04047.1 Os01g0169400 [Oryza sativa Japonica Group]|BAG97281.1 unnamed …
LOC_Os01g07490.MSUv7.0	1959	1899	1888	1741	2833	2383	17.5677	17.6358	16.4413	17.2523	24.3694	22.7351	BAS70603.1	Os01g0169500, partial [Oryza sativa Japonica Group]
LOC_Os01g07500.MSUv7.0	553	372	948	798	368	458	14.0803	9.80893	23.4397	22.4522	8.9878	12.4064	EAY72702.1	hypothetical protein OsI_00569 [Oryza sativa Indica Group]
LOC_Os01g07520.MSUv7.0	1622	1406	1588	1389	1758	1404	37.5895	33.7437	35.7373	35.5702	39.0799	34.616	XP_015648026.1	class E vacuolar protein-sorting machinery protein HSE1 [Oryza sativa Japonica Group]|BAD68319.1 vegetative cell wall protein gp1 -like [Oryza sativa Japonica Group]|EAY72703.1 hypothetical protein OsI_00570 [Oryza sativa Indica Group]|EAZ10703.1 hypothetical protein OsJ_00537 [Oryza sativa Japonica Group]|BAH00414.1 unnamed protein product [Oryza sativa Japonica Group]|BAF04050.2 Os01g0169900 [O…
LOC_Os01g07530.MSUv7.0	590	483	200	821	131	335	10.4702	8.87646	3.44657	16.0995	2.22993	6.3247	XP_015621501.1	galactinol--sucrose galactosyltransferase [Oryza sativa Japonica Group]
LOC_Os01g07540.MSUv7.0	185	169	181	130	194	137	6.17696	5.8436	5.86863	4.79639	6.2133	4.8665	XP_015624591.1	SUPPRESSOR OF ABI3-5 isoform X1 [Oryza sativa Japonica Group]|XP_015624601.1 SUPPRESSOR OF ABI3-5 isoform X1 [Oryza sativa Japonica Group]|BAD68248.1 hypothetical protein [Oryza sativa Japonica Group]
LOC_Os01g07550.MSUv7.0	3	0	2	1	0	2	0.383236	0	0.248102	0.141161	0	0.271812	BAD46480.1	hypothetical protein [Oryza sativa Japonica Group]
LOC_Os01g07560.MSUv7.0	201	184	214	237	164	149	2.60212	2.46684	2.6903	3.39038	2.03654	2.05216	XP_015647739.1	LRR receptor-like serine/threonine-protein kinase [Oryza sativa Japonica Group]|BAD68249.1 putative receptor-like protein kinase INRPK1 [Oryza sativa Japonica Group]|EAZ10706.1 hypothetical protein OsJ_00540 [Oryza sativa Japonica Group]|BAH01025.1 unnamed protein product [Oryza sativa Japonica Group]|BAS70611.1 Os01g0170300 [Oryza sativa Japonica Group]
LOC_Os01g07570.MSUv7.0	161	163	143	173	82	110	4.27476	4.48192	3.68703	5.07574	2.08842	3.10722	BAD68250.1	putative ZmEBE-1 protein [Oryza sativa Japonica Group]|BAF04055.1 Os01g0170500 [Oryza sativa Japonica Group]|BAS70612.1 Os01g0170500 [Oryza sativa Japonica Group]
LOC_Os01g07590.MSUv7.0	497	599	534	695	1196	985	18.8117	23.4795	19.6277	29.0686	43.4231	39.6645	XP_015622195.1	uncharacterized protein LOC4327636 [Oryza sativa Japonica Group]|XP_015622196.1 uncharacterized protein LOC4327636 [Oryza sativa Japonica Group]|BAS70613.1 Os01g0170600 [Oryza sativa Japonica Group]
LOC_Os01g07600.MSUv7.0	12	12	20	12	3	12	0.269587	0.279183	0.436318	0.297898	0.0646483	0.286809	XP_015622192.1	uncharacterized protein LOC4327637 isoform X1 [Oryza sativa Japonica Group]
LOC_Os01g07610.MSUv7.0	268	172	236	209	338	206	7.30173	4.853	6.24393	6.29223	8.83335	5.97106	BAS70617.1	Os01g0170800, partial [Oryza sativa Japonica Group]
LOC_Os01g07620.MSUv7.0	4	6	11	7	2	4	0.207443	0.322242	0.553972	0.401149	0.0994919	0.220695	XP_015621267.1	uncharacterized protein LOC4327639 [Oryza sativa Japonica Group]|BAB64775.1 unknown protein [Oryza sativa Japonica Group]|BAF04059.1 Os01g0170900 [Oryza sativa Japonica Group]|EAY72711.1 hypothetical protein OsI_00577 [Oryza sativa Indica Group]|EAZ10712.1 hypothetical protein OsJ_00546 [Oryza sativa Japonica Group]|BAF91603.1 CLE family OsCLE101 protein [Oryza sativa Japonica Group]|BAG99149.1 u…
LOC_Os01g07630.MSUv7.0	312	188	293	352	301	286	6.46837	4.03635	5.8988	8.06401	5.98584	6.30812	XP_015621261.1	protein NSP-INTERACTING KINASE 3 [Oryza sativa Japonica Group]|BAD68255.1 putative brassinosteroid insensitive 1-associated receptor kinase 1 [Oryza sativa Japonica Group]|BAE96298.1 SERK like protein kinase [Oryza sativa Japonica Group]|EAZ10713.1 hypothetical protein OsJ_00547 [Oryza sativa Japonica Group]|BAG94399.1 unnamed protein product [Oryza sativa Japonica Group]|EEC70017.1 hypothetical …
LOC_Os01g07640.MSUv7.0	6	7	14	44	55	77	0.194478	0.234968	0.440659	1.57594	1.71002	2.65524	BAD68257.1	putative ankyrin repeat protein E4_8 [Oryza sativa Japonica Group]
LOC_Os01g07650.MSUv7.0	1	0	0	1	0	0	0.234775	0	0	0.25943	0	0	BAS70622.1	Os01g0171300 [Oryza sativa Japonica Group]
LOC_Os01g07660.MSUv7.0	7	1	0	0	3	3	0.214992	0.0318064	0	0	0.0883818	0.0980254	EEC70018.1	hypothetical protein OsI_00579 [Oryza sativa Indica Group]
LOC_Os01g07700.MSUv7.0	232	219	280	183	188	171	6.79319	6.6408	7.96158	5.92113	5.28033	5.32691	XP_015621554.1	uncharacterized protein LOC4327642 [Oryza sativa Japonica Group]|XP_015621561.1 uncharacterized protein LOC4327642 [Oryza sativa Japonica Group]|BAG90698.1 unnamed protein product [Oryza sativa Japonica Group]|BAF04062.2 Os01g0171800 [Oryza sativa Japonica Group]|BAS70628.1 Os01g0171800 [Oryza sativa Japonica Group]
LOC_Os01g07710.MSUv7.0	0	0	0	0	1	0	0	0	0	0	0.0426212	0	BAB64782.1	hypothetical protein [Oryza sativa Japonica Group]|BAS70629.1 Os01g0171900 [Oryza sativa Japonica Group]
LOC_Os01g07720.MSUv7.0	847	712	877	676	615	567	20.7941	18.102	20.9079	18.3388	14.4827	14.8092	XP_025878911.1	dol-P-Man:Man(5)GlcNAc(2)-PP-Dol alpha-1,3-mannosyltransferase isoform X1 [Oryza sativa Japonica Group]
LOC_Os01g07730.MSUv7.0	46	56	177	107	58	79	1.45129	1.82968	5.42281	3.73033	1.75526	2.65165	XP_015621423.1	phosphoenolpyruvate/phosphate translocator 3, chloroplastic [Oryza sativa Japonica Group]|XP_015621424.1 phosphoenolpyruvate/phosphate translocator 3, chloroplastic [Oryza sativa Japonica Group]|Q5VQL3.1 RecName: Full=Phosphoenolpyruvate/phosphate translocator 3, chloroplastic; Short=OsPPT3; Flags: Precursor|BAD68262.1 putative glucose-6-phosphate/phosphate- translocator precursor [Oryza sativa J…
LOC_Os01g07740.MSUv7.0	513	446	531	482	422	425	9.15046	8.23855	9.19762	9.50037	7.22031	8.06507	XP_015621421.1	DEAD-box ATP-dependent RNA helicase 14 isoform X2 [Oryza sativa Japonica Group]|Q5VQL1.1 RecName: Full=DEAD-box ATP-dependent RNA helicase 14|BAD68264.1 putative p68 RNA helicase [Oryza sativa Japonica Group]|EEE53957.1 hypothetical protein OsJ_00557 [Oryza sativa Japonica Group]|ACS44654.1 ATP-dependent RNA helicase DB10 [Oryza sativa Japonica Group]|ACS44655.1 ATP-dependent RNA helicase DB10 [O…
LOC_Os01g07750.MSUv7.0	613	540	597	541	436	534	29.6654	27.0629	28.0556	28.9304	20.2392	27.4932	XP_015627121.1	uncharacterized protein LOC4327646 [Oryza sativa Japonica Group]|BAB64786.1 unknown protein [Oryza sativa Japonica Group]|BAF04066.1 Os01g0172300 [Oryza sativa Japonica Group]|BAG97578.1 unnamed protein product [Oryza sativa Japonica Group]|EEE53958.1 hypothetical protein OsJ_00558 [Oryza sativa Japonica Group]|BAS70633.1 Os01g0172300 [Oryza sativa Japonica Group]
LOC_Os01g07760.MSUv7.0	8771	7690	6929	13116	18555	13406	117.007	106.238	89.7611	193.344	237.433	190.263	XP_015646609.1	phospholipase D alpha 1 [Oryza sativa Japonica Group]|Q43007.2 RecName: Full=Phospholipase D alpha 1; Short=PLD alpha 1; AltName: Full=Choline phosphatase 1; AltName: Full=Phosphatidylcholine-hydrolyzing phospholipase D 1; Flags: Precursor|BAF04067.1 Os01g0172400 [Oryza sativa Japonica Group]|EEE53959.1 hypothetical protein OsJ_00559 [Oryza sativa Japonica Group]|BAS70634.1 Os01g0172400 [Oryza sa…
LOC_Os01g07770.MSUv7.0	825	881	1250	304	417	394	44.7908	49.5337	65.9022	18.2379	21.7164	22.7575	BAS70639.1	Os01g0172600, partial [Oryza sativa Japonica Group]
LOC_Os01g07780.MSUv7.0	231	233	195	201	225	203	12.0398	12.5763	9.86951	11.5763	11.2488	11.2563	XP_015646660.1	embryo-specific protein ATS3A [Oryza sativa Japonica Group]|BAB62547.1 unknown protein [Oryza sativa Japonica Group]|BAF04069.1 Os01g0172800 [Oryza sativa Japonica Group]|EAZ10726.1 hypothetical protein OsJ_00562 [Oryza sativa Japonica Group]|BAG90341.1 unnamed protein product [Oryza sativa Japonica Group]|BAS70641.1 Os01g0172800 [Oryza sativa Japonica Group]
LOC_Os01g07800.MSUv7.0	48	27	42	39	23	41	0.68504	0.399052	0.582076	0.615046	0.314862	0.622519	BAD68111.1	putative polygalacturonase [Oryza sativa Japonica Group]
LOC_Os01g07810.MSUv7.0	528	538	713	520	412	578	16.935	17.87	22.2074	18.4299	12.6756	19.723	XP_015646677.1	uncharacterized protein At2g34160 isoform X2 [Oryza sativa Japonica Group]
LOC_Os01g07850.MSUv7.0	16	86	34	30	20	6	0.81677	4.54642	1.68544	1.69227	0.979327	0.325855	XP_015643722.1	uncharacterized protein LOC4327121 [Oryza sativa Japonica Group]|BAB62552.1 hypothetical protein [Oryza sativa Japonica Group]|BAF04072.1 Os01g0173600 [Oryza sativa Japonica Group]|BAS70647.1 Os01g0173600 [Oryza sativa Japonica Group]
LOC_Os01g07870.MSUv7.0	2067	2508	2961	3748	3905	2856	19.6915	24.7433	27.3926	39.4554	35.6844	28.9461	XP_015617486.1	ABC transporter C family member 3 [Oryza sativa Japonica Group]|BAF04073.1 Os01g0173900 [Oryza sativa Japonica Group]|BAS70650.1 Os01g0173900 [Oryza sativa Japonica Group]
LOC_Os01g07880.MSUv7.0	58	126	79	95	63	65	4.01457	9.03175	5.30998	7.26611	4.18282	4.7865	XP_015617496.1	transcription factor HY5 [Oryza sativa Japonica Group]|BAF04074.1 Os01g0174000 [Oryza sativa Japonica Group]|EAZ10732.1 hypothetical protein OsJ_00568 [Oryza sativa Japonica Group]
LOC_Os01g07890.MSUv7.0	337	276	329	246	476	277	24.094	20.4352	22.8417	19.4348	32.644	21.0694	XP_025878954.1	uncharacterized protein At1g15400-like [Oryza sativa Japonica Group]|BAD68117.1 unknown protein [Oryza sativa Japonica Group]|BAF04075.1 Os01g0174100 [Oryza sativa Japonica Group]|EAZ10733.1 hypothetical protein OsJ_00569 [Oryza sativa Japonica Group]|BAH00028.1 unnamed protein product [Oryza sativa Japonica Group]|BAS70652.1 Os01g0174100 [Oryza sativa Japonica Group]
LOC_Os01g07910.MSUv7.0	538	649	735	373	451	415	19.733	24.6517	26.1791	15.1178	15.8674	16.194	EAY72732.1	hypothetical protein OsI_00597 [Oryza sativa Indica Group]
LOC_Os01g07920.MSUv7.0	131	107	143	117	96	90	5.64276	4.77304	5.98152	5.56896	3.96652	4.12436	XP_015622130.1	probable prolyl 4-hydroxylase 6 isoform X2 [Oryza sativa Japonica Group]
LOC_Os01g07930.MSUv7.0	0	0	3	0	0	1	0	0	0.125279	0	0	0.0457506	XP_015622143.1	zinc finger CCCH domain-containing protein 1 [Oryza sativa Japonica Group]|Q5VR07.1 RecName: Full=Zinc finger CCCH domain-containing protein 1; Short=OsC3H1|BAD68121.1 unknown protein [Oryza sativa Japonica Group]|BAF04079.1 Os01g0174600 [Oryza sativa Japonica Group]|BAG98115.1 unnamed protein product [Oryza sativa Japonica Group]|BAS70658.1 Os01g0174600 [Oryza sativa Japonica Group]
LOC_Os01g07940.MSUv7.0	126	79	128	136	138	78	2.58244	1.67678	2.54756	3.08011	2.71304	1.70078	XP_015621543.1	protein kinase PINOID 2 [Oryza sativa Japonica Group]|XP_025878968.1 protein kinase PINOID 2 [Oryza sativa Japonica Group]|XP_025878970.1 protein kinase PINOID 2 [Oryza sativa Japonica Group]|XP_025878972.1 protein kinase PINOID 2 [Oryza sativa Japonica Group]|XP_025878978.1 protein kinase PINOID 2 [Oryza sativa Japonica Group]|XP_025878979.1 protein kinase PINOID 2 [Oryza sativa Japonica Group]|…
LOC_Os01g07950.MSUv7.0	230	248	228	222	285	273	11.6839	13.0467	11.2473	12.4618	13.8874	14.7542	EAY72734.1	hypothetical protein OsI_00599 [Oryza sativa Indica Group]
LOC_Os01g07960.MSUv7.0	1335	1180	1494	1567	1845	1650	34.8774	31.9253	37.9026	45.2376	46.2357	45.8607	EEE53965.1	hypothetical protein OsJ_00575 [Oryza sativa Japonica Group]|BAS70662.1 Os01g0175000 [Oryza sativa Japonica Group]
LOC_Os01g07970.MSUv7.0	533	559	379	499	226	654	27.3695	29.7264	18.8988	28.3144	11.1318	35.7282	XP_015626427.1	protein THYLAKOID RHODANESE-LIKE, chloroplastic-like [Oryza sativa Japonica Group]|BAD68125.1 unknown protein [Oryza sativa Japonica Group]|BAF04083.1 Os01g0175100 [Oryza sativa Japonica Group]|BAG92413.1 unnamed protein product [Oryza sativa Japonica Group]|BAS70664.1 Os01g0175100 [Oryza sativa Japonica Group]
LOC_Os01g07980.MSUv7.0	405	419	503	367	415	337	24.9511	26.7325	30.0925	24.9844	24.5246	22.0881	EAY72742.1	hypothetical protein OsI_00609 [Oryza sativa Indica Group]
LOC_Os01g07990.MSUv7.0	21	4	10	1	13	10	0.255491	0.0503973	0.118144	0.0134439	0.151711	0.129434	BAD68127.1	helicase-like protein [Oryza sativa Japonica Group]
LOC_Os01g08000.MSUv7.0	120	124	127	50	107	118	4.73103	5.06275	4.8622	2.17827	4.04647	4.94937	EAZ10741.1	hypothetical protein OsJ_00578 [Oryza sativa Japonica Group]
LOC_Os01g08010.MSUv7.0	70	44	53	69	109	59	1.59948	1.04118	1.17601	1.7422	2.38905	1.43425	XP_015621248.1	uncharacterized protein LOC4326214 [Oryza sativa Japonica Group]|BAD68129.1 unknown protein [Oryza sativa Japonica Group]|BAF04087.1 Os01g0175500 [Oryza sativa Japonica Group]|BAG93391.1 unnamed protein product [Oryza sativa Japonica Group]|BAH00403.1 unnamed protein product [Oryza sativa Japonica Group]|EEE53966.1 hypothetical protein OsJ_00579 [Oryza sativa Japonica Group]|BAS70666.1 Os01g01755…
LOC_Os01g08020.MSUv7.0	0	2	4	0	0	0	0	0.0444242	0.0833134	0	0	0	BAD67808.1	hypothetical protein [Oryza sativa Japonica Group]
LOC_Os01g08070.MSUv7.0	0	0	0	0	5	0	0	0	0	0	0.164024	0	ABA97005.1	transposon protein, putative, CACTA, En/Spm sub-class [Oryza sativa Japonica Group]
LOC_Os01g08090.MSUv7.0	646	809	885	364	444	505	18.3686	23.8222	24.4367	11.437	12.11	15.2767	XP_015613320.1	UDP-glycosyltransferase 73C6 [Oryza sativa Japonica Group]|BAB17059.1 putative UDP-glucose: flavonoid 7-O-glucosyltransferase [Oryza sativa Japonica Group]|BAF04091.1 Os01g0176000 [Oryza sativa Japonica Group]|EAZ10746.1 hypothetical protein OsJ_00583 [Oryza sativa Japonica Group]|BAS70675.1 Os01g0176000 [Oryza sativa Japonica Group]
LOC_Os01g08100.MSUv7.0	107	108	104	64	68	61	3.70309	3.87075	3.49518	2.44753	2.25739	2.24597	XP_015613332.1	UDP-glycosyltransferase 73C6 [Oryza sativa Japonica Group]|BAB17061.1 putative UDP-glucose: flavonoid 7-O-glucosyltransferase [Oryza sativa Japonica Group]|AAT45075.1 glucosyl transferase [Oryza sativa Japonica Group]|BAF04093.1 Os01g0176200 [Oryza sativa Japonica Group]|BAG89079.1 unnamed protein product [Oryza sativa Japonica Group]|BAG95507.1 unnamed protein product [Oryza sativa Japonica Grou…
LOC_Os01g08110.MSUv7.0	86	97	115	41	65	124	2.21678	2.58933	2.87858	1.16782	1.60715	3.40048	XP_015613332.1	UDP-glycosyltransferase 73C6 [Oryza sativa Japonica Group]|BAB17061.1 putative UDP-glucose: flavonoid 7-O-glucosyltransferase [Oryza sativa Japonica Group]|AAT45075.1 glucosyl transferase [Oryza sativa Japonica Group]|BAF04093.1 Os01g0176200 [Oryza sativa Japonica Group]|BAG89079.1 unnamed protein product [Oryza sativa Japonica Group]|BAG95507.1 unnamed protein product [Oryza sativa Japonica Grou…
LOC_Os01g08120.MSUv7.0	51	33	35	28	58	29	1.33039	0.891487	0.886612	0.807116	1.4513	0.804826	XP_015613248.1	pentatricopeptide repeat-containing protein At3g62890 [Oryza sativa Japonica Group]|XP_015613256.1 pentatricopeptide repeat-containing protein At3g62890 [Oryza sativa Japonica Group]|XP_015613263.1 pentatricopeptide repeat-containing protein At3g62890 [Oryza sativa Japonica Group]|XP_015613270.1 pentatricopeptide repeat-containing protein At3g62890 [Oryza sativa Japonica Group]|XP_015613278.1 pen…
LOC_Os01g08130.MSUv7.0	30	9	15	38	54	32	1.52696	0.474394	0.7414	2.13726	2.63644	1.7328	BAD67811.1	non-phototropic hypocotyl 3 -like [Oryza sativa Japonica Group]
LOC_Os01g08140.MSUv7.0	19	28	42	55	85	43	1.66714	2.5443	3.57869	5.33273	7.15412	4.01404	BAF04095.1	Os01g0176400, partial [Oryza sativa Japonica Group]|BAS70681.1 Os01g0176400, partial [Oryza sativa Japonica Group]
LOC_Os01g08150.MSUv7.0	41	37	58	45	24	54	0.760743	0.710962	1.04505	0.922644	0.427153	1.06596	XP_015622610.1	uncharacterized protein LOC4326223 [Oryza sativa Japonica Group]|BAD67812.1 unknown protein [Oryza sativa Japonica Group]|BAF04096.1 Os01g0176500 [Oryza sativa Japonica Group]|BAS70682.1 Os01g0176500 [Oryza sativa Japonica Group]
LOC_Os01g08160.MSUv7.0	194	114	262	72	116	115	4.85188	2.95259	6.36304	1.9898	2.78281	3.05984	XP_015631343.1	transcription factor NIGTH1-like isoform X1 [Oryza sativa Japonica Group]|Q5VRW2.2 RecName: Full=Transcription factor NIGTH1; AltName: Full=MYB-domain transcription factor NIGT1 homolog 1
LOC_Os01g08170.MSUv7.0	17	14	16	16	14	41	0.24585	0.209672	0.224696	0.255687	0.194208	0.63081	XP_015631672.1	uncharacterized protein LOC9270565 [Oryza sativa Japonica Group]|BAD67815.1 hypothetical protein [Oryza sativa Japonica Group]|BAH90932.1 Os01g0176800 [Oryza sativa Japonica Group]|BAS70686.1 Os01g0176800 [Oryza sativa Japonica Group]
LOC_Os01g08190.MSUv7.0	10	23	19	29	16	14	0.124421	0.296356	0.229564	0.398714	0.190956	0.185318	EEE53974.1	hypothetical protein OsJ_00592 [Oryza sativa Japonica Group]
LOC_Os01g08200.MSUv7.0	1484	1379	1504	1392	1747	1429	26.2725	25.2827	25.8566	27.2317	29.6673	26.915	XP_015699262.1	PREDICTED: ubiquitin carboxyl-terminal hydrolase 14 isoform X2 [Oryza brachyantha]
LOC_Os01g08220.MSUv7.0	44	46	136	59	60	71	1.94182	2.10235	5.82841	2.87724	2.53995	3.33356	BAB62154.1	GA 3beta-hydroxylase [Oryza sativa]|BAF04100.1 Os01g0177400 [Oryza sativa Japonica Group]|BAS70691.1 Os01g0177400 [Oryza sativa Japonica Group]
LOC_Os01g08260.MSUv7.0	11	36	50	31	9	19	0.254019	0.860929	1.12124	0.79105	0.199358	0.46679	EEC70041.1	hypothetical protein OsI_00628 [Oryza sativa Indica Group]
LOC_Os01g08270.MSUv7.0	1460	1391	1397	816	886	1122	25.3821	25.0433	23.5845	15.6759	14.7749	20.752	XP_015616144.1	aromatic aminotransferase ISS1 [Oryza sativa Japonica Group]|XP_015616151.1 aromatic aminotransferase ISS1 [Oryza sativa Japonica Group]|BAB63467.1 putative aspartate aminotransferase [Oryza sativa Japonica Group]|BAF04102.1 Os01g0178000 [Oryza sativa Japonica Group]|EAY72764.1 hypothetical protein OsI_00629 [Oryza sativa Indica Group]|EAZ10762.1 hypothetical protein OsJ_00598 [Oryza sativa Japon…
LOC_Os01g08280.MSUv7.0	612	561	650	505	633	542	15.0106	14.2495	15.4816	13.6869	14.8925	14.1429	EEE53978.1	hypothetical protein OsJ_00599 [Oryza sativa Japonica Group]
LOC_Os01g08290.MSUv7.0	415	462	547	317	316	310	12.6639	14.5999	16.2092	10.6892	9.2496	10.0641	BAD67826.1	hypothetical protein [Oryza sativa Japonica Group]|BAD67988.1 hypothetical protein [Oryza sativa Japonica Group]|EAY72766.1 hypothetical protein OsI_00631 [Oryza sativa Indica Group]|EAZ10764.1 hypothetical protein OsJ_00600 [Oryza sativa Japonica Group]|BAF04104.2 Os01g0178200 [Oryza sativa Japonica Group]|BAS70700.1 Os01g0178200 [Oryza sativa Japonica Group]
LOC_Os01g08300.MSUv7.0	468	1005	1966	106	57	290	150.569	334.848	614.228	37.6846	17.5907	99.2618	LOC_Os01g08300.MSUv7.0	-
LOC_Os01g08310.MSUv7.0	125	148	173	192	166	105	7.19892	8.82693	9.67517	12.2187	9.17029	6.43339	XP_015621854.1	serine/threonine protein phosphatase 2A 57 kDa regulatory subunit B&apos; kappa isoform [Oryza sativa Japonica Group]|BAD67828.1 putative serine/threonine protein phosphatase 2A (PP2A) regulatory subunit B&apos; (B&apos;gamma) [Oryza sativa Japonica Group]|BAD67990.1 putative serine/threonine protein phosphatase 2A (PP2A) regulatory subunit B&apos; (B&apos;gamma) [Oryza sativa Japonica Group]
LOC_Os01g08320.MSUv7.0	1097	1335	1477	1160	1752	1056	42.1029	53.0613	55.048	49.1962	64.4997	43.1185	XP_015622507.1	auxin-responsive protein IAA1 [Oryza sativa Japonica Group]|Q5VRD1.1 RecName: Full=Auxin-responsive protein IAA1; AltName: Full=Indoleacetic acid-induced protein 1|BAD67830.1 putative Nt-iaa4.1 deduced protein [Oryza sativa Japonica Group]|BAD67992.1 putative Nt-iaa4.1 deduced protein [Oryza sativa Japonica Group]|BAF04106.1 Os01g0178500 [Oryza sativa Japonica Group]|BAG91334.1 unnamed protein pr…
LOC_Os01g08340.MSUv7.0	295	286	235	173	159	224	7.13147	7.16001	5.51671	4.62137	3.68699	5.76101	BAS70705.1	Os01g0178700, partial [Oryza sativa Japonica Group]
LOC_Os01g08350.MSUv7.0	0	3	1	0	5	0	0	0.461329	0.144196	0	0.712175	0	EEE53982.1	hypothetical protein OsJ_00606 [Oryza sativa Japonica Group]
LOC_Os01g08370.MSUv7.0	319	208	237	242	231	204	9.70031	6.55011	6.9984	8.13164	6.7379	6.59962	BAF04109.1	Os01g0178900, partial [Oryza sativa Japonica Group]|BAS70707.1 Os01g0178900, partial [Oryza sativa Japonica Group]
LOC_Os01g08380.MSUv7.0	4330	5040	3679	1328	613	1223	129.108	155.627	106.524	43.7553	17.5325	38.7958	XP_015620017.1	acyl transferase 7-like [Oryza sativa Japonica Group]|BAB07968.1 3&apos;-N-debenzoyltaxol N-benzoyltransferase -like [Oryza sativa Japonica Group]|BAB63477.1 3&apos;-N-debenzoyltaxol N-benzoyltransferase -like [Oryza sativa Japonica Group]|BAF04110.1 Os01g0179000 [Oryza sativa Japonica Group]|BAS70708.1 Os01g0179000 [Oryza sativa Japonica Group]
LOC_Os01g08400.MSUv7.0	825	985	859	672	541	675	25.3682	31.3663	25.6498	22.8335	15.957	22.0817	EAZ10774.1	hypothetical protein OsJ_00609 [Oryza sativa Japonica Group]
LOC_Os01g08410.MSUv7.0	1368	1384	1394	1285	1371	1287	41.4296	43.4062	40.9961	43.0027	39.8272	41.4665	EAY72778.1	hypothetical protein OsI_00641 [Oryza sativa Indica Group]
LOC_Os01g08420.MSUv7.0	721	619	786	642	867	956	11.0819	9.85279	11.7316	10.9039	12.7825	15.6325	XP_015619226.1	uncharacterized protein LOC4323878 [Oryza sativa Japonica Group]|BAO23504.1 hypothetical protein [Oryza sativa Japonica Group]|BAS70711.1 Os01g0179400 [Oryza sativa Japonica Group]
LOC_Os01g08430.MSUv7.0	912	789	891	733	924	824	9.16045	8.2071	8.69071	8.13568	8.9025	8.80527	XP_015616525.1	uncharacterized protein LOC4323879 [Oryza sativa Japonica Group]|EAZ10777.1 hypothetical protein OsJ_00612 [Oryza sativa Japonica Group]
LOC_Os01g08440.MSUv7.0	141	124	243	49	48	48	4.04455	3.68352	6.76881	1.55315	1.32072	1.46482	XP_015647615.1	crocetin glucosyltransferase, chloroplastic [Oryza sativa Japonica Group]|BAH01690.1 unnamed protein product [Oryza sativa Japonica Group]|BAF04115.2 Os01g0179600 [Oryza sativa Japonica Group]|BAS70714.1 Os01g0179600 [Oryza sativa Japonica Group]
LOC_Os01g08450.MSUv7.0	693	701	696	593	509	517	47.588	49.8509	46.4118	44.9973	33.5274	37.7701	XP_015622489.1	GTP-binding protein YPTM2 [Oryza sativa Japonica Group]|BAF04116.1 Os01g0179700 [Oryza sativa Japonica Group]|EAY72782.1 hypothetical protein OsI_00645 [Oryza sativa Indica Group]|EAZ10779.1 hypothetical protein OsJ_00614 [Oryza sativa Japonica Group]|BAG91666.1 unnamed protein product [Oryza sativa Japonica Group]|BAG87192.1 unnamed protein product [Oryza sativa Japonica Group]|BAS70715.1 Os01g0…
LOC_Os01g08460.MSUv7.0	106	271	494	45	51	80	4.05634	10.7396	18.3574	1.90287	1.87205	3.25696	EEC70050.1	hypothetical protein OsI_00646 [Oryza sativa Indica Group]
LOC_Os01g08464.MSUv7.0	2	11	3	3	4	12	0.114299	0.65102	0.16649	0.189452	0.219275	0.729601	BAB07957.1	hypothetical protein [Oryza sativa Japonica Group]|BAB33012.1 hypothetical protein [Oryza sativa Japonica Group]
LOC_Os01g08470.MSUv7.0	58	70	34	91	27	67	1.32819	1.66005	0.75608	2.30273	0.593082	1.63231	XP_015624422.1	leucine-rich repeat extensin-like protein 3 [Oryza sativa Japonica Group]|BAD67840.1 putative leucine-rich repeat/extensin 1 [Oryza sativa Japonica Group]|BAD68079.1 putative leucine-rich repeat/extensin 1 [Oryza sativa Japonica Group]|BAF04118.1 Os01g0180000 [Oryza sativa Japonica Group]|BAG95948.1 unnamed protein product [Oryza sativa Japonica Group]|EEE53988.1 hypothetical protein OsJ_00617 [O…
LOC_Os01g08510.MSUv7.0	195	171	143	170	200	170	3.74068	3.39706	2.66384	3.60357	3.68014	3.46943	XP_015621026.1	MAR-binding filament-like protein 1 isoform X2 [Oryza sativa Japonica Group]|BAD68082.1 putative MAR binding filament-like protein 1 [Oryza sativa Japonica Group]|BAF04120.1 Os01g0180300 [Oryza sativa Japonica Group]|BAG99988.1 unnamed protein product [Oryza sativa Japonica Group]|BAS70721.1 Os01g0180300 [Oryza sativa Japonica Group]
LOC_Os01g08520.MSUv7.0	94	53	80	162	139	65	2.97287	1.73586	2.45694	5.6615	4.21678	2.18703	XP_015631603.1	uncharacterized protein LOC4325352 [Oryza sativa Japonica Group]|XP_015631611.1 uncharacterized protein LOC4325352 [Oryza sativa Japonica Group]
LOC_Os01g08540.MSUv7.0	212	208	188	257	432	430	2.72222	2.76593	2.34423	3.6466	5.32094	5.8742	XP_015622469.1	DNA mismatch repair protein MSH7 isoform X1 [Oryza sativa Japonica Group]|BAD68036.1 putative DNA mismatch repair protein [Oryza sativa Japonica Group]|BAD68084.1 putative DNA mismatch repair protein [Oryza sativa Japonica Group]|BAF04122.1 Os01g0180600 [Oryza sativa Japonica Group]|BAS70724.1 Os01g0180600 [Oryza sativa Japonica Group]
LOC_Os01g08550.MSUv7.0	41	42	46	52	36	69	1.08584	1.15192	1.18302	1.52178	0.914536	1.94412	BAF04123.2	Os01g0180700, partial [Oryza sativa Japonica Group]
LOC_Os01g08560.MSUv7.0	1121	1263	1196	1254	1303	1207	18.3271	21.3836	18.9878	22.6544	20.4338	20.9937	XP_015616548.1	heat shock 70 kDa protein 15 [Oryza sativa Japonica Group]|BAB32902.1 putative heat shock protein [Oryza sativa Japonica Group]|BAB33024.1 putative heat shock protein [Oryza sativa Japonica Group]|BAF04124.1 Os01g0180800 [Oryza sativa Japonica Group]|EAZ10794.1 hypothetical protein OsJ_00630 [Oryza sativa Japonica Group]|ADR66977.1 70 kDa heat shock protein [Oryza sativa Japonica Group]|BAS70726.…
LOC_Os01g08580.MSUv7.0	231	225	285	208	234	252	6.20286	6.25682	7.43157	6.17179	6.02718	7.19903	XP_015617266.1	FRIGIDA-like protein 4a [Oryza sativa Japonica Group]|BAD68038.1 hypothetical protein [Oryza sativa Japonica Group]|BAD68086.1 hypothetical protein [Oryza sativa Japonica Group]|BAS70731.1 Os01g0181000 [Oryza sativa Japonica Group]
LOC_Os01g08600.MSUv7.0	28	19	48	19	30	21	1.78844	1.25678	2.97723	1.34103	1.83804	1.42701	EEC80292.1	hypothetical protein OsI_22305 [Oryza sativa Indica Group]|EEE65402.1 hypothetical protein OsJ_20735 [Oryza sativa Japonica Group]
LOC_Os01g08630.MSUv7.0	2	2	0	3	0	0	0.070054	0.0725477	0	0.116116	0	0	BAD68044.1	hypothetical protein [Oryza sativa Japonica Group]
LOC_Os01g08650.MSUv7.0	110	116	134	123	147	127	3.26679	3.56761	3.86446	4.03647	4.18759	4.0126	XP_015624827.1	uncharacterized protein LOC4325360 [Oryza sativa Japonica Group]|BAB32913.1 unknown protein [Oryza sativa Japonica Group]|BAF04129.1 Os01g0182100 [Oryza sativa Japonica Group]|EAZ10801.1 hypothetical protein OsJ_00636 [Oryza sativa Japonica Group]|BAS70737.1 Os01g0182100 [Oryza sativa Japonica Group]
LOC_Os01g08660.MSUv7.0	713	722	847	658	524	526	31.2809	32.8033	36.0851	31.8994	22.0515	24.551	XP_015621893.1	aquaporin SIP1-1 [Oryza sativa Japonica Group]|Q5VR89.2 RecName: Full=Aquaporin SIP1-1; AltName: Full=OsSIP1;1; AltName: Full=Small basic intrinsic protein 1-1|BAB32914.1 putative small basic membrane integral protein [Oryza sativa Japonica Group]|BAF04130.1 Os01g0182200 [Oryza sativa Japonica Group]|EAZ10802.1 hypothetical protein OsJ_00637 [Oryza sativa Japonica Group]|BAG97624.1 unnamed protei…
LOC_Os01g08670.MSUv7.0	198	171	251	122	59	63	12.7878	11.4372	15.742	8.70683	3.65512	4.32879	XP_015621894.1	uncharacterized protein LOC4325362 [Oryza sativa Japonica Group]|BAD68049.1 unknown protein [Oryza sativa Japonica Group]|EAZ10803.1 hypothetical protein OsJ_00638 [Oryza sativa Japonica Group]|BAG88456.1 unnamed protein product [Oryza sativa Japonica Group]|BAF04131.2 Os01g0182300 [Oryza sativa Japonica Group]|BAS70740.1 Os01g0182300 [Oryza sativa Japonica Group]
LOC_Os01g08680.MSUv7.0	67	36	49	47	45	50	1.70928	0.951109	1.21392	1.32496	1.1012	1.35707	EEE53998.1	hypothetical protein OsJ_00639 [Oryza sativa Japonica Group]
LOC_Os01g08690.MSUv7.0	243	172	183	170	195	188	9.48704	6.95414	6.93794	7.33401	7.30259	7.80865	XP_015628788.1	uncharacterized protein LOC9272136 isoform X1 [Oryza sativa Japonica Group]|EEE53999.1 hypothetical protein OsJ_00640 [Oryza sativa Japonica Group]|BAS70742.1 Os01g0182500 [Oryza sativa Japonica Group]
LOC_Os01g08700.MSUv7.0	41994	41159	43628	25488	29412	28189	459.046	465.935	463.116	307.874	308.398	327.825	EEE54000.1	hypothetical protein OsJ_00641 [Oryza sativa Japonica Group]
LOC_Os01g08710.MSUv7.0	38	31	49	20	19	14	0.965188	0.815419	1.20859	0.56134	0.462913	0.378312	BAF04135.1	Os01g0182700 [Oryza sativa Japonica Group]
LOC_Os01g08730.MSUv7.0	0	0	0	0	1	0	0	0	0	0	0.0160548	0	BAD67783.1	hypothetical protein [Oryza sativa Japonica Group]
LOC_Os01g08750.MSUv7.0	2199	1855	1999	2038	3240	2732	10.3226	9.01779	9.11241	10.5715	14.5891	13.6439	XP_015650020.1	uncharacterized protein LOC4325331 isoform X1 [Oryza sativa Japonica Group]|XP_015650029.1 uncharacterized protein LOC4325331 isoform X1 [Oryza sativa Japonica Group]
LOC_Os01g08760.MSUv7.0	678	653	476	415	355	445	33.5588	33.472	22.8791	22.6983	16.8548	23.4332	BAD67787.1	putative choline kinase [Oryza sativa Japonica Group]
LOC_Os01g08770.MSUv7.0	433	392	531	374	487	361	10.305	9.66136	12.2719	9.83561	11.1175	9.14034	XP_015638856.1	probable U3 small nucleolar RNA-associated protein 7 [Oryza sativa Japonica Group]|XP_015638915.1 probable U3 small nucleolar RNA-associated protein 7 [Oryza sativa Japonica Group]|BAA99518.1 putative BING4-like protein [Oryza sativa Japonica Group]|BAF04138.1 Os01g0183100 [Oryza sativa Japonica Group]|BAG99404.1 unnamed protein product [Oryza sativa Japonica Group]|EEE54003.1 hypothetical protei…
LOC_Os01g08780.MSUv7.0	428	1920	592	200	136	643	9.53309	44.2876	12.8046	4.92252	2.90567	15.2368	XP_015629093.1	type IV inositol polyphosphate 5-phosphatase 3 [Oryza sativa Japonica Group]|BAD67788.1 putative inositol polyphosphate 5-phosphatase [Oryza sativa Japonica Group]|BAF04139.1 Os01g0183300 [Oryza sativa Japonica Group]|EEE54004.1 hypothetical protein OsJ_00647 [Oryza sativa Japonica Group]|BAS70750.1 Os01g0183300 [Oryza sativa Japonica Group]
LOC_Os01g08790.MSUv7.0	2	5	7	9	2	7	0.145384	0.376398	0.494128	0.722931	0.139455	0.54135	XP_025879187.1	tropomyosin [Oryza sativa Japonica Group]|BAD67789.1 hypothetical protein [Oryza sativa Japonica Group]|BAF04140.1 Os01g0183400 [Oryza sativa Japonica Group]|BAS70751.1 Os01g0183400 [Oryza sativa Japonica Group]
LOC_Os01g08800.MSUv7.0	13	12	20	17	21	20	0.38367	0.366764	0.573192	0.554411	0.5945	0.62797	XP_015643486.1	noroxomaritidine synthase [Oryza sativa Japonica Group]|BAA99522.1 putative cytochrome P450 [Oryza sativa Japonica Group]|EAZ10814.1 hypothetical protein OsJ_00649 [Oryza sativa Japonica Group]
LOC_Os01g08810.MSUv7.0	134	231	302	126	116	125	3.90173	6.96555	8.53916	4.05407	3.23988	3.87219	XP_015621294.1	alkane hydroxylase MAH1 [Oryza sativa Japonica Group]|BAA99523.1 putative cytochrome P450 [Oryza sativa Japonica Group]|BAF04142.1 Os01g0183600 [Oryza sativa Japonica Group]|BAG99058.1 unnamed protein product [Oryza sativa Japonica Group]|BAS70753.1 Os01g0183600 [Oryza sativa Japonica Group]
LOC_Os01g08814.MSUv7.0	274	295	340	212	270	204	12.7168	14.1788	15.3236	10.8725	12.0201	10.0728	BAH90939.1	Os01g0183633 [Oryza sativa Japonica Group]
LOC_Os01g08820.MSUv7.0	20	14	21	27	12	16	0.513499	0.372245	0.523581	0.766022	0.295535	0.437042	XP_015642944.1	uncharacterized protein LOC9271558 [Oryza sativa Japonica Group]|EAZ10816.1 hypothetical protein OsJ_00652 [Oryza sativa Japonica Group]|BAH90940.1 Os01g0183700 [Oryza sativa Japonica Group]
LOC_Os01g08830.MSUv7.0	2607	2333	2388	2962	3818	2963	75.5713	70.036	67.2211	94.8788	106.162	91.3779	XP_015621483.1	F-box protein At2g05970 isoform X1 [Oryza sativa Japonica Group]|XP_015621484.1 F-box protein At2g05970 isoform X1 [Oryza sativa Japonica Group]|BAF04143.1 Os01g0183800 [Oryza sativa Japonica Group]|BAS70756.1 Os01g0183800 [Oryza sativa Japonica Group]
LOC_Os01g08840.MSUv7.0	0	8	5	38	2	4	0	0.922657	0.540736	4.6764	0.213652	0.473929	XP_015645155.1	uncharacterized protein LOC107277953 [Oryza sativa Japonica Group]|BAD67792.1 hypothetical protein [Oryza sativa Japonica Group]|EAY72810.1 hypothetical protein OsI_00677 [Oryza sativa Indica Group]|EAZ10818.1 hypothetical protein OsJ_00654 [Oryza sativa Japonica Group]|BAS70758.1 Os01g0183900 [Oryza sativa Japonica Group]
LOC_Os01g08850.MSUv7.0	382	361	451	344	393	326	11.1104	10.8734	12.7379	11.0559	10.9642	10.0874	XP_015611088.1	polynucleotide 5&apos;-hydroxyl-kinase NOL9 [Oryza sativa Japonica Group]|BAD67793.1 unknown protein [Oryza sativa Japonica Group]|BAF04144.1 Os01g0184000 [Oryza sativa Japonica Group]|BAG92331.1 unnamed protein product [Oryza sativa Japonica Group]|BAG94675.1 unnamed protein product [Oryza sativa Japonica Group]|BAS70760.1 Os01g0184000 [Oryza sativa Japonica Group]
LOC_Os01g08860.MSUv7.0	0	2	0	1	0	4	0	0.127753	0	0.068158	0	0.262484	BAS70761.1	Os01g0184050, partial [Oryza sativa Japonica Group]
LOC_Os01g08930.MSUv7.0	344	327	354	360	644	438	8.28527	8.15618	8.27956	9.58118	14.8783	11.2232	XP_015613578.1	DEAD-box ATP-dependent RNA helicase 39 isoform X1 [Oryza sativa Japonica Group]|XP_015613586.1 DEAD-box ATP-dependent RNA helicase 39 isoform X2 [Oryza sativa Japonica Group]|Q5VRY0.1 RecName: Full=DEAD-box ATP-dependent RNA helicase 39|BAD67795.1 putative VASA [Oryza sativa Japonica Group]|BAF04148.1 Os01g0184500 [Oryza sativa Japonica Group]|EEE54007.1 hypothetical protein OsJ_00660 [Oryza sati…
LOC_Os01g08950.MSUv7.0	60	29	63	37	45	56	2.42232	1.21246	2.46988	1.65063	1.74265	2.40525	BAF04149.1	Os01g0184700 [Oryza sativa Japonica Group]|BAG87871.1 unnamed protein product [Oryza sativa Japonica Group]
LOC_Os01g08960.MSUv7.0	223	242	245	260	270	291	10.4334	11.7254	11.1312	13.4419	12.1172	14.4846	XP_015617067.1	phosducin-like protein 3 [Oryza sativa Japonica Group]|BAB03357.1 putative phosducin-like 3 [Oryza sativa Japonica Group]|BAF04150.1 Os01g0184800 [Oryza sativa Japonica Group]|BAG93425.1 unnamed protein product [Oryza sativa Japonica Group]|BAG95608.1 unnamed protein product [Oryza sativa Japonica Group]|EEE54008.1 hypothetical protein OsJ_00663 [Oryza sativa Japonica Group]|BAS70768.1 Os01g01848…
LOC_Os01g08970.MSUv7.0	3986	3871	3564	5904	7177	5581	79.5067	79.9614	69.0334	130.131	137.318	118.433	AAM46895.1	early drought induced protein [Oryza sativa Indica Group]|EEC70072.1 hypothetical protein OsI_00684 [Oryza sativa Indica Group]
LOC_Os01g08990.MSUv7.0	2	0	1	3	6	7	0.121069	0	0.0587838	0.200674	0.348395	0.450811	XP_015644833.1	uncharacterized protein LOC107276490 isoform X2 [Oryza sativa Japonica Group]|BAB03360.1 hypothetical protein [Oryza sativa Japonica Group]|EAZ10828.1 hypothetical protein OsJ_00665 [Oryza sativa Japonica Group]
LOC_Os01g09000.MSUv7.0	2317	2466	2647	2275	2856	2563	42.2542	46.5723	46.8762	45.8451	49.9597	49.7262	XP_015621790.1	glutamine--tRNA ligase [Oryza sativa Japonica Group]|BAD67797.1 putative tRNA-glutamine synthetase [Oryza sativa Japonica Group]|BAF04152.1 Os01g0185200 [Oryza sativa Japonica Group]|BAG89372.1 unnamed protein product [Oryza sativa Japonica Group]|EEE54010.1 hypothetical protein OsJ_00666 [Oryza sativa Japonica Group]|AGW30397.1 tRNA-glutamine synthetase [Oryza sativa Japonica Group]|BAS70772.1 O…
LOC_Os01g09010.MSUv7.0	1993	2727	2246	1381	877	1913	55.4594	78.5857	60.6922	42.4648	23.4091	56.6339	EAZ10830.1	hypothetical protein OsJ_00667 [Oryza sativa Japonica Group]
LOC_Os01g09020.MSUv7.0	1574	1632	1477	2230	3256	4231	31.0511	33.3414	28.2949	48.6122	61.6134	88.7993	EEC70075.1	hypothetical protein OsI_00688 [Oryza sativa Indica Group]
LOC_Os01g09030.MSUv7.0	147	181	198	201	320	123	2.5261	3.22109	3.3041	3.81678	5.27474	2.2487	BAB03364.1	unknown protein [Oryza sativa Japonica Group]
LOC_Os01g09080.MSUv7.0	2043	2229	1958	1342	1341	1570	56.5789	63.9274	52.6568	41.0683	35.6232	46.2572	EAY72823.1	hypothetical protein OsI_00690 [Oryza sativa Indica Group]
LOC_Os01g09100.MSUv7.0	110	111	166	101	135	113	5.95968	6.22794	8.73361	6.04672	7.01588	6.51332	XP_015633261.1	probable WRKY transcription factor 50 [Oryza sativa Japonica Group]|AAQ20913.1 WRKY13 [Oryza sativa Japonica Group]|BAF04157.1 Os01g0186000 [Oryza sativa Japonica Group]|EAZ10835.1 hypothetical protein OsJ_00671 [Oryza sativa Japonica Group]|ADX60238.1 WRKY transcription factor, partial [Oryza sativa Japonica Group]
LOC_Os01g09120.MSUv7.0	2192	2025	2074	1723	2191	2003	64.3285	61.543	59.1053	55.8748	61.677	62.537	XP_015622470.1	protein TWIN LOV 1 [Oryza sativa Japonica Group]|BAD67803.1 putative PHY3 protein [Oryza sativa Japonica Group]|BAF04158.1 Os01g0186200 [Oryza sativa Japonica Group]|BAG98701.1 unnamed protein product [Oryza sativa Japonica Group]|EEE54014.1 hypothetical protein OsJ_00672 [Oryza sativa Japonica Group]|BAS70782.1 Os01g0186200 [Oryza sativa Japonica Group]
LOC_Os01g09140.MSUv7.0	0	1	1	0	0	0	0	0.119151	0.111728	0	0	0	BAB03372.1	hypothetical protein [Oryza sativa Japonica Group]|EAZ10838.1 hypothetical protein OsJ_00674 [Oryza sativa Japonica Group]
LOC_Os01g09150.MSUv7.0	18	14	15	36	5	16	1.2459	1.00353	1.00822	2.75347	0.33197	1.17821	XP_015641666.1	uncharacterized protein LOC107278147 [Oryza sativa Japonica Group]|BAB03374.1 hypothetical protein [Oryza sativa Japonica Group]|BAB03405.1 hypothetical protein [Oryza sativa Japonica Group]|BAS70785.1 Os01g0186500 [Oryza sativa Japonica Group]
LOC_Os01g09190.MSUv7.0	1	9	10	7	1	4	0.0550953	0.513509	0.53502	0.426168	0.0528485	0.23446	XP_015642427.1	uncharacterized protein LOC4325660 [Oryza sativa Japonica Group]|BAD67807.1 unknown protein [Oryza sativa Japonica Group]|BAD72246.1 unknown protein [Oryza sativa Japonica Group]|EAY72830.1 hypothetical protein OsI_00696 [Oryza sativa Indica Group]|BAG98295.1 unnamed protein product [Oryza sativa Japonica Group]|BAF04159.2 Os01g0186600 [Oryza sativa Japonica Group]|BAS70786.1 Os01g0186600 [Oryza …
LOC_Os01g09200.MSUv7.0	1803	2174	1835	1270	1334	1826	39.5175	49.3451	39.0558	30.7585	28.0458	42.5783	XP_015620476.1	serine/threonine-protein kinase tricorner isoform X2 [Oryza sativa Japonica Group]
LOC_Os01g09230.MSUv7.0	110	74	108	100	76	78	3.9814	2.77374	3.79597	3.99955	2.63861	3.00353	EEC70080.1	hypothetical protein OsI_00699 [Oryza sativa Indica Group]
LOC_Os01g09246.MSUv7.0	3820	3454	3878	2895	3967	3686	39.2236	36.728	38.6676	32.8474	39.0719	40.2655	XP_015616323.1	uncharacterized protein LOC4325666 [Oryza sativa Japonica Group]|BAD72252.1 unknown protein [Oryza sativa Japonica Group]|BAD72261.1 unknown protein [Oryza sativa Japonica Group]|BAF04164.1 Os01g0187400 [Oryza sativa Japonica Group]|BAS70795.1 Os01g0187400 [Oryza sativa Japonica Group]
LOC_Os01g09252.MSUv7.0	1381	1329	1347	1156	1507	1474	32.6431	32.5321	30.9186	30.1942	34.1687	37.0671	EEC70085.1	hypothetical protein OsI_00706 [Oryza sativa Indica Group]
LOC_Os01g09260.MSUv7.0	11	75	21	8	3	20	0.35855	2.53168	0.664709	0.288148	0.0937986	0.693555	BAF04166.1	Os01g0187600, partial [Oryza sativa Japonica Group]|BAS70797.1 Os01g0187600, partial [Oryza sativa Japonica Group]
LOC_Os01g09270.MSUv7.0	10	13	16	5	23	8	2.28597	3.07755	3.55178	1.26302	5.04332	1.9456	BAD72253.1	unknown protein [Oryza sativa Japonica Group]|BAD72262.1 unknown protein [Oryza sativa Japonica Group]|BAF04167.1 Os01g0187700 [Oryza sativa Japonica Group]
LOC_Os01g09280.MSUv7.0	179	218	241	171	85	175	5.50738	6.94607	7.20053	5.81375	2.50859	5.72828	XP_015621787.1	transcription factor MYBS3-like [Oryza sativa Japonica Group]|BAD72254.1 putative MybSt1 [Oryza sativa Japonica Group]|BAD72263.1 putative MybSt1 [Oryza sativa Japonica Group]|BAF04168.1 Os01g0187900 [Oryza sativa Japonica Group]|EAY72837.1 hypothetical protein OsI_00708 [Oryza sativa Indica Group]|BAG92581.1 unnamed protein product [Oryza sativa Japonica Group]|BAS70798.1 Os01g0187900 [Oryza sat…
LOC_Os01g09300.MSUv7.0	448	612	513	647	734	662	14.2725	20.1913	15.8707	22.7769	22.4304	22.4375	XP_015617725.1	2-oxoglutarate-Fe(II) type oxidoreductase hxnY isoform X1 [Oryza sativa Japonica Group]
LOC_Os01g09305.MSUv7.0	273	237	272	277	273	196	18.3835	16.5274	17.7864	20.6116	17.6338	14.0415	XP_025879301.1	uncharacterized protein LOC4326768 isoform X3 [Oryza sativa Japonica Group]
LOC_Os01g09310.MSUv7.0	144	103	147	82	138	150	2.30719	1.70903	2.28715	1.45179	2.12089	2.55686	XP_015617704.1	uncharacterized protein LOC4326768 isoform X2 [Oryza sativa Japonica Group]
LOC_Os01g09320.MSUv7.0	12769	12071	10307	17109	14395	15891	242.537	237.441	190.112	359.099	262.272	321.119	EAY72841.1	hypothetical protein OsI_00711 [Oryza sativa Indica Group]
LOC_Os01g09340.MSUv7.0	0	2	3	1	0	3	0	0.0657836	0.0925281	0.0350966	0	0.101371	XP_015642671.1	uncharacterized protein LOC9267956 [Oryza sativa Japonica Group]
LOC_Os01g09370.MSUv7.0	3945	3445	3638	3208	4349	3347	141.315	127.798	126.55	126.983	149.434	127.553	BAS70807.1	Os01g0188900, partial [Oryza sativa Japonica Group]
LOC_Os01g09384.MSUv7.0	4	2	3	5	2	6	0.0690333	0.0357453	0.0502777	0.0953535	0.033109	0.110165	CAE03128.3	OJ000114_01.9 [Oryza sativa Japonica Group]
LOC_Os01g09420.MSUv7.0	223	324	277	369	468	329	6.14963	9.25294	7.41787	11.2444	12.3796	9.65236	XP_015622235.1	uncharacterized protein LOC4326773 [Oryza sativa Japonica Group]|BAD72215.1 unknown protein [Oryza sativa Japonica Group]|BAF04175.2 Os01g0189800 [Oryza sativa Japonica Group]|BAS70813.1 Os01g0189800 [Oryza sativa Japonica Group]
LOC_Os01g09430.MSUv7.0	1098	995	1698	1592	1547	1291	48.4162	45.4362	72.7078	77.571	65.4329	60.5631	BAS70814.1	Os01g0190000 [Oryza sativa Japonica Group]
LOC_Os01g09450.MSUv7.0	4038	2074	2230	3305	3055	1903	113.64	60.4455	60.9431	102.779	82.4696	56.9767	XP_015622022.1	auxin-responsive protein IAA2 [Oryza sativa Japonica Group]|Q9LG86.1 RecName: Full=Auxin-responsive protein IAA2; AltName: Full=Indoleacetic acid-induced protein 2|BAA99424.1 putative auxin-induced protein IAA18 [Oryza sativa Japonica Group]|BAF04177.1 Os01g0190300 [Oryza sativa Japonica Group]|EAZ10859.1 hypothetical protein OsJ_00698 [Oryza sativa Japonica Group]|BAG94546.1 unnamed protein prod…
LOC_Os01g09460.MSUv7.0	1297	1156	1530	1057	1168	1235	35.2266	32.5147	40.3532	31.723	30.4293	35.6855	BAF04178.1	Os01g0190400, partial [Oryza sativa Japonica Group]
LOC_Os01g09470.MSUv7.0	20	16	25	34	27	30	0.568067	0.470631	0.689549	1.06713	0.735616	0.906535	EEC70092.1	hypothetical protein OsI_00721 [Oryza sativa Indica Group]
LOC_Os01g09500.MSUv7.0	226	193	224	128	182	150	18.7865	16.6145	18.0818	11.7575	14.512	13.2655	BAS70818.1	Os01g0191000 [Oryza sativa Japonica Group]
LOC_Os01g09510.MSUv7.0	1569	1639	2360	1948	1413	1449	83.4454	90.2712	121.884	114.482	72.0841	81.9864	XP_015622106.1	60S acidic ribosomal protein P2A [Oryza sativa Japonica Group]|BAD72223.1 putative acidic ribosomal protein P2a-2 [Oryza sativa Japonica Group]|BAF04182.1 Os01g0191100 [Oryza sativa Japonica Group]|EAY72855.1 hypothetical protein OsI_00724 [Oryza sativa Indica Group]|EAZ44369.1 hypothetical protein OsJ_28991 [Oryza sativa Japonica Group]|BAG86805.1 unnamed protein product [Oryza sativa Japonica G…
LOC_Os01g09540.MSUv7.0	101	259	676	35	47	19	3.84805	10.219	25.0105	1.47352	1.71765	0.770135	EAZ10863.1	hypothetical protein OsJ_00702 [Oryza sativa Japonica Group]
LOC_Os01g09550.MSUv7.0	1416	1159	1777	1101	1038	1068	12.659	10.7303	15.4269	10.8766	8.90128	10.1579	XP_025879356.1	NAC domain-containing protein 75 isoform X2 [Oryza sativa Japonica Group]
LOC_Os01g09560.MSUv7.0	2292	2270	2411	1845	1827	1856	59.3735	60.8968	60.6499	52.8131	45.3977	51.1504	EAY72858.1	hypothetical protein OsI_00727 [Oryza sativa Indica Group]
LOC_Os01g09570.MSUv7.0	474	620	756	537	501	603	10.8355	14.6775	16.7822	13.5648	10.9857	14.665	EAZ10866.1	hypothetical protein OsJ_00706 [Oryza sativa Japonica Group]
LOC_Os01g09580.MSUv7.0	49	48	60	72	20	50	1.46438	1.48556	1.74127	2.37771	0.573333	1.58973	XP_015633636.1	serine/threonine-protein kinase Aurora-2 [Oryza sativa Japonica Group]|BAD72229.1 putative protein kinase p46XlEg22 [Oryza sativa Japonica Group]|BAD72232.1 putative protein kinase p46XlEg22 [Oryza sativa Japonica Group]|BAF04188.1 Os01g0191800 [Oryza sativa Japonica Group]|EAZ10867.1 hypothetical protein OsJ_00707 [Oryza sativa Japonica Group]|BAG87875.1 unnamed protein product [Oryza sativa Jap…
LOC_Os01g09590.MSUv7.0	2338	1920	1690	3104	3472	2216	104.598	88.9553	73.4213	153.451	148.997	105.473	AAL84625.1	typical P-type R2R3 Myb protein [Oryza sativa Japonica Group]
LOC_Os01g09610.MSUv7.0	0	0	7	0	2	0	0	0	0.139101	0	0.0392577	0	CAE02455.1	OSJNBa0042D13.8 [Oryza sativa Japonica Group]
LOC_Os01g09620.MSUv7.0	5806	3795	3488	5322	7742	3916	145.485	98.4793	84.8739	147.362	186.086	104.395	XP_025879384.1	zinc finger CCCH domain-containing protein 2 [Oryza sativa Japonica Group]|Q9FU27.1 RecName: Full=Zinc finger CCCH domain-containing protein 2; Short=OsC3H2; AltName: Full=Protein DELAY OF THE ONSET OF SENESCENCE; Short=OsDOS|BAB12694.1 CCCH-type zinc finger protein -like [Oryza sativa Japonica Group]|BAF04190.1 Os01g0192000 [Oryza sativa Japonica Group]|BAG94757.1 unnamed protein product [Oryza …
LOC_Os01g09640.MSUv7.0	2584	2008	2145	2425	2725	1776	76.1325	61.2678	61.3706	78.951	77.0127	55.6691	XP_015625837.1	transcription factor MYBS3-like [Oryza sativa Japonica Group]|BAD72233.1 putative MCB2 protein [Oryza sativa Japonica Group]|BAF04191.1 Os01g0192300 [Oryza sativa Japonica Group]|EAZ10870.1 hypothetical protein OsJ_00711 [Oryza sativa Japonica Group]|BAG88219.1 unnamed protein product [Oryza sativa Japonica Group]|BAS70833.1 Os01g0192300 [Oryza sativa Japonica Group]
LOC_Os01g09650.MSUv7.0	21	4	12	18	17	10	2.21116	0.436165	1.22698	2.09431	1.71699	1.1202	BAD72235.1	hypothetical protein [Oryza sativa Japonica Group]
LOC_Os01g09660.MSUv7.0	131	97	154	154	122	94	8.82137	6.76437	10.0703	11.4592	7.88029	6.7342	BAS70836.1	Os01g0192401, partial [Oryza sativa Japonica Group]
LOC_Os01g09665.MSUv7.0	20	13	19	12	32	18	0.817571	0.550338	0.754231	0.542057	1.25477	0.782819	BAH90947.1	Os01g0192550 [Oryza sativa Japonica Group]|BAS70837.1 Os01g0192550 [Oryza sativa Japonica Group]
LOC_Os01g09670.MSUv7.0	139	369	137	84	63	101	4.76625	13.1033	4.56182	3.1828	2.07215	3.68449	EAY72866.1	hypothetical protein OsI_00738 [Oryza sativa Indica Group]
LOC_Os01g09700.MSUv7.0	8	6	5	6	8	14	0.218304	0.169556	0.132494	0.180922	0.209402	0.406438	XP_025879387.1	1-aminocyclopropane-1-carboxylate synthase 7 [Oryza sativa Japonica Group]|BAS70840.1 Os01g0192900 [Oryza sativa Japonica Group]
LOC_Os01g09720.MSUv7.0	0	1	0	1	0	1	0	0.0832955	0	0.0888789	0	0.0855705	XP_015645936.1	dof zinc finger protein DOF3.1 [Oryza sativa Japonica Group]|BAB12708.1 putative DNA-binding protein Dof3 [Oryza sativa Japonica Group]|BAB16849.1 putative DNA-binding protein Dof3 [Oryza sativa Japonica Group]
LOC_Os01g09740.MSUv7.0	146	156	126	95	160	144	4.34087	4.80329	3.63789	3.12115	4.56312	4.55491	EEC70099.1	hypothetical protein OsI_00744 [Oryza sativa Indica Group]
LOC_Os01g09750.MSUv7.0	230	214	265	199	199	185	5.05807	4.87373	5.65925	4.83591	4.19786	4.32835	XP_015625606.1	uncharacterized protein LOC4327311 [Oryza sativa Japonica Group]|XP_015625614.1 uncharacterized protein LOC4327311 [Oryza sativa Japonica Group]|BAB12711.1 putative RNA methyltransferase [Oryza sativa Japonica Group]|BAB16852.1 putative RNA methyltransferase [Oryza sativa Japonica Group]|BAF04196.1 Os01g0193600 [Oryza sativa Japonica Group]|BAG91089.1 unnamed protein product [Oryza sativa Japonic…
LOC_Os01g09760.MSUv7.0	1080	1032	851	948	1203	942	16.9854	16.8083	12.9968	16.4752	18.1483	15.7615	BAS70848.1	Os01g0193900, partial [Oryza sativa Japonica Group]
LOC_Os01g09770.MSUv7.0	412	687	361	311	339	426	10.3337	17.8446	8.79271	8.61963	8.15601	11.3675	BAF04198.2	Os01g0194000 [Oryza sativa Japonica Group]
LOC_Os01g09790.MSUv7.0	136	175	171	158	120	122	3.84609	5.12518	4.69604	4.93748	3.25521	3.67057	EAZ10880.1	hypothetical protein OsJ_00724 [Oryza sativa Japonica Group]
LOC_Os01g09800.MSUv7.0	4347	5484	2936	4204	3886	4149	97.2388	127.039	63.7766	103.916	83.3816	98.7386	EAZ10881.1	hypothetical protein OsJ_00725 [Oryza sativa Japonica Group]
LOC_Os01g09810.MSUv7.0	6	30	10	0	0	5	0.659749	3.41617	1.06778	0	0	0.584913	BAD72198.1	hypothetical protein [Oryza sativa Japonica Group]|BAD72417.1 hypothetical protein [Oryza sativa Japonica Group]
LOC_Os01g09830.MSUv7.0	1452	1372	997	1988	1508	1510	104.097	101.863	69.41	157.491	103.703	115.171	XP_015631554.1	monothiol glutaredoxin-S2 [Oryza sativa Japonica Group]|Q5SMY5.1 RecName: Full=Monothiol glutaredoxin-S2|BAD72201.1 unknown protein [Oryza sativa Japonica Group]|BAD72420.1 unknown protein [Oryza sativa Japonica Group]|BAF04201.1 Os01g0194600 [Oryza sativa Japonica Group]|EAY72877.1 hypothetical protein OsI_00751 [Oryza sativa Indica Group]|EAZ10884.1 hypothetical protein OsJ_00727 [Oryza sativa …
LOC_Os01g09850.MSUv7.0	752	777	815	747	686	746	11.8412	12.6704	12.4621	12.9977	10.3614	12.4971	XP_015622491.1	protein indeterminate-domain 7 [Oryza sativa Japonica Group]|BAD72204.1 putative zinc finger protein ID1 [Oryza sativa Japonica Group]|BAD72423.1 putative zinc finger protein ID1 [Oryza sativa Japonica Group]|BAF04202.1 Os01g0195000 [Oryza sativa Japonica Group]|EAZ10885.1 hypothetical protein OsJ_00729 [Oryza sativa Japonica Group]|BAS70855.1 Os01g0195000 [Oryza sativa Japonica Group]
LOC_Os01g09860.MSUv7.0	236	165	230	220	159	181	2.82118	2.04265	2.66995	2.90609	1.8232	2.30193	BAF04203.1	Os01g0195200, partial [Oryza sativa Japonica Group]|BAS70856.1 Os01g0195200, partial [Oryza sativa Japonica Group]
LOC_Os01g09870.MSUv7.0	18	28	14	62	12	29	1.80764	2.91197	1.36528	6.88015	1.15595	3.09835	XP_015644312.1	uncharacterized protein LOC107278163 [Oryza sativa Japonica Group]|BAD72206.1 hypothetical protein [Oryza sativa Japonica Group]|BAD72425.1 hypothetical protein [Oryza sativa Japonica Group]|BAS70857.1 Os01g0195300 [Oryza sativa Japonica Group]
LOC_Os01g09880.MSUv7.0	221	163	353	109	13	87	7.9548	6.07597	12.3386	4.33542	0.448847	3.33158	XP_015627374.1	NDR1/HIN1-like protein 6 [Oryza sativa Japonica Group]|BAD72207.1 hypothetical protein [Oryza sativa Japonica Group]|BAD72426.1 hypothetical protein [Oryza sativa Japonica Group]|BAS70858.1 Os01g0195400 [Oryza sativa Japonica Group]
LOC_Os01g09890.MSUv7.0	635	660	773	513	719	667	30.0329	32.3265	35.5025	26.8108	32.619	33.5617	XP_015622094.1	translation machinery-associated protein 22 [Oryza sativa Japonica Group]|BAD72209.1 putative density regulated protein drp1 [Oryza sativa Japonica Group]|BAD72428.1 putative density regulated protein drp1 [Oryza sativa Japonica Group]|BAG92059.1 unnamed protein product [Oryza sativa Japonica Group]|BAF04205.2 Os01g0195500 [Oryza sativa Japonica Group]|BAS70859.1 Os01g0195500 [Oryza sativa Japoni…
LOC_Os01g09900.MSUv7.0	0	8	8	6	0	2	0	0.280574	0.263095	0.224536	0	0.0720594	BAD72430.1	basic helix-loop-helix protein-like [Oryza sativa Japonica Group]|BAF04206.1 Os01g0195700 [Oryza sativa Japonica Group]
LOC_Os01g09930.MSUv7.0	0	1	0	3	0	0	0	0.0435637	0	0.139452	0	0	EAY72884.1	hypothetical protein OsI_00758 [Oryza sativa Indica Group]
LOC_Os01g09990.MSUv7.0	79	134	178	47	2	282	2.28877	4.02041	5.00783	1.50467	0.0555805	8.69195	XP_015626911.1	uncharacterized protein LOC4327325 [Oryza sativa Japonica Group]|BAD72434.1 basic helix-loop-helix protein-like [Oryza sativa Japonica Group]|BAF04207.1 Os01g0196300 [Oryza sativa Japonica Group]|BAG95806.1 unnamed protein product [Oryza sativa Japonica Group]|ADX60282.1 bHLH transcription factor, partial [Oryza sativa Japonica Group]|BAS70864.1 Os01g0196300 [Oryza sativa Japonica Group]
LOC_Os01g10000.MSUv7.0	13	8	14	7	13	8	1.72408	1.09874	1.803	1.02584	1.65377	1.12875	XP_015626924.1	uncharacterized protein LOC9268356 [Oryza sativa Japonica Group]|XP_015626931.1 uncharacterized protein LOC9268356 [Oryza sativa Japonica Group]
LOC_Os01g10010.MSUv7.0	177	195	200	173	113	165	7.06917	8.0653	7.75676	7.635	4.32904	7.01088	XP_015623174.1	PRA1 family protein F3 [Oryza sativa Japonica Group]|XP_015623181.1 PRA1 family protein F3 [Oryza sativa Japonica Group]|BAH01567.1 unnamed protein product [Oryza sativa Japonica Group]|EEE54048.1 hypothetical protein OsJ_00736 [Oryza sativa Japonica Group]|BAF04208.2 Os01g0196500 [Oryza sativa Japonica Group]|BAS70865.1 Os01g0196500 [Oryza sativa Japonica Group]
LOC_Os01g10020.MSUv7.0	123	105	162	90	134	118	3.45222	3.05192	4.41534	2.79129	3.60758	3.52346	XP_025879414.1	ectonucleotide pyrophosphatase/phosphodiesterase family member 1 [Oryza sativa Japonica Group]|AAF65458.1 OSE4 [Oryza sativa Indica Group]|AAA67067.1 nucleotide pyrophosphatase precursor [Oryza sativa Japonica Group]|BAB56086.1 putative nucleotide diphosphatase [Oryza sativa Japonica Group]|BAF04209.1 Os01g0196600 [Oryza sativa Japonica Group]|EAZ10894.1 hypothetical protein OsJ_00737 [Oryza sati…
LOC_Os01g10030.MSUv7.0	13	3	13	16	31	19	0.231804	0.0553973	0.2251	0.315257	0.53022	0.360433	BAF04210.1	Os01g0196800 [Oryza sativa Japonica Group]|BAG92930.1 unnamed protein product [Oryza sativa Japonica Group]|BAS70867.1 Os01g0196800 [Oryza sativa Japonica Group]
LOC_Os01g10040.MSUv7.0	134	69	108	102	254	216	3.36583	1.79485	2.63431	2.8311	6.11983	5.77211	XP_015611433.1	cytochrome P450 90D2 [Oryza sativa Japonica Group]|Q94IW5.1 RecName: Full=Cytochrome P450 90D2; AltName: Full=C6-oxidase|BAB56089.1 putative cytochrome P450 90C1 [Oryza sativa Japonica Group]|BAF04211.1 Os01g0197100 [Oryza sativa Japonica Group]|BAS70868.1 Os01g0197100 [Oryza sativa Japonica Group]
LOC_Os01g10050.MSUv7.0	802	768	813	618	895	774	16.4698	16.333	16.2129	14.024	17.6301	16.9102	RVX17207.1	DEAD-box ATP-dependent RNA helicase 20 [Vitis vinifera]
LOC_Os01g10070.MSUv7.0	47	37	23	57	76	68	4.88952	3.98621	2.32355	6.55256	7.58402	7.52611	BAD73215.1	hypothetical protein [Oryza sativa Japonica Group]|BAD73322.1 hypothetical protein [Oryza sativa Japonica Group]|EAY72892.1 hypothetical protein OsI_00767 [Oryza sativa Indica Group]
LOC_Os01g10080.MSUv7.0	196	150	178	283	272	202	8.63529	6.84389	7.61546	13.7777	11.495	9.46817	EAY72893.1	hypothetical protein OsI_00768 [Oryza sativa Indica Group]
LOC_Os01g10090.MSUv7.0	17	13	13	12	12	11	0.518154	0.41034	0.384776	0.404165	0.35084	0.356694	BAF04214.2	Os01g0197500 [Oryza sativa Japonica Group]
LOC_Os01g10100.MSUv7.0	221	161	218	165	185	173	8.44469	6.371	8.08915	6.96696	6.7808	7.03284	BAD73218.1	hypothetical protein [Oryza sativa Japonica Group]|BAD73325.1 hypothetical protein [Oryza sativa Japonica Group]
LOC_Os01g10110.MSUv7.0	28	1	6	48	26	40	0.564333	0.0208722	0.117431	1.06902	0.502653	0.857691	XP_015629416.1	cytokinin dehydrogenase 2 [Oryza sativa Japonica Group]|Q4ADV8.1 RecName: Full=Cytokinin dehydrogenase 2; AltName: Full=Cytokinin oxidase 2; Short=OsCKX2; AltName: Full=QTL grain number 1a; Short=Gn1a; Flags: Precursor|BAE16612.1 cytokinin oxidase/dehydrogenase [Oryza sativa Japonica Group]|BAH01708.1 unnamed protein product [Oryza sativa Japonica Group]|BAS70876.1 Os01g0197700 [Oryza sativa Japo…
LOC_Os01g10130.MSUv7.0	3	1	4	2	1	7	0.0914924	0.0315831	0.118462	0.0674003	0.0292537	0.22712	XP_015628356.1	probable RNA-dependent RNA polymerase 3 [Oryza sativa Japonica Group]
LOC_Os01g10140.MSUv7.0	32	22	27	37	67	103	0.745906	0.531064	0.611157	0.953023	1.49805	2.55426	EEC70114.1	hypothetical protein OsI_00773 [Oryza sativa Indica Group]
LOC_Os01g10150.MSUv7.0	3629	3782	3792	3491	4640	3672	76.7007	82.7799	77.8281	81.5324	94.0694	82.5674	BAF04220.1	Os01g0198200, partial [Oryza sativa Japonica Group]
LOC_Os01g10180.MSUv7.0	930	931	953	643	1110	991	38.9644	40.3948	38.7734	29.769	44.6094	44.1726	XP_015634650.1	uncharacterized protein LOC4327339 [Oryza sativa Japonica Group]|BAB56103.1 unknown protein [Oryza sativa Japonica Group]|BAB89415.1 unknown protein [Oryza sativa Japonica Group]|BAF04221.1 Os01g0198500 [Oryza sativa Japonica Group]|EAY72900.1 hypothetical protein OsI_00775 [Oryza sativa Indica Group]|BAS70884.1 Os01g0198500 [Oryza sativa Japonica Group]
LOC_Os01g10195.MSUv7.0	42	60	46	26	40	46	1.76821	2.61594	1.88061	1.20956	1.61534	2.06033	EEC70116.1	hypothetical protein OsI_00776 [Oryza sativa Indica Group]
LOC_Os01g10210.MSUv7.0	25	69	18	6	17	14	1.0742	3.07033	0.751057	0.284881	0.700667	0.63998	XP_015626787.1	lachrymatory-factor synthase [Oryza sativa Japonica Group]|BAB89418.1 unknown protein [Oryza sativa Japonica Group]|BAF04222.1 Os01g0198900 [Oryza sativa Japonica Group]|BAG93971.1 unnamed protein product [Oryza sativa Japonica Group]|BAG87489.1 unnamed protein product [Oryza sativa Japonica Group]|BAS70886.1 Os01g0198900 [Oryza sativa Japonica Group]
LOC_Os01g10230.MSUv7.0	18	7	6	2	2	7	1.05057	0.4231	0.340064	0.128989	0.11197	0.434656	XP_015644871.1	uncharacterized protein LOC107277551 [Oryza sativa Japonica Group]|BAD98616.1 hypothetical protein [Oryza sativa Japonica Group]|BAS70887.1 Os01g0199300 [Oryza sativa Japonica Group]
LOC_Os01g10250.MSUv7.0	587	442	431	599	528	581	7.96111	6.20795	5.67633	8.97698	6.8689	8.38311	XP_015622484.1	uncharacterized protein LOC4327343 [Oryza sativa Japonica Group]|BAD98617.1 monoglyceride lipase isoform 2 -like [Oryza sativa Japonica Group]|BAF04224.1 Os01g0199400 [Oryza sativa Japonica Group]|BAG90935.1 unnamed protein product [Oryza sativa Japonica Group]|EEE54058.1 hypothetical protein OsJ_00752 [Oryza sativa Japonica Group]|BAS70890.1 Os01g0199400 [Oryza sativa Japonica Group]
LOC_Os01g10270.MSUv7.0	0	0	0	0	1	0	0	0	0	0	0.0685798	0	BAD98621.1	hypothetical protein [Oryza sativa Japonica Group]
LOC_Os01g10280.MSUv7.0	1037	988	1099	825	1260	900	19.1322	18.8771	19.6898	16.8193	22.2985	17.6654	XP_015613662.1	phosphoribosylaminoimidazole carboxylase, chloroplastic [Oryza sativa Japonica Group]|BAD73201.1 putative phosphoribosylaminoimidazole carboxylase, chloroplast precursor [Oryza sativa Japonica Group]|BAD98622.1 putative phosphoribosylaminoimidazole carboxylase, chloroplast precursor [Oryza sativa Japonica Group]|BAF04226.1 Os01g0199900 [Oryza sativa Japonica Group]|BAG90789.1 unnamed protein prod…
LOC_Os01g10290.MSUv7.0	510	587	612	486	395	631	17.3961	20.7353	20.2716	18.3184	12.924	22.8984	EEC67434.1	hypothetical protein OsI_34638 [Oryza sativa Indica Group]
LOC_Os01g10300.MSUv7.0	294	321	309	127	334	319	13.6815	15.4698	13.9637	6.53069	14.9091	15.7933	BAD73202.1	hypothetical protein [Oryza sativa Japonica Group]|BAF04228.1 Os01g0200100 [Oryza sativa Japonica Group]|EAY72909.1 hypothetical protein OsI_00783 [Oryza sativa Indica Group]|EAZ10915.1 hypothetical protein OsJ_00757 [Oryza sativa Japonica Group]
LOC_Os01g10310.MSUv7.0	3	7	10	6	12	3	0.304796	0.736507	0.986606	0.673608	1.16947	0.324267	BAH90951.1	Os01g0200200 [Oryza sativa Japonica Group]
LOC_Os01g10320.MSUv7.0	1530	1491	2081	1383	1402	1053	36.9527	37.2926	48.8069	36.91	32.4803	27.0568	BAD73204.1	putative homeobox leucine-zipper protein [Oryza sativa Japonica Group]
LOC_Os01g10340.MSUv7.0	127	104	107	97	117	121	5.65266	4.79372	4.62475	4.77077	4.9952	5.72965	XP_015621944.1	thioredoxin-related transmembrane protein 2 [Oryza sativa Japonica Group]|BAD73205.1 unknown protein [Oryza sativa Japonica Group]|BAF04230.1 Os01g0200400 [Oryza sativa Japonica Group]|BAG96784.1 unnamed protein product [Oryza sativa Japonica Group]|BAS70902.1 Os01g0200400 [Oryza sativa Japonica Group]
LOC_Os01g10350.MSUv7.0	246	228	363	245	241	220	8.65152	8.30392	12.3971	9.5212	8.13004	8.2314	XP_015621943.1	nuclear pore complex protein NUP35 [Oryza sativa Japonica Group]|BAD73206.1 unknown protein [Oryza sativa Japonica Group]|BAF04231.1 Os01g0200500 [Oryza sativa Japonica Group]|BAG90849.1 unnamed protein product [Oryza sativa Japonica Group]|EEE54062.1 hypothetical protein OsJ_00761 [Oryza sativa Japonica Group]|BAS70903.1 Os01g0200500 [Oryza sativa Japonica Group]
LOC_Os01g10390.MSUv7.0	1	2	1	0	0	0	0.0207567	0.0429912	0.0201565	0	0	0	AAX95000.1	transposon protein, putative, CACTA, En/Spm sub-class [Oryza sativa Japonica Group]|ABA95434.1 transposon protein, putative, CACTA, En/Spm sub-class [Oryza sativa Japonica Group]
LOC_Os01g10400.MSUv7.0	3996	5378	8893	3567	4047	4689	170.435	237.545	368.331	168.115	165.571	212.769	ABR26160.1	unknown, partial [Oryza sativa Indica Group]
LOC_Os01g10430.MSUv7.0	594	498	644	570	668	500	10.3682	9.00194	10.9158	10.9941	11.1843	9.28495	XP_015621891.1	probable serine/threonine-protein kinase At1g54610 isoform X1 [Oryza sativa Japonica Group]
LOC_Os01g10440.MSUv7.0	91	151	128	55	34	190	1.99955	3.43604	2.73122	1.33543	0.716618	4.44159	BAF04235.2	Os01g0201100, partial [Oryza sativa Japonica Group]
LOC_Os01g10450.MSUv7.0	1547	1746	2612	714	1103	858	31.0473	36.2885	50.9052	15.8343	21.2338	18.3195	XP_015621252.1	serine/threonine-protein kinase HT1 [Oryza sativa Japonica Group]|BAB92217.1 putative protein kinase [Oryza sativa Japonica Group]|BAF04236.1 Os01g0201200 [Oryza sativa Japonica Group]|EAZ10926.1 hypothetical protein OsJ_00767 [Oryza sativa Japonica Group]|BAS70908.1 Os01g0201200 [Oryza sativa Japonica Group]
LOC_Os01g10460.MSUv7.0	36	33	65	36	21	14	2.44313	2.31926	4.28364	2.6997	1.36704	1.0108	BAD73210.1	hypothetical protein [Oryza sativa Japonica Group]
LOC_Os01g10504.MSUv7.0	0	0	2	0	0	0	0	0	0.0624465	0	0	0	EAY72925.1	hypothetical protein OsI_00797 [Oryza sativa Indica Group]
LOC_Os01g10520.MSUv7.0	149	146	182	77	121	80	2.80155	2.84286	3.32307	1.59982	2.18231	1.60028	BAS70915.1	Os01g0201800 [Oryza sativa Japonica Group]
LOC_Os01g10530.MSUv7.0	2898	2529	2523	1654	2791	2154	46.4608	41.9883	39.2791	29.3017	42.9207	36.7391	XP_015621217.1	uncharacterized protein LOC4327072 [Oryza sativa Japonica Group]
LOC_Os01g10580.MSUv7.0	227	168	154	227	140	136	7.75313	5.94225	5.10772	8.56732	4.58667	4.94178	XP_015630321.1	B-box zinc finger protein 22 [Oryza sativa Japonica Group]|BAF04241.1 Os01g0202500 [Oryza sativa Japonica Group]
LOC_Os01g10590.MSUv7.0	46	61	65	31	18	50	4.70103	6.45589	6.45066	3.50078	1.76452	5.43625	BAS70921.1	Os01g0202700 [Oryza sativa Japonica Group]
LOC_Os01g10600.MSUv7.0	22	53	57	22	10	14	1.03301	2.57721	2.59904	1.14149	0.450402	0.699366	BAF04242.1	Os01g0202800 [Oryza sativa Japonica Group]
LOC_Os01g10610.MSUv7.0	955	926	984	926	802	961	32.3423	32.4765	32.3607	34.6534	26.0531	34.6245	XP_015622415.1	protein BZR1 homolog 2 [Oryza sativa Japonica Group]|Q0JPT4.1 RecName: Full=Protein BZR1 homolog 2; Short=OsBZR2; AltName: Full=Protein BRASSINAZOLE-RESISTANT 1 homolog 2|BAF04244.1 Os01g0203000, partial [Oryza sativa Japonica Group]|BAS70923.1 Os01g0203000, partial [Oryza sativa Japonica Group]
LOC_Os01g10630.MSUv7.0	108	112	162	96	113	92	2.83576	3.04547	4.13062	2.78538	2.84604	2.56996	XP_015623073.1	uncharacterized protein LOC4327077 [Oryza sativa Japonica Group]|XP_015623088.1 uncharacterized protein LOC4327077 [Oryza sativa Japonica Group]|BAD72980.1 unknown protein [Oryza sativa Japonica Group]|BAD73179.1 unknown protein [Oryza sativa Japonica Group]|BAF04245.1 Os01g0203300 [Oryza sativa Japonica Group]|BAG97683.1 unnamed protein product [Oryza sativa Japonica Group]|EEE54075.1 hypothetic…
LOC_Os01g10640.MSUv7.0	2	5	0	32	17	45	0.12901	0.334007	0	2.28093	1.05187	3.08816	LOC_Os01g10640.MSUv7.0	-
LOC_Os01g10670.MSUv7.0	0	0	0	0	3	0	0	0	0	0	0.480718	0	LOC_Os01g10670.MSUv7.0	-
LOC_Os01g10680.MSUv7.0	485	486	522	748	761	1002	11.2648	11.6899	11.7736	19.1978	16.9545	24.7596	XP_025879533.1	protein GRAVITROPIC IN THE LIGHT 1 [Oryza sativa Japonica Group]|BAA92948.1 unknown protein [Oryza sativa Japonica Group]|BAF04247.1 Os01g0203800 [Oryza sativa Japonica Group]|BAG94523.1 unnamed protein product [Oryza sativa Japonica Group]|BAG95104.1 unnamed protein product [Oryza sativa Japonica Group]|BAS70928.1 Os01g0203800 [Oryza sativa Japonica Group]
LOC_Os01g10690.MSUv7.0	98	95	81	131	126	231	2.29151	2.30043	1.83923	3.38481	2.82608	5.74647	BAS70931.1	Os01g0204000, partial [Oryza sativa Japonica Group]
LOC_Os01g10700.MSUv7.0	43	29	44	8	29	18	0.994748	0.694757	0.988445	0.204504	0.643518	0.443007	BAD72985.1	putative S-receptor kinase [Oryza sativa Japonica Group]
LOC_Os01g10710.MSUv7.0	7	11	10	0	5	12	0.143751	0.233936	0.19942	0	0.0984922	0.262174	XP_015644335.1	G-type lectin S-receptor-like serine/threonine-protein kinase SD2-5 [Oryza sativa Japonica Group]|BAA92954.1 S-receptor kinase -like [Oryza sativa Japonica Group]|EAZ10953.1 hypothetical protein OsJ_00796 [Oryza sativa Japonica Group]
LOC_Os01g10750.MSUv7.0	0	0	0	0	0	2	0	0	0	0	0	0.30054	BAD72987.1	hypothetical protein [Oryza sativa Japonica Group]|EAZ10958.1 hypothetical protein OsJ_00801 [Oryza sativa Japonica Group]
LOC_Os01g10780.MSUv7.0	0	0	0	0	2	5	0	0	0	0	0.239783	0.664865	BAA92960.1	hypothetical protein [Oryza sativa Japonica Group]|EAY72946.1 hypothetical protein OsI_00818 [Oryza sativa Indica Group]|EAZ10961.1 hypothetical protein OsJ_00804 [Oryza sativa Japonica Group]|BAS70935.1 Os01g0205000 [Oryza sativa Japonica Group]
LOC_Os01g10790.MSUv7.0	769	703	755	591	730	690	23.7022	22.4392	22.5977	20.1288	21.5826	22.6258	XP_015621749.1	WD repeat-containing protein 53 isoform X1 [Oryza sativa Japonica Group]
LOC_Os01g10800.MSUv7.0	36	35	28	16	33	36	0.567208	0.571083	0.428404	0.278566	0.498737	0.603443	XP_015621748.1	pentatricopeptide repeat-containing protein DOT4, chloroplastic [Oryza sativa Japonica Group]
LOC_Os01g10810.MSUv7.0	0	0	1	0	0	0	0	0	0.0594746	0	0	0	XP_015643102.1	uncharacterized protein LOC4327085 isoform X2 [Oryza sativa Japonica Group]|EEC70137.1 hypothetical protein OsI_00824 [Oryza sativa Indica Group]|BAS70938.1 Os01g0205300 [Oryza sativa Japonica Group]
LOC_Os01g10820.MSUv7.0	1152	1231	1532	1291	1190	1090	109.367	121.027	141.237	135.434	108.367	110.091	TEY21202.1	large subunit ribosomal protein L11e [Salvia splendens]
LOC_Os01g10830.MSUv7.0	257	278	213	533	460	510	14.9999	16.8031	12.0723	34.3755	25.7531	31.6678	XP_015617787.1	enoyl-CoA delta isomerase 2, peroxisomal [Oryza sativa Japonica Group]|BAA92965.1 carnitine racemase -like [Oryza sativa Japonica Group]|BAF04254.1 Os01g0205600 [Oryza sativa Japonica Group]|EAY72955.1 hypothetical protein OsI_00827 [Oryza sativa Indica Group]|BAG90559.1 unnamed protein product [Oryza sativa Japonica Group]|BAS70940.1 Os01g0205600 [Oryza sativa Japonica Group]
LOC_Os01g10840.MSUv7.0	2123	1734	2042	1610	1665	1450	59.941	50.7007	55.9867	50.2305	45.0927	43.5548	XP_008672878.1	shaggy-related protein kinase eta isoform X1 [Zea mays]|ACN32041.1 unknown [Zea mays]|ONM28579.1 Shaggy-related protein kinase iota [Zea mays]
LOC_Os01g10850.MSUv7.0	13	21	6	28	2	25	0.406212	0.679547	0.182061	0.966798	0.0599456	0.831081	XP_015632330.1	peroxidase P7 [Oryza sativa Japonica Group]|BAD72993.1 putative bacterial-induced peroxidase precursor [Oryza sativa Japonica Group]|BAF04256.1 Os01g0205900 [Oryza sativa Japonica Group]|BAG97450.1 unnamed protein product [Oryza sativa Japonica Group]|BAG87539.1 unnamed protein product [Oryza sativa Japonica Group]|BAS70942.1 Os01g0205900 [Oryza sativa Japonica Group]
LOC_Os01g10860.MSUv7.0	163	129	188	141	188	180	7.64679	6.26718	8.56455	7.30935	8.45994	8.98375	XP_015629758.1	uncharacterized protein LOC4327091 [Oryza sativa Japonica Group]|BAA92969.1 unknown protein [Oryza sativa Japonica Group]|BAG95741.1 unnamed protein product [Oryza sativa Japonica Group]|EEC70140.1 hypothetical protein OsI_00830 [Oryza sativa Indica Group]|BAS70943.1 Os01g0206200 [Oryza sativa Japonica Group]
LOC_Os01g10870.MSUv7.0	5	2	3	5	0	1	0.169662	0.0702806	0.0988533	0.187479	0	0.0361001	XP_015621590.1	putative CBL-interacting protein kinase 13 [Oryza sativa Japonica Group]|Q5QNM6.1 RecName: Full=Putative CBL-interacting protein kinase 13; AltName: Full=OsCIPK13|BAD72994.1 putative wpk4 protein kinase [Oryza sativa Japonica Group]|BAD73090.1 putative wpk4 protein kinase [Oryza sativa Japonica Group]|BAS70944.1 Os01g0206300 [Oryza sativa Japonica Group]
LOC_Os01g10880.MSUv7.0	155	150	182	159	176	130	40.8011	40.8905	46.5229	46.2493	44.4397	36.4064	LOC_Os01g10880.MSUv7.0	-
LOC_Os01g10890.MSUv7.0	78	66	80	44	105	66	1.97252	1.72847	1.96459	1.22956	2.54703	1.77568	XP_015621591.1	CBL-interacting protein kinase 5 [Oryza sativa Japonica Group]|Q9LWM4.1 RecName: Full=CBL-interacting protein kinase 5; AltName: Full=OsCIPK05|BAA92972.1 putative CBL-interacting protein kinase 2 [Oryza sativa Japonica Group]|BAB92151.1 putative CBL-interacting protein kinase 2 [Oryza sativa Japonica Group]|BAF04259.1 Os01g0206700 [Oryza sativa Japonica Group]|EAY72961.1 hypothetical protein OsI_…
LOC_Os01g10900.MSUv7.0	39	13	27	15	24	10	0.716997	0.247507	0.482027	0.304728	0.423235	0.19559	XP_015632873.1	protein MALE DISCOVERER 2 isoform X2 [Oryza sativa Japonica Group]|AAQ01158.1 transmembrane kinase [Oryza sativa Japonica Group]|EEC70141.1 hypothetical protein OsI_00834 [Oryza sativa Indica Group]|EEE54083.1 hypothetical protein OsJ_00816 [Oryza sativa Japonica Group]
LOC_Os01g10920.MSUv7.0	1	1	2	0	4	0	0.0281578	0.0291602	0.0546871	0	0.108038	0	XP_025878314.1	peptide-N4-(N-acetyl-beta-glucosaminyl)asparagine amidase A-like, partial [Oryza sativa Japonica Group]
LOC_Os01g10930.MSUv7.0	18	16	20	10	8	6	0.411475	0.378775	0.443973	0.252603	0.17542	0.14592	XP_025879566.1	peptide-N4-(N-acetyl-beta-glucosaminyl)asparagine amidase A [Oryza sativa Japonica Group]|BAB92155.1 unknown protein [Oryza sativa Japonica Group]|BAF04262.1 Os01g0207200 [Oryza sativa Japonica Group]|EAY72963.1 hypothetical protein OsI_00835 [Oryza sativa Indica Group]|BAG96030.1 unnamed protein product [Oryza sativa Japonica Group]|BAS70951.1 Os01g0207200 [Oryza sativa Japonica Group]
LOC_Os01g10950.MSUv7.0	681	415	450	526	317	428	14.6427	9.24085	9.39595	12.4976	6.53808	9.79063	XP_025879570.1	peptide-N4-(N-acetyl-beta-glucosaminyl)asparagine amidase A-like [Oryza sativa Japonica Group]|BAB92157.1 hypothetical protein [Oryza sativa Japonica Group]|EAY72965.1 hypothetical protein OsI_00837 [Oryza sativa Indica Group]
LOC_Os01g10960.MSUv7.0	7	3	2	2	5	0	0.198391	0.0880513	0.0550439	0.0626357	0.135929	0	XP_025879567.1	peptide-N4-(N-acetyl-beta-glucosaminyl)asparagine amidase A [Oryza sativa Japonica Group]|BAF04265.1 Os01g0207600 [Oryza sativa Japonica Group]|EAY72966.1 hypothetical protein OsI_00838 [Oryza sativa Indica Group]|EAZ10978.1 hypothetical protein OsJ_00821 [Oryza sativa Japonica Group]
LOC_Os01g10980.MSUv7.0	1	0	1	0	4	0	0.0451257	0	0.0438207	0	0.173142	0	XP_015635051.1	WAT1-related protein At5g64700 [Oryza sativa Japonica Group]
LOC_Os01g10990.MSUv7.0	0	0	0	0	0	1	0	0	0	0	0	0.0355675	XP_015635457.1	WAT1-related protein At5g64700 [Oryza sativa Japonica Group]
LOC_Os01g11010.MSUv7.0	123	152	259	74	84	99	3.106	3.97494	6.35113	2.06488	2.03467	2.65965	XP_015631318.1	peptide-N4-(N-acetyl-beta-glucosaminyl)asparagine amidase A [Oryza sativa Japonica Group]|BAB92167.1 unknown protein [Oryza sativa Japonica Group]|BAF04270.1 Os01g0208400 [Oryza sativa Japonica Group]|EAY72972.1 hypothetical protein OsI_00844 [Oryza sativa Indica Group]|EAZ10987.1 hypothetical protein OsJ_00830 [Oryza sativa Japonica Group]|BAG97348.1 unnamed protein product [Oryza sativa Japonic…
LOC_Os01g11020.MSUv7.0	44	28	32	16	21	37	4.0446	2.66545	2.85646	1.62521	1.85165	3.61841	XP_015636807.1	class E basic helix-loop-helix protein 22 [Oryza sativa Japonica Group]|BAD73099.1 hypothetical protein [Oryza sativa Japonica Group]
LOC_Os01g11040.MSUv7.0	1415	1178	1294	1003	1197	1104	15.7822	13.6065	14.0152	12.3617	12.8062	13.1	XP_025879577.1	SCAR-like protein 2 isoform X1 [Oryza sativa Japonica Group]
LOC_Os01g11054.MSUv7.0	1942	1923	2102	1516	2063	1830	21.1619	21.7008	22.243	18.2546	21.5637	21.2153	EAY72974.1	hypothetical protein OsI_00846 [Oryza sativa Indica Group]
LOC_Os01g11070.MSUv7.0	626	550	684	520	679	585	14.3732	13.0778	15.2508	13.1932	14.9543	14.2899	XP_015622056.1	dol-P-Man:Man(6)GlcNAc(2)-PP-Dol alpha-1,2-mannosyltransferase [Oryza sativa Japonica Group]|BAD73103.1 putative disrupted in bipolar disorder 1 [Oryza sativa Japonica Group]|BAF04274.1 Os01g0209000 [Oryza sativa Japonica Group]|BAG96211.1 unnamed protein product [Oryza sativa Japonica Group]|BAH01415.1 unnamed protein product [Oryza sativa Japonica Group]|EEE54091.1 hypothetical protein OsJ_0083…
LOC_Os01g11110.MSUv7.0	298	295	315	338	449	359	11.5996	11.8915	11.9067	14.5382	16.7645	14.8667	AAN60494.1	Putative Zea mays retrotransposon Opie-2 [Oryza sativa Japonica Group]
LOC_Os01g11120.MSUv7.0	840	914	1159	488	478	523	28.1188	31.685	37.6752	18.0511	15.3484	18.6257	XP_015621620.1	polyadenylate-binding protein-interacting protein 9 [Oryza sativa Japonica Group]|BAD73038.1 RNA-binding protein -like [Oryza sativa Japonica Group]|BAD73106.1 RNA-binding protein -like [Oryza sativa Japonica Group]|BAF04276.1 Os01g0209400 [Oryza sativa Japonica Group]|BAG96212.1 unnamed protein product [Oryza sativa Japonica Group]|BAS70970.1 Os01g0209400 [Oryza sativa Japonica Group]
LOC_Os01g11130.MSUv7.0	7	5	4	6	16	8	0.120251	0.088951	0.0667276	0.113896	0.26365	0.146209	XP_015632103.1	uncharacterized protein LOC4325536 [Oryza sativa Japonica Group]
LOC_Os01g11150.MSUv7.0	6	9	12	1	3	4	0.234073	0.363607	0.454607	0.0431089	0.112263	0.166017	EAZ10994.1	hypothetical protein OsJ_00839 [Oryza sativa Japonica Group]
LOC_Os01g11160.MSUv7.0	113	110	71	47	12	31	2.6783	2.7	1.63416	1.23097	0.272822	0.781692	XP_015621666.1	cationic amino acid transporter 5 [Oryza sativa Japonica Group]|BAA96139.1 putative amino acid permease [Oryza sativa Japonica Group]|BAA96181.1 putative amino acid permease [Oryza sativa Japonica Group]|BAF04279.1 Os01g0209800 [Oryza sativa Japonica Group]|EAY72982.1 hypothetical protein OsI_00855 [Oryza sativa Indica Group]|EAZ10995.1 hypothetical protein OsJ_00840 [Oryza sativa Japonica Group]…
LOC_Os01g11170.MSUv7.0	0	0	1	0	0	0	0	0	0.11881	0	0	0	BAD73020.1	hypothetical protein [Oryza sativa Japonica Group]|BAD73042.1 hypothetical protein [Oryza sativa Japonica Group]
LOC_Os01g11210.MSUv7.0	14	6	17	18	5	6	0.72461	0.321602	0.854438	1.02948	0.248236	0.330386	XP_015635607.1	uncharacterized protein LOC4325539 [Oryza sativa Japonica Group]|BAF04280.1 Os01g0210300 [Oryza sativa Japonica Group]|BAG97885.1 unnamed protein product [Oryza sativa Japonica Group]|BAS70981.1 Os01g0210300 [Oryza sativa Japonica Group]
LOC_Os01g11220.MSUv7.0	2	1	8	8	4	1	0.0627576	0.0324958	0.243771	0.277392	0.120397	0.0333833	BAA96145.1	hypothetical protein [Oryza sativa Japonica Group]|BAA96187.1 hypothetical protein [Oryza sativa Japonica Group]|BAF04281.1 Os01g0210400 [Oryza sativa Japonica Group]|BAS70982.1 Os01g0210400 [Oryza sativa Japonica Group]
LOC_Os01g11230.MSUv7.0	22	43	55	52	26	41	1.08687	2.19995	2.63859	2.83873	1.2321	2.15492	XP_015614111.1	heme-binding protein 2 [Oryza sativa Japonica Group]|BAA96146.1 putative heme binding protein 2 [Oryza sativa Japonica Group]|BAA96188.1 putative heme binding protein 2 [Oryza sativa Japonica Group]|BAF04282.1 Os01g0210500 [Oryza sativa Japonica Group]|EAY72986.1 hypothetical protein OsI_00859 [Oryza sativa Indica Group]|EAZ11000.1 hypothetical protein OsJ_00844 [Oryza sativa Japonica Group]|BAG9…
LOC_Os01g11240.MSUv7.0	34	43	49	4	7	4	1.52898	2.00254	2.1398	0.19877	0.301952	0.191371	XP_015614119.1	uncharacterized protein LOC4325559 [Oryza sativa Japonica Group]|BAA96147.1 unknown protein [Oryza sativa Japonica Group]|BAA96189.1 unknown protein [Oryza sativa Japonica Group]|BAF04283.1 Os01g0210600 [Oryza sativa Japonica Group]|BAG99781.1 unnamed protein product [Oryza sativa Japonica Group]|BAS70985.1 Os01g0210600 [Oryza sativa Japonica Group]
LOC_Os01g11250.MSUv7.0	106	106	155	87	125	106	2.45326	2.54059	3.48357	2.22497	2.77501	2.60998	XP_015614092.1	potassium channel KAT2 isoform X1 [Oryza sativa Japonica Group]|Q5QNI1.2 RecName: Full=Potassium channel KAT2
LOC_Os01g11260.MSUv7.0	256	234	405	150	111	163	7.47912	7.07974	11.49	4.8425	3.11065	5.06631	XP_015625791.1	phospho-N-acetylmuramoyl-pentapeptide-transferase homolog isoform X1 [Oryza sativa Japonica Group]
LOC_Os01g11270.MSUv7.0	1	0	4	0	0	1	0.0288116	0	0.111913	0	0	0.0306521	XP_015625810.1	cytochrome P450 710A1 [Oryza sativa Japonica Group]|BAA96151.1 sterol C-22 desaturase -like [Oryza sativa Japonica Group]|BAA96193.1 sterol C-22 desaturase -like [Oryza sativa Japonica Group]|BAF04286.1 Os01g0210900 [Oryza sativa Japonica Group]|EAY72990.1 hypothetical protein OsI_00863 [Oryza sativa Indica Group]|EAZ11004.1 hypothetical protein OsJ_00848 [Oryza sativa Japonica Group]|BAG92340.1 …
LOC_Os01g11340.MSUv7.0	93	151	152	103	100	95	2.39485	4.02683	3.80097	2.9309	2.47009	2.60263	XP_015648135.1	cytochrome P450 710A1 [Oryza sativa Japonica Group]|BAA96158.1 sterol C-22 desaturase -like [Oryza sativa Japonica Group]|BAA96200.1 sterol C-22 desaturase -like [Oryza sativa Japonica Group]|EAZ11008.1 hypothetical protein OsJ_00852 [Oryza sativa Japonica Group]
LOC_Os01g11350.MSUv7.0	15	8	10	20	1	8	0.527176	0.291169	0.341287	0.776716	0.0337118	0.299122	Q5QNI5.1	RecName: Full=Basic leucine zipper 2; Short=OsbZIP02; Short=bZIP protein 2|BAD73033.1 bZIP transcription factor RF2b -like [Oryza sativa Japonica Group]|BAF04289.1 Os01g0211800 [Oryza sativa Japonica Group]|BAS70994.1 Os01g0211800 [Oryza sativa Japonica Group]
LOC_Os01g11360.MSUv7.0	1	4	6	5	3	1	0.107909	0.447002	0.628731	0.596206	0.310526	0.114803	BAF04290.1	Os01g0212000, partial [Oryza sativa Japonica Group]|BAS70995.1 Os01g0212000, partial [Oryza sativa Japonica Group]
LOC_Os01g11370.MSUv7.0	3089	3038	2534	2204	3413	2844	61.6619	62.8025	49.1203	48.6159	65.3511	60.3979	XP_015622104.1	probable pre-mRNA-splicing factor ATP-dependent RNA helicase DEAH9 [Oryza sativa Japonica Group]|XP_015622105.1 probable pre-mRNA-splicing factor ATP-dependent RNA helicase DEAH9 [Oryza sativa Japonica Group]|BAD73035.1 putative DEAH (Asp-Glu-Ala-His) box polypeptide 35 [Oryza sativa Japonica Group]|BAF04291.1 Os01g0212100 [Oryza sativa Japonica Group]|BAG95074.1 unnamed protein product [Oryza sa…
LOC_Os01g11390.MSUv7.0	0	0	1	0	0	0	0	0	0.124051	0	0	0	EAY72999.1	hypothetical protein OsI_00871 [Oryza sativa Indica Group]|EAZ11012.1 hypothetical protein OsJ_00856 [Oryza sativa Japonica Group]
LOC_Os01g11400.MSUv7.0	73	62	60	97	138	132	15.5933	13.7151	12.4458	22.8958	28.2757	29.9974	LOC_Os01g11400.MSUv7.0	-
LOC_Os01g11414.MSUv7.0	2814	2010	1914	2417	1601	2038	69.7414	51.5885	46.0642	66.1928	38.0606	53.7359	XP_015621883.1	sodium/calcium exchanger NCL1 [Oryza sativa Japonica Group]|Q5QNI2.1 RecName: Full=Sodium/calcium exchanger NCL1; AltName: Full=Na(+)/Ca(2+)-exchange protein NCL1; AltName: Full=OsEFCAX1; AltName: Full=Protein NCX-like 1; Short=OsNCL1|BAD73036.1 unknown protein [Oryza sativa Japonica Group]|BAF04292.1 Os01g0212400 [Oryza sativa Japonica Group]|BAG89983.1 unnamed protein product [Oryza sativa Japo…
LOC_Os01g11430.MSUv7.0	7	4	4	0	0	0	0.195416	0.115641	0.108437	0	0	0	BAS70999.1	Os01g0212500 [Oryza sativa Japonica Group]
LOC_Os01g11460.MSUv7.0	23	35	36	33	10	24	0.818269	1.28952	1.24373	1.29733	0.34126	0.908391	BAS71000.1	Os01g0212700, partial [Oryza sativa Japonica Group]
LOC_Os01g11470.MSUv7.0	14	11	13	22	12	23	2.06125	1.6772	1.85866	3.57926	1.69473	3.60266	BAD73150.1	hypothetical protein [Oryza sativa Japonica Group]
LOC_Os01g11480.MSUv7.0	2	1	1	0	0	3	0.208064	0.107735	0.101024	0	0	0.332034	XP_015649096.1	RING-H2 finger protein ATL39 [Oryza sativa Japonica Group]|BAD73151.1 hypothetical protein [Oryza sativa Japonica Group]|BAF04295.2 Os01g0213000 [Oryza sativa Japonica Group]
LOC_Os01g11500.MSUv7.0	2	0	0	4	0	0	0.14849	0	0	0.328168	0	0	XP_015649256.1	RING-H2 finger protein ATL39 [Oryza sativa Japonica Group]|BAD73152.1 hypothetical protein [Oryza sativa Japonica Group]
LOC_Os01g11520.MSUv7.0	157	165	216	234	83	154	6.58846	7.17065	8.80224	10.851	3.34103	6.87541	XP_015649328.1	RING-H2 finger protein ATL46 [Oryza sativa Japonica Group]|BAB55721.1 ring-H2 zinc finger protein-like [Oryza sativa Japonica Group]|BAF04296.1 Os01g0213400 [Oryza sativa Japonica Group]|EAZ11017.1 hypothetical protein OsJ_00862 [Oryza sativa Japonica Group]|BAG90743.1 unnamed protein product [Oryza sativa Japonica Group]|BAS71005.1 Os01g0213400 [Oryza sativa Japonica Group]
LOC_Os01g11550.MSUv7.0	86	63	154	72	76	55	1.81251	1.37503	3.15179	1.6768	1.53643	1.23321	BAD73155.1	transcription factor PCF5 [Oryza sativa Japonica Group]
LOC_Os01g11570.MSUv7.0	750	925	1210	936	991	932	34.6851	44.3011	54.3404	47.8328	43.9616	45.8555	EAZ30018.1	hypothetical protein OsJ_14076 [Oryza sativa Japonica Group]
LOC_Os01g11580.MSUv7.0	865	909	969	879	1029	1027	23.7034	25.7958	25.7854	26.6166	27.0476	29.9405	XP_015648093.1	transcription factor GTE3, chloroplastic isoform X1 [Oryza sativa Japonica Group]
LOC_Os01g11590.MSUv7.0	365	451	423	387	323	443	10.7237	13.7221	12.0683	12.5641	9.10275	13.8468	XP_015648114.1	uncharacterized protein LOC9269554 [Oryza sativa Japonica Group]|BAD73001.1 unknown protein [Oryza sativa Japonica Group]|BAD73159.1 unknown protein [Oryza sativa Japonica Group]|EEE54107.1 hypothetical protein OsJ_00866 [Oryza sativa Japonica Group]
LOC_Os01g11600.MSUv7.0	163	201	316	370	181	374	36.3059	46.3635	68.349	91.0667	38.6711	88.6247	XP_002457141.1	uncharacterized protein LOC8081414 [Sorghum bicolor]|EES02261.1 hypothetical protein SORBI_3003G019200 [Sorghum bicolor]
LOC_Os01g11620.MSUv7.0	9	3	25	3	4	7	0.293911	0.101458	0.792808	0.108258	0.1253	0.2432	EEC70166.1	hypothetical protein OsI_00887 [Oryza sativa Indica Group]
LOC_Os01g11650.MSUv7.0	816	1156	1823	658	553	995	11.8139	17.3321	25.6298	10.5268	7.67973	15.3257	BAS71015.1	Os01g0214800 [Oryza sativa Japonica Group]
LOC_Os01g11660.MSUv7.0	0	0	3	0	0	0	0	0	0.117159	0	0	0	BAF04307.2	Os01g0215000, partial [Oryza sativa Japonica Group]|BAS71017.1 Os01g0215000, partial [Oryza sativa Japonica Group]
LOC_Os01g11700.MSUv7.0	1	0	2	0	0	3	0.0320739	0	0.0622928	0	0	0.102369	EEC70171.1	hypothetical protein OsI_00893 [Oryza sativa Indica Group]
LOC_Os01g11710.MSUv7.0	7	10	14	6	12	13	0.196362	0.290503	0.381367	0.185986	0.322893	0.387969	XP_015632733.1	GDSL esterase/lipase At5g45910 [Oryza sativa Japonica Group]|BAF04310.1 Os01g0215700 [Oryza sativa Japonica Group]|BAG87737.1 unnamed protein product [Oryza sativa Japonica Group]|BAG86888.1 unnamed protein product [Oryza sativa Japonica Group]|BAS71022.1 Os01g0215700 [Oryza sativa Japonica Group]
LOC_Os01g11730.MSUv7.0	0	0	3	0	0	0	0	0	0.095496	0	0	0	XP_015629807.1	GDSL esterase/lipase At5g45910 [Oryza sativa Japonica Group]|BAA94224.1 putative esterase [Oryza sativa Japonica Group]|BAF04311.1 Os01g0216000 [Oryza sativa Japonica Group]|EAZ11033.1 hypothetical protein OsJ_00877 [Oryza sativa Japonica Group]|BAG96688.1 unnamed protein product [Oryza sativa Japonica Group]|BAG86688.1 unnamed protein product [Oryza sativa Japonica Group]|BAS71026.1 Os01g0216000…
LOC_Os01g11750.MSUv7.0	0	0	2	0	0	2	0	0	0.088099	0	0	0.0965182	XP_015642359.1	GDSL esterase/lipase At5g45910 [Oryza sativa Japonica Group]|BAA94220.1 putative esterase [Oryza sativa Japonica Group]|BAF04313.1 Os01g0216400 [Oryza sativa Japonica Group]|EAY73027.1 hypothetical protein OsI_00898 [Oryza sativa Indica Group]|BAS71030.1 Os01g0216400 [Oryza sativa Japonica Group]
LOC_Os01g11760.MSUv7.0	3	0	6	4	0	3	0.113141	0	0.219738	0.166696	0	0.120368	EAZ11036.1	hypothetical protein OsJ_00880 [Oryza sativa Japonica Group]
LOC_Os01g11770.MSUv7.0	2	0	0	0	0	0	0.217167	0	0	0	0	0	BAD73015.1	hypothetical protein [Oryza sativa Japonica Group]
LOC_Os01g11810.MSUv7.0	513	403	472	338	401	226	15.089	12.2755	13.4815	10.9857	11.3137	7.07203	XP_015629528.1	protein trichome birefringence-like 41 isoform X1 [Oryza sativa Japonica Group]
LOC_Os01g11820.MSUv7.0	14	6	17	16	14	22	0.713277	0.316572	0.841074	0.900778	0.684189	1.19247	XP_025879677.1	probable purine permease 11 isoform X1 [Oryza sativa Japonica Group]
LOC_Os01g11850.MSUv7.0	0	1	0	0	0	0	0	0.0389996	0	0	0	0	EAY73033.1	hypothetical protein OsI_00906 [Oryza sativa Indica Group]|EEE54116.1 hypothetical protein OsJ_00886 [Oryza sativa Japonica Group]
LOC_Os01g11860.MSUv7.0	3	2	0	2	8	1	0.104102	0.0718715	0	0.0766891	0.266283	0.0369172	EAZ11044.1	hypothetical protein OsJ_00888 [Oryza sativa Japonica Group]
LOC_Os01g11870.MSUv7.0	0	5	2	3	1	0	0	0.538677	0.202047	0.344871	0.0997897	0	EEE56829.1	hypothetical protein OsJ_06431 [Oryza sativa Japonica Group]
LOC_Os01g11880.MSUv7.0	350	493	545	374	488	468	8.45322	12.3308	12.7822	9.98145	11.3056	12.0252	EEC70182.1	hypothetical protein OsI_00911 [Oryza sativa Indica Group]
LOC_Os01g11900.MSUv7.0	2824	2626	2768	1779	2330	2396	22.7351	21.8937	21.6399	15.8262	17.9931	20.5217	XP_015650531.1	protein ROS1 [Oryza sativa Japonica Group]|XP_015650539.1 protein ROS1 [Oryza sativa Japonica Group]|C7IW64.2 RecName: Full=Protein ROS1A; AltName: Full=Protein REPRESSOR OF SILENCING 1 homolog a; AltName: Full=Protein ROS1 homolog; Short=OsROS1; AltName: Full=Protein THICK ALEURONE 2
LOC_Os01g11910.MSUv7.0	1125	1153	1231	1107	1602	1288	27.2215	28.8922	28.925	29.5989	37.1827	33.1566	XP_025879685.1	transcription factor bHLH30 [Oryza sativa Japonica Group]|BAB16490.1 DNA binding protein-like [Oryza sativa Japonica Group]|BAC00537.1 DNA binding protein-like [Oryza sativa Japonica Group]|BAF04323.1 Os01g0218100 [Oryza sativa Japonica Group]|EAY73039.1 hypothetical protein OsI_00913 [Oryza sativa Indica Group]|BAS71047.1 Os01g0218100 [Oryza sativa Japonica Group]
LOC_Os01g11946.MSUv7.0	308	314	349	315	319	427	5.44724	5.75103	5.99386	6.15608	5.41171	8.03428	XP_015611868.1	ABC transporter D family member 2, chloroplastic isoform X2 [Oryza sativa Japonica Group]
LOC_Os01g11952.MSUv7.0	787	730	887	539	657	749	11.2103	10.7685	12.2694	8.48399	8.9769	11.3506	XP_015611850.1	histone-lysine N-methyltransferase ATX5 [Oryza sativa Japonica Group]|BAD81417.1 putative trithorax 3 [Oryza sativa Japonica Group]|BAF04328.1 Os01g0218800 [Oryza sativa Japonica Group]|BAS71055.1 Os01g0218800 [Oryza sativa Japonica Group]
LOC_Os01g11960.MSUv7.0	368	347	386	353	378	408	9.36991	9.14972	9.544	9.93186	9.23204	11.052	XP_015611881.1	histone-lysine N-methyltransferase ATX3 [Oryza sativa Japonica Group]|BAD81418.1 unknown protein [Oryza sativa Japonica Group]|EEE54125.1 hypothetical protein OsJ_00898 [Oryza sativa Japonica Group]|BAF04329.2 Os01g0218900 [Oryza sativa Japonica Group]|BAS71057.1 Os01g0218900 [Oryza sativa Japonica Group]
LOC_Os01g11970.MSUv7.0	102	98	144	83	88	87	5.4027	5.37561	7.40676	4.85799	4.47107	4.90257	XP_015633710.1	uncharacterized protein LOC4324590 [Oryza sativa Japonica Group]|BAA96201.1 hypothetical protein [Oryza sativa Japonica Group]|BAC00545.1 hypothetical protein [Oryza sativa Japonica Group]|BAF04330.1 Os01g0219000 [Oryza sativa Japonica Group]|BAS71058.1 Os01g0219000 [Oryza sativa Japonica Group]
LOC_Os01g11980.MSUv7.0	162	139	172	149	153	87	10.4888	9.31999	10.8142	10.6602	9.50209	5.9927	BAD81353.1	hypothetical protein [Oryza sativa Japonica Group]|BAD81419.1 hypothetical protein [Oryza sativa Japonica Group]
LOC_Os01g11990.MSUv7.0	20	24	37	27	55	32	0.746173	0.927281	1.3405	1.11312	1.96829	1.27014	BAD81354.1	unknown protein [Oryza sativa Japonica Group]|BAD81420.1 unknown protein [Oryza sativa Japonica Group]|EEE54127.1 hypothetical protein OsJ_00901 [Oryza sativa Japonica Group]
LOC_Os01g12000.MSUv7.0	1003	1403	1201	601	1167	1414	42.5358	61.6172	49.4598	28.1641	47.4725	63.7965	XP_015628408.1	uncharacterized protein LOC4324639 [Oryza sativa Japonica Group]|BAF04333.1 Os01g0219300 [Oryza sativa Japonica Group]|BAG93335.1 unnamed protein product [Oryza sativa Japonica Group]|BAS71061.1 Os01g0219300 [Oryza sativa Japonica Group]
LOC_Os01g12020.MSUv7.0	10	2	4	2	4	2	0.264704	0.0548253	0.102819	0.0585003	0.101564	0.0563227	XP_015642063.1	endoglucanase 1 [Oryza sativa Japonica Group]|Q5NAT8.1 RecName: Full=Endoglucanase 1; AltName: Full=Endo-1,4-beta glucanase 1; AltName: Full=OsCel9B; AltName: Full=OsGLU7; Flags: Precursor|BAD81358.1 putative endo-beta-1,4-glucanase [Oryza sativa Japonica Group]|BAD81424.1 putative endo-beta-1,4-glucanase [Oryza sativa Japonica Group]|BAF04335.1 Os01g0219600 [Oryza sativa Japonica Group]|EAZ11062…
LOC_Os01g12070.MSUv7.0	1	11	1	21	2	18	0.0221505	0.252329	0.0215099	0.514009	0.0424944	0.42418	XP_015621149.1	endoglucanase 2 [Oryza sativa Japonica Group]|Q5NAT0.1 RecName: Full=Endoglucanase 2; AltName: Full=Endo-1,4-beta glucanase 2; AltName: Full=OsCel9A; AltName: Full=OsGLU5; Flags: Precursor|BAD81360.1 putative endo-beta-1,4-glucanase [Oryza sativa Japonica Group]|BAD81426.1 putative endo-beta-1,4-glucanase [Oryza sativa Japonica Group]|BAF04337.1 Os01g0220100 [Oryza sativa Japonica Group]|BAF37260…
LOC_Os01g12080.MSUv7.0	533	518	702	499	582	493	13.03	13.1141	16.6652	13.4799	13.6477	12.8221	EAZ11065.1	hypothetical protein OsJ_00910 [Oryza sativa Japonica Group]
LOC_Os01g12090.MSUv7.0	420	402	480	312	424	293	35.2503	34.9406	39.1211	28.9359	34.1348	26.1623	EEC70191.1	hypothetical protein OsI_00930 [Oryza sativa Indica Group]|EEE54129.1 hypothetical protein OsJ_00911 [Oryza sativa Japonica Group]
LOC_Os01g12100.MSUv7.0	1204	1145	1336	1060	965	1488	129.923	127.954	139.998	126.396	99.8858	170.826	XP_015622101.1	uncharacterized protein LOC4324646 [Oryza sativa Japonica Group]
LOC_Os01g12110.MSUv7.0	12	13	8	24	14	21	0.674695	0.756937	0.436789	1.49109	0.755043	1.25614	BAS71069.1	Os01g0220500 [Oryza sativa Japonica Group]
LOC_Os01g12120.MSUv7.0	208	139	168	137	144	206	50.8967	35.2234	39.92	37.0437	33.7992	53.6274	LOC_Os01g12120.MSUv7.0	-
LOC_Os01g12130.MSUv7.0	107	197	207	20	14	49	7.02375	13.3919	13.195	1.45072	0.881518	3.42196	XP_025879729.1	bidirectional sugar transporter SWEET3b isoform X1 [Oryza sativa Japonica Group]
LOC_Os01g12140.MSUv7.0	1	2	3	1	0	1	0.142405	0.294948	0.41486	0.157359	0	0.151502	BAA96220.1	hypothetical protein [Oryza sativa Japonica Group]
LOC_Os01g12160.MSUv7.0	2202	2099	1881	2387	3922	2041	33.7455	33.3121	27.9926	40.4221	57.6533	33.2763	Q5NAZ7.2	RecName: Full=Jasmonoyl--L-amino acid synthetase GH3.3; AltName: Full=Auxin-responsive GH3-like protein 3; Short=OsGH3-3; AltName: Full=Indole-3-acetic acid-amido synthetase GH3.3; AltName: Full=Jasmonate-amino acid synthetase JAR2; AltName: Full=Jasmonic acid-amido synthetase JAR2; AltName: Full=Protein JASMONATE RESISTANT 2; Short=OsJAR2|BAF04344.1 Os01g0221100 [Oryza sativa Japonica Group]|BAS…
LOC_Os01g12180.MSUv7.0	225	209	238	181	297	243	6.15592	5.92172	6.32329	5.47214	7.79444	7.07311	BAS71075.1	Os01g0221300, partial [Oryza sativa Japonica Group]
LOC_Os01g12190.MSUv7.0	4	16	9	0	1	0	0.284034	1.17658	0.620594	0	0.0681126	0	XP_015633524.1	uncharacterized protein LOC9272458 [Oryza sativa Japonica Group]|BAA94540.1 hypothetical protein [Oryza sativa Japonica Group]|BAA96224.1 hypothetical protein [Oryza sativa Japonica Group]|EAY73062.1 hypothetical protein OsI_00937 [Oryza sativa Indica Group]|EAZ11071.1 hypothetical protein OsJ_00916 [Oryza sativa Japonica Group]|BAH90966.1 Os01g0221400 [Oryza sativa Japonica Group]|BAS71076.1 Os0…
LOC_Os01g12200.MSUv7.0	322	366	361	322	213	280	13.7789	16.2192	15.001	15.2259	8.74291	12.7471	XP_015618059.1	uncharacterized protein LOC4324652 [Oryza sativa Japonica Group]
LOC_Os01g12210.MSUv7.0	7	18	17	10	8	18	0.189528	0.504706	0.446971	0.299187	0.20777	0.518491	XP_015618041.1	aluminum-activated malate transporter 9 [Oryza sativa Japonica Group]|BAA94538.2 hypothetical protein [Oryza sativa Japonica Group]|BAA96226.1 hypothetical protein [Oryza sativa Japonica Group]|BAF04347.1 Os01g0221600 [Oryza sativa Japonica Group]|EAZ11073.1 hypothetical protein OsJ_00918 [Oryza sativa Japonica Group]|BAS71078.1 Os01g0221600 [Oryza sativa Japonica Group]
LOC_Os01g12220.MSUv7.0	5	0	0	0	4	1	0.325344	0	0	0	0.249661	0.0692256	BAD81370.1	hypothetical protein [Oryza sativa Japonica Group]|BAD81293.1 hypothetical protein [Oryza sativa Japonica Group]
LOC_Os01g12230.MSUv7.0	126	71	81	114	115	83	7.10729	4.14747	4.43684	7.10569	6.22228	4.98087	XP_015618051.1	uncharacterized protein LOC4326697 [Oryza sativa Japonica Group]|EEC70198.1 hypothetical protein OsI_00942 [Oryza sativa Indica Group]|EEE54134.1 hypothetical protein OsJ_00920 [Oryza sativa Japonica Group]
LOC_Os01g12240.MSUv7.0	221	168	222	175	108	85	29.9962	23.6143	29.2606	26.247	14.061	12.274	BAD81295.1	hypothetical protein [Oryza sativa Japonica Group]
LOC_Os01g12250.MSUv7.0	7	12	8	13	10	6	0.246681	0.437935	0.273768	0.506231	0.33803	0.224948	EEC70199.1	hypothetical protein OsI_00944 [Oryza sativa Indica Group]
LOC_Os01g12260.MSUv7.0	196	188	179	149	161	140	7.6521	7.60104	6.7863	6.42804	6.02932	5.81495	XP_015650694.1	V-type proton ATPase subunit E [Oryza sativa Japonica Group]|BAD81297.1 putative vacuolar V-H+ATPase subunit E [Oryza sativa Japonica Group]|BAF04351.1 Os01g0222500 [Oryza sativa Japonica Group]|BAG93143.1 unnamed protein product [Oryza sativa Japonica Group]|EEC70200.1 hypothetical protein OsI_00945 [Oryza sativa Indica Group]|BAS71083.1 Os01g0222500 [Oryza sativa Japonica Group]
LOC_Os01g12270.MSUv7.0	2074	1714	1763	1582	1936	1537	409.459	350.432	337.994	345.125	366.627	322.827	XP_015650706.1	uncharacterized protein LOC4326700 [Oryza sativa Japonica Group]|BAA94531.1 unknown protein [Oryza sativa Japonica Group]|BAF04352.1 Os01g0222600 [Oryza sativa Japonica Group]|EAY73071.1 hypothetical protein OsI_00946 [Oryza sativa Indica Group]|EAZ11079.1 hypothetical protein OsJ_00924 [Oryza sativa Japonica Group]|BAH00404.1 unnamed protein product [Oryza sativa Japonica Group]|BAS71084.1 Os01g…
LOC_Os01g12280.MSUv7.0	605	479	467	342	575	493	14.558	11.9364	10.9124	9.09371	13.2719	12.6208	XP_015650667.1	uncharacterized protein LOC4326701 [Oryza sativa Japonica Group]|XP_015650674.1 uncharacterized protein LOC4326701 [Oryza sativa Japonica Group]|BAF04353.1 Os01g0222700 [Oryza sativa Japonica Group]|BAG91139.1 unnamed protein product [Oryza sativa Japonica Group]|BAS71085.1 Os01g0222700 [Oryza sativa Japonica Group]
LOC_Os01g12290.MSUv7.0	134	184	200	97	147	121	3.00004	4.2661	4.34819	2.39973	3.15688	2.88205	XP_015650566.1	G-type lectin S-receptor-like serine/threonine-protein kinase At2g19130 isoform X1 [Oryza sativa Japonica Group]|BAD81299.1 putative S-domain receptor-like protein kinase [Oryza sativa Japonica Group]|BAF04354.1 Os01g0222800 [Oryza sativa Japonica Group]|EAZ11081.1 hypothetical protein OsJ_00926 [Oryza sativa Japonica Group]
LOC_Os01g12304.MSUv7.0	339	357	409	251	266	214	14.7608	16.0979	17.2938	12.0768	11.1099	9.91331	BAF04355.1	Os01g0223000, partial [Oryza sativa Japonica Group]|BAS71088.1 Os01g0223000, partial [Oryza sativa Japonica Group]
LOC_Os01g12320.MSUv7.0	338	363	541	304	301	244	11.2351	12.4956	17.4627	11.1661	9.59719	8.62865	XP_015620950.1	GDSL esterase/lipase At5g45910 [Oryza sativa Japonica Group]|BAD81450.1 putative esterase [Oryza sativa Japonica Group]|BAD81305.1 putative esterase [Oryza sativa Japonica Group]|BAF04356.1 Os01g0223200 [Oryza sativa Japonica Group]|BAG90381.1 unnamed protein product [Oryza sativa Japonica Group]|EEE54141.1 hypothetical protein OsJ_00931 [Oryza sativa Japonica Group]|BAS71089.1 Os01g0223200 [Oryz…
LOC_Os01g12340.MSUv7.0	2	4	3	5	4	4	0.0166971	0.034583	0.0243214	0.0461265	0.0320325	0.0355276	BAF04484.1	Os01g0244200 [Oryza sativa Japonica Group]
LOC_Os01g12381.MSUv7.0	393	456	510	368	444	319	22.386	26.8992	28.2105	23.1633	24.2597	19.3316	BAS71092.1	Os01g0223500 [Oryza sativa Japonica Group]
LOC_Os01g12390.MSUv7.0	288	279	320	179	207	217	6.28322	6.30354	6.77946	4.3153	4.33189	5.03666	XP_015649504.1	probable inactive receptor kinase At4g23740 [Oryza sativa Japonica Group]
LOC_Os01g12400.MSUv7.0	1198	739	1075	710	1110	802	23.1946	14.8172	20.2113	15.19	20.6144	16.5196	BAF04361.1	Os01g0223700 [Oryza sativa Japonica Group]|BAG90411.1 unnamed protein product [Oryza sativa Japonica Group]
LOC_Os01g12410.MSUv7.0	289	321	230	95	207	169	6.58048	7.5693	5.08561	2.39029	4.52114	4.09393	BAS71095.1	Os01g0223800 [Oryza sativa Japonica Group]
LOC_Os01g12420.MSUv7.0	527	347	376	327	270	218	10.3377	7.04911	7.16238	7.0881	5.08038	4.54951	XP_015621846.1	G-type lectin S-receptor-like serine/threonine-protein kinase At2g19130 [Oryza sativa Japonica Group]|BAA94517.1 putative S-domain receptor-like protein kinase [Oryza sativa Japonica Group]|BAB07905.1 putative S-domain receptor-like protein kinase [Oryza sativa Japonica Group]|BAF04362.1 Os01g0223900 [Oryza sativa Japonica Group]|EAZ11091.1 hypothetical protein OsJ_00938 [Oryza sativa Japonica Gr…
LOC_Os01g12430.MSUv7.0	320	211	143	215	262	248	6.20017	4.23376	2.69057	4.6032	4.86937	5.11209	XP_015621848.1	G-type lectin S-receptor-like serine/threonine-protein kinase At2g19130 [Oryza sativa Japonica Group]|BAD81458.1 putative S-domain receptor-like protein kinase [Oryza sativa Japonica Group]|BAD81313.1 putative S-domain receptor-like protein kinase [Oryza sativa Japonica Group]|EEE54145.1 hypothetical protein OsJ_00939 [Oryza sativa Japonica Group]|BAF04363.2 Os01g0224000 [Oryza sativa Japonica Gr…
LOC_Os01g12440.MSUv7.0	61	78	98	50	52	78	1.73449	2.29683	2.70598	1.57102	1.41829	2.35956	XP_015629650.1	ethylene-responsive transcription factor CRF2 [Oryza sativa Japonica Group]|BAD81461.1 Pti6 -like [Oryza sativa Japonica Group]|BAD81316.1 Pti6 -like [Oryza sativa Japonica Group]|BAF04364.1 Os01g0224100 [Oryza sativa Japonica Group]|BAG94891.1 unnamed protein product [Oryza sativa Japonica Group]|BAG97749.1 unnamed protein product [Oryza sativa Japonica Group]|BAS71098.1 Os01g0224100 [Oryza sati…
LOC_Os01g12460.MSUv7.0	5	5	6	4	1	8	0.265648	0.275104	0.309559	0.234836	0.050963	0.452189	XP_015642777.1	plastid division protein PDV1 [Oryza sativa Japonica Group]|BAD81465.1 unknown protein [Oryza sativa Japonica Group]|EAZ11094.1 hypothetical protein OsJ_00941 [Oryza sativa Japonica Group]|BAS71100.1 Os01g0224200 [Oryza sativa Japonica Group]
LOC_Os01g12464.MSUv7.0	50	50	97	38	25	31	3.4471	3.56981	6.49398	2.89491	1.65326	2.27373	XP_015621681.1	uncharacterized protein LOC4326731 [Oryza sativa Japonica Group]|BAD81466.1 hypothetical protein [Oryza sativa Japonica Group]|BAD81539.1 hypothetical protein [Oryza sativa Japonica Group]|BAF04366.1 Os01g0224300 [Oryza sativa Japonica Group]|EEC70212.1 hypothetical protein OsI_00962 [Oryza sativa Indica Group]|EEE54146.1 hypothetical protein OsJ_00942 [Oryza sativa Japonica Group]|BAS71101.1 Os0…
LOC_Os01g12470.MSUv7.0	243	332	287	206	216	254	8.97604	12.7001	10.2948	8.40841	7.65333	9.98173	EEC70213.1	hypothetical protein OsI_00963 [Oryza sativa Indica Group]
LOC_Os01g12480.MSUv7.0	497	398	556	404	425	361	28.1562	23.3503	30.5878	25.2911	23.0954	21.758	XP_015621679.1	uncharacterized protein LOC4326733 [Oryza sativa Japonica Group]|XP_015621680.1 uncharacterized protein LOC4326733 [Oryza sativa Japonica Group]|BAD81467.1 unknown protein [Oryza sativa Japonica Group]|BAD81540.1 unknown protein [Oryza sativa Japonica Group]|BAF04368.1 Os01g0224500 [Oryza sativa Japonica Group]|EAZ11096.1 hypothetical protein OsJ_00944 [Oryza sativa Japonica Group]|BAG98640.1 unn…
LOC_Os01g12490.MSUv7.0	193	145	206	152	140	84	4.54961	3.53977	4.71563	3.95939	3.16565	2.10664	XP_015632133.1	indole-3-pyruvate monooxygenase YUCCA2 [Oryza sativa Japonica Group]|Q9LG41.2 RecName: Full=Indole-3-pyruvate monooxygenase YUCCA4; Short=OsYUCCA4; AltName: Full=Flavin-containing monooxygenase YUCCA4|BAB07916.2 putative flavin-containing monooxygenase YUCCA3 [Oryza sativa Japonica Group]|BAB32703.1 putative flavin-containing monooxygenase YUCCA3 [Oryza sativa Japonica Group]|BAF04369.1 Os01g0224…
LOC_Os01g12520.MSUv7.0	6	16	8	36	9	43	0.322725	0.891236	0.417857	2.1397	0.464347	2.46062	XP_015630169.1	mitochondrial arginine transporter BAC2 [Oryza sativa Japonica Group]|BAF04370.1 Os01g0225000 [Oryza sativa Japonica Group]|BAS71106.1 Os01g0225000 [Oryza sativa Japonica Group]
LOC_Os01g12530.MSUv7.0	1663	1602	1557	1554	1996	1724	20.0036	19.9558	18.187	20.6555	23.0301	22.0622	BAS71107.1	Os01g0225100 [Oryza sativa Japonica Group]
LOC_Os01g12540.MSUv7.0	484	500	535	422	578	372	7.5618	8.08985	8.11687	7.28551	8.66214	6.18324	EAY73092.1	hypothetical protein OsI_00968 [Oryza sativa Indica Group]
LOC_Os01g12550.MSUv7.0	461	400	372	448	440	371	11.8771	10.6724	9.30696	12.7543	10.8738	10.169	BAS71109.1	Os01g0225300 [Oryza sativa Japonica Group]
LOC_Os01g12560.MSUv7.0	413	293	356	311	510	330	15.6436	11.4933	13.0946	13.0171	18.53	13.2983	XP_015629790.1	3-methyl-2-oxobutanoate hydroxymethyltransferase 1, mitochondrial [Oryza sativa Japonica Group]|Q9AWZ8.1 RecName: Full=3-methyl-2-oxobutanoate hydroxymethyltransferase 1, mitochondrial; AltName: Full=Ketopantoate hydroxymethyltransferase 1; Flags: Precursor|BAB32712.1 putative 3-methyl-2-oxobutanoate hydroxymethyltransferase [Oryza sativa Japonica Group]|BAB92103.1 putative 3-methyl-2-oxobutanoat…
LOC_Os01g12570.MSUv7.0	8	62	126	2	0	3	0.256592	2.05937	3.92444	0.0708843	0	0.102369	XP_015645815.1	3-methyl-2-oxobutanoate hydroxymethyltransferase 2, mitochondrial [Oryza sativa Japonica Group]|Q9AWZ7.1 RecName: Full=3-methyl-2-oxobutanoate hydroxymethyltransferase 2, mitochondrial; AltName: Full=Ketopantoate hydroxymethyltransferase 2; Flags: Precursor|BAB32713.1 putative 3-methyl-2-oxobutanoate hydroxymethyltransferase [Oryza sativa Japonica Group]|BAB92104.1 putative 3-methyl-2-oxobutanoat…
LOC_Os01g12580.MSUv7.0	7	19	14	4	3	3	0.29071	0.817158	0.564606	0.183565	0.119509	0.132549	BAS71112.1	Os01g0225550, partial [Oryza sativa Japonica Group]
LOC_Os01g12610.MSUv7.0	3	1	9	8	8	14	0.400924	0.138399	1.16799	1.18141	1.02553	1.9905	AAL31681.1	hypothetical protein [Oryza sativa Japonica Group]|ABF97728.1 hypothetical protein LOC_Os03g42930 [Oryza sativa Japonica Group]
LOC_Os01g12640.MSUv7.0	11	10	4	19	11	14	0.347468	0.327124	0.122698	0.663198	0.333298	0.470482	BAS71116.1	Os01g0226200 [Oryza sativa Japonica Group]
LOC_Os01g12650.MSUv7.0	322	293	399	318	162	332	12.8998	12.1559	15.5223	14.0774	6.22531	14.1501	XP_015616216.1	reticulon-like protein B1 [Oryza sativa Japonica Group]|BAB32723.1 unknown protein [Oryza sativa Japonica Group]|BAB92114.1 unknown protein [Oryza sativa Japonica Group]|EAZ11106.1 hypothetical protein OsJ_00954 [Oryza sativa Japonica Group]
LOC_Os01g12660.MSUv7.0	3	1	6	1	8	3	0.0526998	0.0181919	0.102352	0.0194114	0.134802	0.0560664	XP_015627525.1	uncharacterized protein LOC4326743 [Oryza sativa Japonica Group]|BAD81507.1 unknown protein [Oryza sativa Japonica Group]|BAD81550.1 unknown protein [Oryza sativa Japonica Group]|BAF04378.1 Os01g0226400 [Oryza sativa Japonica Group]|BAG95489.1 unnamed protein product [Oryza sativa Japonica Group]|BAS71118.1 Os01g0226400 [Oryza sativa Japonica Group]
LOC_Os01g12670.MSUv7.0	338	267	331	263	384	302	7.2826	5.95761	6.92553	6.26172	7.93632	6.92262	EAZ11108.1	hypothetical protein OsJ_00956 [Oryza sativa Japonica Group]
LOC_Os01g12680.MSUv7.0	6	5	3	10	0	4	0.0968776	0.0836051	0.047038	0.178419	0	0.0687109	XP_015630243.1	S-type anion channel SLAH3 isoform X1 [Oryza sativa Japonica Group]
LOC_Os01g12690.MSUv7.0	3	4	7	19	11	12	0.106151	0.146573	0.240523	0.74289	0.373348	0.451729	XP_015643684.1	uncharacterized protein LOC4326746 [Oryza sativa Japonica Group]
LOC_Os01g12710.MSUv7.0	2202	1857	1804	2149	2735	3059	50.4256	44.0389	40.1167	54.3798	60.0771	74.5258	XP_015621887.1	probable chlorophyll(ide) b reductase NYC1, chloroplastic [Oryza sativa Japonica Group]|Q5N800.1 RecName: Full=Probable chlorophyll(ide) b reductase NYC1, chloroplastic; AltName: Full=Protein NON-YELLOW COLORING 1; Short=OsNYC1; Flags: Precursor|BAD81513.1 unknown protein [Oryza sativa Japonica Group]|BAD82407.1 unknown protein [Oryza sativa Japonica Group]|BAF04382.1 Os01g0227100 [Oryza sativa J…
LOC_Os01g12720.MSUv7.0	3419	2586	3184	2714	3782	3054	77.2761	60.5293	69.8835	67.7835	81.9947	73.436	XP_015649299.1	proline-rich receptor-like protein kinase PERK1 [Oryza sativa Japonica Group]|BAB78668.1 putative brassinosteroid insensitive 1-associated receptor kinase 1 [Oryza sativa Japonica Group]|BAF04383.1 Os01g0227200 [Oryza sativa Japonica Group]|BAG95975.1 unnamed protein product [Oryza sativa Japonica Group]|BAS71130.1 Os01g0227200 [Oryza sativa Japonica Group]
LOC_Os01g12730.MSUv7.0	698	796	807	515	470	663	25.8563	30.5362	29.0296	21.0808	16.7004	26.1288	XP_015649338.1	ras-related protein Rab7 [Oryza sativa Japonica Group]|BAD82408.1 putative RAB7D [Oryza sativa Japonica Group]|BAF04384.1 Os01g0227300 [Oryza sativa Japonica Group]|BAG91885.1 unnamed protein product [Oryza sativa Japonica Group]|BAG87239.1 unnamed protein product [Oryza sativa Japonica Group]|EEC70222.1 hypothetical protein OsI_00983 [Oryza sativa Indica Group]|EEE54155.1 hypothetical protein Os…
LOC_Os01g12740.MSUv7.0	84	89	140	47	46	74	2.18359	2.39592	3.53407	1.35007	1.14701	2.04652	XP_015649313.1	cytochrome P450 71A1 [Oryza sativa Japonica Group]|BAB78670.1 putative Cytochrome P450 71A1 [Oryza sativa Japonica Group]|EAZ11115.1 hypothetical protein OsJ_00962 [Oryza sativa Japonica Group]
LOC_Os01g12750.MSUv7.0	52	46	71	46	14	30	1.43399	1.31369	1.90133	1.40175	0.370331	0.880154	XP_015649308.1	cytochrome P450 71A1 [Oryza sativa Japonica Group]
LOC_Os01g12760.MSUv7.0	0	0	0	1	0	0	0	0	0	0.0331951	0	0	XP_015649331.1	cytochrome P450 71A1 [Oryza sativa Japonica Group]|BAH01154.1 unnamed protein product [Oryza sativa Japonica Group]|BAS71137.1 Os01g0227700 [Oryza sativa Japonica Group]
LOC_Os01g12770.MSUv7.0	100	58	69	264	382	263	2.81731	1.6922	1.88772	8.21875	10.3232	7.88285	BAB78674.1	putative Cytochrome P450 71A1 [Oryza sativa Japonica Group]
LOC_Os01g12780.MSUv7.0	0	0	0	4	0	0	0	0	0	0.454387	0	0	BAD82412.1	hypothetical protein [Oryza sativa Japonica Group]
LOC_Os01g12790.MSUv7.0	8	20	14	3	14	30	0.111012	0.287409	0.188653	0.0460012	0.186349	0.442889	XP_025879851.1	receptor kinase-like protein Xa21 [Oryza sativa Japonica Group]
LOC_Os01g12800.MSUv7.0	412	372	451	395	386	335	20.5685	19.2326	21.8644	21.7907	18.4846	17.7928	XP_015622024.1	protein Mpv17 [Oryza sativa Japonica Group]|BAB78679.1 MpV17 transgene -like [Oryza sativa Japonica Group]|BAF04390.1 Os01g0228300 [Oryza sativa Japonica Group]|EEE54158.1 hypothetical protein OsJ_00968 [Oryza sativa Japonica Group]|BAS71140.1 Os01g0228300 [Oryza sativa Japonica Group]
LOC_Os01g12810.MSUv7.0	14	23	46	20	14	11	0.255491	0.434676	0.815193	0.403316	0.245072	0.213567	BAS71141.1	Os01g0228450, partial [Oryza sativa Japonica Group]
LOC_Os01g12820.MSUv7.0	1	1	0	0	9	3	0.027231	0.0282003	0	0	0.235085	0.0869118	XP_015616690.1	uncharacterized protein LOC4327188 [Oryza sativa Japonica Group]|XP_015616696.1 uncharacterized protein LOC4327188 [Oryza sativa Japonica Group]|XP_015616702.1 uncharacterized protein LOC4327188 [Oryza sativa Japonica Group]|XP_015616710.1 uncharacterized protein LOC4327188 [Oryza sativa Japonica Group]|XP_025879864.1 uncharacterized protein LOC4327188 [Oryza sativa Japonica Group]|XP_025879870.1…
LOC_Os01g12830.MSUv7.0	988	873	994	793	749	783	23.654	21.6447	23.1094	20.9792	17.2007	19.9436	EEC70231.1	hypothetical protein OsI_01001 [Oryza sativa Indica Group]
LOC_Os01g12840.MSUv7.0	194	196	187	101	130	142	3.24288	3.39294	3.03547	1.8656	2.08445	2.52529	XP_015634227.1	uncharacterized protein LOC4327191 isoform X1 [Oryza sativa Japonica Group]
LOC_Os01g12860.MSUv7.0	82	65	78	72	108	82	1.12886	0.926679	1.04274	1.09528	1.42615	1.20097	BAD81319.1	putative Myb-like protein [Oryza sativa Japonica Group]|BAD82418.1 putative Myb-like protein [Oryza sativa Japonica Group]
LOC_Os01g12870.MSUv7.0	950	880	1055	1085	1232	1024	25.4702	24.4333	27.4674	32.1445	31.6839	29.2081	EEC70234.1	hypothetical protein OsI_01004 [Oryza sativa Indica Group]
LOC_Os01g12880.MSUv7.0	4645	4061	4239	3773	5032	4153	90.0998	81.5759	79.8467	80.871	93.626	85.7025	XP_015613473.1	TOM1-like protein 9 [Oryza sativa Japonica Group]|BAD81322.1 target of myb1 -like [Oryza sativa Japonica Group]|BAD82421.1 target of myb1 -like [Oryza sativa Japonica Group]|BAF04398.1 Os01g0229200 [Oryza sativa Japonica Group]|EAZ11130.1 hypothetical protein OsJ_00977 [Oryza sativa Japonica Group]|BAG89779.1 unnamed protein product [Oryza sativa Japonica Group]|BAS71153.1 Os01g0229200 [Oryza sat…
LOC_Os01g12890.MSUv7.0	139	141	171	122	172	124	1.68481	1.76989	2.01274	1.63405	1.99979	1.59901	EEE54165.1	hypothetical protein OsJ_00978 [Oryza sativa Japonica Group]
LOC_Os01g12900.MSUv7.0	45	85	107	52	56	56	1.41802	2.77383	3.27423	1.81068	1.69268	1.87738	BAG92329.1	unnamed protein product [Oryza sativa Japonica Group]|BAS71159.1 Os01g0229400 [Oryza sativa Japonica Group]
LOC_Os01g12910.MSUv7.0	434	483	664	456	355	356	28.453	32.7926	42.2729	33.0348	22.3247	24.8303	EEE54167.1	hypothetical protein OsJ_00980 [Oryza sativa Japonica Group]
LOC_Os01g12920.MSUv7.0	333	365	739	337	348	381	23.9393	27.1739	51.5902	26.7711	23.9974	29.1398	BAS71161.1	Os01g0229600 [Oryza sativa Japonica Group]
LOC_Os01g12930.MSUv7.0	182	168	216	155	209	162	2.26989	2.16987	2.61603	2.13616	2.50033	2.14952	BAD81324.1	hypothetical protein [Oryza sativa Japonica Group]|BAF04403.1 Os01g0229700 [Oryza sativa Japonica Group]
LOC_Os01g12940.MSUv7.0	4	2	108	3	10	20	0.228597	0.118367	5.99363	0.189452	0.548187	1.216	BAA94780.1	putative bark storage protein [Oryza sativa Japonica Group]
LOC_Os01g12950.MSUv7.0	433	424	440	314	487	345	6.84087	6.93713	6.75043	5.48177	7.38024	5.79877	ABA95229.1	retrotransposon protein, putative, Ty3-gypsy subclass [Oryza sativa Japonica Group]
LOC_Os01g12990.MSUv7.0	6	6	0	5	1	3	0.498757	0.516512	0	0.459278	0.0797363	0.26531	BAD81279.1	hypothetical protein [Oryza sativa Japonica Group]|BAD81327.1 hypothetical protein [Oryza sativa Japonica Group]
LOC_Os01g13000.MSUv7.0	508	346	442	398	342	295	14.2273	10.0352	12.0209	12.3172	9.18763	8.78972	XP_025879902.1	transcription factor bHLH68 isoform X6 [Oryza sativa Japonica Group]
LOC_Os01g13010.MSUv7.0	0	0	0	0	0	3	0	0	0	0	0	0.759585	BAD81281.1	hypothetical protein [Oryza sativa Japonica Group]|BAD81329.1 hypothetical protein [Oryza sativa Japonica Group]
LOC_Os01g13020.MSUv7.0	6	1	0	0	0	0	0.430745	0.0743464	0	0	0	0	BAS71168.1	Os01g0230700 [Oryza sativa Japonica Group]
LOC_Os01g13024.MSUv7.0	4	7	3	7	8	14	0.203594	0.368973	0.14828	0.393706	0.390583	0.758101	XP_015621956.1	uncharacterized protein LOC9269785 [Oryza sativa Japonica Group]|BAD81282.1 unknown protein [Oryza sativa Japonica Group]|BAD81330.1 unknown protein [Oryza sativa Japonica Group]|BAG98647.1 unnamed protein product [Oryza sativa Japonica Group]|BAH90973.1 Os01g0230800 [Oryza sativa Japonica Group]|BAS71169.1 Os01g0230800 [Oryza sativa Japonica Group]
LOC_Os01g13030.MSUv7.0	1185	1213	1636	1038	992	871	37.2511	39.4887	49.9413	36.0567	29.9124	29.1295	EEC70239.1	hypothetical protein OsI_01017 [Oryza sativa Indica Group]
LOC_Os01g13040.MSUv7.0	1	0	2	1	0	2	0.0588264	0	0.11425	0.065004	0	0.125169	XP_015621957.1	uncharacterized protein LOC107278458 [Oryza sativa Japonica Group]|BAD81284.1 hypothetical protein [Oryza sativa Japonica Group]|BAS71171.1 Os01g0231100 [Oryza sativa Japonica Group]
LOC_Os01g13050.MSUv7.0	0	0	2	0	1	0	0	0	0.212213	0	0.104811	0	EEC67652.1	hypothetical protein OsI_35062 [Oryza sativa Indica Group]
LOC_Os01g13060.MSUv7.0	1460	1394	1461	882	1018	973	22.4603	22.2083	21.8257	14.9934	15.022	15.9246	XP_006643946.1	PREDICTED: casein kinase I-like isoform X1 [Oryza brachyantha]
LOC_Os01g13070.MSUv7.0	65	93	88	58	65	57	2.54914	3.77706	3.35134	2.51349	2.44519	2.3782	XP_015618308.1	VAN3-binding protein isoform X1 [Oryza sativa Japonica Group]|XP_025879934.1 VAN3-binding protein isoform X1 [Oryza sativa Japonica Group]|XP_025879937.1 VAN3-binding protein isoform X1 [Oryza sativa Japonica Group]|XP_025879938.1 VAN3-binding protein isoform X1 [Oryza sativa Japonica Group]
LOC_Os01g13080.MSUv7.0	974	1006	1316	1049	893	965	68.6942	73.4767	90.1306	81.7532	60.413	72.4073	XP_015618339.1	60S acidic ribosomal protein P3-like [Oryza sativa Japonica Group]|BAD81287.1 putative acidic ribosomal protein P3a [Oryza sativa Japonica Group]|BAF04411.1 Os01g0231700 [Oryza sativa Japonica Group]|EAY73149.1 hypothetical protein OsI_01022 [Oryza sativa Indica Group]|BAG98052.1 unnamed protein product [Oryza sativa Japonica Group]|EEE54175.1 hypothetical protein OsJ_00993 [Oryza sativa Japonica…
LOC_Os01g13090.MSUv7.0	2040	2133	2579	960	1071	1117	75.8382	82.1182	93.1031	39.4364	38.1914	44.1778	XP_015619255.1	activating signal cointegrator 1 complex subunit 1 [Oryza sativa Japonica Group]|XP_025879947.1 activating signal cointegrator 1 complex subunit 1 [Oryza sativa Japonica Group]|BAD81288.1 unknown protein [Oryza sativa Japonica Group]|BAF04412.1 Os01g0231800 [Oryza sativa Japonica Group]|BAG88489.1 unnamed protein product [Oryza sativa Japonica Group]
LOC_Os01g13100.MSUv7.0	1465	1429	1562	1144	1644	1297	37.5583	37.9395	38.887	32.4087	40.4285	35.3754	XP_015621431.1	activating signal cointegrator 1 complex subunit 1 isoform X1 [Oryza sativa Japonica Group]
LOC_Os01g13120.MSUv7.0	41	46	26	29	7	9	1.7559	2.04016	1.08129	1.3724	0.287562	0.410064	XP_015621438.1	probable aquaporin TIP4-3 [Oryza sativa Japonica Group]|Q9LWR2.1 RecName: Full=Probable aquaporin TIP4-3; AltName: Full=Tonoplast intrinsic protein 4-3; Short=OsTIP4;3|BAA92991.1 putative tonoplast membrane integral protein [Oryza sativa Japonica Group]|BAF04414.1 Os01g0232000 [Oryza sativa Japonica Group]|BAS71180.1 Os01g0232000 [Oryza sativa Japonica Group]
LOC_Os01g13130.MSUv7.0	21	11	30	14	17	16	0.862508	0.467872	1.19652	0.635389	0.669747	0.699129	XP_025879958.1	probable aquaporin TIP4-2 [Oryza sativa Japonica Group]|Q9LWR0.2 RecName: Full=Probable aquaporin TIP4-2; AltName: Full=Tonoplast intrinsic protein 4-2; Short=OsTIP4;2|BAF04415.1 Os01g0232100 [Oryza sativa Japonica Group]|BAG91507.1 unnamed protein product [Oryza sativa Japonica Group]|BAG93985.1 unnamed protein product [Oryza sativa Japonica Group]|BAS71182.1 Os01g0232100 [Oryza sativa Japonica …
LOC_Os01g13150.MSUv7.0	893	812	931	820	1492	966	13.4169	12.6342	13.5833	13.6139	21.5025	15.4409	BAF04416.1	Os01g0232300 [Oryza sativa Japonica Group]
LOC_Os01g13160.MSUv7.0	2004	1992	1924	1715	1854	1665	36.6358	37.7128	34.1561	34.645	32.5114	32.3829	EAZ11151.1	hypothetical protein OsJ_00999 [Oryza sativa Japonica Group]
LOC_Os01g13170.MSUv7.0	2146	2139	2371	2269	2821	2604	59.9731	61.9054	64.3448	70.0695	75.6219	77.4215	XP_015621948.1	putative ubiquitin-conjugating enzyme E2 38 isoform X3 [Oryza sativa Japonica Group]|BAD81371.1 ubiquitin-conjugating enzyme -like [Oryza sativa Japonica Group]|BAF04418.1 Os01g0232500 [Oryza sativa Japonica Group]|BAS71187.1 Os01g0232500 [Oryza sativa Japonica Group]
LOC_Os01g13180.MSUv7.0	0	0	0	0	3	0	0	0	0	0	0.10798	0	BAA96584.1	hypothetical protein [Oryza sativa Japonica Group]|BAF04419.1 Os01g0232600 [Oryza sativa Japonica Group]
LOC_Os01g13190.MSUv7.0	1329	1380	1609	1265	1614	1119	37.6455	40.4816	44.2588	39.5955	43.854	33.7219	OQU90881.1	hypothetical protein SORBI_3001G067300 [Sorghum bicolor]
LOC_Os01g13200.MSUv7.0	2638	2117	2811	2533	2646	2170	68.2347	56.7077	70.6068	72.3992	65.6506	59.7151	BAA96586.1	putative SDL-1 protein [Oryza sativa Japonica Group]
LOC_Os01g13210.MSUv7.0	2841	3510	3272	4081	4474	6664	104.498	133.701	116.87	165.871	157.852	260.774	XP_015621495.1	salt stress root protein RS1 [Oryza sativa Japonica Group]|Q0JPA6.1 RecName: Full=Salt stress root protein RS1|A2WMG6.1 RecName: Full=Salt stress root protein RS1|BAA96588.1 plasma membrane polypeptide -like [Oryza sativa Japonica Group]|BAF04422.1 Os01g0233000 [Oryza sativa Japonica Group]|EAY73162.1 hypothetical protein OsI_01035 [Oryza sativa Indica Group]|EAZ11155.1 hypothetical protein OsJ_0…
LOC_Os01g13229.MSUv7.0	5	8	21	14	6	19	0.127371	0.211048	0.519487	0.394091	0.146612	0.514929	EEC80895.1	hypothetical protein OsI_23541 [Oryza sativa Indica Group]
LOC_Os01g13250.MSUv7.0	0	0	1	3	1	0	0	0	0.092191	0.314719	0.0910649	0	EMS48385.1	hypothetical protein TRIUR3_13409 [Triticum urartu]
LOC_Os01g13260.MSUv7.0	22	7	18	18	13	12	0.544983	0.179576	0.433	0.49272	0.308902	0.316253	XP_015630726.1	cyclin-A1-1 [Oryza sativa Japonica Group]|Q7F830.1 RecName: Full=Cyclin-A1-1; AltName: Full=G2/mitotic-specific cyclin-A1-1; Short=CycA1;1|BAA86628.1 cyclin [Oryza sativa]|BAA96590.1 putative type A-like cyclin [Oryza sativa Japonica Group]|BAF04426.1 Os01g0233500 [Oryza sativa Japonica Group]|BAS71197.1 Os01g0233500 [Oryza sativa Japonica Group]
LOC_Os01g13270.MSUv7.0	3	11	10	2	22	6	0.0756827	0.287381	0.24498	0.0557536	0.532373	0.161035	XP_015649902.1	serine/threonine-protein kinase AGC1-7 [Oryza sativa Japonica Group]|BAF04427.1 Os01g0233800 [Oryza sativa Japonica Group]|BAG91710.1 unnamed protein product [Oryza sativa Japonica Group]|BAS71199.1 Os01g0233800 [Oryza sativa Japonica Group]
LOC_Os01g13280.MSUv7.0	160	169	301	178	152	190	4.84557	5.30032	8.85211	5.9568	4.41557	6.1217	XP_015650019.1	putative ubiquitin-conjugating enzyme E2 39 isoform X1 [Oryza sativa Japonica Group]|XP_015650172.1 putative ubiquitin-conjugating enzyme E2 39 isoform X1 [Oryza sativa Japonica Group]|XP_025879973.1 putative ubiquitin-conjugating enzyme E2 39 isoform X1 [Oryza sativa Japonica Group]|BAD81377.1 ubiquitin-conjugating enzyme -like [Oryza sativa Japonica Group]|BAF04428.1 Os01g0233900 [Oryza sativa …
LOC_Os01g13285.MSUv7.0	10	3	6	6	9	15	1.27122	0.394942	0.740676	0.842832	1.09744	2.02865	EEE51223.1	hypothetical protein OsJ_32061 [Oryza sativa Japonica Group]|BAS71202.1 Os01g0234001 [Oryza sativa Japonica Group]|BAT11530.1 Os10g0501401 [Oryza sativa Japonica Group]
LOC_Os01g13300.MSUv7.0	31	27	41	49	59	47	0.727149	0.655867	0.933901	1.27006	1.32749	1.17288	XP_025879982.1	B3 domain-containing protein Os01g0234100 isoform X1 [Oryza sativa Japonica Group]
LOC_Os01g13310.MSUv7.0	6	6	7	27	9	6	0.247015	0.255808	0.27985	1.2283	0.355412	0.262795	BAA96596.1	putative topoisomerase II [Oryza sativa Japonica Group]|EAZ11163.1 hypothetical protein OsJ_01012 [Oryza sativa Japonica Group]|BAS71204.1 Os01g0234200 [Oryza sativa Japonica Group]
LOC_Os01g13320.MSUv7.0	120	84	186	76	51	57	3.10085	2.24786	4.66733	2.17011	1.26412	1.567	BAS71205.1	Os01g0234300 [Oryza sativa Japonica Group]
LOC_Os01g13350.MSUv7.0	550	485	617	391	534	399	10.8378	9.8972	11.8065	8.51382	10.0934	8.36463	XP_015621583.1	uncharacterized protein LOC4324293 [Oryza sativa Japonica Group]
LOC_Os01g13340.MSUv7.0	0	0	2	1	0	0	0	0	0.101632	0.0578248	0	0	BAD81383.1	unknown protein [Oryza sativa Japonica Group]|BAG98565.1 unnamed protein product [Oryza sativa Japonica Group]|BAF04430.2 Os01g0234700 [Oryza sativa Japonica Group]|BAS71208.1 Os01g0234700 [Oryza sativa Japonica Group]
LOC_Os01g13370.MSUv7.0	1156	1136	1032	1650	1674	1254	33.7919	34.3893	29.2947	53.2974	46.9383	38.9983	PAN05752.1	hypothetical protein PAHAL_1G135600 [Panicum hallii]|PUZ75195.1 hypothetical protein GQ55_1G131100 [Panicum hallii var. hallii]
LOC_Os01g13390.MSUv7.0	0	0	0	0	1	0	0	0	0	0	0.0462058	0	XP_015631916.1	uncharacterized protein LOC4327776 [Oryza sativa Japonica Group]|BAS71213.1 Os01g0235100 [Oryza sativa Japonica Group]
LOC_Os01g13404.MSUv7.0	150	97	113	94	113	137	3.26023	2.18333	2.38501	2.25763	2.35588	3.16789	BAS71215.1	Os01g0235200 [Oryza sativa Japonica Group]
LOC_Os01g13420.MSUv7.0	1006	997	1315	1301	1559	1243	50.3195	51.6445	63.8733	71.909	74.8001	66.1459	XP_015621551.1	heme-binding protein 2 [Oryza sativa Japonica Group]|BAA92902.1 unknown protein [Oryza sativa Japonica Group]|BAA96608.1 unknown protein [Oryza sativa Japonica Group]|BAF04435.1 Os01g0235300 [Oryza sativa Japonica Group]|EAY73185.1 hypothetical protein OsI_01058 [Oryza sativa Indica Group]|EAZ11174.1 hypothetical protein OsJ_01024 [Oryza sativa Japonica Group]|BAG95804.1 unnamed protein product […
LOC_Os01g13430.MSUv7.0	575	484	732	554	671	530	8.17042	7.12217	10.1005	8.69869	9.1457	8.01209	XP_015620985.1	exportin-2 [Oryza sativa Japonica Group]|BAA92904.1 putative importin-alpha re-exporter [Oryza sativa Japonica Group]
LOC_Os01g13450.MSUv7.0	0	0	0	0	0	2	0	0	0	0	0	0.154671	BAD81264.1	hypothetical protein [Oryza sativa Japonica Group]
LOC_Os01g13460.MSUv7.0	1691	1475	1629	1768	2313	1753	33.4733	30.2369	31.3135	38.6727	43.9186	36.9173	XP_015621308.1	transcription factor bHLH13 [Oryza sativa Japonica Group]|BAF04438.1 Os01g0235700 [Oryza sativa Japonica Group]|BAG89289.1 unnamed protein product [Oryza sativa Japonica Group]|BAH00275.1 unnamed protein product [Oryza sativa Japonica Group]|BAS71223.1 Os01g0235700 [Oryza sativa Japonica Group]
LOC_Os01g13470.MSUv7.0	660	659	658	587	572	592	12.6841	13.1157	12.28	12.4659	10.5446	12.1041	XP_015621489.1	KH domain-containing protein HEN4 isoform X3 [Oryza sativa Japonica Group]
LOC_Os01g13480.MSUv7.0	7	14	13	40	18	72	0.238147	0.493248	0.429483	1.50375	0.587405	2.60599	XP_015626195.1	uncharacterized protein LOC4327783 [Oryza sativa Japonica Group]|BAA92911.1 peptide transporter protein -like [Oryza sativa Japonica Group]|BAF04440.1 Os01g0235900 [Oryza sativa Japonica Group]|BAS71226.1 Os01g0235900 [Oryza sativa Japonica Group]
LOC_Os01g13490.MSUv7.0	42	49	31	36	27	28	1.8002	2.175	1.2903	1.70507	1.11008	1.2768	XP_015627598.1	uncharacterized protein LOC4327784 [Oryza sativa Japonica Group]|BAD81268.1 unknown protein [Oryza sativa Japonica Group]|BAF04441.1 Os01g0236000 [Oryza sativa Japonica Group]|EEC70259.1 hypothetical protein OsI_01063 [Oryza sativa Indica Group]|BAS71228.1 Os01g0236000 [Oryza sativa Japonica Group]
LOC_Os01g13520.MSUv7.0	2476	1813	2348	1770	1468	1202	45.138	34.2279	41.5666	35.656	25.6706	23.3125	XP_015622434.1	auxin response factor 1 [Oryza sativa Japonica Group]|Q5NB85.1 RecName: Full=Auxin response factor 1; AltName: Full=OsARF16|BAD81271.1 putative auxin response factor 20 [Oryza sativa Japonica Group]|BAF04442.1 Os01g0236300 [Oryza sativa Japonica Group]|ACJ54911.1 auxin response factor [Oryza sativa Japonica Group]|BAG95597.1 unnamed protein product [Oryza sativa Japonica Group]|BAS71229.1 Os01g02…
LOC_Os01g13530.MSUv7.0	61	65	76	43	57	60	1.8293	2.01865	2.21322	1.42493	1.63964	1.91426	XP_015633536.1	probable protein ABIL3 [Oryza sativa Japonica Group]|Q5NB83.1 RecName: Full=Probable protein ABIL3; AltName: Full=Abl interactor-like protein 3|BAD81273.1 unknown protein [Oryza sativa Japonica Group]|BAG89094.1 unnamed protein product [Oryza sativa Japonica Group]|EEE54196.1 hypothetical protein OsJ_01031 [Oryza sativa Japonica Group]|BAF04443.2 Os01g0236400 [Oryza sativa Japonica Group]|BAS7123…
LOC_Os01g13540.MSUv7.0	1508	1763	2215	1483	1426	1345	23.392	28.3211	33.3653	25.42	21.218	22.1964	XP_015613020.1	protein NLP3 [Oryza sativa Japonica Group]|Q5NB82.1 RecName: Full=Protein NLP3; Short=AtNLP3; AltName: Full=NIN-like protein 3; AltName: Full=Nodule inception protein-like protein 3|BAD81274.1 nodule inception protein -like [Oryza sativa Japonica Group]|BAF04444.1 Os01g0236700 [Oryza sativa Japonica Group]|EAZ11184.1 hypothetical protein OsJ_01032 [Oryza sativa Japonica Group]|BAS71232.1 Os01g023…
LOC_Os01g13550.MSUv7.0	616	568	529	687	785	657	17.2428	16.4651	14.3793	21.2496	21.0772	19.5652	XP_015613032.1	beta-amylase 1, chloroplastic-like [Oryza sativa Japonica Group]|BAD81275.1 putative beta-amylase PCT-BMYI [Oryza sativa Japonica Group]|BAS71234.1 Os01g0236800 [Oryza sativa Japonica Group]
LOC_Os01g13560.MSUv7.0	190	151	95	148	324	246	8.8735	7.30313	4.30844	7.63785	14.5146	12.2228	XP_015634431.1	CASP-like protein 1C1 [Oryza sativa Japonica Group]|Q9LI17.1 RecName: Full=CASP-like protein 1C1; Short=OsCASPL1C1|A2WMK7.1 RecName: Full=CASP-like protein 1C1-2; Short=OsCASPL1C1-2|BAA92922.1 unknown protein [Oryza sativa Japonica Group]|BAF04446.1 Os01g0237000 [Oryza sativa Japonica Group]|EAY73203.1 hypothetical protein OsI_01075 [Oryza sativa Indica Group]|EAZ11186.1 hypothetical protein OsJ_…
LOC_Os01g13570.MSUv7.0	18	41	27	12	32	32	0.760262	1.79335	1.10741	0.560067	1.29646	1.43792	XP_015626961.1	probable 2-carboxy-D-arabinitol-1-phosphatase [Oryza sativa Japonica Group]|BAD81276.1 phosphoglycerate mutase -like [Oryza sativa Japonica Group]|BAD81470.1 phosphoglycerate mutase -like [Oryza sativa Japonica Group]|BAF04447.1 Os01g0237100 [Oryza sativa Japonica Group]|BAG87632.1 unnamed protein product [Oryza sativa Japonica Group]|BAG91058.1 unnamed protein product [Oryza sativa Japonica Grou…
LOC_Os01g13590.MSUv7.0	0	0	1	0	0	2	0	0	0.138287	0	0	0.303004	XP_015626983.1	isoflavone reductase-like protein [Oryza sativa Japonica Group]
LOC_Os01g13600.MSUv7.0	2	0	4	0	0	0	0.182878	0	0.355178	0	0	0	BAD81277.1	putative isoflavone reductase homolog IRL [Oryza sativa Japonica Group]|BAD81471.1 putative isoflavone reductase homolog IRL [Oryza sativa Japonica Group]
LOC_Os01g13610.MSUv7.0	566	582	610	125	55	1181	22.1472	23.5839	23.1786	5.4048	2.06434	49.1637	BAS71243.1	Os01g0237750 [Oryza sativa Japonica Group]
LOC_Os01g13660.MSUv7.0	1336	1228	1484	1438	1208	1021	48.6261	46.2862	52.4508	57.8348	42.1743	39.535	XP_015644589.1	uncharacterized protein LOC4326356 [Oryza sativa Japonica Group]|XP_015644662.1 uncharacterized protein LOC4326356 [Oryza sativa Japonica Group]|XP_015644732.1 uncharacterized protein LOC4326356 [Oryza sativa Japonica Group]|XP_015644808.1 uncharacterized protein LOC4326356 [Oryza sativa Japonica Group]|BAB17200.1 unknown protein [Oryza sativa Japonica Group]|BAF04449.1 Os01g0238200 [Oryza sativa…
LOC_Os01g13670.MSUv7.0	0	0	0	0	1	0	0	0	0	0	0.144912	0	BAD81478.1	hypothetical protein [Oryza sativa Japonica Group]
LOC_Os01g13690.MSUv7.0	680	914	1562	659	400	532	17.6239	24.5319	39.3124	18.8733	9.94424	14.6689	XP_015621951.1	D-amino-acid transaminase, chloroplastic isoform X1 [Oryza sativa Japonica Group]|BAD81481.1 branched-chain amino acid aminotransferase -like [Oryza sativa Japonica Group]|BAF04451.1 Os01g0238500 [Oryza sativa Japonica Group]|EAY73210.1 hypothetical protein OsI_01081 [Oryza sativa Indica Group]|BAS71248.1 Os01g0238500 [Oryza sativa Japonica Group]
LOC_Os01g13700.MSUv7.0	483	442	779	473	334	390	28.4452	26.9572	44.5508	30.7816	18.868	24.4355	XP_015632156.1	uncharacterized protein At4g28440 [Oryza sativa Japonica Group]|BAB17204.1 unknown protein [Oryza sativa Japonica Group]|BAF04452.1 Os01g0238600 [Oryza sativa Japonica Group]|EAZ11193.1 hypothetical protein OsJ_01043 [Oryza sativa Japonica Group]|BAG93633.1 unnamed protein product [Oryza sativa Japonica Group]|BAS71249.1 Os01g0238600 [Oryza sativa Japonica Group]
LOC_Os01g13710.MSUv7.0	0	3	5	0	1	1	0	0.0681795	0.106553	0	0.0210504	0.0233472	XP_015632041.1	probable metal-nicotianamine transporter YSL1 [Oryza sativa Japonica Group]|Q9FTU1.1 RecName: Full=Probable metal-nicotianamine transporter YSL1; AltName: Full=Protein YELLOW STRIPE LIKE 1; Short=OsYSL1|BAB17205.1 unknown protein [Oryza sativa Japonica Group]|BAE91882.1 hypothetical protein [Oryza sativa Japonica Group]|BAF04453.1 Os01g0238700 [Oryza sativa Japonica Group]|BAH00290.1 unnamed prot…
LOC_Os01g13720.MSUv7.0	87	80	135	98	99	79	6.35968	6.05615	9.58308	7.91608	6.94175	6.1438	BAS71253.1	Os01g0238850, partial [Oryza sativa Japonica Group]
LOC_Os01g13730.MSUv7.0	1675	1637	1694	2204	2468	1917	44.8158	45.3582	44.0135	65.1623	63.3403	54.5673	XP_015615923.1	DDB1- and CUL4-associated factor 13 [Oryza sativa Japonica Group]|EEE54204.1 hypothetical protein OsJ_01046 [Oryza sativa Japonica Group]
LOC_Os01g13740.MSUv7.0	4	0	0	4	1	0	0.0802157	0	0	0.0886395	0.0192361	0	XP_015615905.1	probable transcription factor GLK2 isoform X1 [Oryza sativa Japonica Group]|Q5NAN5.1 RecName: Full=Probable transcription factor GLK2; AltName: Full=Golden2-like protein 2; Short=OsGLK2|BAD81484.1 putative transcription factor OsGLK2 [Oryza sativa Japonica Group]|BAF04456.1 Os01g0239000 [Oryza sativa Japonica Group]|BAH00278.1 unnamed protein product [Oryza sativa Japonica Group]|BAS71255.1 Os01g…
LOC_Os01g13760.MSUv7.0	443	426	344	574	710	498	4.39209	4.37389	3.31193	6.28851	6.75218	5.2528	XP_015619091.1	dnaJ homolog subfamily B member 1 [Oryza sativa Japonica Group]|BAB17212.1 putative DnaJ-like protein [Oryza sativa Japonica Group]|BAB40091.1 putative DnaJ-like protein [Oryza sativa Japonica Group]|BAF04457.1 Os01g0239100 [Oryza sativa Japonica Group]|EAZ11198.1 hypothetical protein OsJ_01048 [Oryza sativa Japonica Group]|ACJ54889.1 heat shock protein [Oryza sativa Japonica Group]|BAS71259.1 Os…
LOC_Os01g13770.MSUv7.0	98	92	132	61	96	96	2.29151	2.22779	2.99726	1.57613	2.1532	2.38814	XP_015619081.1	triose phosphate/phosphate translocator TPT, chloroplastic [Oryza sativa Japonica Group]|Q9FTT3.1 RecName: Full=Triose phosphate/phosphate translocator TPT, chloroplastic; Flags: Precursor|BAB17213.1 putative triose phosphate/phosphate translocator [Oryza sativa Japonica Group]|BAB40092.1 putative triose phosphate/phosphate translocator [Oryza sativa Japonica Group]|BAF04458.1 Os01g0239200 [Oryza…
LOC_Os01g13780.MSUv7.0	5	0	6	0	2	1	0.208314	0	0.242748	0	0.0799275	0.0443243	EEC70274.1	hypothetical protein OsI_01092 [Oryza sativa Indica Group]
LOC_Os01g13800.MSUv7.0	1448	1193	1506	1140	1637	784	20.0665	17.1212	20.2667	17.4572	21.7605	11.5588	XP_015618708.1	receptor-like protein kinase HSL1 [Oryza sativa Japonica Group]|BAB40094.1 putative leucine-rich receptor-like protein kinase [Oryza sativa Japonica Group]|BAF04460.1 Os01g0239700 [Oryza sativa Japonica Group]|BAG90563.1 unnamed protein product [Oryza sativa Japonica Group]|BAH00809.1 unnamed protein product [Oryza sativa Japonica Group]|BAS71262.1 Os01g0239700 [Oryza sativa Japonica Group]
LOC_Os01g13930.MSUv7.0	103	166	142	94	101	80	3.35733	5.60346	4.4947	3.38574	3.15789	2.77422	XP_015627824.1	uncharacterized protein LOC4327688 [Oryza sativa Japonica Group]|BAB40104.1 unknown protein [Oryza sativa Japonica Group]|BAF04464.1 Os01g0241000 [Oryza sativa Japonica Group]|EAY73235.1 hypothetical protein OsI_01112 [Oryza sativa Indica Group]|EAZ11208.1 hypothetical protein OsJ_01062 [Oryza sativa Japonica Group]|BAG99776.1 unnamed protein product [Oryza sativa Japonica Group]|BAS71272.1 Os01g…
LOC_Os01g13940.MSUv7.0	145	152	169	149	174	126	3.76553	4.08783	4.26187	4.27575	4.33436	3.48115	XP_015627084.1	uncharacterized protein LOC4327689 [Oryza sativa Japonica Group]|BAD81619.1 unknown protein [Oryza sativa Japonica Group]|BAD81649.1 unknown protein [Oryza sativa Japonica Group]|EAZ11209.1 hypothetical protein OsJ_01063 [Oryza sativa Japonica Group]|BAH01334.1 unnamed protein product [Oryza sativa Japonica Group]|BAS71273.1 Os01g0241100 [Oryza sativa Japonica Group]
LOC_Os01g13950.MSUv7.0	3	11	2	4	3	1	0.226281	0.859233	0.146492	0.333392	0.217053	0.0802456	BAD81621.1	unknown protein [Oryza sativa Japonica Group]|BAD81651.1 unknown protein [Oryza sativa Japonica Group]|EAY73237.1 hypothetical protein OsI_01115 [Oryza sativa Indica Group]|EAZ11210.1 hypothetical protein OsJ_01065 [Oryza sativa Japonica Group]
LOC_Os01g14010.MSUv7.0	138	146	182	160	90	86	3.40075	3.72597	4.35534	4.35696	2.12743	2.25469	XP_015634949.1	zinc finger protein NUTCRACKER [Oryza sativa Japonica Group]
LOC_Os01g14020.MSUv7.0	109	75	102	59	52	83	5.28474	3.76573	4.80234	3.16095	2.41835	4.28123	PKA59106.1	hypothetical protein AXF42_Ash001199 [Apostasia shenzhenica]
LOC_Os01g14030.MSUv7.0	3	0	4	0	0	0	0.126097	0	0.163267	0	0	0	XP_015644107.1	protein ASYMMETRIC LEAVES 2 [Oryza sativa Japonica Group]|BAD81626.1 unknown protein [Oryza sativa Japonica Group]|BAF04469.1 Os01g0242400 [Oryza sativa Japonica Group]|BAG98504.1 unnamed protein product [Oryza sativa Japonica Group]|BAS71277.1 Os01g0242400 [Oryza sativa Japonica Group]
LOC_Os01g14040.MSUv7.0	183	181	257	154	126	129	9.88393	10.1239	13.4793	9.19109	6.5278	7.41245	XP_015644219.1	D-aminoacyl-tRNA deacylase [Oryza sativa Japonica Group]|BAD81627.1 putative histidyl-tRNA synthetase 2 [Oryza sativa Japonica Group]|BAF04470.1 Os01g0242500 [Oryza sativa Japonica Group]|EAY73244.1 hypothetical protein OsI_01121 [Oryza sativa Indica Group]|EAZ11214.1 hypothetical protein OsJ_01069 [Oryza sativa Japonica Group]|BAG93595.1 unnamed protein product [Oryza sativa Japonica Group]|BAS7…
LOC_Os01g14050.MSUv7.0	5343	3795	3365	4219	3121	3128	108.823	80.0457	66.5542	94.9539	60.9743	67.7791	XP_015621685.1	C2 domain-containing protein At1g53590 isoform X1 [Oryza sativa Japonica Group]|BAD81628.1 C2 domain-containing protein-like [Oryza sativa Japonica Group]|BAG90582.1 unnamed protein product [Oryza sativa Japonica Group]|BAG93778.1 unnamed protein product [Oryza sativa Japonica Group]|EEE54215.1 hypothetical protein OsJ_01070 [Oryza sativa Japonica Group]|BAF04471.2 Os01g0242600 [Oryza sativa Japo…
LOC_Os01g14060.MSUv7.0	7	0	3	5	1	2	0.452095	0	0.188152	0.356837	0.0619512	0.137422	BAD81629.1	hypothetical protein [Oryza sativa Japonica Group]
LOC_Os01g14070.MSUv7.0	320	330	335	288	175	229	22.2379	23.7492	22.6071	22.1159	11.6654	16.9306	BAS71283.1	Os01g0242900, partial [Oryza sativa Japonica Group]
LOC_Os01g14080.MSUv7.0	20	31	13	24	16	37	0.676885	1.08652	0.427252	0.897561	0.519425	1.33223	XP_015630157.1	GDSL esterase/lipase At4g10955 [Oryza sativa Japonica Group]|BAD81632.1 unknown protein [Oryza sativa Japonica Group]|EAZ11217.1 hypothetical protein OsJ_01072 [Oryza sativa Japonica Group]|BAG88656.1 unnamed protein product [Oryza sativa Japonica Group]|BAS71284.1 Os01g0243000 [Oryza sativa Japonica Group]
LOC_Os01g14090.MSUv7.0	156	105	116	271	355	427	4.39975	3.06679	3.177	8.4458	9.60395	12.8122	BAF04475.1	Os01g0243100, partial [Oryza sativa Japonica Group]|BAS71285.1 Os01g0243100, partial [Oryza sativa Japonica Group]
LOC_Os01g14100.MSUv7.0	1382	1250	1179	1049	951	1038	22.1836	20.779	18.3778	18.6066	14.6427	17.7261	BAF04476.1	Os01g0243200 [Oryza sativa Japonica Group]|BAG95956.1 unnamed protein product [Oryza sativa Japonica Group]|BAS71286.1 Os01g0243200 [Oryza sativa Japonica Group]
LOC_Os01g14110.MSUv7.0	385	411	405	324	165	271	30.6824	33.9204	31.3428	28.5326	12.6133	22.9769	EAY73253.1	hypothetical protein OsI_01129 [Oryza sativa Indica Group]
LOC_Os01g14120.MSUv7.0	1	3	2	0	0	1	0.149771	0.465306	0.290879	0	0	0.159338	BAD81596.1	hypothetical protein [Oryza sativa Japonica Group]|BAD81635.1 hypothetical protein [Oryza sativa Japonica Group]
LOC_Os01g14130.MSUv7.0	19	9	11	20	17	20	1.02514	0.502877	0.576337	1.19241	0.879823	1.14803	XP_015641257.1	uncharacterized protein LOC4326748 [Oryza sativa Japonica Group]|BAB89447.1 hypothetical protein [Oryza sativa Japonica Group]|BAB93127.1 hypothetical protein [Oryza sativa Japonica Group]|BAF04479.1 Os01g0243600 [Oryza sativa Japonica Group]|EAZ11222.1 hypothetical protein OsJ_01076 [Oryza sativa Japonica Group]|BAS71291.1 Os01g0243600 [Oryza sativa Japonica Group]
LOC_Os01g14140.MSUv7.0	79	52	91	88	85	102	5.37532	3.66413	6.01276	6.61649	5.54771	7.38364	XP_006643985.1	PREDICTED: glucan endo-1,3-beta-D-glucosidase-like [Oryza brachyantha]
LOC_Os01g14200.MSUv7.0	6	1	1	4	0	7	0.0414639	0.00715665	0.0067108	0.0305455	0	0.0514649	BAF04484.1	Os01g0244200 [Oryza sativa Japonica Group]
LOC_Os01g14220.MSUv7.0	0	1	0	0	0	0	0	0.0330935	0	0	0	0	BAS71297.1	Os01g0244400, partial [Oryza sativa Japonica Group]
LOC_Os01g14270.MSUv7.0	0	0	0	0	4	0	0	0	0	0	0.105977	0	BAD81609.1	hypothetical protein [Oryza sativa Japonica Group]
LOC_Os01g14370.MSUv7.0	1511	1477	1368	1346	1845	1633	17.4311	17.6454	15.325	17.1582	20.4161	20.0419	BAE95818.1	putative p300/CBP acetyltransferase-related protein 2 [Oryza sativa Japonica Group]
LOC_Os01g14410.MSUv7.0	1	5	1	1	1	1	0.0544052	0.281709	0.0528318	0.0601185	0.0521865	0.0578807	XP_015630605.1	high molecular mass early light-inducible protein HV58, chloroplastic [Oryza sativa Japonica Group]|AAD38281.1 putative low molecular early light-inducible protein [Oryza sativa Japonica Group]|BAB40069.1 putative early light-induced protein precursor [Oryza sativa Japonica Group]|BAF04488.1 Os01g0246400 [Oryza sativa Japonica Group]|EAZ11235.1 hypothetical protein OsJ_01089 [Oryza sativa Japonic…
LOC_Os01g14420.MSUv7.0	316	313	299	309	235	274	11.8489	12.1542	10.8872	12.8032	8.45233	10.9304	AAD38282.1	hypothetical protein [Oryza sativa Japonica Group]
LOC_Os01g14430.MSUv7.0	14	41	19	26	3	38	1.02483	3.10814	1.35062	2.10313	0.210652	2.95939	XP_015644097.1	AT-hook motif nuclear-localized protein 21 [Oryza sativa Japonica Group]|BAE95821.1 DNA-binding protein-like [Oryza sativa Japonica Group]|BAH90985.1 Os01g0246601 [Oryza sativa Japonica Group]|BAS71316.1 Os01g0246601 [Oryza sativa Japonica Group]
LOC_Os01g14440.MSUv7.0	2096	3312	2543	1588	1054	2506	51.6764	84.5633	60.8839	43.2632	24.9264	65.7318	AAD38283.1	putative WRKY DNA binding protein [Oryza sativa Japonica Group]
LOC_Os01g14510.MSUv7.0	9	18	9	0	2	4	0.265168	0.549213	0.257499	0	0.0565231	0.125381	XP_015631011.1	receptor-like serine/threonine-protein kinase At1g78530 [Oryza sativa Japonica Group]|BAF04492.1 Os01g0247500 [Oryza sativa Japonica Group]|BAG89586.1 unnamed protein product [Oryza sativa Japonica Group]|BAS71319.1 Os01g0247500 [Oryza sativa Japonica Group]
LOC_Os01g14520.MSUv7.0	2117	1891	3338	898	1568	1148	40.0067	37.0078	61.2566	18.7523	28.4234	23.0806	BAS71322.1	Os01g0247700, partial [Oryza sativa Japonica Group]
LOC_Os01g14530.MSUv7.0	27	22	19	25	17	15	1.54983	1.30778	1.05908	1.58572	0.936023	0.916019	AAD38289.1	putative ABA induced plasma membrane protein [Oryza sativa Japonica Group]
LOC_Os01g14550.MSUv7.0	801	598	887	1323	2390	914	40.0655	30.9763	43.0841	73.125	114.671	48.6382	XP_015633356.1	pathogen-related protein [Oryza sativa Japonica Group]|AAD38290.1 putative pathogenesis related protein [Oryza sativa Japonica Group]|BAB18330.1 putative pathogenesis related protein [Oryza sativa Japonica Group]|BAF04496.1 Os01g0248300 [Oryza sativa Japonica Group]|BAS71326.1 Os01g0248300 [Oryza sativa Japonica Group]
LOC_Os01g14580.MSUv7.0	539	599	734	350	380	554	11.985	13.7932	15.8489	8.59971	8.10494	13.1054	XP_020198437.1	cytosolic isocitrate dehydrogenase [NADP] isoform X1 [Aegilops tauschii subsp. tauschii]|XP_020198443.1 cytosolic isocitrate dehydrogenase [NADP] isoform X1 [Aegilops tauschii subsp. tauschii]|XP_020198450.1 cytosolic isocitrate dehydrogenase [NADP] isoform X1 [Aegilops tauschii subsp. tauschii]
LOC_Os01g14590.MSUv7.0	249	287	267	30	23	130	8.51569	10.1647	8.86722	1.13373	0.754513	4.72996	XP_015614171.1	pathogen-related protein [Oryza sativa Japonica Group]|AAD38293.1 putative pathogenesis related protein [Oryza sativa Japonica Group]|BAB18332.1 putative pathogenesis related protein [Oryza sativa Japonica Group]|BAF04498.1 Os01g0248500 [Oryza sativa Japonica Group]|BAG87196.1 unnamed protein product [Oryza sativa Japonica Group]|BAS71329.1 Os01g0248500 [Oryza sativa Japonica Group]
LOC_Os01g14610.MSUv7.0	699	704	707	674	811	590	26.6121	27.7566	26.1383	28.355	29.617	23.8972	AAD38294.1	unknown protein [Oryza sativa Japonica Group]
LOC_Os01g14630.MSUv7.0	20	53	39	14	7	28	0.752095	2.064	1.42417	0.581753	0.252498	1.1202	BAS71331.1	Os01g0248701 [Oryza sativa Japonica Group]
LOC_Os01g14640.MSUv7.0	4	8	12	2	1	6	0.326261	0.675749	0.950477	0.180261	0.0782389	0.520655	XP_015643445.1	uncharacterized protein LOC4327216 [Oryza sativa Japonica Group]
LOC_Os01g14650.MSUv7.0	10	49	10	11	0	10	0.500674	2.54063	0.486195	0.608577	0	0.532658	XP_015632452.1	expansin-A8 [Oryza sativa Japonica Group]|Q9XHX0.1 RecName: Full=Expansin-A8; AltName: Full=Alpha-expansin-8; AltName: Full=OsEXP8; AltName: Full=OsEXPA8; AltName: Full=OsaEXPa1.17; Flags: Precursor|AAD38296.1 putative expansin [Oryza sativa Japonica Group]|BAB18336.1 putative expansin Os-EXPA3 [Oryza sativa Japonica Group]|BAF04501.1 Os01g0248900 [Oryza sativa Japonica Group]|EAY73300.1 hypothet…
LOC_Os01g14660.MSUv7.0	11	0	13	4	4	5	0.712201	0	0.817351	0.286179	0.248421	0.344408	XP_015642130.1	expansin-A9 [Oryza sativa Japonica Group]|Q4PR53.2 RecName: Full=Expansin-A9; AltName: Full=Alpha-expansin-9; AltName: Full=OsEXP9; AltName: Full=OsEXPA9; AltName: Full=OsaEXPa1.19; Flags: Precursor|AAD38297.1 putative expansin [Oryza sativa Japonica Group]|BAB18338.1 putative expansin Os-EXPA3 [Oryza sativa Japonica Group]|BAF04502.1 Os01g0249100 [Oryza sativa Japonica Group]
LOC_Os01g14670.MSUv7.0	1021	916	1722	914	640	681	48.1145	44.703	78.8023	47.5954	28.93	34.1422	XP_015612310.1	germin-like protein 5-1 [Oryza sativa Japonica Group]|AAD38298.1 putative oxalate oxidase (germin protein) [Oryza sativa Japonica Group]|BAB18339.1 putative nectarin I [Oryza sativa Japonica Group]|BAF04503.1 Os01g0249200 [Oryza sativa Japonica Group]|EAZ11253.1 hypothetical protein OsJ_01106 [Oryza sativa Japonica Group]|BAG87694.1 unnamed protein product [Oryza sativa Japonica Group]|BAS71338.1…
LOC_Os01g14690.MSUv7.0	1505	1690	2065	1494	1076	1233	72.8327	84.6969	97.0433	79.893	49.9482	63.4814	XP_015622478.1	uncharacterized protein LOC4327220 isoform X2 [Oryza sativa Japonica Group]|XP_015622479.1 uncharacterized protein LOC4327220 isoform X2 [Oryza sativa Japonica Group]|XP_015622481.1 uncharacterized protein LOC4327220 isoform X2 [Oryza sativa Japonica Group]|XP_015622482.1 uncharacterized protein LOC4327220 isoform X2 [Oryza sativa Japonica Group]|XP_015622483.1 uncharacterized protein LOC4327220 …
LOC_Os01g14700.MSUv7.0	4	1	3	6	0	3	0.458199	0.118627	0.333711	0.759475	0	0.365602	XP_015645365.1	heavy metal-associated isoprenylated plant protein 43 [Oryza sativa Japonica Group]|BAA92194.1 hypothetical protein [Oryza sativa Japonica Group]|EEC70320.1 hypothetical protein OsI_01188 [Oryza sativa Indica Group]
LOC_Os01g14720.MSUv7.0	0	1	3	3	0	0	0	0.0446447	0.12559	0.142912	0	0	BAD81210.1	unknown protein [Oryza sativa Japonica Group]|BAF04505.1 Os01g0249900 [Oryza sativa Japonica Group]|BAG93190.1 unnamed protein product [Oryza sativa Japonica Group]|BAS71343.1 Os01g0249900 [Oryza sativa Japonica Group]
LOC_Os01g14770.MSUv7.0	0	1	0	2	3	0	0	0.00756383	0	0.0161417	0.0210179	0	XP_025879790.1	uncharacterized protein LOC112938271 [Oryza sativa Japonica Group]
LOC_Os01g14790.MSUv7.0	482	435	531	428	454	375	25.9792	24.2806	27.7926	25.4912	23.4722	21.5032	BAS71345.1	Os01g0250401 [Oryza sativa Japonica Group]
LOC_Os01g14810.MSUv7.0	973	998	1087	920	1237	1055	17.7566	18.8612	19.2634	18.5525	21.6538	20.483	EAY73316.1	hypothetical protein OsI_01189 [Oryza sativa Indica Group]
LOC_Os01g14820.MSUv7.0	691	597	750	659	951	624	17.8735	15.9917	18.8385	18.8358	23.5955	17.1715	EEE54240.1	hypothetical protein OsJ_01114 [Oryza sativa Japonica Group]
LOC_Os01g14830.MSUv7.0	360	417	480	383	419	402	13.0029	15.5979	16.8359	15.2864	14.5168	15.4475	XP_015617381.1	50S ribosomal protein L3-2, chloroplastic [Oryza sativa Japonica Group]|BAA92206.1 putative ribosomal protein L3 [Oryza sativa Japonica Group]|BAF04513.1 Os01g0251100 [Oryza sativa Japonica Group]|BAG95224.1 unnamed protein product [Oryza sativa Japonica Group]|BAG93634.1 unnamed protein product [Oryza sativa Japonica Group]|EEE54241.1 hypothetical protein OsJ_01115 [Oryza sativa Japonica Group]|…
LOC_Os01g14840.MSUv7.0	596	480	512	464	411	363	11.7177	9.773	9.7751	10.0805	7.75096	7.5927	EEC70324.1	hypothetical protein OsI_01193 [Oryza sativa Indica Group]
LOC_Os01g14850.MSUv7.0	0	0	0	0	0	1	0	0	0	0	0	0.0549551	XP_015610893.1	MFS18 protein [Oryza sativa Japonica Group]|BAA92209.1 putative structural protein [Oryza sativa Japonica Group]|EAZ11266.1 hypothetical protein OsJ_01118 [Oryza sativa Japonica Group]
LOC_Os01g14860.MSUv7.0	1979	2248	2273	1612	1457	1652	33.6528	39.5879	37.5344	30.2906	23.7658	29.8868	XP_008672929.1	uncharacterized protein LOC100283734 isoform X1 [Zea mays]
LOC_Os01g14870.MSUv7.0	191	194	216	129	159	162	5.77768	6.07733	6.34497	4.31199	4.61355	5.2135	BAF04517.1	Os01g0252200, partial [Oryza sativa Japonica Group]
LOC_Os01g14880.MSUv7.0	19	32	33	19	3	7	4.07524	7.10788	6.87335	4.5032	0.617218	1.59732	BAD81096.1	unknown protein [Oryza sativa Japonica Group]|BAD81227.1 unknown protein [Oryza sativa Japonica Group]|BAH01280.1 unnamed protein product [Oryza sativa Japonica Group]|EEE54246.1 hypothetical protein OsJ_01121 [Oryza sativa Japonica Group]|BAH90989.1 Os01g0252250 [Oryza sativa Japonica Group]|BAS71357.1 Os01g0252300 [Oryza sativa Japonica Group]
LOC_Os01g14900.MSUv7.0	1	0	3	5	13	7	0.0275476	0	0.080253	0.152203	0.343515	0.205152	XP_015637172.2	probable glycerol-3-phosphate acyltransferase 3 [Oryza sativa Japonica Group]|BAA87849.1 hypothetical protein [Oryza sativa Japonica Group]|BAA92218.1 hypothetical protein [Oryza sativa Japonica Group]|BAF04520.1 Os01g0252700 [Oryza sativa Japonica Group]
LOC_Os01g14920.MSUv7.0	202	195	204	162	251	180	8.59451	8.59201	8.42859	7.61645	10.2438	8.14771	BAD81102.1	unknown protein [Oryza sativa Japonica Group]|BAD81233.1 unknown protein [Oryza sativa Japonica Group]|BAF04521.1 Os01g0252900 [Oryza sativa Japonica Group]|BAG97157.1 unnamed protein product [Oryza sativa Japonica Group]|BAS71360.1 Os01g0252900 [Oryza sativa Japonica Group]
LOC_Os01g14926.MSUv7.0	0	1	0	0	2	0	0	0.0325153	0	0	0.0602345	0	BAD81103.1	putative receptor-like protein kinase [Oryza sativa Japonica Group]|BAD81234.1 putative receptor-like protein kinase [Oryza sativa Japonica Group]
LOC_Os01g14932.MSUv7.0	1446	1466	1473	1071	1243	1105	26.6687	28	26.381	21.8268	21.9899	21.6815	BAD81104.1	putative protein kinase [Oryza sativa Japonica Group]|BAF04523.1 Os01g0253100 [Oryza sativa Japonica Group]|BAS71363.1 Os01g0253100 [Oryza sativa Japonica Group]
LOC_Os01g14950.MSUv7.0	10511	8668	9243	14305	18692	13360	249.811	213.342	213.322	375.684	426.129	337.806	EAY73327.1	hypothetical protein OsI_01204 [Oryza sativa Indica Group]
LOC_Os01g14960.MSUv7.0	33	37	69	15	19	23	1.44778	1.68105	2.93964	0.727191	0.799578	1.07352	XP_015644021.1	uncharacterized protein LOC4327705 [Oryza sativa Japonica Group]|BAF04526.1 Os01g0253400 [Oryza sativa Japonica Group]|BAG98559.1 unnamed protein product [Oryza sativa Japonica Group]|BAS71367.1 Os01g0253400 [Oryza sativa Japonica Group]
LOC_Os01g14970.MSUv7.0	142	54	107	57	22	37	5.47821	2.15742	4.00857	2.42993	0.814125	1.51861	XP_015641978.1	putative protein TPRXL [Oryza sativa Japonica Group]|BAA84606.1 hypothetical protein [Oryza sativa Japonica Group]|BAA87857.1 hypothetical protein [Oryza sativa Japonica Group]|BAH01692.1 unnamed protein product [Oryza sativa Japonica Group]|BAH90991.1 Os01g0253500 [Oryza sativa Japonica Group]|BAS71368.1 Os01g0253500 [Oryza sativa Japonica Group]
LOC_Os01g14980.MSUv7.0	273	298	342	297	247	290	17.2889	19.544	21.0323	20.7841	15.0045	19.5388	EEC70336.1	hypothetical protein OsI_01213 [Oryza sativa Indica Group]
LOC_Os01g14990.MSUv7.0	10	9	11	0	0	7	0.616077	0.574207	0.658087	0	0	0.458804	XP_015644910.1	uncharacterized protein LOC9269417 [Oryza sativa Japonica Group]|BAD81064.1 hypothetical protein [Oryza sativa Japonica Group]|BAH90992.1 Os01g0253800 [Oryza sativa Japonica Group]|BAS71371.1 Os01g0253800 [Oryza sativa Japonica Group]
LOC_Os01g15000.MSUv7.0	227	262	254	315	191	676	4.32114	5.16493	4.69528	6.62599	3.48757	13.6903	BAD81065.1	unknown protein [Oryza sativa Japonica Group]|BAF04528.1 Os01g0253900 [Oryza sativa Japonica Group]|BAS71372.1 Os01g0253900 [Oryza sativa Japonica Group]
LOC_Os01g15010.MSUv7.0	1066	1314	1117	1227	1202	1332	45.0609	57.5213	45.8512	57.3133	48.7377	59.9019	XP_015621249.1	GTP-binding protein SAR1A [Oryza sativa Japonica Group]|BAA84612.1 putative small GTP-binding protein Bsar1a [Oryza sativa Japonica Group]|AAT28677.1 GTP-binding protein [Oryza sativa Japonica Group]|BAF04529.1 Os01g0254000 [Oryza sativa Japonica Group]|BAG99470.1 unnamed protein product [Oryza sativa Japonica Group]|BAG99499.1 unnamed protein product [Oryza sativa Japonica Group]|BAG99684.1 unna…
LOC_Os01g15020.MSUv7.0	6002	5915	5951	4576	4655	5107	74.5532	76.0879	71.782	62.8093	55.4636	67.4885	EAY73338.1	hypothetical protein OsI_01216 [Oryza sativa Indica Group]
LOC_Os01g15029.MSUv7.0	642	728	786	657	339	540	49.4987	58.1274	58.8487	55.9748	25.0713	44.2941	XP_025880184.1	uncharacterized protein LOC4327710 [Oryza sativa Japonica Group]|BAA84617.1 unknown protein [Oryza sativa Japonica Group]|BAA85192.1 unknown protein [Oryza sativa Japonica Group]|BAF04531.1 Os01g0254200 [Oryza sativa Japonica Group]|EAY73339.1 hypothetical protein OsI_01217 [Oryza sativa Indica Group]|EAZ11281.1 hypothetical protein OsJ_01135 [Oryza sativa Japonica Group]|BAS71377.1 Os01g0254200 …
LOC_Os01g15039.MSUv7.0	12	12	5	15	2	3	0.286506	0.296704	0.115925	0.395741	0.0458036	0.0762021	XP_015640626.1	putative pectinesterase/pectinesterase inhibitor 22 [Oryza sativa Japonica Group]|BAA84618.1 putative pectinesterase [Oryza sativa Japonica Group]|BAA85193.1 putative pectinesterase [Oryza sativa Japonica Group]|BAS71378.1 Os01g0254300 [Oryza sativa Japonica Group]
LOC_Os01g15060.MSUv7.0	6	43	47	10	1	13	0.459208	3.40814	3.49311	0.84572	0.0734136	1.05851	XP_015640637.1	uncharacterized protein LOC107277409 [Oryza sativa Japonica Group]|BAD81069.1 hypothetical protein [Oryza sativa Japonica Group]|BAE95788.1 hypothetical protein [Oryza sativa Japonica Group]|EAZ11283.1 hypothetical protein OsJ_01138 [Oryza sativa Japonica Group]|BAS71380.1 Os01g0254400 [Oryza sativa Japonica Group]
LOC_Os01g15100.MSUv7.0	28	51	38	65	43	40	2.77974	5.24333	3.66341	7.13063	4.0948	4.22474	BAS71383.1	Os01g0254850, partial [Oryza sativa Japonica Group]
LOC_Os01g15110.MSUv7.0	2202	2389	2382	2608	2280	2308	63.3381	71.163	66.5341	82.894	62.9072	70.628	BAS71385.1	Os01g0254950, partial [Oryza sativa Japonica Group]
LOC_Os01g15120.MSUv7.0	697	680	791	729	826	695	26.8696	27.1474	29.6115	31.0545	30.5441	28.5041	EAZ11286.1	hypothetical protein OsJ_01142 [Oryza sativa Japonica Group]
LOC_Os01g15130.MSUv7.0	5	4	6	4	7	5	0.189804	0.157248	0.221178	0.167789	0.254889	0.201929	XP_015622211.1	uncharacterized protein LOC4327715 [Oryza sativa Japonica Group]|BAD81074.1 putative epoxide hydrolase [Oryza sativa Japonica Group]|BAE95793.1 putative epoxide hydrolase [Oryza sativa Japonica Group]|BAF04536.1 Os01g0255100 [Oryza sativa Japonica Group]|EAZ11287.1 hypothetical protein OsJ_01143 [Oryza sativa Japonica Group]|BAG86722.1 unnamed protein product [Oryza sativa Japonica Group]|BAS7138…
LOC_Os01g15170.MSUv7.0	3	1	2	7	3	4	0.275768	0.0951948	0.178529	0.711031	0.264522	0.39118	EAY73353.1	hypothetical protein OsI_01230 [Oryza sativa Indica Group]
LOC_Os01g15210.MSUv7.0	7	8	4	3	0	6	0.308664	0.365316	0.171279	0.146176	0	0.281471	EAZ11291.1	hypothetical protein OsJ_01146 [Oryza sativa Japonica Group]
LOC_Os01g15220.MSUv7.0	25	33	33	14	9	25	2.15017	2.93926	2.75615	1.33054	0.742495	2.28753	BAS71389.1	Os01g0255700, partial [Oryza sativa Japonica Group]
LOC_Os01g15240.MSUv7.0	0	0	0	0	2	0	0	0	0	0	0.141228	0	BAD81082.1	hypothetical protein [Oryza sativa Japonica Group]|BAE95801.1 hypothetical protein [Oryza sativa Japonica Group]
LOC_Os01g15250.MSUv7.0	40	31	62	55	47	31	1.52398	1.22313	2.29386	2.31553	1.71765	1.25654	BAE95802.1	hypothetical protein [Oryza sativa Japonica Group]
LOC_Os01g15260.MSUv7.0	497	565	671	603	491	488	26.4054	31.0868	34.619	35.4015	25.0228	27.5835	EAZ37075.1	hypothetical protein OsJ_21416 [Oryza sativa Japonica Group]
LOC_Os01g15270.MSUv7.0	242375	199769	240486	295930	419550	287646	14067.5	12007.4	13554.2	18979.6	23357.7	17761.6	BAF04540.1	Os01g0256500, partial [Oryza sativa Japonica Group]
LOC_Os01g15290.MSUv7.0	749	705	745	710	779	630	41.3538	40.3101	39.9434	43.3172	41.2562	37.0056	EEE54261.1	hypothetical protein OsJ_01153 [Oryza sativa Japonica Group]
LOC_Os01g15300.MSUv7.0	183	220	248	219	258	232	2.72281	3.38984	3.58321	3.60062	3.68216	3.67238	XP_015623489.1	zinc finger CCCH domain-containing protein 4 [Oryza sativa Japonica Group]|Q1EHT7.1 RecName: Full=Zinc finger CCCH domain-containing protein 4; Short=OsC3H4|BAE95808.1 ATP-dependent RNA helicase A -like [Oryza sativa Japonica Group]|BAS71395.1 Os01g0256800 [Oryza sativa Japonica Group]
LOC_Os01g15310.MSUv7.0	501	507	532	496	512	547	26.2963	27.5585	27.1159	28.7678	25.7777	30.5448	KPP70182.1	Lsm4 protein-like [Scleropages formosus]
LOC_Os01g15320.MSUv7.0	403	318	497	260	77	212	28.5386	23.3209	34.1774	20.3455	5.23042	15.9719	XP_015633048.1	rapid alkalinization factor [Oryza sativa Japonica Group]|BAA85220.1 putative RALF precursor [Oryza sativa Japonica Group]|BAB07979.1 putative RALF precursor [Oryza sativa Japonica Group]|BAF04544.1 Os01g0257100 [Oryza sativa Japonica Group]|EAZ11299.1 hypothetical protein OsJ_01158 [Oryza sativa Japonica Group]|BAH01501.1 unnamed protein product [Oryza sativa Japonica Group]|BAS71398.1 Os01g0257…
LOC_Os01g15340.MSUv7.0	1379	1836	2960	1034	834	802	80.4857	110.973	167.765	66.6872	46.6915	49.7992	XP_015631985.1	flowering-promoting factor 1-like protein 1 [Oryza sativa Japonica Group]|Q9LGE3.1 RecName: Full=Flowering-promoting factor 1-like protein 1; AltName: Full=FPF1-like protein 1; AltName: Full=Protein ROOT ARCHITECTURE ASSOCIATED 1; Short=OsRAA1|BAB07982.1 FPF1 protein-like [Oryza sativa Japonica Group]|AAT94064.1 RAA1 [Oryza sativa Japonica Group]|BAF04545.1 Os01g0257300 [Oryza sativa Japonica Gro…
LOC_Os01g15350.MSUv7.0	815	843	996	553	789	720	18.2858	19.5873	21.7006	13.7104	16.9805	17.1863	EEC70342.1	hypothetical protein OsI_01241 [Oryza sativa Indica Group]
LOC_Os01g15390.MSUv7.0	135	117	199	59	104	83	5.99337	5.37916	8.57918	2.89439	4.42883	3.92021	BAD81396.1	unknown protein [Oryza sativa Japonica Group]|BAF04549.1 Os01g0258000 [Oryza sativa Japonica Group]|BAG98570.1 unnamed protein product [Oryza sativa Japonica Group]
LOC_Os01g15448.MSUv7.0	122	147	219	103	139	112	8.90568	11.1126	15.5241	8.30831	9.73285	8.69799	EEC80140.1	hypothetical protein OsI_21932 [Oryza sativa Indica Group]
LOC_Os01g15460.MSUv7.0	1380	1355	1815	1293	1365	1268	29.8447	30.3472	38.1172	30.8998	28.3165	29.1744	EAY73369.1	hypothetical protein OsI_01247 [Oryza sativa Indica Group]
LOC_Os01g15470.MSUv7.0	3709	3494	3147	2097	2156	2159	67.877	66.2185	55.9265	42.4065	37.8471	42.0351	XP_015651260.1	probable serine/threonine-protein kinase PBL7 isoform X1 [Oryza sativa Japonica Group]|BAD81406.1 putative protein kinase [Oryza sativa Japonica Group]|BAF04552.1 Os01g0259200 [Oryza sativa Japonica Group]|EEE54270.1 hypothetical protein OsJ_01169 [Oryza sativa Japonica Group]|BAS71410.1 Os01g0259200 [Oryza sativa Japonica Group]
LOC_Os01g15480.MSUv7.0	85	69	87	111	110	93	0.926048	0.778492	0.920426	1.3363	1.14954	1.07793	XP_015640333.1	serine/threonine-protein kinase RUNKEL [Oryza sativa Japonica Group]|BAD81407.1 putative FUSED serine/threonine kinase [Oryza sativa Japonica Group]|BAD81428.1 putative FUSED serine/threonine kinase [Oryza sativa Japonica Group]|BAF04553.1 Os01g0259400 [Oryza sativa Japonica Group]|BAS71412.1 Os01g0259400 [Oryza sativa Japonica Group]
LOC_Os01g15490.MSUv7.0	1186	1102	1141	977	1040	974	23.2385	22.3613	21.7103	21.1537	19.5468	20.3038	XP_015621933.1	FAD synthase [Oryza sativa Japonica Group]
LOC_Os01g15510.MSUv7.0	7	4	9	4	3	11	0.328686	0.194506	0.410375	0.207544	0.135121	0.549502	EAY73374.1	hypothetical protein OsI_01254 [Oryza sativa Indica Group]
LOC_Os01g15520.MSUv7.0	140	152	159	155	220	130	10.9562	12.3187	12.0833	13.4039	16.5148	10.8235	BAS71414.1	Os01g0259900, partial [Oryza sativa Japonica Group]
LOC_Os01g15530.MSUv7.0	35	31	33	15	24	22	0.885537	0.812252	0.810789	0.41937	0.582462	0.592181	XP_025880247.1	pentatricopeptide repeat-containing protein At5g56310-like [Oryza sativa Japonica Group]|BAD81434.1 pentatricopeptide (PPR) repeat-containing protein -like [Oryza sativa Japonica Group]
LOC_Os01g15540.MSUv7.0	191	194	221	68	106	113	4.17924	4.39599	4.69582	1.64415	2.22478	2.63049	EAZ11311.1	hypothetical protein OsJ_01175 [Oryza sativa Japonica Group]
LOC_Os01g15580.MSUv7.0	454	412	462	257	368	319	5.40488	5.07946	5.34106	3.38089	4.20238	4.04031	XP_025880238.1	putative disease resistance protein RGA1 [Oryza sativa Japonica Group]|BAB03441.1 NBS-LRR disease resistance protein -like [Oryza sativa Japonica Group]|BAF04558.1 Os01g0260500 [Oryza sativa Japonica Group]|EAZ11314.1 hypothetical protein OsJ_01178 [Oryza sativa Japonica Group]
LOC_Os01g15600.MSUv7.0	1164	1204	1394	1245	1263	1345	46.5244	49.8362	54.1061	54.9877	48.4227	57.1931	BAD81440.1	purine rich element binding protein B -like [Oryza sativa Japonica Group]
LOC_Os01g15610.MSUv7.0	2080	1885	2719	1546	1485	1193	380.386	356.996	482.865	312.42	260.498	232.111	XP_015649760.1	protein CASPARIAN STRIP INTEGRITY FACTOR 1 [Oryza sativa Japonica Group]|BAA92397.1 unknown protein [Oryza sativa Japonica Group]|BAB03444.1 unknown protein [Oryza sativa Japonica Group]|BAF04560.1 Os01g0260800 [Oryza sativa Japonica Group]|EAZ11316.1 hypothetical protein OsJ_01180 [Oryza sativa Japonica Group]|BAG92500.1 unnamed protein product [Oryza sativa Japonica Group]|BAS71421.1 Os01g02608…
LOC_Os01g15630.MSUv7.0	1920	1914	2184	1779	1955	1895	41.5749	42.9202	45.9238	42.567	40.6064	43.6548	XP_015649793.1	uncharacterized protein LOC4325119 isoform X1 [Oryza sativa Japonica Group]|BAD81235.1 C3H2C3 RING-finger protein -like [Oryza sativa Japonica Group]|BAD81441.1 C3H2C3 RING-finger protein -like [Oryza sativa Japonica Group]|BAF04561.1 Os01g0261100 [Oryza sativa Japonica Group]|BAG95516.1 unnamed protein product [Oryza sativa Japonica Group]|BAS71424.1 Os01g0261100 [Oryza sativa Japonica Group]
LOC_Os01g15640.MSUv7.0	3582	3564	3864	4284	3714	4886	93.1144	95.9444	97.5402	123.058	92.6086	135.126	XP_015649784.1	NAC domain-containing protein 74 [Oryza sativa Japonica Group]|Q7GCL7.1 RecName: Full=NAC domain-containing protein 74; Short=ONAC074; AltName: Full=OsNAC8|BAA89802.1 OsNAC8 protein [Oryza sativa]|BAA92400.1 putative NAM [Oryza sativa Japonica Group]|BAB03447.1 putative NAM [Oryza sativa Japonica Group]|BAF04562.1 Os01g0261200 [Oryza sativa Japonica Group]|BAG95726.1 unnamed protein product [Oryz…
LOC_Os01g15660.MSUv7.0	795	664	847	724	826	671	15.803	13.6688	16.3498	15.903	15.7497	14.1902	BAD81237.1	unknown protein [Oryza sativa Japonica Group]|BAD81443.1 unknown protein [Oryza sativa Japonica Group]
LOC_Os01g15720.MSUv7.0	0	0	0	0	1	0	0	0	0	0	0.0176535	0	FAA01221.1	TPA: polyprotein [Oryza sativa Japonica Group]
LOC_Os01g15770.MSUv7.0	5	5	14	22	12	9	0.228798	0.236942	0.622107	1.11243	0.526722	0.438145	XP_015617982.1	transmembrane protein 136 [Oryza sativa Japonica Group]
LOC_Os01g15780.MSUv7.0	435	463	521	388	489	343	8.91556	9.82723	10.3694	8.78737	9.6136	7.47906	XP_015617928.1	uncharacterized protein LOC4325125 isoform X1 [Oryza sativa Japonica Group]|BAD81244.1 unknown protein [Oryza sativa Japonica Group]|BAF04567.1 Os01g0262600 [Oryza sativa Japonica Group]|EAZ11326.1 hypothetical protein OsJ_01190 [Oryza sativa Japonica Group]|BAS71435.1 Os01g0262600 [Oryza sativa Japonica Group]
LOC_Os01g15790.MSUv7.0	138	100	131	73	51	51	2.98447	2.23965	2.75116	1.74453	1.05798	1.17342	XP_025880278.1	uncharacterized protein LOC4325126 isoform X1 [Oryza sativa Japonica Group]
LOC_Os01g15810.MSUv7.0	224	99	89	104	38	69	8.6545	3.96113	3.33917	4.44012	1.4083	2.8362	XP_015633099.1	peroxidase 9 [Oryza sativa Japonica Group]|BAA92422.1 putative PRX [Oryza sativa Japonica Group]|BAA92497.1 putative PRX [Oryza sativa Japonica Group]|CAH69248.1 TPA: class III peroxidase 5 precursor [Oryza sativa Japonica Group]|BAF04569.1 Os01g0263000 [Oryza sativa Japonica Group]|EAY73395.1 hypothetical protein OsI_01276 [Oryza sativa Indica Group]|EAZ11329.1 hypothetical protein OsJ_01193 [Or…
LOC_Os01g15830.MSUv7.0	1915	2821	2528	1477	1815	1421	66.4957	101.442	85.2427	56.6726	60.4532	52.4944	EAY73397.1	hypothetical protein OsI_01277 [Oryza sativa Indica Group]
LOC_Os01g15840.MSUv7.0	111	124	108	57	86	71	1.5293	1.76922	1.44494	0.867785	1.13654	1.04069	BAD81247.1	fertility restorer -like [Oryza sativa Japonica Group]|BAS71441.1 Os01g0263400 [Oryza sativa Japonica Group]
LOC_Os01g15850.MSUv7.0	235	230	305	224	241	244	7.85647	7.96303	9.90181	8.27514	7.72849	8.67847	XP_015621632.1	mediator of RNA polymerase II transcription subunit 27 [Oryza sativa Japonica Group]|EEC70356.1 hypothetical protein OsI_01279 [Oryza sativa Indica Group]|EEE54283.1 hypothetical protein OsJ_01196 [Oryza sativa Japonica Group]|BAS71442.1 Os01g0263500 [Oryza sativa Japonica Group]
LOC_Os01g15860.MSUv7.0	307	201	292	296	263	230	5.02225	3.40523	4.63872	5.35081	4.12699	4.00296	BAS71443.1	Os01g0263600 [Oryza sativa Japonica Group]
LOC_Os01g15900.MSUv7.0	153	143	127	337	361	203	3.57917	3.46431	2.88502	8.71141	8.10057	5.0522	XP_015618265.1	cyclic dof factor 2 [Oryza sativa Japonica Group]
LOC_Os01g15910.MSUv7.0	93	96	118	130	146	104	2.14287	2.29074	2.64028	3.30997	3.22689	2.54941	BAD81252.1	putative UDP-glucose pyrophosphorylase [Oryza sativa Japonica Group]
LOC_Os01g15920.MSUv7.0	35	46	65	39	43	50	8.81259	11.9945	15.8929	10.851	10.3854	13.3936	BAD81253.1	hypothetical protein [Oryza sativa Japonica Group]|EEC70360.1 hypothetical protein OsI_01284 [Oryza sativa Indica Group]|EEE54286.1 hypothetical protein OsJ_01202 [Oryza sativa Japonica Group]|BAS71449.1 Os01g0264150 [Oryza sativa Japonica Group]
LOC_Os01g15934.MSUv7.0	1	6	1	1	2	0	0.0313599	0.194857	0.030453	0.0346531	0.060162	0	AAX96117.1	retrotransposon protein, putative, Ty3-gypsy sub-class [Oryza sativa Japonica Group]|ABA92916.1 retrotransposon, putative, centromere-specific [Oryza sativa Japonica Group]
LOC_Os01g15950.MSUv7.0	0	0	2	0	0	0	0	0	0.36676	0	0	0	EAY73404.1	hypothetical protein OsI_01286 [Oryza sativa Indica Group]|BAS71450.1 Os01g0264200 [Oryza sativa Japonica Group]
LOC_Os01g15970.MSUv7.0	158	180	235	150	100	115	8.96081	10.5719	12.9424	9.40047	5.44011	6.93876	BAS77373.1	Os02g0188201 [Oryza sativa Japonica Group]
LOC_Os01g15979.MSUv7.0	604	611	684	566	610	606	37.0796	38.8445	40.7764	38.3957	35.9208	39.5789	XP_015623295.1	uncharacterized protein LOC4326203 [Oryza sativa Japonica Group]|BAA90342.1 unknown protein [Oryza sativa Japonica Group]|BAA92514.1 unknown protein [Oryza sativa Japonica Group]|BAF04578.1 Os01g0264500 [Oryza sativa Japonica Group]|BAG88349.1 unnamed protein product [Oryza sativa Japonica Group]|EEC70361.1 hypothetical protein OsI_01289 [Oryza sativa Indica Group]|EEE54288.1 hypothetical protein…
LOC_Os01g15990.MSUv7.0	1	4	2	2	1	1	0.0247367	0.102469	0.0480426	0.0546687	0.0237279	0.0263169	XP_015643735.1	protein PHYTOCHROME KINASE SUBSTRATE 4 [Oryza sativa Japonica Group]|BAA90343.1 hypothetical protein [Oryza sativa Japonica Group]|BAA92515.1 hypothetical protein [Oryza sativa Japonica Group]|BAH91001.1 Os01g0264600 [Oryza sativa Japonica Group]|BAS71453.1 Os01g0264600 [Oryza sativa Japonica Group]
LOC_Os01g16000.MSUv7.0	737	720	887	548	476	477	17.9247	18.1345	20.949	14.7276	11.1047	12.3423	EAY73408.1	hypothetical protein OsI_01291 [Oryza sativa Indica Group]|EAZ11341.1 hypothetical protein OsJ_01209 [Oryza sativa Japonica Group]
LOC_Os01g16010.MSUv7.0	485	461	572	549	548	402	19.795	19.4853	22.6708	24.7603	21.4542	17.4556	BAD81183.1	hypothetical protein [Oryza sativa Japonica Group]|BAD81257.1 hypothetical protein [Oryza sativa Japonica Group]
LOC_Os01g16020.MSUv7.0	37	30	55	52	39	52	1.19113	1.00016	1.7194	1.84982	1.20432	1.78097	XP_015611288.1	uncharacterized protein LOC4326207 [Oryza sativa Japonica Group]|BAD81184.1 putative geranylgeranyl hydrogenase [Oryza sativa Japonica Group]|BAD81258.1 putative geranylgeranyl hydrogenase [Oryza sativa Japonica Group]|BAF04581.1 Os01g0265000 [Oryza sativa Japonica Group]|BAS71455.1 Os01g0265000 [Oryza sativa Japonica Group]
LOC_Os01g16030.MSUv7.0	132	127	247	130	17	65	4.39608	4.38012	7.9881	4.78413	0.543073	2.30302	RQM14326.1	hypothetical protein DD237_003717 [Peronospora effusa]
LOC_Os01g16040.MSUv7.0	687	903	1320	529	580	524	17.6474	24.0216	32.9271	15.0158	14.2912	14.3202	EEC70364.1	hypothetical protein OsI_01295 [Oryza sativa Indica Group]
LOC_Os01g16060.MSUv7.0	178	140	154	74	173	132	2.98789	2.43368	2.51027	1.3726	2.78553	2.35728	BAG95352.1	unnamed protein product [Oryza sativa Japonica Group]|BAH00054.1 unnamed protein product [Oryza sativa Japonica Group]
LOC_Os01g16070.MSUv7.0	52	37	34	17	44	37	7.40505	5.45654	4.70174	2.67511	6.01029	5.60557	EEC70365.1	hypothetical protein OsI_01297 [Oryza sativa Indica Group]|EEE54290.1 hypothetical protein OsJ_01213 [Oryza sativa Japonica Group]
LOC_Os01g16080.MSUv7.0	191	245	312	216	212	194	7.99594	10.6217	12.6837	9.99213	8.51315	8.64036	XP_015626767.1	uncharacterized protein LOC4326211 [Oryza sativa Japonica Group]|BAD81185.1 unknown protein [Oryza sativa Japonica Group]|BAF04585.1 Os01g0265700 [Oryza sativa Japonica Group]|EAY73416.1 hypothetical protein OsI_01298 [Oryza sativa Indica Group]|BAG99188.1 unnamed protein product [Oryza sativa Japonica Group]|BAS71461.1 Os01g0265700 [Oryza sativa Japonica Group]
LOC_Os01g16090.MSUv7.0	884	869	1066	896	968	1116	24.3136	24.7518	28.4714	27.2316	25.5382	32.6553	BAF04586.2	Os01g0265800, partial [Oryza sativa Japonica Group]
LOC_Os01g16100.MSUv7.0	159	162	198	149	140	116	5.56555	5.87241	6.73025	5.76322	4.70064	4.31979	AQK89412.1	Translin family protein [Zea mays]
LOC_Os01g16110.MSUv7.0	1511	1436	1609	1201	1598	1545	22.8935	22.5316	23.6733	20.1075	23.2243	24.904	EEC70367.1	hypothetical protein OsI_01301 [Oryza sativa Indica Group]
LOC_Os01g16120.MSUv7.0	92	49	74	53	52	42	4.68267	2.58281	3.65757	2.98091	2.53879	2.2743	XP_015642452.1	E3 ubiquitin-protein ligase EL5-like [Oryza sativa Japonica Group]|BAA90357.1 unknown protein [Oryza sativa Japonica Group]|BAF04589.1 Os01g0266100 [Oryza sativa Japonica Group]|EAY73420.1 hypothetical protein OsI_01302 [Oryza sativa Indica Group]|BAG88608.1 unnamed protein product [Oryza sativa Japonica Group]|BAS71465.1 Os01g0266100 [Oryza sativa Japonica Group]
LOC_Os01g16130.MSUv7.0	0	0	0	0	3	0	0	0	0	0	0.0739931	0	BAF04591.1	Os01g0266300, partial [Oryza sativa Japonica Group]
LOC_Os01g16140.MSUv7.0	24	10	26	17	25	11	4.96382	2.14188	5.22196	3.88528	4.95979	2.42042	XP_015621285.1	uncharacterized protein LOC4324374 [Oryza sativa Japonica Group]|BAD81133.1 unknown protein [Oryza sativa Japonica Group]|BAD81190.1 unknown protein [Oryza sativa Japonica Group]|EAY73428.1 hypothetical protein OsI_01308 [Oryza sativa Indica Group]|EAZ11352.1 hypothetical protein OsJ_01219 [Oryza sativa Japonica Group]|BAH00357.1 unnamed protein product [Oryza sativa Japonica Group]|BAF04592.2 Os…
LOC_Os01g16146.MSUv7.0	785	1012	2098	328	401	834	35.2103	47.0079	91.3819	16.257	17.2529	39.7978	XP_025880346.1	uncharacterized protein LOC4324375 isoform X3 [Oryza sativa Japonica Group]
LOC_Os01g16152.MSUv7.0	471	461	562	286	242	243	20.4913	20.7702	23.7433	13.7494	10.0991	11.2473	XP_015621284.1	peroxiredoxin-2F, mitochondrial [Oryza sativa Japonica Group]|Q9SDD6.1 RecName: Full=Peroxiredoxin-2F, mitochondrial; AltName: Full=Peroxiredoxin IIF; AltName: Full=Thioredoxin peroxidase 2F; Flags: Precursor|BAA88530.1 putative thioredoxin peroxidase [Oryza sativa Japonica Group]|BAA90363.1 putative thioredoxin peroxidase [Oryza sativa Japonica Group]|BAF04594.1 Os01g0266600 [Oryza sativa Japoni…
LOC_Os01g16170.MSUv7.0	1200	1237	541	2247	2128	2327	24.829	26.5056	10.87	51.3746	42.2345	51.2233	XP_015621729.1	uncharacterized protein LOC4324377 isoform X1 [Oryza sativa Japonica Group]|BAD81134.1 unknown protein [Oryza sativa Japonica Group]|BAF04595.1 Os01g0266800 [Oryza sativa Japonica Group]|BAG91453.1 unnamed protein product [Oryza sativa Japonica Group]|BAS71470.1 Os01g0266800 [Oryza sativa Japonica Group]
LOC_Os01g16180.MSUv7.0	1146	1206	1154	1094	1479	1111	11.8253	12.8874	11.5635	12.4742	14.6391	12.1965	XP_015619371.1	methyltransferase-like protein 1 [Oryza sativa Japonica Group]|XP_015619381.1 methyltransferase-like protein 1 [Oryza sativa Japonica Group]|BAF04596.1 Os01g0267100 [Oryza sativa Japonica Group]|BAG89330.1 unnamed protein product [Oryza sativa Japonica Group]|BAS71472.1 Os01g0267100 [Oryza sativa Japonica Group]
LOC_Os01g16190.MSUv7.0	1597	1625	1662	1577	1450	1486	62.1627	65.5042	62.822	67.8305	54.1391	61.5372	RWW06273.1	hypothetical protein GW17_00030413 [Ensete ventricosum]
LOC_Os01g16200.MSUv7.0	71	69	122	242	129	170	2.90922	2.92791	4.85438	10.9573	5.07021	7.41073	Q5NBM0.1	RecName: Full=Putative serpin-Z12; AltName: Full=OrysaZ12|BAD81136.1 putative serpin [Oryza sativa Japonica Group]
LOC_Os01g16210.MSUv7.0	552	366	522	411	424	288	21.5347	14.7867	19.7754	17.7178	15.8666	11.9532	BAF04599.2	Os01g0267400 [Oryza sativa Japonica Group]
LOC_Os01g16220.MSUv7.0	83	103	132	114	83	83	2.55521	3.2838	3.94619	3.87812	2.45101	2.71844	XP_015627709.1	SUN domain-containing protein 1 [Oryza sativa Japonica Group]|BAD81138.1 unc-84 homolog B -like [Oryza sativa Japonica Group]|BAF04600.1 Os01g0267600 [Oryza sativa Japonica Group]|EAZ11359.1 hypothetical protein OsJ_01226 [Oryza sativa Japonica Group]|BAS71476.1 Os01g0267600 [Oryza sativa Japonica Group]
LOC_Os01g16230.MSUv7.0	91	90	117	88	56	77	3.98231	4.07875	4.97205	4.25544	2.35071	3.58491	XP_015633001.1	serine/threonine-protein kinase-like protein At5g23170 [Oryza sativa Japonica Group]|BAF04601.2 Os01g0267800 [Oryza sativa Japonica Group]|BAS71477.1 Os01g0267800 [Oryza sativa Japonica Group]
LOC_Os01g16240.MSUv7.0	2190	2588	2712	2843	2598	2452	140.917	172.455	169.459	202.146	160.353	167.855	TEY85619.1	calmodulin [Salvia splendens]
LOC_Os01g16250.MSUv7.0	0	1	0	0	0	1	0	0.0713961	0	0	0	0.0733462	BAF04603.1	Os01g0268000 [Oryza sativa Japonica Group]|BAS71479.1 Os01g0268000 [Oryza sativa Japonica Group]
LOC_Os01g16260.MSUv7.0	740	781	891	642	794	926	16.9162	18.489	19.779	16.2171	17.4104	22.5204	EEE54296.1	hypothetical protein OsJ_01228 [Oryza sativa Japonica Group]
LOC_Os01g16290.MSUv7.0	571	549	581	474	787	569	9.54171	9.50065	9.42805	8.75259	12.6149	10.1157	XP_015622284.1	DNA gyrase subunit B, chloroplastic/mitochondrial [Oryza sativa Japonica Group]|Q5NBJ3.1 RecName: Full=DNA gyrase subunit B, chloroplastic/mitochondrial; Flags: Precursor|BAD81142.1 putative DNA gyrase B subunit [Oryza sativa Japonica Group]|BAD81163.1 putative DNA gyrase B subunit [Oryza sativa Japonica Group]|BAF04605.1 Os01g0268300 [Oryza sativa Japonica Group]|BAS71481.1 Os01g0268300 [Oryza s…
LOC_Os01g16310.MSUv7.0	83	96	91	119	75	227	1.39054	1.66559	1.48048	2.20303	1.20527	4.04599	XP_015627238.1	uncharacterized protein LOC4326262 isoform X1 [Oryza sativa Japonica Group]|BAD81144.1 alpha-glucosidase -like [Oryza sativa Japonica Group]|BAD81165.1 alpha-glucosidase -like [Oryza sativa Japonica Group]|BAF04606.2 Os01g0268500 [Oryza sativa Japonica Group]|BAS71483.1 Os01g0268600 [Oryza sativa Japonica Group]
LOC_Os01g16330.MSUv7.0	668	752	617	636	618	615	21.0243	24.5106	18.8576	22.1192	18.6574	20.5927	XP_015616986.1	rhomboid-like protein 20 [Oryza sativa Japonica Group]|BAA88548.1 unknown protein [Oryza sativa Japonica Group]|BAA89569.1 unknown protein [Oryza sativa Japonica Group]|BAF04608.1 Os01g0268800 [Oryza sativa Japonica Group]|BAG93409.1 unnamed protein product [Oryza sativa Japonica Group]|BAG97406.1 unnamed protein product [Oryza sativa Japonica Group]|BAS71487.1 Os01g0268800 [Oryza sativa Japonica…
LOC_Os01g16340.MSUv7.0	83	70	124	90	106	74	3.593	3.13811	5.21262	4.30516	4.40152	3.40804	XP_015616999.1	Holliday junction resolvase MOC1, chloroplastic [Oryza sativa Japonica Group]|BAD81146.1 unknown protein [Oryza sativa Japonica Group]|BAD81167.1 unknown protein [Oryza sativa Japonica Group]|BAF04609.1 Os01g0268900 [Oryza sativa Japonica Group]|EEE54299.1 hypothetical protein OsJ_01234 [Oryza sativa Japonica Group]|BAS71488.1 Os01g0268900 [Oryza sativa Japonica Group]
LOC_Os01g16350.MSUv7.0	843	861	753	1511	1611	1982	24.67	26.0937	21.3989	48.8623	45.2226	61.7076	XP_015616974.1	hydroxymethylglutaryl-CoA lyase, mitochondrial [Oryza sativa Japonica Group]|BAF04610.1 Os01g0269000 [Oryza sativa Japonica Group]|EEE54300.1 hypothetical protein OsJ_01235 [Oryza sativa Japonica Group]|BAS71489.1 Os01g0269000 [Oryza sativa Japonica Group]
LOC_Os01g16354.MSUv7.0	1026	858	993	830	858	727	23.6198	20.4554	22.199	21.1142	18.9467	17.8056	XP_015622471.1	rab escort protein 1 [Oryza sativa Japonica Group]
LOC_Os01g16370.MSUv7.0	44	37	53	49	64	59	0.663951	0.578197	0.776631	0.817048	0.926363	0.947172	EEC70383.1	hypothetical protein OsI_01331 [Oryza sativa Indica Group]
LOC_Os01g16380.MSUv7.0	22	15	12	21	32	23	1.17604	0.830392	0.622928	1.24048	1.64085	1.30804	EEC70384.1	hypothetical protein OsI_01332 [Oryza sativa Indica Group]
LOC_Os01g16390.MSUv7.0	7	2	6	2	5	0	0.121735	0.0360197	0.101327	0.0384341	0.0834078	0	BAS71495.1	Os01g0269700 [Oryza sativa Japonica Group]
LOC_Os01g16400.MSUv7.0	43	28	105	39	11	25	0.738197	0.497797	1.75045	0.739838	0.18114	0.456602	XP_015622328.1	disease resistance protein Pik-2-like [Oryza sativa Japonica Group]|BAA89580.1 NBS-LRR disease resistance protein -like [Oryza sativa Japonica Group]|BAF04613.1 Os01g0269800 [Oryza sativa Japonica Group]|EAZ11375.1 hypothetical protein OsJ_01240 [Oryza sativa Japonica Group]
LOC_Os01g16414.MSUv7.0	436	405	539	287	376	352	9.7279	9.3579	11.6782	7.07592	8.04708	8.35544	XP_015622329.1	actin-related protein 6 [Oryza sativa Japonica Group]|XP_015622330.1 actin-related protein 6 [Oryza sativa Japonica Group]|XP_015622331.1 actin-related protein 6 [Oryza sativa Japonica Group]|XP_015622333.1 actin-related protein 6 [Oryza sativa Japonica Group]|XP_015622334.1 actin-related protein 6 [Oryza sativa Japonica Group]|Q5NBI2.1 RecName: Full=Actin-related protein 6|A2WNB0.1 RecName: Full…
LOC_Os01g16430.MSUv7.0	1365	1438	1802	1412	1397	1761	56.8243	61.9942	72.847	64.9537	55.7848	77.9928	XP_015621945.1	cysteine proteinase inhibitor 12 [Oryza sativa Japonica Group]|Q0JNR2.1 RecName: Full=Cysteine proteinase inhibitor 12; AltName: Full=Oryzacystatin XII; Short=OC-XII; AltName: Full=Oryzacystatin-12; Flags: Precursor|BAF04616.1 Os01g0270100 [Oryza sativa Japonica Group]|BAG99665.1 unnamed protein product [Oryza sativa Japonica Group]|BAS71500.1 Os01g0270100 [Oryza sativa Japonica Group]
LOC_Os01g16450.MSUv7.0	548	388	592	567	802	659	17.0112	12.4732	17.8456	19.4494	23.8807	21.7638	XP_015622358.1	peroxidase 24 [Oryza sativa Japonica Group]|BAA89584.1 putative cationic peroxidase isozyme 40K precursor [Oryza sativa Japonica Group]|BAA90365.1 putative cationic peroxidase isozyme 40K precursor [Oryza sativa Japonica Group]|CAH69247.1 TPA: class III peroxidase 4 precursor [Oryza sativa Japonica Group]|BAF04617.1 Os01g0270300 [Oryza sativa Japonica Group]|EAY73461.1 hypothetical protein OsI_01…
LOC_Os01g16460.MSUv7.0	16	36	25	25	33	33	1.03336	2.40783	1.56793	1.78419	2.04439	2.26746	BAD81178.1	hypothetical protein [Oryza sativa Japonica Group]|BAD81193.1 hypothetical protein [Oryza sativa Japonica Group]
LOC_Os01g16510.MSUv7.0	299	303	416	243	353	283	12.9758	13.6175	17.5312	11.653	14.6945	13.066	XP_015651482.1	uncharacterized protein LOC4325165 isoform X1 [Oryza sativa Japonica Group]
LOC_Os01g16520.MSUv7.0	496	476	448	393	480	559	10.3738	10.3099	9.09894	9.08277	9.62979	12.4384	XP_015651457.1	glutamate--tRNA ligase, cytoplasmic [Oryza sativa Japonica Group]|BAA90375.1 putative multifunctional amino acid-tRNA ligase [Oryza sativa Japonica Group]|BAF04620.1 Os01g0271200 [Oryza sativa Japonica Group]|EAY73464.1 hypothetical protein OsI_01343 [Oryza sativa Indica Group]|EAZ11382.1 hypothetical protein OsJ_01247 [Oryza sativa Japonica Group]|BAS71506.1 Os01g0271200 [Oryza sativa Japonica G…
LOC_Os01g16530.MSUv7.0	378	382	519	432	532	324	15.308	16.0207	20.4103	19.3321	20.666	13.9594	BAD81195.1	putative ATP-dependent Clp protease proteolytic subunit [Oryza sativa Japonica Group]|EAZ11383.1 hypothetical protein OsJ_01248 [Oryza sativa Japonica Group]
LOC_Os01g16540.MSUv7.0	1098	1067	1153	884	958	872	32.2957	32.501	32.9326	28.7318	27.0287	27.2868	XP_015610620.1	NEDD8-activating enzyme E1 catalytic subunit [Oryza sativa Japonica Group]|BAD81196.1 putative UBA3 [Oryza sativa Japonica Group]|BAF04622.1 Os01g0271500 [Oryza sativa Japonica Group]|EEC70388.1 hypothetical protein OsI_01345 [Oryza sativa Indica Group]|EEE54306.1 hypothetical protein OsJ_01249 [Oryza sativa Japonica Group]|BAS71508.1 Os01g0271500 [Oryza sativa Japonica Group]
LOC_Os01g16550.MSUv7.0	217	273	358	251	237	220	43.3336	56.4571	69.423	55.3869	45.3974	46.7392	BAH91004.1	Os01g0271700 [Oryza sativa Japonica Group]
LOC_Os01g16600.MSUv7.0	261	334	264	188	173	176	8.40752	11.142	8.25822	6.69195	5.34553	6.03161	XP_015627955.1	hydroxyproline O-arabinosyltransferase 3 [Oryza sativa Japonica Group]|BAD81201.1 unknown protein [Oryza sativa Japonica Group]|BAF04624.1 Os01g0272600 [Oryza sativa Japonica Group]|BAG90597.1 unnamed protein product [Oryza sativa Japonica Group]|BAS71511.1 Os01g0272600 [Oryza sativa Japonica Group]
LOC_Os01g16610.MSUv7.0	1	0	0	0	1	0	0.077215	0	0	0	0.0740662	0	XP_015637293.2	early nodulin-like protein 1 [Oryza sativa Japonica Group]|BAD81202.1 putative NtEPc-like protein [Oryza sativa Japonica Group]|BAS71513.1 Os01g0272700 [Oryza sativa Japonica Group]
LOC_Os01g16620.MSUv7.0	383	426	418	300	343	310	11.1457	12.8384	11.8125	9.64716	9.57463	9.59766	BAA90389.1	hypothetical protein [Oryza sativa Japonica Group]
LOC_Os01g16640.MSUv7.0	360	380	459	311	299	307	81.2262	88.7908	100.568	77.5393	64.7117	73.6929	BAA90391.1	hypothetical protein [Oryza sativa Japonica Group]
LOC_Os01g16650.MSUv7.0	38	47	60	60	25	42	2.23037	2.85681	3.41979	3.89145	1.40751	2.62262	XP_015633764.1	probable ubiquitin-conjugating enzyme E2 C [Oryza sativa Japonica Group]|BAA90392.1 putative cyclin-selective ubiquitin carrier protein E2-C [Oryza sativa Japonica Group]|BAF04627.1 Os01g0273100 [Oryza sativa Japonica Group]|EAZ11392.1 hypothetical protein OsJ_01256 [Oryza sativa Japonica Group]|BAG97193.1 unnamed protein product [Oryza sativa Japonica Group]|BAS71518.1 Os01g0273100 [Oryza sativa…
LOC_Os01g16660.MSUv7.0	8	10	6	0	0	7	0.184578	0.238935	0.13443	0	0	0.171823	PVH31302.1	hypothetical protein PAHAL_9G107200 [Panicum hallii]
LOC_Os01g16670.MSUv7.0	764	726	700	614	532	610	20.4414	20.1161	18.1874	18.1532	13.6536	17.3636	XP_015633334.1	BSD domain-containing protein 1 [Oryza sativa Japonica Group]|BAD81206.1 hypothetical protein [Oryza sativa Japonica Group]|BAF04628.1 Os01g0273300 [Oryza sativa Japonica Group]|BAS71522.1 Os01g0273300 [Oryza sativa Japonica Group]
LOC_Os01g16714.MSUv7.0	52	47	72	66	63	43	1.95827	1.83298	2.63304	2.74651	2.27577	1.72279	EAY73480.1	hypothetical protein OsI_01359 [Oryza sativa Indica Group]
LOC_Os01g16730.MSUv7.0	0	9	0	0	0	0	0	0.14048	0	0	0	0	BAD81124.1	hypothetical protein [Oryza sativa Japonica Group]
LOC_Os01g16770.MSUv7.0	19	12	31	19	7	53	1.24096	0.811661	1.96616	1.37127	0.43855	3.68275	AAY63997.1	alpha-expansin 11, partial [Oryza sativa Japonica Group]
LOC_Os01g16810.MSUv7.0	224	567	206	177	83	188	7.04581	18.4696	6.29225	6.15211	2.50426	6.29122	XP_015631112.1	transcription factor CSA-like [Oryza sativa Japonica Group]|Q5NBM8.2 RecName: Full=Transcription factor CSA; AltName: Full=Myb-related protein CSA; AltName: Full=Protein CARBON STARVED ANTHER
LOC_Os01g16840.MSUv7.0	0	0	0	3	0	0	0	0	0	0.172436	0	0	BAA88173.1	hypothetical protein [Oryza sativa Japonica Group]|BAA88209.1 hypothetical protein [Oryza sativa Japonica Group]
LOC_Os01g16860.MSUv7.0	11	2	0	8	19	18	0.214486	0.0403857	0	0.172371	0.355368	0.373399	Q5NBN9.2	RecName: Full=Protein argonaute 15; Short=OsAGO15
LOC_Os01g16870.MSUv7.0	1097	1017	1395	950	1576	1159	18.2495	17.5209	22.5359	17.4637	25.1489	20.5127	XP_015621073.1	protein argonaute 4A [Oryza sativa Japonica Group]|XP_015621074.1 protein argonaute 4A [Oryza sativa Japonica Group]|Q9SDG8.1 RecName: Full=Protein argonaute 4A; Short=OsAGO4a|BAA88176.1 putative zwille protein [Oryza sativa Japonica Group]|BAF04636.1 Os01g0275600 [Oryza sativa Japonica Group]|BAS71541.1 Os01g0275600 [Oryza sativa Japonica Group]
LOC_Os01g16890.MSUv7.0	2580	2688	3250	2706	2629	2135	104.646	112.907	128.009	121.283	102.285	92.1285	XP_015638739.1	60S ribosomal protein L30 [Oryza sativa Japonica Group]|AAT69635.1 putative 60S ribosomal protein L30 [Oryza sativa Japonica Group]|AAT77294.1 putative 60S ribosomal protein L30 [Oryza sativa Japonica Group]|BAF17811.1 Os05g0490100 [Oryza sativa Japonica Group]|BAH00257.1 unnamed protein product [Oryza sativa Japonica Group]|EEE64184.1 hypothetical protein OsJ_19016 [Oryza sativa Japonica Group]|…
LOC_Os01g16900.MSUv7.0	1522	1754	1649	1406	1353	1457	42.8562	51.1469	45.0895	43.7474	36.5439	43.6468	XP_015611169.1	isocitrate dehydrogenase [NAD] catalytic subunit 5, mitochondrial [Oryza sativa Japonica Group]|BAA88179.1 putative isocitrate dehydrogenase [Oryza sativa Japonica Group]|BAE48299.1 NAD-dependent isocitrate dehydrogenase a [Oryza sativa Japonica Group]|BAF04639.1 Os01g0276100 [Oryza sativa Japonica Group]|EAZ11416.1 hypothetical protein OsJ_01284 [Oryza sativa Japonica Group]|BAG87045.1 unnamed p…
LOC_Os01g16910.MSUv7.0	424	483	693	340	380	384	15.8075	18.6482	25.0892	14.007	13.5894	15.2308	BAD81111.1	mitochondrial import receptor subunit tom40 -like [Oryza sativa Japonica Group]
LOC_Os01g16920.MSUv7.0	0	0	3	0	0	0	0	0	0.157183	0	0	0	XP_015611186.1	embryonic protein DC-8 [Oryza sativa Japonica Group]|BAD81113.1 putative embryonic abundant protein, group 3 [Oryza sativa Japonica Group]|BAF04641.1 Os01g0276300 [Oryza sativa Japonica Group]|EAY73495.1 hypothetical protein OsI_01378 [Oryza sativa Indica Group]|BAG98306.1 unnamed protein product [Oryza sativa Japonica Group]|BAS71549.1 Os01g0276300 [Oryza sativa Japonica Group]
LOC_Os01g16930.MSUv7.0	219	210	233	214	230	258	7.11172	7.06221	7.34754	7.67914	7.16434	8.91341	BAD81114.1	putative presenilin [Oryza sativa Japonica Group]
LOC_Os01g16940.MSUv7.0	477	429	594	384	430	318	20.1796	18.795	24.4026	17.9512	17.4494	14.3125	XP_015611206.1	histidine biosynthesis bifunctional protein hisIE, chloroplastic [Oryza sativa Japonica Group]|BAD81115.1 putative phosphoribosyl-ATP pyrophosphohydrolase At-IE [Oryza sativa Japonica Group]|BAF04643.1 Os01g0276500 [Oryza sativa Japonica Group]|EAY73498.1 hypothetical protein OsI_01380 [Oryza sativa Indica Group]|EAZ11420.1 hypothetical protein OsJ_01288 [Oryza sativa Japonica Group]|BAG87669.1 u…
LOC_Os01g16950.MSUv7.0	341	274	448	399	363	233	11.6468	9.69153	14.8588	15.0589	11.8926	8.46644	XP_015619754.1	E3 ubiquitin-protein ligase SIRP1-like [Oryza sativa Japonica Group]|BAA88184.1 zinc finger protein -like [Oryza sativa Japonica Group]|BAF04644.1 Os01g0276600 [Oryza sativa Japonica Group]|BAS71552.1 Os01g0276600 [Oryza sativa Japonica Group]
LOC_Os01g16960.MSUv7.0	768	942	736	658	755	712	16.3715	20.7955	15.2356	15.4996	15.438	16.1473	XP_015619741.1	pyruvate kinase, cytosolic isozyme [Oryza sativa Japonica Group]|BAD81116.1 putative pyruvate kinase, cytosolic isozyme [Oryza sativa Japonica Group]|BAF04645.1 Os01g0276700 [Oryza sativa Japonica Group]|BAG95929.1 unnamed protein product [Oryza sativa Japonica Group]|EEE54322.1 hypothetical protein OsJ_01290 [Oryza sativa Japonica Group]|BAS71553.1 Os01g0276700 [Oryza sativa Japonica Group]
LOC_Os01g16970.MSUv7.0	2363	2391	2680	2084	2382	2058	49.5215	51.892	54.5406	48.2609	47.8839	45.8848	XP_015621560.1	glucosidase 2 subunit beta isoform X1 [Oryza sativa Japonica Group]|Q5NBP9.1 RecName: Full=Glucosidase 2 subunit beta; AltName: Full=Glucosidase II subunit beta; Flags: Precursor|BAD81117.1 protein kinase C substrate 80K-H isoform 2 -like [Oryza sativa Japonica Group]|BAF04646.1 Os01g0276800 [Oryza sativa Japonica Group]|BAG95785.1 unnamed protein product [Oryza sativa Japonica Group]|BAS71556.1 …
LOC_Os01g16980.MSUv7.0	59	211	32	21	0	13	4.31895	15.9955	2.27474	1.69869	0	1.01242	EAY73502.1	hypothetical protein OsI_01384 [Oryza sativa Indica Group]
LOC_Os01g16990.MSUv7.0	5	6	11	5	9	6	0.476418	0.592053	1.01781	0.526449	0.822581	0.608223	BAD81119.1	unknown protein [Oryza sativa Japonica Group]|BAF04648.1 Os01g0277100 [Oryza sativa Japonica Group]|BAG88514.1 unnamed protein product [Oryza sativa Japonica Group]|BAS71562.1 Os01g0277100 [Oryza sativa Japonica Group]
LOC_Os01g17000.MSUv7.0	128	77	189	88	75	64	2.95717	1.84225	4.24017	2.24656	1.66206	1.57304	XP_015635234.1	cyclic dof factor 2 [Oryza sativa Japonica Group]|BAD81122.1 ascorbate oxidase promoter-binding protein AOBP -like [Oryza sativa Japonica Group]|BAF04649.1 Os01g0277500 [Oryza sativa Japonica Group]
LOC_Os01g17010.MSUv7.0	724	622	681	601	792	763	10.1766	9.05414	9.29541	9.33487	10.6785	11.41	BAF04650.2	Os01g0277600 [Oryza sativa Japonica Group]
LOC_Os01g17020.MSUv7.0	569	461	615	506	458	374	24.5703	20.6153	25.7887	24.1444	18.9706	17.1816	NP_001140751.1	uncharacterized protein LOC100272826 [Zea mays]|ACF84539.1 unknown [Zea mays]
LOC_Os01g17030.MSUv7.0	1	1	0	0	0	0	0.115056	0.119151	0	0	0	0	BAD81148.1	hypothetical protein [Oryza sativa Japonica Group]|EAY73506.1 hypothetical protein OsI_01388 [Oryza sativa Indica Group]
LOC_Os01g17040.MSUv7.0	86	66	62	71	86	88	7.04769	5.60123	4.93396	6.42947	6.76028	7.67229	BAD81150.1	DnaJ protein -like [Oryza sativa Japonica Group]
LOC_Os01g17050.MSUv7.0	26	34	27	100	16	54	1.32466	1.79391	1.33582	5.62986	0.78193	2.92696	XP_025880491.1	calmodulin-binding protein 25-like [Oryza sativa Japonica Group]|BAD81151.1 unknown protein [Oryza sativa Japonica Group]|BAF04653.2 Os01g0278000 [Oryza sativa Japonica Group]
LOC_Os01g17060.MSUv7.0	479	430	578	391	469	451	10.831	10.0692	12.6916	9.76966	10.1724	10.8494	BAD81152.1	unknown protein [Oryza sativa Japonica Group]|BAG92511.1 unnamed protein product [Oryza sativa Japonica Group]
LOC_Os01g17065.MSUv7.0	134	131	122	126	198	182	18.4277	18.6564	16.2923	19.1472	26.1186	26.6276	EEE54327.1	hypothetical protein OsJ_01297 [Oryza sativa Japonica Group]
LOC_Os01g17070.MSUv7.0	148	170	155	93	108	107	3.54168	4.21296	3.60193	2.45923	2.47907	2.72411	XP_015627993.1	putative protease Do-like 14 [Oryza sativa Japonica Group]|XP_015628002.1 putative protease Do-like 14 [Oryza sativa Japonica Group]|BAD81154.1 unknown protein [Oryza sativa Japonica Group]|BAF04656.1 Os01g0278600 [Oryza sativa Japonica Group]|BAG91998.1 unnamed protein product [Oryza sativa Japonica Group]|EEE54328.1 hypothetical protein OsJ_01298 [Oryza sativa Japonica Group]|BAS71570.1 Os01g02…
LOC_Os01g17150.MSUv7.0	25	23	13	26	36	24	1.82238	1.73627	0.920234	2.09431	2.51721	1.86125	XP_015621905.1	50S ribosomal protein 5, chloroplastic [Oryza sativa Japonica Group]|BAD81162.1 ribosomal protein, chloroplast -like [Oryza sativa Japonica Group]|BAF04657.1 Os01g0278900 [Oryza sativa Japonica Group]|EAY73512.1 hypothetical protein OsI_01394 [Oryza sativa Indica Group]|BAH00009.1 unnamed protein product [Oryza sativa Japonica Group]|EEE54330.1 hypothetical protein OsJ_01303 [Oryza sativa Japonic…
LOC_Os01g17160.MSUv7.0	112	119	343	97	48	76	1.79393	1.9739	5.33504	1.71683	0.737475	1.29508	BAF04658.1	Os01g0279000, partial [Oryza sativa Japonica Group]|BAS71576.1 Os01g0279000, partial [Oryza sativa Japonica Group]
LOC_Os01g17170.MSUv7.0	28	14	16	23	16	26	0.624995	0.323622	0.346812	0.567302	0.342576	0.617427	XP_015622109.1	magnesium-protoporphyrin IX monomethyl ester [oxidative] cyclase, chloroplastic [Oryza sativa Japonica Group]|BAA87823.1 putative ZIP [Oryza sativa Japonica Group]|BAA89564.1 putative ZIP [Oryza sativa Japonica Group]|BAF04659.1 Os01g0279100 [Oryza sativa Japonica Group]|BAG91384.1 unnamed protein product [Oryza sativa Japonica Group]|BAG86992.1 unnamed protein product [Oryza sativa Japonica Grou…
LOC_Os01g17180.MSUv7.0	781	834	816	697	782	779	26.7099	29.5378	27.0998	26.3403	25.6534	28.3434	AQK89246.1	COP9 signalosome complex subunit 2 [Zea mays]
LOC_Os01g17190.MSUv7.0	2336	2749	2877	2008	1342	2027	132.053	160.931	157.932	125.431	72.7688	121.905	XP_017256704.1	PREDICTED: esterase CG5412 [Daucus carota subsp. sativus]
LOC_Os01g17214.MSUv7.0	0	0	3	1	4	3	0	0	0.0847787	0.0321572	0.111658	0.0928806	XP_015621334.1	protein ZINC INDUCED FACILITATOR-LIKE 1 isoform X1 [Oryza sativa Japonica Group]|AAN33181.1 major facilitator superfamily antiporter [Oryza sativa Japonica Group]|BAD81084.1 major facilitator superfamily antiporter [Oryza sativa Japonica Group]|BAF04662.1 Os01g0279400 [Oryza sativa Japonica Group]|BAS71583.1 Os01g0279400 [Oryza sativa Japonica Group]
LOC_Os01g17240.MSUv7.0	39	46	49	61	75	113	0.854429	1.04366	1.04247	1.47676	1.57612	2.6338	XP_015648040.1	probable anion transporter 1, chloroplastic [Oryza sativa Japonica Group]|Q9SDI4.1 RecName: Full=Probable anion transporter 1, chloroplastic; AltName: Full=Phosphate transporter 4;1; Flags: Precursor|BAA87831.1 putative solute carrier family 17 (anion/sugar transporter), member 5 [Oryza sativa Japonica Group]|BAB17729.1 putative Na+-dependen inorganic phosphate cotransporter [Oryza sativa Japonic…
LOC_Os01g17250.MSUv7.0	658	715	935	695	820	721	30.0307	33.7937	41.4387	35.0503	35.8981	35.0081	XP_015621144.1	leucine-rich repeat protein 1-like [Oryza sativa Japonica Group]|BAD81087.1 putative LRR protein [Oryza sativa Japonica Group]|BAF04664.1 Os01g0279800 [Oryza sativa Japonica Group]|EAY73522.1 hypothetical protein OsI_01404 [Oryza sativa Indica Group]|EAZ11445.1 hypothetical protein OsJ_01312 [Oryza sativa Japonica Group]|BAG87735.1 unnamed protein product [Oryza sativa Japonica Group]|BAS71586.1 …
LOC_Os01g17260.MSUv7.0	560	550	586	484	665	553	14.2865	14.5308	14.5174	13.6443	16.2733	15.0091	XP_015621703.1	transcription factor TGA2.3 [Oryza sativa Japonica Group]|XP_015621704.1 transcription factor TGA2.3 [Oryza sativa Japonica Group]|XP_025880532.1 transcription factor TGA2.3 [Oryza sativa Japonica Group]|Q0JNL3.1 RecName: Full=Transcription factor TGA2.3; AltName: Full=OsNIF3; AltName: Full=bZIP transcription factor 3; Short=OsbZIP03|BAB72063.1 bZIP transcription factor [Oryza sativa]|BAF04665.1 …
LOC_Os01g17279.MSUv7.0	1209	1202	1402	1289	1655	1294	33.1474	34.1286	37.3273	39.0521	43.5251	37.7443	EEE54339.1	hypothetical protein OsJ_01315 [Oryza sativa Japonica Group]
LOC_Os01g17320.MSUv7.0	118	117	163	78	148	122	2.71531	2.78814	3.64234	1.98335	3.26676	2.9867	BAF04667.2	Os01g0280400, partial [Oryza sativa Japonica Group]
LOC_Os01g17330.MSUv7.0	13	27	7	9	0	5	0.526057	1.13147	0.27507	0.402439	0	0.215255	XP_015635348.1	eukaryotic translation initiation factor 6-2 isoform X2 [Oryza sativa Japonica Group]|BAD81094.1 putative integrin beta 4 binding protein [Oryza sativa Japonica Group]|BAD81590.1 putative integrin beta 4 binding protein [Oryza sativa Japonica Group]|BAF04668.1 Os01g0280500 [Oryza sativa Japonica Group]|BAG95915.1 unnamed protein product [Oryza sativa Japonica Group]|BAS71594.1 Os01g0280500 [Oryza…
LOC_Os01g17390.MSUv7.0	5270	4008	4557	5541	6042	4957	115.652	91.0879	97.1128	134.369	127.186	115.732	XP_015619955.1	F-box protein At2g32560 [Oryza sativa Japonica Group]|BAA87845.1 unknown protein [Oryza sativa Japonica Group]|BAB00648.2 unnamed protein product [Oryza sativa Japonica Group]|BAB17744.1 OSJNBa0036E02.18 [Oryza sativa Japonica Group]|BAB44118.1 unknown protein [Oryza sativa Japonica Group]|BAF04670.1 Os01g0281000 [Oryza sativa Japonica Group]|BAG89293.1 unnamed protein product [Oryza sativa Japon…
LOC_Os01g17396.MSUv7.0	13	34	28	90	86	39	0.39763	1.07698	0.831667	3.04191	2.5232	1.2691	BAB00649.1	unnamed protein product [Oryza sativa Japonica Group]|BAB17745.1 OSJNBa0036E02.19 [Oryza sativa Japonica Group]
LOC_Os01g17402.MSUv7.0	10	5	1	1	1	2	0.279915	0.144939	0.027182	0.030931	0.02685	0.0595593	Q0JNK6.2	RecName: Full=Cyclin-B1-3; AltName: Full=CYCB1;1; AltName: Full=G2/mitotic-specific cyclin-B1-3; Short=CycB1;3|BAB00651.1 unnamed protein product [Oryza sativa Japonica Group]|BAB17747.1 putative mitosis-specific cyclin 1 [Oryza sativa Japonica Group]|AAT67242.1 cyclin B1-1 [Oryza sativa Japonica Group]
LOC_Os01g17420.MSUv7.0	4	5	4	11	8	6	0.416129	0.538677	0.404095	1.26453	0.798318	0.664068	BAB00652.1	unnamed protein product [Oryza sativa Japonica Group]|BAB17748.1 OSJNBa0036E02.22 [Oryza sativa Japonica Group]|BAB44122.1 hypothetical protein [Oryza sativa Japonica Group]|BAS71601.1 Os01g0281301 [Oryza sativa Japonica Group]
LOC_Os01g17430.MSUv7.0	3838	3336	3731	3478	4029	3263	58.5075	52.6651	55.2315	58.5874	58.9144	52.9197	BAB17749.1	putative coatmer beta subunit (beta-coat protein) (beta-COP) [Oryza sativa Japonica Group]
LOC_Os01g17470.MSUv7.0	5	3	13	4	2	7	0.224269	0.139351	0.566237	0.198257	0.0860493	0.334034	XP_015634110.1	blue copper protein [Oryza sativa Japonica Group]|BAB17752.1 OSJNBa0036E02.28 [Oryza sativa Japonica Group]|BAB44126.1 unknown protein [Oryza sativa Japonica Group]|BAF04674.1 Os01g0281600 [Oryza sativa Japonica Group]|EAY73534.1 hypothetical protein OsI_01417 [Oryza sativa Indica Group]|EAZ11458.1 hypothetical protein OsJ_01327 [Oryza sativa Japonica Group]|BAG88396.1 unnamed protein product [Or…
LOC_Os01g18050.MSUv7.0	2043	1147	1655	1233	394	832	36.5539	21.253	28.7553	24.3779	6.76206	15.8373	EAZ11462.1	hypothetical protein OsJ_01331 [Oryza sativa Japonica Group]
LOC_Os01g18060.MSUv7.0	174	84	163	138	147	96	2.93777	1.46872	2.67246	2.57464	2.3807	1.72438	BAB39953.1	OSJNBa0004B13.7 [Oryza sativa Japonica Group]|BAB64213.1 unknown protein [Oryza sativa Japonica Group]|BAF04676.1 Os01g0283000 [Oryza sativa Japonica Group]|EAZ11463.1 hypothetical protein OsJ_01332 [Oryza sativa Japonica Group]|BAS71609.1 Os01g0283000 [Oryza sativa Japonica Group]
LOC_Os01g18070.MSUv7.0	1159	1219	1422	1083	1383	1106	48.1717	52.469	57.3935	49.7399	55.1376	48.9054	XP_015621025.1	gamma carbonic anhydrase 1, mitochondrial [Oryza sativa Japonica Group]|BAD82610.1 putative gamma-carbonic anhydrase [Oryza sativa Japonica Group]|BAF04677.1 Os01g0283100 [Oryza sativa Japonica Group]|BAG96503.1 unnamed protein product [Oryza sativa Japonica Group]|BAG87611.1 unnamed protein product [Oryza sativa Japonica Group]|BAG92644.1 unnamed protein product [Oryza sativa Japonica Group]|BAH…
LOC_Os01g18090.MSUv7.0	5	4	14	4	4	12	0.454008	0.376136	1.23446	0.401349	0.348395	1.15923	XP_015618897.1	uncharacterized protein LOC4327906 [Oryza sativa Japonica Group]|BAD81552.1 unknown protein [Oryza sativa Japonica Group]|BAD82611.1 unknown protein [Oryza sativa Japonica Group]|BAF04679.1 Os01g0283400 [Oryza sativa Japonica Group]|EAY73547.1 hypothetical protein OsI_01430 [Oryza sativa Indica Group]|EAZ11466.1 hypothetical protein OsJ_01335 [Oryza sativa Japonica Group]|BAG99833.1 unnamed prote…
LOC_Os01g18100.MSUv7.0	128	136	130	127	121	140	3.41073	3.7529	3.36384	3.73946	3.09272	3.96879	XP_015618795.1	rhomboid-like protein 14, mitochondrial [Oryza sativa Japonica Group]|BAB39959.1 OSJNBa0004B13.13 [Oryza sativa Japonica Group]|BAB39974.1 unknown protein [Oryza sativa Japonica Group]|BAB64219.1 unknown protein [Oryza sativa Japonica Group]|BAF04680.1 Os01g0283500 [Oryza sativa Japonica Group]|EEE54349.1 hypothetical protein OsJ_01336 [Oryza sativa Japonica Group]|BAS71613.1 Os01g0283500 [Oryza …
LOC_Os01g18110.MSUv7.0	0	0	0	3	0	2	0	0	0	0.162541	0	0.104327	BAF04681.1	Os01g0283600 [Oryza sativa Japonica Group]
LOC_Os01g18120.MSUv7.0	0	0	0	0	3	0	0	0	0	0	0.102239	0	XP_015642324.1	cinnamoyl-CoA reductase 1-like [Oryza sativa Japonica Group]|BAB39961.1 putative cinnamoyl-CoA reductase [Oryza sativa Japonica Group]|BAB39976.1 putative cinnamoyl-CoA reductase [Oryza sativa Japonica Group]|BAB64221.1 putative cinnamoyl-CoA reductase [Oryza sativa Japonica Group]|BAF04682.1 Os01g0283700 [Oryza sativa Japonica Group]|BAS71616.1 Os01g0283700 [Oryza sativa Japonica Group]
LOC_Os01g18150.MSUv7.0	4	0	0	6	0	3	0.188841	0	0	0.313008	0	0.150679	XP_015637367.1	mitogen-activated protein kinase kinase 9 [Oryza sativa Japonica Group]|BAB39963.1 OSJNBa0004B13.17 [Oryza sativa Japonica Group]|BAB39978.1 putative MAPKK [Oryza sativa Japonica Group]|BAB64223.1 putative MAPKK [Oryza sativa Japonica Group]|BAS71617.1 Os01g0284300 [Oryza sativa Japonica Group]
LOC_Os01g18170.MSUv7.0	2885	1675	2053	1362	864	1174	115.312	69.332	79.6842	60.1552	33.1253	49.9217	XP_015622834.1	germin-like protein 1-1 [Oryza sativa Japonica Group]|Q7F731.1 RecName: Full=Germin-like protein 1-1; AltName: Full=Germin-like protein 4; Short=OsGER4; Flags: Precursor|AAC04835.1 germin-like protein 4 [Oryza sativa Japonica Group]|BAB39965.1 probable germin protein 4 [Oryza sativa Japonica Group]|BAB39980.1 putative nectarin I [Oryza sativa Japonica Group]|BAB64225.1 putative nectarin I [Oryza …
LOC_Os01g18190.MSUv7.0	1	0	0	0	0	0	0.0334104	0	0	0	0	0	AAT38099.1	unknown protein [Oryza sativa Japonica Group]|AAV31395.1 putative hydroxyproline-rich glycoprotein [Oryza sativa Japonica Group]
LOC_Os01g18210.MSUv7.0	268	288	307	174	136	194	11.9693	13.3204	13.3146	8.58721	5.82628	9.21786	BAS71620.1	Os01g0284700 [Oryza sativa Japonica Group]
LOC_Os01g18220.MSUv7.0	17	9	13	58	25	38	0.508927	0.279023	0.377925	1.91868	0.717901	1.21028	XP_015630314.1	uncharacterized protein LOC4327913 [Oryza sativa Japonica Group]|BAB39969.1 OSJNBa0004B13.24 [Oryza sativa Japonica Group]|BAB39984.1 unknown protein [Oryza sativa Japonica Group]|BAB64229.1 unknown protein [Oryza sativa Japonica Group]|BAF04686.1 Os01g0284900 [Oryza sativa Japonica Group]|EAZ11475.1 hypothetical protein OsJ_01343 [Oryza sativa Japonica Group]|BAG97778.1 unnamed protein product […
LOC_Os01g18230.MSUv7.0	22	22	14	40	48	51	1.71397	1.77498	1.05916	3.44356	3.58706	4.22711	XP_015641246.1	berberine bridge enzyme-like 17 [Oryza sativa Japonica Group]
LOC_Os01g18240.MSUv7.0	69	63	79	69	64	60	1.60908	1.52146	1.789	1.77805	1.43161	1.48858	XP_015627109.1	transcription factor MYB61 [Oryza sativa Japonica Group]|BAB39972.1 putative transcription factor (myb) [Oryza sativa Japonica Group]|BAB39987.1 putative MYB2 [Oryza sativa Japonica Group]|BAF04687.1 Os01g0285300 [Oryza sativa Japonica Group]|EAZ11477.1 hypothetical protein OsJ_01345 [Oryza sativa Japonica Group]|BAG99428.1 unnamed protein product [Oryza sativa Japonica Group]|BAS71623.1 Os01g028…
LOC_Os01g18260.MSUv7.0	1	0	1	0	0	0	0.0182685	0	0.0177402	0	0	0	BAD67783.1	hypothetical protein [Oryza sativa Japonica Group]
LOC_Os01g18280.MSUv7.0	217	221	216	236	292	238	6.24521	6.58674	6.03665	7.50528	8.06098	7.28715	XP_015619048.1	uncharacterized protein LOC4327915 [Oryza sativa Japonica Group]|BAD81565.1 unknown protein [Oryza sativa Japonica Group]|BAF04688.1 Os01g0286000 [Oryza sativa Japonica Group]|BAS71626.1 Os01g0286000 [Oryza sativa Japonica Group]
LOC_Os01g18310.MSUv7.0	2	7	5	6	2	4	0.236373	0.856753	0.573842	0.783585	0.226733	0.502945	XP_015626066.1	uncharacterized protein LOC107280149 isoform X1 [Oryza sativa Japonica Group]
LOC_Os01g18320.MSUv7.0	45	21	45	32	43	30	1.16513	0.563082	1.13144	0.915545	1.06794	0.826374	BAD81569.1	putative protoporphyrinogen oxidase [Oryza sativa Japonica Group]
LOC_Os01g18360.MSUv7.0	52	65	120	38	43	35	2.7184	3.51896	6.09182	2.19514	2.15624	1.94658	CAF28456.1	putative IAA20 transcriptional repressor, partial [Oryza sativa Indica Group]
LOC_Os01g18370.MSUv7.0	2	2	4	0	0	0	0.18192	0.188396	0.353318	0	0	0	BAD81334.1	hypothetical protein [Oryza sativa Japonica Group]
LOC_Os01g18375.MSUv7.0	0	0	0	0	0	2	0	0	0	0	0	0.492886	EEE54355.1	hypothetical protein OsJ_01353 [Oryza sativa Japonica Group]
LOC_Os01g18390.MSUv7.0	18	11	20	7	15	15	1.07464	0.680103	1.15952	0.461804	0.859015	0.952744	AAO38009.1	putative reverse transcriptase [Oryza sativa Japonica Group]|AAO59987.1 putative reverse transcriptase [Oryza sativa Japonica Group]|ABF97441.1 retrotransposon protein, putative, unclassified [Oryza sativa Japonica Group]
LOC_Os01g18400.MSUv7.0	141	138	87	49	35	54	6.95922	7.05361	4.16981	2.67243	1.65702	2.8355	Q5NB11.1	RecName: Full=Chitinase 10; AltName: Full=Pathogenesis related (PR)-3 chitinase 10; Flags: Precursor|BAD81341.1 putative chitinase [Oryza sativa Japonica Group]|BAF04694.1 Os01g0287600 [Oryza sativa Japonica Group]|EAZ11500.1 hypothetical protein OsJ_01366 [Oryza sativa Japonica Group]|BAG88540.1 unnamed protein product [Oryza sativa Japonica Group]|BAS71636.1 Os01g0287600 [Oryza sativa Japonica …
LOC_Os01g18410.MSUv7.0	533	589	661	338	507	517	41.9005	47.9511	50.4602	29.3614	38.2312	43.2391	BAS71637.1	Os01g0287700 [Oryza sativa Japonica Group]
LOC_Os01g18450.MSUv7.0	5	5	3	1	4	3	1.07243	1.11061	0.62485	0.23701	0.822957	0.684564	XP_015642525.1	uncharacterized protein LOC4325150 [Oryza sativa Japonica Group]|BAD81344.1 unknown protein [Oryza sativa Japonica Group]|BAD86858.1 unknown protein [Oryza sativa Japonica Group]|BAF04696.1 Os01g0288200 [Oryza sativa Japonica Group]|EAY73585.1 hypothetical protein OsI_01469 [Oryza sativa Indica Group]|EAZ11512.1 hypothetical protein OsJ_01378 [Oryza sativa Japonica Group]|BAG88563.1 unnamed prote…
LOC_Os01g18490.MSUv7.0	2	13	0	4	3	21	0.358214	2.41127	0	0.791663	0.515409	4.00153	XP_015646428.1	uncharacterized protein LOC4325152 [Oryza sativa Japonica Group]|BAF04697.1 Os01g0288800 [Oryza sativa Japonica Group]|EAZ11513.1 hypothetical protein OsJ_01380 [Oryza sativa Japonica Group]|BAG98548.1 unnamed protein product [Oryza sativa Japonica Group]|BAS71643.1 Os01g0288800 [Oryza sativa Japonica Group]
LOC_Os01g18530.MSUv7.0	12	45	10	9	4	1	1.56752	6.08746	1.26849	1.2991	0.5012	0.138972	BAD81348.1	hypothetical protein [Oryza sativa Japonica Group]|BAD86862.1 hypothetical protein [Oryza sativa Japonica Group]
LOC_Os01g18584.MSUv7.0	400	471	507	465	277	418	11.3799	13.8769	14.0069	14.6184	7.55924	12.6517	BAH91013.1	Os01g0289666, partial [Oryza sativa Japonica Group]
LOC_Os01g18620.MSUv7.0	79	141	286	42	30	73	2.20305	4.07199	7.74493	1.29424	0.802482	2.16577	XP_025878331.1	malonyl-coenzyme:anthocyanin 5-O-glucoside-6&apos;&apos;&apos;-O-malonyltransferase [Oryza sativa Japonica Group]
LOC_Os01g18630.MSUv7.0	3378	3438	4546	2585	3607	3249	80.8736	85.2401	105.69	68.3873	82.8345	82.7543	XP_015613227.1	aspartic proteinase-like [Oryza sativa Japonica Group]|BAA96578.1 putative aspartic proteinase [Oryza sativa Japonica Group]|BAF04699.1 Os01g0290000 [Oryza sativa Japonica Group]|BAG90010.1 unnamed protein product [Oryza sativa Japonica Group]|BAG92899.1 unnamed protein product [Oryza sativa Japonica Group]|EEE54374.1 hypothetical protein OsJ_01384 [Oryza sativa Japonica Group]|BAS71651.1 Os01g02…
LOC_Os01g18640.MSUv7.0	1130	1207	1299	1138	1339	1155	25.4409	28.1419	28.4001	28.3116	28.917	27.665	XP_015613237.1	putative L-cysteine desulfhydrase 1 isoform X1 [Oryza sativa Japonica Group]|Q9LGZ2.1 RecName: Full=Putative L-cysteine desulfhydrase 1; AltName: Full=OsL-CDes1; Short=L-CDes1|BAA96579.1 Isopenicillin N epimerase -like [Oryza sativa Japonica Group]|BAF04700.1 Os01g0290100 [Oryza sativa Japonica Group]|BAS71653.1 Os01g0290100 [Oryza sativa Japonica Group]
LOC_Os01g18660.MSUv7.0	664	629	964	540	604	631	19.4644	19.0948	27.4414	17.4918	16.9836	19.6787	BAS71654.1	Os01g0290600 [Oryza sativa Japonica Group]
LOC_Os01g18670.MSUv7.0	9075	13979	8033	3744	4054	4343	122.6	195.574	105.384	55.8917	52.5346	62.4204	EAZ11523.1	hypothetical protein OsJ_01389 [Oryza sativa Japonica Group]
LOC_Os01g18730.MSUv7.0	0	2	0	0	0	0	0	0.0996777	0	0	0	0	BAD86874.1	hypothetical protein [Oryza sativa Japonica Group]
LOC_Os01g18744.MSUv7.0	3614	3163	3561	2872	2903	1952	113.54	102.908	108.639	99.7038	87.4831	65.2428	XP_015621300.1	acyl transferase 4 [Oryza sativa Japonica Group]|Q5JNT2.1 RecName: Full=Acyl transferase 4; Short=OsAT4; AltName: Full=p-coumaroyl-CoA monolignol transferase; Short=OsPMT|BAD86875.1 3&apos;-N-debenzoyltaxol N-benzoyltransferase -like [Oryza sativa Japonica Group]|BAF04705.1 Os01g0291500 [Oryza sativa Japonica Group]|EAZ11526.1 hypothetical protein OsJ_01392 [Oryza sativa Japonica Group]|BAG91955.…
LOC_Os01g18800.MSUv7.0	251	673	316	265	293	622	4.86687	13.5139	5.95003	5.67793	5.44957	12.831	XP_015622076.1	CBL-interacting protein kinase 1 [Oryza sativa Japonica Group]|Q9LGV5.1 RecName: Full=CBL-interacting protein kinase 1; AltName: Full=OsCIPK01|BAA96628.1 putative CBL-interacting protein kinase 1 [Oryza sativa Japonica Group]|BAF04706.1 Os01g0292200 [Oryza sativa Japonica Group]|ACD76973.1 CBL-interacting protein kinase 1 [Oryza sativa Japonica Group]|BAG89573.1 unnamed protein product [Oryza sat…
LOC_Os01g18850.MSUv7.0	3220	3426	3785	2317	2678	3392	44.1999	48.7016	50.4529	35.1446	35.2609	49.5353	XP_015614279.1	squamosa promoter-binding-like protein 1 isoform X1 [Oryza sativa Japonica Group]
LOC_Os01g18860.MSUv7.0	782	889	816	902	1052	941	24.1314	28.4098	24.4524	30.7575	31.1394	30.8929	XP_015614349.1	S-adenosylmethionine synthase 3 [Oryza sativa Japonica Group]|XP_015614357.1 S-adenosylmethionine synthase 3 [Oryza sativa Japonica Group]|Q9LGU6.1 RecName: Full=S-adenosylmethionine synthase 3; Short=AdoMet synthase 3; AltName: Full=Methionine adenosyltransferase 3; Short=MAT 3|BAA96637.1 putative S-adenosyl-L-methionine synthetase [Oryza sativa Japonica Group]|BAF04708.1 Os01g0293000 [Oryza sat…
LOC_Os01g18880.MSUv7.0	279	222	310	238	350	281	3.27733	2.7006	3.53617	3.08931	3.94368	3.51169	BAF04710.2	Os01g0293200 [Oryza sativa Japonica Group]
LOC_Os01g18890.MSUv7.0	1	1	2	1	0	1	0.0678648	0.0702806	0.131804	0.0749916	0	0.0722001	XP_015643507.1	peroxidase 5 [Oryza sativa Japonica Group]|BAA96643.1 putative peroxidase 1 [Oryza sativa Japonica Group]|BAB12025.1 putative peroxidase 1 [Oryza sativa Japonica Group]|CAH69249.1 TPA: class III peroxidase 6 precursor [Oryza sativa Japonica Group]
LOC_Os01g18900.MSUv7.0	0	1	1	0	1	0	0	0.181736	0.170414	0	0.168332	0	EAY73611.1	hypothetical protein OsI_01497 [Oryza sativa Indica Group]
LOC_Os01g18950.MSUv7.0	0	0	2	0	0	0	0	0	0.100722	0	0	0	EAY73616.1	hypothetical protein OsI_01504 [Oryza sativa Indica Group]
LOC_Os01g18970.MSUv7.0	0	0	2	3	0	4	0	0	0.09752	0.166455	0	0.213679	XP_015626351.1	peroxidase 2 [Oryza sativa Japonica Group]|CAH69253.1 TPA: class III peroxidase 10 precursor [Oryza sativa Japonica Group]|EAZ11541.1 hypothetical protein OsJ_01406 [Oryza sativa Japonica Group]|BAS71677.1 Os01g0294500 [Oryza sativa Japonica Group]
LOC_Os01g19020.MSUv7.0	262	157	299	173	62	142	9.60977	5.96351	10.6497	7.01174	2.18133	5.54107	EAY73614.1	hypothetical protein OsI_01501 [Oryza sativa Indica Group]
LOC_Os01g19050.MSUv7.0	0	0	0	2	0	0	0	0	0	0.0399955	0	0	XP_025880431.1	protein FAR1-RELATED SEQUENCE 5 [Oryza sativa Japonica Group]|CAE02218.2 OSJNBb0002N06.8 [Oryza sativa Japonica Group]
LOC_Os01g19070.MSUv7.0	0	0	0	0	1	0	0	0	0	0	0.0548187	0	BAD81939.1	hydroxyproline-rich glycoprotein-like [Oryza sativa Japonica Group]
LOC_Os01g19110.MSUv7.0	0	0	0	0	2	0	0	0	0	0	0.0787938	0	ABA98514.1	transposon protein, putative, CACTA, En/Spm sub-class [Oryza sativa Japonica Group]
LOC_Os01g19130.MSUv7.0	1296	1295	1176	1045	870	1282	40.3029	41.7054	35.5136	35.91	25.9519	42.4144	XP_015622472.1	probable protein phosphatase 2C 2 [Oryza sativa Japonica Group]|Q9FYN7.1 RecName: Full=Probable protein phosphatase 2C 2; Short=OsPP2C02|BAB12036.1 putative protein phosphatase-2C; PP2C [Oryza sativa Japonica Group]|BAF04715.1 Os01g0295700 [Oryza sativa Japonica Group]|EAY73620.1 hypothetical protein OsI_01508 [Oryza sativa Indica Group]|EAZ11544.1 hypothetical protein OsJ_01409 [Oryza sativa Jap…
LOC_Os01g19140.MSUv7.0	108	91	86	117	150	150	4.02933	3.51594	3.11575	4.82351	5.36807	5.9538	BAS71683.1	Os01g0295900, partial [Oryza sativa Japonica Group]
LOC_Os01g19160.MSUv7.0	155	114	108	99	126	93	5.04284	3.84095	3.4121	3.55915	3.93216	3.21899	XP_025880676.1	MDIS1-interacting receptor like kinase 2 isoform X2 [Oryza sativa Japonica Group]
LOC_Os01g19150.MSUv7.0	2457	2189	2108	2478	2872	2468	52.6993	48.6223	43.9061	58.7312	59.0883	56.3168	XP_015615997.1	shaggy-related protein kinase alpha isoform X1 [Oryza sativa Japonica Group]
LOC_Os01g19170.MSUv7.0	598	432	395	508	152	206	18.7082	13.996	12.0001	17.5615	4.56134	6.85633	XP_015616013.1	polygalacturonase At1g48100 [Oryza sativa Japonica Group]|BAF04719.1 Os01g0296200 [Oryza sativa Japonica Group]|EAZ11548.1 hypothetical protein OsJ_01413 [Oryza sativa Japonica Group]
LOC_Os01g19220.MSUv7.0	13	1	9	9	0	13	0.24027	0.0191402	0.16153	0.183809	0	0.255619	XP_015630013.1	probable beta-D-xylosidase 2 [Oryza sativa Japonica Group]|BAB55751.1 putative alpha-L-arabinofuranosidase/beta-D- xylosidase isoenzyme ARA-I [Oryza sativa Japonica Group]
LOC_Os01g19240.MSUv7.0	22	41	52	15	24	14	1.06466	2.05478	2.4437	0.802138	1.11409	0.720795	BAB55753.1	putative MtN21 [Oryza sativa Japonica Group]|BAH91020.1 Os01g0296900 [Oryza sativa Japonica Group]
LOC_Os01g19260.MSUv7.0	638	878	1468	378	449	442	17.2562	24.5929	38.5572	11.2975	11.649	12.7186	XP_015619759.1	AAA-ATPase At3g28580 [Oryza sativa Japonica Group]|BAB55757.1 AAA-type ATPase -like [Oryza sativa Japonica Group]|BAF04722.1 Os01g0297200 [Oryza sativa Japonica Group]|BAG98946.1 unnamed protein product [Oryza sativa Japonica Group]|BAS71692.1 Os01g0297200 [Oryza sativa Japonica Group]
LOC_Os01g19290.MSUv7.0	0	14	0	14	4	2	0	0.437048	0	0.466344	0.115661	0.0641408	XP_015632176.1	WAT1-related protein At1g09380 isoform X2 [Oryza sativa Japonica Group]|BAD86902.1 putative MtN21 [Oryza sativa Japonica Group]|BAD86994.1 putative MtN21 [Oryza sativa Japonica Group]|BAF04723.1 Os01g0297700 [Oryza sativa Japonica Group]|EAZ11555.1 hypothetical protein OsJ_01420 [Oryza sativa Japonica Group]|BAG97761.1 unnamed protein product [Oryza sativa Japonica Group]|BAS71693.1 Os01g0297700 …
LOC_Os01g19320.MSUv7.0	29	33	22	46	24	28	3.67758	4.3338	2.7092	6.44599	2.9194	3.7776	BAS71695.1	Os01g0298200 [Oryza sativa Japonica Group]
LOC_Os01g19330.MSUv7.0	103	162	166	41	24	56	4.88923	7.96359	7.65186	2.15058	1.09278	2.82804	XP_015630818.1	transcription factor MYB2-like [Oryza sativa Japonica Group]|BAB55768.1 putative typical P-type R2R3 Myb protein [Oryza sativa Japonica Group]|BAB67851.1 putative typical P-type R2R3 Myb protein [Oryza sativa Japonica Group]|BAF04724.1 Os01g0298400 [Oryza sativa Japonica Group]|EAZ11558.1 hypothetical protein OsJ_01424 [Oryza sativa Japonica Group]|BAH01066.1 unnamed protein product [Oryza sativa…
LOC_Os01g19340.MSUv7.0	1	0	0	0	0	0	0.124096	0	0	0	0	0	BAD86906.1	hypothetical protein [Oryza sativa Japonica Group]|BAD86998.1 hypothetical protein [Oryza sativa Japonica Group]
LOC_Os01g19380.MSUv7.0	71	55	61	22	57	74	2.66994	2.14188	2.22755	0.914183	2.05606	2.96052	BAS71702.1	Os01g0299200 [Oryza sativa Japonica Group]
LOC_Os01g19390.MSUv7.0	174	224	227	91	160	161	6.65852	8.87702	8.43548	3.84803	5.87309	6.55463	XP_015627625.1	probable glycerol-3-phosphate acyltransferase 3 [Oryza sativa Japonica Group]|BAD86910.1 hypothetical protein [Oryza sativa Japonica Group]
LOC_Os01g19400.MSUv7.0	201	235	309	276	199	200	14.1379	17.1177	21.1058	21.4518	13.4264	14.9662	AAL74273.1	Unknown protein [Oryza sativa]|AAP52131.1 expressed protein [Oryza sativa Japonica Group]
LOC_Os01g19410.MSUv7.0	3740	3465	3504	3782	4961	3655	118.139	113.348	107.483	132.011	150.317	122.83	XP_025880711.1	uncharacterized protein LOC4325774 isoform X2 [Oryza sativa Japonica Group]|BAD87815.1 unknown protein [Oryza sativa Japonica Group]|BAD86912.1 unknown protein [Oryza sativa Japonica Group]|BAF04728.1 Os01g0299500 [Oryza sativa Japonica Group]|BAS71705.1 Os01g0299500 [Oryza sativa Japonica Group]
LOC_Os01g19430.MSUv7.0	0	0	2	2	0	0	0	0	0.120078	0.136639	0	0	XP_015644590.1	Werner Syndrome-like exonuclease [Oryza sativa Japonica Group]|BAB60933.1 unknown protein [Oryza sativa Japonica Group]|BAB67862.1 unknown protein [Oryza sativa Japonica Group]|BAF04730.1 Os01g0300000 [Oryza sativa Japonica Group]|EAY73650.1 hypothetical protein OsI_01539 [Oryza sativa Indica Group]|EAZ11566.1 hypothetical protein OsJ_01433 [Oryza sativa Japonica Group]|BAG88780.1 unnamed protein…
LOC_Os01g19440.MSUv7.0	5	2	5	0	0	0	0.258532	0.107094	0.251056	0	0	0	XP_025880723.1	probable pectinesterase 55 isoform X1 [Oryza sativa Japonica Group]
LOC_Os01g19450.MSUv7.0	3053	3203	3257	2438	2311	2291	63.5728	69.0705	65.8594	56.0979	46.1597	50.7532	EMS54311.1	putative ATP-citrate synthase [Triticum urartu]
LOC_Os01g19470.MSUv7.0	1154	1113	1215	923	1093	1040	14.988	14.97	15.3239	13.2467	13.6168	14.3702	XP_015620661.1	nodal modulator 1 [Oryza sativa Japonica Group]|EAZ11570.1 hypothetical protein OsJ_01438 [Oryza sativa Japonica Group]
LOC_Os01g19480.MSUv7.0	30	13	34	20	39	17	0.560432	0.251499	0.616788	0.412857	0.69885	0.337866	XP_015630546.1	acyl-CoA-binding domain-containing protein 4 [Oryza sativa Japonica Group]|BAB60943.1 putative p40 [Oryza sativa Japonica Group]|BAF04733.1 Os01g0300900 [Oryza sativa Japonica Group]|BAS71716.1 Os01g0300900 [Oryza sativa Japonica Group]
LOC_Os01g19490.MSUv7.0	317	292	349	419	594	396	6.94789	6.62777	7.42805	10.1479	12.4882	9.23385	XP_015649626.1	pentatricopeptide repeat-containing protein At4g01990, mitochondrial [Oryza sativa Japonica Group]|BAD87826.1 putative DNA-binding protein [Oryza sativa Japonica Group]|BAF04734.1 Os01g0301000 [Oryza sativa Japonica Group]|BAG89859.1 unnamed protein product [Oryza sativa Japonica Group]|BAG93359.1 unnamed protein product [Oryza sativa Japonica Group]|BAS71718.1 Os01g0301000 [Oryza sativa Japonica…
LOC_Os01g19500.MSUv7.0	3	9	5	6	6	8	0.566523	1.76007	0.9169	1.25203	1.08684	1.60724	BAD87827.1	unknown protein [Oryza sativa Japonica Group]|BAH91023.1 Os01g0301100 [Oryza sativa Japonica Group]
LOC_Os01g19529.MSUv7.0	1	6	5	3	2	5	0.0307675	0.191176	0.149389	0.101996	0.0590256	0.163665	BAD87829.1	putative DNA-binding protein [Oryza sativa Japonica Group]|BAF04737.1 Os01g0301500 [Oryza sativa Japonica Group]|EEE54409.1 hypothetical protein OsJ_01440 [Oryza sativa Japonica Group]|BAS71721.1 Os01g0301500 [Oryza sativa Japonica Group]
LOC_Os01g19548.MSUv7.0	31	47	51	48	65	39	0.701269	1.10106	1.12034	1.19986	1.41044	0.938602	XP_015625445.1	pentatricopeptide repeat-containing protein At4g01990, mitochondrial [Oryza sativa Japonica Group]|BAB60950.1 putative DNA-binding protein [Oryza sativa Japonica Group]|BAF04738.1 Os01g0301700 [Oryza sativa Japonica Group]|EAY73664.1 hypothetical protein OsI_01547 [Oryza sativa Indica Group]|EAZ11577.1 hypothetical protein OsJ_01442 [Oryza sativa Japonica Group]|BAG94656.1 unnamed protein product…
LOC_Os01g19590.MSUv7.0	2	2	1	0	0	0	0.0476636	0.0493603	0.0231426	0	0	0	CAD39899.2	OSJNBa0065B15.3 [Oryza sativa Japonica Group]
LOC_Os01g19660.MSUv7.0	1	0	0	0	0	0	0.022245	0	0	0	0	0	ABA98106.2	retrotransposon protein, putative, unclassified [Oryza sativa Japonica Group]
LOC_Os01g19670.MSUv7.0	43	48	35	67	72	62	4.78882	5.53594	3.78515	8.24523	7.69149	7.3459	BAD45028.1	hypothetical protein [Oryza sativa Japonica Group]
LOC_Os01g19694.MSUv7.0	148	142	187	83	90	149	4.76454	4.7341	5.84596	2.9526	2.7792	5.10315	XP_015634297.1	homeobox protein knotted-1-like 1 [Oryza sativa Japonica Group]|Q9FP29.1 RecName: Full=Homeobox protein knotted-1-like 1; AltName: Full=Homeobox protein HOS16; AltName: Full=Homeobox protein OSH6|BAB19772.1 putative knotted1-type homeobox protein [Oryza sativa Japonica Group]|BAB93157.1 knotted1-type homeobox protein OSH6 [Oryza sativa Japonica Group]|BAF04741.1 Os01g0302500 [Oryza sativa Japonic…
LOC_Os01g19710.MSUv7.0	4	1	2	3	2	5	0.092658	0.0239891	0.0449892	0.0767914	0.0444397	0.123222	AAX96367.1	transposon protein, putative, CACTA, En/Spm sub-class [Oryza sativa Japonica Group]|ABA91927.1 transposon protein, putative, CACTA, En/Spm sub-class [Oryza sativa Japonica Group]
LOC_Os01g19730.MSUv7.0	2	2	0	0	0	2	0.287163	0.297385	0	0	0	0.305508	BAB19775.1	P0035H10.17 [Oryza sativa Japonica Group]
LOC_Os01g19740.MSUv7.0	2	0	7	0	1	4	0.140675	0	0.478124	0	0.0674692	0.299324	XP_015616280.1	calvin cycle protein CP12-1, chloroplastic [Oryza sativa Japonica Group]|BAB19776.1 P0035H10.18 [Oryza sativa Japonica Group]|BAB93161.1 putative CP12 [Oryza sativa Japonica Group]|BAF04744.1 Os01g0303000 [Oryza sativa Japonica Group]|EAZ11584.1 hypothetical protein OsJ_01448 [Oryza sativa Japonica Group]|BAG95340.1 unnamed protein product [Oryza sativa Japonica Group]|BAG86845.1 unnamed protein …
LOC_Os01g19750.MSUv7.0	1	0	0	2	1	1	0.0417964	0	0	0.0923713	0.0400919	0.0444665	XP_015644857.1	acidic endochitinase SE2 [Oryza sativa Japonica Group]|BAD45036.1 putative class III chitinase [Oryza sativa Japonica Group]|BAF04745.1 Os01g0303100 [Oryza sativa Japonica Group]|BAG88380.1 unnamed protein product [Oryza sativa Japonica Group]|BAS71734.1 Os01g0303100 [Oryza sativa Japonica Group]
LOC_Os01g19760.MSUv7.0	381	342	342	297	290	237	5.29258	4.91994	4.61343	4.55898	3.86419	3.50255	XP_015621886.1	protein FAM91A1 [Oryza sativa Japonica Group]|BAD45037.1 transmembrane domain, a coiled coil-4 domain, of eukaryotic origin (91.3 kD) -like protein [Oryza sativa Japonica Group]|BAF04746.1 Os01g0303200 [Oryza sativa Japonica Group]|EEE54411.1 hypothetical protein OsJ_01450 [Oryza sativa Japonica Group]|BAS71735.1 Os01g0303200 [Oryza sativa Japonica Group]
LOC_Os01g19770.MSUv7.0	10	12	13	23	6	8	0.46124	0.573191	0.582272	1.17226	0.265458	0.392564	BAB20636.1	putative stress-inducible membrane pore protein [Oryza sativa Japonica Group]|BAB93165.1 putative stress-inducible membrane pore protein [Oryza sativa Japonica Group]
LOC_Os01g19800.MSUv7.0	212	242	232	235	156	253	12.0759	14.2755	12.833	14.7918	8.52368	15.332	EAZ11588.1	hypothetical protein OsJ_01452 [Oryza sativa Japonica Group]
LOC_Os01g19820.MSUv7.0	819	766	742	793	1061	844	39.5244	38.2826	34.7729	42.2886	49.1151	43.3329	XP_015627779.1	universal stress protein PHOS34 [Oryza sativa Japonica Group]|BAD44900.1 putative ER6 protein [Oryza sativa Japonica Group]|BAD45043.1 putative ER6 protein [Oryza sativa Japonica Group]|BAF04749.1 Os01g0303800 [Oryza sativa Japonica Group]|BAG87307.1 unnamed protein product [Oryza sativa Japonica Group]|EEE54413.1 hypothetical protein OsJ_01453 [Oryza sativa Japonica Group]|BAS71741.1 Os01g030380…
LOC_Os01g19840.MSUv7.0	1041	1311	1683	1128	906	903	98.4702	128.424	154.594	117.905	82.2054	90.8731	OAY67217.1	60S ribosomal protein L29-1 [Ananas comosus]
LOC_Os01g19850.MSUv7.0	11	22	14	8	8	9	0.239783	0.496637	0.296353	0.192701	0.167276	0.208719	XP_015632062.1	cation-chloride cotransporter 2 isoform X1 [Oryza sativa Japonica Group]|Q657W3.2 RecName: Full=Cation-chloride cotransporter 2; Short=OsCCC2; AltName: Full=Potassium-chloride cotransporter 2|CAJ40614.1 TPA: putative cation chloride cotransporter 2 [Oryza sativa Japonica Group]
LOC_Os01g19870.MSUv7.0	215	359	268	183	124	163	3.49745	6.04781	4.23354	3.28952	1.93487	2.82094	BAD44906.1	hypothetical protein [Oryza sativa Japonica Group]|EAZ11594.1 hypothetical protein OsJ_01458 [Oryza sativa Japonica Group]|EEC70493.1 hypothetical protein OsI_01565 [Oryza sativa Indica Group]
LOC_Os01g19880.MSUv7.0	88	101	153	44	18	10	6.00337	7.1355	10.1358	3.3169	1.17788	0.725782	XP_015645376.1	uncharacterized protein LOC4323907 [Oryza sativa Japonica Group]|BAB20650.1 hypothetical protein [Oryza sativa Japonica Group]|BAF04753.1 Os01g0304400 [Oryza sativa Japonica Group]|EAY73682.1 hypothetical protein OsI_01566 [Oryza sativa Indica Group]|BAS71746.1 Os01g0304400 [Oryza sativa Japonica Group]
LOC_Os01g19910.MSUv7.0	9	18	12	12	7	18	0.883392	1.82968	1.14379	1.30155	0.659063	1.87965	BAD44908.1	hypothetical protein [Oryza sativa Japonica Group]|BAD44918.1 hypothetical protein [Oryza sativa Japonica Group]
LOC_Os01g19940.MSUv7.0	562	1078	555	357	182	366	29.4092	58.4192	28.203	20.6435	9.13557	20.3761	EAZ11597.1	hypothetical protein OsJ_01461 [Oryza sativa Japonica Group]
LOC_Os01g19960.MSUv7.0	0	2	1	0	1	0	0	0.0320805	0.015041	0	0.0148573	0	ABA98289.1	transposon protein, putative, CACTA, En/Spm sub-class [Oryza sativa Japonica Group]
LOC_Os01g19970.MSUv7.0	3	28	1	0	4	0	0.120555	1.16524	0.039023	0	0.154186	0	XP_015628164.1	myb-related protein P [Oryza sativa Japonica Group]|BAB20661.1 putative R2R3 Myb transcription factor MYB-IF35 [Oryza sativa Japonica Group]|BAB64029.1 putative R2R3 Myb transcription factor MYB-IF35 [Oryza sativa Japonica Group]|EEE54417.1 hypothetical protein OsJ_01463 [Oryza sativa Japonica Group]|BAS71749.1 Os01g0305900 [Oryza sativa Japonica Group]
LOC_Os01g19990.MSUv7.0	2	8	5	9	1	1	0.113305	0.469352	0.27507	0.563415	0.054342	0.0602714	XP_015646169.1	eukaryotic translation initiation factor 4B1 [Oryza sativa Japonica Group]|BAF04757.1 Os01g0306100 [Oryza sativa Japonica Group]|BAG99132.1 unnamed protein product [Oryza sativa Japonica Group]|BAS71750.1 Os01g0306100 [Oryza sativa Japonica Group]
LOC_Os01g20000.MSUv7.0	0	0	0	0	0	1	0	0	0	0	0	0.22269	XP_015645669.1	uncharacterized protein LOC4323913 [Oryza sativa Japonica Group]|BAD44929.1 unknown protein [Oryza sativa Japonica Group]|BAD45319.1 unknown protein [Oryza sativa Japonica Group]|EAY73687.1 hypothetical protein OsI_01572 [Oryza sativa Indica Group]|BAG92490.1 unnamed protein product [Oryza sativa Japonica Group]|BAF04758.2 Os01g0306200 [Oryza sativa Japonica Group]|BAS71751.1 Os01g0306200 [Oryza …
LOC_Os01g20010.MSUv7.0	4	0	1	0	2	1	0.780826	0	0.189561	0	0.374492	0.207677	BAD44930.1	hypothetical protein [Oryza sativa Japonica Group]|BAD45320.1 hypothetical protein [Oryza sativa Japonica Group]|EAY73688.1 hypothetical protein OsI_01573 [Oryza sativa Indica Group]|EAZ11602.1 hypothetical protein OsJ_01466 [Oryza sativa Japonica Group]|BAS71752.1 Os01g0306301 [Oryza sativa Japonica Group]
LOC_Os01g20030.MSUv7.0	8	11	6	5	4	20	0.564988	0.804512	0.411487	0.3902	0.270974	1.5027	XP_015643118.1	protein DOG1-like 4 [Oryza sativa Japonica Group]|EAY73690.1 hypothetical protein OsI_01574 [Oryza sativa Indica Group]|BAF04759.2 Os01g0306400 [Oryza sativa Japonica Group]
LOC_Os01g20080.MSUv7.0	4	0	0	0	0	0	0.126813	0	0	0	0	0	ABA91969.2	transposon protein, putative, CACTA, En/Spm sub-class [Oryza sativa Japonica Group]
LOC_Os01g20100.MSUv7.0	33	6	14	1	6	5	4.85866	0.914838	2.00164	0.162694	0.847367	0.783188	BAB64037.1	hypothetical protein [Oryza sativa Japonica Group]|BAB93386.1 hypothetical protein [Oryza sativa Japonica Group]|EAY73692.1 hypothetical protein OsI_01576 [Oryza sativa Indica Group]|EAZ11604.1 hypothetical protein OsJ_01468 [Oryza sativa Japonica Group]|AFA41787.1 mitochondrial white pancile 3, partial [Oryza sativa Japonica Group]|BAS71754.1 Os01g0306650 [Oryza sativa Japonica Group]
LOC_Os01g20110.MSUv7.0	104	99	105	42	82	61	2.99475	2.95225	2.93611	1.33642	2.26495	1.86875	EAY73693.1	hypothetical protein OsI_01577 [Oryza sativa Indica Group]
LOC_Os01g20120.MSUv7.0	359	388	380	315	279	314	9.70495	10.8623	9.97557	9.40973	7.2347	9.03071	EEC70497.1	hypothetical protein OsI_01578 [Oryza sativa Indica Group]|EEE54419.1 hypothetical protein OsJ_01470 [Oryza sativa Japonica Group]
LOC_Os01g20150.MSUv7.0	0	1	0	0	0	0	0	0.021142	0	0	0	0	CAD39425.2	OSJNBa0027H06.7 [Oryza sativa Japonica Group]
LOC_Os01g20160.MSUv7.0	823	762	1579	560	512	551	19.822	19.0061	36.9306	14.9041	11.8287	14.1187	A2WNZ9.2	RecName: Full=Cation transporter HKT8; Short=OsHKT8; AltName: Full=HKT1;5
LOC_Os01g20204.MSUv7.0	0	1	0	0	1	3	0	0.115332	0	0	0.106826	0.355447	EAY89486.1	hypothetical protein OsI_11016 [Oryza sativa Indica Group]
LOC_Os01g20206.MSUv7.0	78	130	168	41	25	144	5.05643	8.72738	10.5758	2.93698	1.55456	9.93129	XP_015625388.1	putative methyltransferase DDB_G0268948 [Oryza sativa Japonica Group]
LOC_Os01g20208.MSUv7.0	0	2	0	0	0	1	0	0.389715	0	0	0	0.200179	BAS71763.1	Os01g0307750, partial [Oryza sativa Japonica Group]
LOC_Os01g20700.MSUv7.0	0	0	4	0	0	5	0	0	0.196174	0	0	0.268652	EEE59266.1	hypothetical protein OsJ_11288 [Oryza sativa Japonica Group]
LOC_Os01g20710.MSUv7.0	5	1	8	0	6	7	0.348863	0.0722563	0.542039	0	0.401563	0.519609	BAD88386.1	hypothetical protein [Oryza sativa Japonica Group]
LOC_Os01g20720.MSUv7.0	61	62	61	16	74	49	0.980367	1.03191	0.952015	0.284149	1.1408	0.837816	BAH91025.1	Os01g0308300 [Oryza sativa Japonica Group]|BAS71766.1 Os01g0308300 [Oryza sativa Japonica Group]
LOC_Os01g20730.MSUv7.0	2	2	8	0	6	1	0.0922481	0.0955318	0.358321	0	0.265458	0.0490705	XP_015644236.1	uncharacterized protein LOC4327759 [Oryza sativa Japonica Group]|BAD88391.1 hypothetical protein [Oryza sativa Japonica Group]|BAF04764.1 Os01g0308600 [Oryza sativa Japonica Group]|BAS71767.1 Os01g0308600 [Oryza sativa Japonica Group]
LOC_Os01g20780.MSUv7.0	20	32	34	20	9	29	1.13428	1.87945	1.87251	1.2534	0.48961	1.74977	LOC_Os01g20780.MSUv7.0	-
LOC_Os01g20800.MSUv7.0	15	26	15	18	20	31	3.10239	5.5689	3.01267	4.11382	3.96783	6.82119	BAD45593.1	seed specific protein, 5&apos;-partial-like protein [Oryza sativa Japonica Group]|BAD88399.1 seed specific protein, 5&apos;-partial-like protein [Oryza sativa Japonica Group]
LOC_Os01g20830.MSUv7.0	1468	1554	1429	1025	1333	1276	50.3702	55.2191	47.6141	38.8633	43.8729	46.5792	XP_015621513.1	transcriptional regulatory protein LGE1 [Oryza sativa Japonica Group]|BAB92816.1 unknown protein [Oryza sativa Japonica Group]|BAC00691.1 OJ1116_C07.8 [Oryza sativa Japonica Group]|BAD88402.1 unknown protein [Oryza sativa Japonica Group]|BAF04766.1 Os01g0309800 [Oryza sativa Japonica Group]|EAY73702.1 hypothetical protein OsI_01581 [Oryza sativa Indica Group]|EAZ11610.1 hypothetical protein OsJ_0…
LOC_Os01g20840.MSUv7.0	1763	1531	1482	1568	2152	1661	40.0383	36.0072	32.6833	39.3493	46.8795	40.1316	XP_015622084.1	uncharacterized protein LOC4327762 [Oryza sativa Japonica Group]|BAB92817.1 lipase class 3-like protein [Oryza sativa Japonica Group]|BAC00692.1 OJ1116_C07.9 [Oryza sativa Japonica Group]|BAD88403.1 lipase class 3-like protein [Oryza sativa Japonica Group]|BAF04767.1 Os01g0309900 [Oryza sativa Japonica Group]|BAG94687.1 unnamed protein product [Oryza sativa Japonica Group]|BAS71773.1 Os01g0309900…
LOC_Os01g20850.MSUv7.0	0	1	4	0	0	1	0	0.191402	0.717913	0	0	0.19663	BAT08218.1	Os09g0432231 [Oryza sativa Japonica Group]
LOC_Os01g20860.MSUv7.0	589	556	660	509	561	589	10.3154	10.0841	11.2246	9.8505	9.4244	10.9744	XP_015622123.1	phospholipase D zeta 1 [Oryza sativa Japonica Group]
LOC_Os01g20880.MSUv7.0	86	114	94	35	143	254	1.51022	2.07318	1.60297	0.679169	2.40877	4.74536	XP_015648999.1	dual specificity protein kinase zak2 [Oryza sativa Japonica Group]|XP_015649008.1 dual specificity protein kinase zak2 [Oryza sativa Japonica Group]|XP_015649014.1 dual specificity protein kinase zak2 [Oryza sativa Japonica Group]|XP_015649022.1 dual specificity protein kinase zak2 [Oryza sativa Japonica Group]|XP_015649030.1 dual specificity protein kinase zak2 [Oryza sativa Japonica Group]|XP_0…
LOC_Os01g20890.MSUv7.0	2337	2041	2549	1322	2439	1635	50.8367	45.9783	53.8448	31.7774	50.8919	37.8382	BAC00699.1	OJ1116_C07.16 [Oryza sativa Japonica Group]
LOC_Os01g20894.MSUv7.0	0	0	0	7	2	0	0	0	0	0.882176	0.218795	0	BAD45597.1	unknown protein [Oryza sativa Japonica Group]|BAG99015.1 unnamed protein product [Oryza sativa Japonica Group]|BAH91029.1 Os01g0310600 [Oryza sativa Japonica Group]
LOC_Os01g20900.MSUv7.0	956	922	922	806	897	775	15.0217	15.0031	14.0685	13.9947	13.5198	12.9555	BAS71779.1	Os01g0310800 [Oryza sativa Japonica Group]
LOC_Os01g20910.MSUv7.0	36	65	83	109	39	46	1.98553	3.7126	4.44536	6.64306	2.06327	2.69914	XP_015649091.1	RING-H2 finger protein ATL64 [Oryza sativa Japonica Group]|BAS71780.1 Os01g0311100 [Oryza sativa Japonica Group]
LOC_Os01g20920.MSUv7.0	0	0	1	2	0	0	0	0	0.139429	0.31732	0	0	BAB92758.1	hypothetical protein [Oryza sativa Japonica Group]|BAB92829.1 hypothetical protein [Oryza sativa Japonica Group]
LOC_Os01g20930.MSUv7.0	122	138	104	194	208	203	8.24729	9.66098	6.82716	14.4918	13.4875	14.5996	EAY73710.1	hypothetical protein OsI_01589 [Oryza sativa Indica Group]|EAZ11616.1 hypothetical protein OsJ_01480 [Oryza sativa Japonica Group]
LOC_Os01g20940.MSUv7.0	1101	1064	920	1094	1414	1261	16.2424	16.2553	13.1797	17.8339	20.0092	19.7911	EEC70504.1	hypothetical protein OsI_01590 [Oryza sativa Indica Group]
LOC_Os01g20950.MSUv7.0	76	62	91	121	145	62	2.8153	2.37845	3.27347	4.95296	5.15226	2.44341	XP_015644185.1	cytosolic sulfotransferase 5 [Oryza sativa Japonica Group]|BAB92762.1 steroid sulfotransferase [Oryza sativa Japonica Group]|BAB92833.1 steroid sulfotransferase [Oryza sativa Japonica Group]|BAF04777.1 Os01g0311600 [Oryza sativa Japonica Group]|EAZ11618.1 hypothetical protein OsJ_01482 [Oryza sativa Japonica Group]|BAS71785.1 Os01g0311600 [Oryza sativa Japonica Group]
LOC_Os01g20970.MSUv7.0	0	0	0	0	1	0	0	0	0	0	0.0845933	0	XP_015645682.1	cell wall / vacuolar inhibitor of fructosidase 2 [Oryza sativa Japonica Group]|BAB92763.1 unknown protein [Oryza sativa Japonica Group]|BAF04778.1 Os01g0311700 [Oryza sativa Japonica Group]|EAZ11619.1 hypothetical protein OsJ_01483 [Oryza sativa Japonica Group]|BAG92997.1 unnamed protein product [Oryza sativa Japonica Group]|BAS71786.1 Os01g0311700 [Oryza sativa Japonica Group]
LOC_Os01g20980.MSUv7.0	313	1466	401	21	35	154	7.44914	36.1315	9.26747	0.552267	0.799001	3.8992	BAD45458.1	pectin methylesterase PME1-like protein [Oryza sativa Japonica Group]|BAS71788.1 Os01g0311800 [Oryza sativa Japonica Group]
LOC_Os01g21034.MSUv7.0	7	5	2	12	8	22	0.138617	0.102537	0.0384596	0.262584	0.151959	0.463485	XP_015625751.1	pectinesterase [Oryza sativa Japonica Group]|EEE54425.1 hypothetical protein OsJ_01485 [Oryza sativa Japonica Group]
LOC_Os01g21050.MSUv7.0	4	4	2	4	5	0	0.31163	0.322723	0.151309	0.344356	0.373652	0	BAD45461.1	hypothetical protein [Oryza sativa Japonica Group]
LOC_Os01g21070.MSUv7.0	62	29	52	80	29	59	1.53659	0.744312	1.25148	2.19091	0.689418	1.55565	EAY73719.1	hypothetical protein OsI_01596 [Oryza sativa Indica Group]
LOC_Os01g21100.MSUv7.0	2	1	0	0	3	0	0.169496	0.087765	0	0	0.243876	0	BAD45463.1	hypothetical protein [Oryza sativa Japonica Group]
LOC_Os01g21120.MSUv7.0	51	57	48	88	41	138	2.63181	3.04614	2.40536	5.01805	2.02949	7.5763	XP_015630785.1	ethylene-responsive transcription factor ERF071 [Oryza sativa Japonica Group]|BAB92777.1 putative ethylene response factor 2 [Oryza sativa Japonica Group]|BAF04782.1 Os01g0313300 [Oryza sativa Japonica Group]|BAG99412.1 unnamed protein product [Oryza sativa Japonica Group]|BAS71795.1 Os01g0313300 [Oryza sativa Japonica Group]
LOC_Os01g21130.MSUv7.0	0	0	0	4	0	2	0	0	0	0.331473	0	0.159568	BAD45468.1	hypothetical protein [Oryza sativa Japonica Group]|EAZ11627.1 hypothetical protein OsJ_01489 [Oryza sativa Japonica Group]|BAS71796.1 Os01g0313500 [Oryza sativa Japonica Group]
LOC_Os01g21144.MSUv7.0	36	34	62	81	112	229	0.681557	0.666606	1.13985	1.69454	2.03393	4.61242	XP_015612442.1	uncharacterized protein LOC9272492 [Oryza sativa Japonica Group]|BAB92782.1 unknown protein [Oryza sativa Japonica Group]|EAZ11629.1 hypothetical protein OsJ_01491 [Oryza sativa Japonica Group]|BAS71798.1 Os01g0314000 [Oryza sativa Japonica Group]
LOC_Os01g21160.MSUv7.0	1547	1850	1253	1585	1898	2902	26.1531	32.3888	20.5702	29.6094	30.7784	52.1943	XP_015612452.1	lipoamide acyltransferase component of branched-chain alpha-keto acid dehydrogenase complex, mitochondrial [Oryza sativa Japonica Group]|BAD45472.1 putative dihydrolipoylacyltransferase subunit of the branched-chain alpha-keto acid dehydrogenase complex [Oryza sativa Japonica Group]|BAF04784.1 Os01g0314100 [Oryza sativa Japonica Group]|EEE54427.1 hypothetical protein OsJ_01492 [Oryza sativa Japon…
LOC_Os01g21170.MSUv7.0	29	23	22	39	45	75	1.19296	0.979823	0.878834	1.77281	1.77566	3.28234	BAS71802.1	Os01g0314200 [Oryza sativa Japonica Group]
LOC_Os01g21180.MSUv7.0	1104	1201	1530	998	699	771	57.4832	64.7598	77.3603	57.4209	34.9114	42.709	KZM90459.1	hypothetical protein DCAR_022176 [Daucus carota subsp. sativus]
LOC_Os01g21240.MSUv7.0	295	236	329	171	338	237	5.86401	4.8582	6.35074	3.7561	6.44477	5.01204	XP_015626219.1	disease resistance protein RGA5-like isoform X1 [Oryza sativa Japonica Group]
LOC_Os01g21250.MSUv7.0	320	2189	344	368	34	597	59.1434	418.98	61.7405	75.1575	6.02772	117.388	XP_015624701.1	protein SENESCENCE-ASSOCIATED GENE 21, mitochondrial [Oryza sativa Japonica Group]|BAF04787.1 Os01g0314800 [Oryza sativa Japonica Group]|EAY73731.1 hypothetical protein OsI_01606 [Oryza sativa Indica Group]|EAZ11634.1 hypothetical protein OsJ_01496 [Oryza sativa Japonica Group]|BAS71806.1 Os01g0314800 [Oryza sativa Japonica Group]
LOC_Os01g21300.MSUv7.0	2	2	3	3	0	0	0.0679533	0.0703722	0.0989822	0.112634	0	0	BAF04788.1	Os01g0315600 [Oryza sativa Japonica Group]|BAG99038.1 unnamed protein product [Oryza sativa Japonica Group]|BAS71808.1 Os01g0315600 [Oryza sativa Japonica Group]
LOC_Os01g21310.MSUv7.0	15	14	34	11	2	0	1.03825	1.00353	2.28531	0.84134	0.132788	0	XP_015620899.1	caffeoylshikimate esterase [Oryza sativa Japonica Group]
LOC_Os01g21320.MSUv7.0	4515	4704	4421	4225	5127	4779	129.298	139.506	122.945	133.699	140.837	145.601	EAZ11639.1	hypothetical protein OsJ_01500 [Oryza sativa Japonica Group]
LOC_Os01g21380.MSUv7.0	171	253	455	187	254	322	7.15867	10.9685	18.4971	8.65059	10.1997	14.3412	BAB90345.1	putative L-pipecolic acid oxidase [Oryza sativa Japonica Group]|BAF04791.1 Os01g0316100 [Oryza sativa Japonica Group]
LOC_Os01g21410.MSUv7.0	390	405	396	410	401	354	18.8386	20.2596	18.5753	21.8845	18.58	18.192	XP_015624323.1	gametogenetin [Oryza sativa Japonica Group]
LOC_Os01g21420.MSUv7.0	1127	1193	992	1558	1567	1327	42.4725	46.5602	36.3037	64.8812	56.6461	53.2045	BAF04793.1	Os01g0316600, partial [Oryza sativa Japonica Group]
LOC_Os01g21440.MSUv7.0	936	961	1206	909	779	702	58.2849	61.9718	72.9261	62.5478	46.5303	46.5062	ABR25822.1	deleted in split hand/splt foot protein, partial [Oryza sativa Indica Group]
LOC_Os01g21450.MSUv7.0	1406	1414	1457	1462	2128	1835	20.736	21.5963	20.8667	23.8262	30.1043	28.7918	XP_015615608.1	uncharacterized protein LOC4327265 [Oryza sativa Japonica Group]
LOC_Os01g21490.MSUv7.0	2	0	2	0	0	1	0.0620478	0	0.0602534	0	0	0.0330058	ABA98856.1	transposon protein, putative, CACTA, En/Spm sub-class [Oryza sativa Japonica Group]
LOC_Os01g21520.MSUv7.0	0	6	5	2	5	6	0	1.13633	0.887945	0.404165	0.877099	1.16736	BAF04796.1	Os01g0317500 [Oryza sativa Japonica Group]|BAS71823.1 Os01g0317500 [Oryza sativa Japonica Group]
LOC_Os01g21560.MSUv7.0	125	119	203	142	140	139	4.55596	4.49166	7.1849	5.71908	4.89458	5.38987	XP_015628062.1	caffeoylshikimate esterase [Oryza sativa Japonica Group]|BAB62599.1 phospholipase-like protein [Oryza sativa Japonica Group]|BAB93436.1 phospholipase-like protein [Oryza sativa Japonica Group]|BAF04797.1 Os01g0317800 [Oryza sativa Japonica Group]|EAZ11646.1 hypothetical protein OsJ_01509 [Oryza sativa Japonica Group]|BAG97428.1 unnamed protein product [Oryza sativa Japonica Group]|BAS71824.1 Os01…
LOC_Os01g21580.MSUv7.0	1	0	0	0	0	0	0.0734087	0	0	0	0	0	BAS71825.1	Os01g0318000, partial [Oryza sativa Japonica Group]
LOC_Os01g21590.MSUv7.0	90	38	67	214	453	255	2.85329	1.24761	2.06269	7.49697	13.7759	8.60078	BAS71826.1	Os01g0318202, partial [Oryza sativa Japonica Group]
LOC_Os01g21610.MSUv7.0	198	181	179	132	216	186	7.66131	7.25283	6.72584	5.64391	8.01696	7.65675	XP_015621420.1	protein ABC transporter 1, mitochondrial [Oryza sativa Japonica Group]
LOC_Os01g21630.MSUv7.0	4	0	4	12	7	6	0.0890943	0	0.0865177	0.295351	0.149557	0.142179	XP_015635389.1	pectin acetylesterase 3 [Oryza sativa Japonica Group]|BAB62609.1 putative pectinacetylesterase precursor [Oryza sativa Japonica Group]|BAB93446.1 putative pectinacetylesterase precursor [Oryza sativa Japonica Group]|BAF04800.1 Os01g0319000 [Oryza sativa Japonica Group]|EEE54440.1 hypothetical protein OsJ_01514 [Oryza sativa Japonica Group]|BAS71832.1 Os01g0319000 [Oryza sativa Japonica Group]
LOC_Os01g21640.MSUv7.0	7	5	9	4	0	20	0.605043	0.447558	0.755416	0.382047	0	1.83913	XP_015646314.1	uncharacterized protein LOC107276509 [Oryza sativa Japonica Group]
LOC_Os01g21650.MSUv7.0	27	15	16	26	9	34	0.874065	0.502877	0.502985	0.930082	0.279473	1.17099	BAB62611.1	hypothetical protein [Oryza sativa Japonica Group]|BAF04801.1 Os01g0319200 [Oryza sativa Japonica Group]
LOC_Os01g21710.MSUv7.0	0	0	0	3	0	0	0	0	0	0.10725	0	0	BAD45208.1	hypothetical protein [Oryza sativa Japonica Group]|BAS71838.1 Os01g0320100 [Oryza sativa Japonica Group]
LOC_Os01g21740.MSUv7.0	0	0	1	0	0	0	0	0	0.095496	0	0	0	BAD44968.1	hypothetical protein [Oryza sativa Japonica Group]|BAD45211.1 hypothetical protein [Oryza sativa Japonica Group]|EAZ11657.1 hypothetical protein OsJ_01520 [Oryza sativa Japonica Group]|BAH91033.1 Os01g0320400 [Oryza sativa Japonica Group]|BAS71839.1 Os01g0320400 [Oryza sativa Japonica Group]
LOC_Os01g21820.MSUv7.0	651	675	684	561	762	616	9.70544	10.4215	9.90252	9.24198	10.897	9.77031	EAZ11664.1	hypothetical protein OsJ_01526 [Oryza sativa Japonica Group]
LOC_Os01g21850.MSUv7.0	476	477	542	314	323	343	7.11681	7.38563	7.86924	5.18771	4.63232	5.45589	XP_015621728.1	protein transport protein SEC23 [Oryza sativa Japonica Group]|BAF04805.1 Os01g0321700 [Oryza sativa Japonica Group]
LOC_Os01g21860.MSUv7.0	282	274	278	264	213	287	15.3103	15.4055	14.6566	15.8382	11.0926	16.5772	EAZ11666.1	hypothetical protein OsJ_01529 [Oryza sativa Japonica Group]
LOC_Os01g21870.MSUv7.0	7	3	1	0	1	4	0.996833	0.442422	0.138287	0	0.136597	0.606008	BAB21232.1	hypothetical protein [Oryza sativa Japonica Group]|EAY73762.1 hypothetical protein OsI_01636 [Oryza sativa Indica Group]|BAS71849.1 Os01g0321850 [Oryza sativa Japonica Group]
LOC_Os01g21920.MSUv7.0	0	0	0	1	0	0	0	0	0	0.0599932	0	0	BAS71852.1	Os01g0322500 [Oryza sativa Japonica Group]
LOC_Os01g21940.MSUv7.0	508	472	445	468	522	463	13.1792	12.6811	11.2109	13.4165	12.9901	12.7791	XP_020405405.1	uncharacterized protein LOC100381399 isoform X1 [Zea mays]|ONM31807.1 Suppressor of mec-8 and unc-52 protein homolog 1 [Zea mays]
LOC_Os01g21960.MSUv7.0	394	473	454	277	203	223	8.59939	10.6911	9.62238	6.68066	4.24996	5.17809	XP_015621697.1	probable receptor-like protein kinase At5g18500 [Oryza sativa Japonica Group]|BAB21240.1 receptor protein kinase PERK1-like protein [Oryza sativa Japonica Group]|BAF04808.1 Os01g0323000 [Oryza sativa Japonica Group]|EEE54448.1 hypothetical protein OsJ_01535 [Oryza sativa Japonica Group]|BAS71855.1 Os01g0323000 [Oryza sativa Japonica Group]
LOC_Os01g21970.MSUv7.0	109	140	151	103	101	64	3.13699	4.17259	4.22007	3.27561	2.78822	1.95957	XP_015621698.1	pto-interacting protein 1 [Oryza sativa Japonica Group]|BAB21241.1 putative Pto kinase interactor 1 [Oryza sativa Japonica Group]|BAC65877.1 putative Pto kinase interactor 1 [Oryza sativa Japonica Group]|BAF04809.1 Os01g0323100 [Oryza sativa Japonica Group]|EAZ11675.1 hypothetical protein OsJ_01536 [Oryza sativa Japonica Group]|BAG89427.1 unnamed protein product [Oryza sativa Japonica Group]|AFI7…
LOC_Os01g21990.MSUv7.0	66	64	91	23	67	42	1.64197	1.64889	2.19846	0.632292	1.59887	1.11164	XP_015622825.1	CRS2-associated factor 2, chloroplastic [Oryza sativa Japonica Group]|Q657G7.1 RecName: Full=CRS2-associated factor 2, chloroplastic; AltName: Full=Chloroplastic group IIA intron splicing facilitator CRS2-associated factor 2; Flags: Precursor|BAD44991.1 putative CRS2-associated factor 2 [Oryza sativa Japonica Group]|BAD45045.1 putative CRS2-associated factor 2 [Oryza sativa Japonica Group]|BAF048…
LOC_Os01g22000.MSUv7.0	0	3	5	4	0	1	0	0.100575	0.157183	0.143089	0	0.0344408	BAD44992.1	unknown protein [Oryza sativa Japonica Group]|BAD45046.1 unknown protein [Oryza sativa Japonica Group]|EAY73775.1 hypothetical protein OsI_01648 [Oryza sativa Indica Group]|BAG98102.1 unnamed protein product [Oryza sativa Japonica Group]|BAH91036.1 Os01g0323400 [Oryza sativa Japonica Group]|BAS71860.1 Os01g0323500 [Oryza sativa Japonica Group]
LOC_Os01g22010.MSUv7.0	13742	14379	16384	10440	8034	8054	326.899	354.228	378.476	274.43	183.321	203.83	XP_015613529.1	S-adenosylmethionine synthase 2 [Oryza sativa Japonica Group]|XP_015613535.1 S-adenosylmethionine synthase 2 [Oryza sativa Japonica Group]|XP_015613541.1 S-adenosylmethionine synthase 2 [Oryza sativa Japonica Group]|P93438.1 RecName: Full=S-adenosylmethionine synthase 2; Short=AdoMet synthase 2; AltName: Full=Methionine adenosyltransferase 2; Short=MAT 2|AAC05590.1 S-adenosyl-L-methionine synthet…
LOC_Os01g22080.MSUv7.0	0	6	2	7	3	7	0	0.399818	0.12497	0.497722	0.185165	0.479195	AAV32162.1	unknown protein [Oryza sativa Japonica Group]
LOC_Os01g22090.MSUv7.0	55	15	63	70	75	37	1.03413	0.292075	1.15029	1.45438	1.35267	0.74013	BAG95750.1	unnamed protein product [Oryza sativa Japonica Group]|EEC70536.1 hypothetical protein OsI_01669 [Oryza sativa Indica Group]
LOC_Os01g22200.MSUv7.0	0	0	0	0	1	0	0	0	0	0	0.0374492	0	BAD81939.1	hydroxyproline-rich glycoprotein-like [Oryza sativa Japonica Group]
LOC_Os01g22220.MSUv7.0	1	1	0	0	0	0	0.199694	0.206803	0	0	0	0	BAS71871.1	Os01g0325750 [Oryza sativa Japonica Group]
LOC_Os01g22230.MSUv7.0	39	34	32	32	38	25	1.35603	1.22426	1.08046	1.22948	1.26738	0.924778	BAD45695.1	putative peroxidase [Oryza sativa Japonica Group]|BAS71874.1 Os01g0326000 [Oryza sativa Japonica Group]
LOC_Os01g22249.MSUv7.0	1	0	0	0	0	0	0.0374158	0	0	0	0	0	BAS71877.1	Os01g0326300, partial [Oryza sativa Japonica Group]
LOC_Os01g22336.MSUv7.0	47	49	57	47	15	45	2.164	2.33639	2.54853	2.39125	0.662473	2.20427	XP_015624317.1	peroxidase 1 isoform X1 [Oryza sativa Japonica Group]|CAH69257.1 TPA: class III peroxidase 14 precursor [Oryza sativa Japonica Group]
LOC_Os01g22352.MSUv7.0	35	40	39	25	19	46	1.2243	1.44901	1.32477	0.966334	0.637516	1.71187	XP_015642920.1	peroxidase 1 isoform X2 [Oryza sativa Japonica Group]|CAH69258.1 TPA: class III peroxidase 15 precursor [Oryza sativa Japonica Group]|BAF04821.1 Os01g0327100 [Oryza sativa Japonica Group]|BAG92105.1 unnamed protein product [Oryza sativa Japonica Group]|BAS71879.1 Os01g0327100 [Oryza sativa Japonica Group]
LOC_Os01g22370.MSUv7.0	1372	1565	1401	763	482	859	51.2976	60.5966	50.867	31.5236	17.2865	34.1688	XP_015621829.1	peroxidase 1 [Oryza sativa Japonica Group]|BAB39281.1 putative peroxidase [Oryza sativa Japonica Group]|BAD45706.1 putative peroxidase [Oryza sativa Japonica Group]|CAH74220.1 TPA: class III peroxidase 16 precursor [Oryza sativa Japonica Group]|BAF04822.1 Os01g0327400 [Oryza sativa Japonica Group]|EAZ11690.1 hypothetical protein OsJ_01551 [Oryza sativa Japonica Group]|BAS71882.1 Os01g0327400 [Ory…
LOC_Os01g22380.MSUv7.0	1	0	0	0	0	3	0.0715936	0	0	0	0	0.228502	XP_015645899.1	uncharacterized protein LOC4326971 [Oryza sativa Japonica Group]|BAB39282.1 unknown protein [Oryza sativa Japonica Group]|BAD45707.1 unknown protein [Oryza sativa Japonica Group]|BAF04823.1 Os01g0327500 [Oryza sativa Japonica Group]|EAY73803.1 hypothetical protein OsI_01680 [Oryza sativa Indica Group]|EAZ11691.1 hypothetical protein OsJ_01552 [Oryza sativa Japonica Group]|BAG98150.1 unnamed prote…
LOC_Os01g22390.MSUv7.0	566	476	575	437	530	489	5.29433	4.61097	5.22297	4.51694	4.75541	4.86628	BAS71884.1	Os01g0327600 [Oryza sativa Japonica Group]
LOC_Os01g22430.MSUv7.0	270	296	323	197	379	311	10.242	11.6279	11.8981	8.25759	13.7904	12.5508	BAD52619.1	hypothetical protein [Oryza sativa Japonica Group]
LOC_Os01g22480.MSUv7.0	151	143	134	100	169	158	2.01128	1.97253	1.73323	1.47185	2.15924	2.23896	XP_015622263.1	F-box protein SKIP23 isoform X1 [Oryza sativa Japonica Group]|BAG95400.1 unnamed protein product [Oryza sativa Japonica Group]|BAS71892.1 Os01g0328300 [Oryza sativa Japonica Group]
LOC_Os01g22490.MSUv7.0	2505	2669	3688	2382	2263	2172	145.878	160.961	208.559	153.282	126.411	134.566	XP_020185819.1	ubiquitin-40S ribosomal protein S27a-like [Aegilops tauschii subsp. tauschii]
LOC_Os01g22500.MSUv7.0	454	454	477	405	475	419	19.3638	20.0531	19.7564	19.0879	19.4333	19.0126	XP_015611030.1	craniofacial development protein 1 [Oryza sativa Japonica Group]|BAF04830.1 Os01g0328500 [Oryza sativa Japonica Group]|BAS71894.1 Os01g0328500 [Oryza sativa Japonica Group]
LOC_Os01g22510.MSUv7.0	698	754	801	528	684	553	32.1093	35.9201	35.7819	26.8397	30.1821	27.0642	BAS71895.1	Os01g0328600 [Oryza sativa Japonica Group]
LOC_Os01g22520.MSUv7.0	1005	902	1299	760	684	828	25.3414	23.5539	31.8075	21.1761	16.5439	22.2121	XP_015611017.1	dihydrolipoyl dehydrogenase 1, mitochondrial [Oryza sativa Japonica Group]|BAB39219.1 putative dihydrolipoamide dehydrogenase precursor [Oryza sativa Japonica Group]|BAF04832.1 Os01g0328700 [Oryza sativa Japonica Group]|EAZ11701.1 hypothetical protein OsJ_01561 [Oryza sativa Japonica Group]|BAS71896.1 Os01g0328700 [Oryza sativa Japonica Group]
LOC_Os01g22550.MSUv7.0	145	135	151	174	164	159	3.53481	3.40818	3.57462	4.68722	3.83495	4.12372	XP_015623946.1	hydroxyproline O-galactosyltransferase GALT3 [Oryza sativa Japonica Group]|BAD54705.1 putative UDP-Gal:betaGlcNAc beta 1,3-galactosyltransferase-I [Oryza sativa Japonica Group]|BAF04833.1 Os01g0328900 [Oryza sativa Japonica Group]|BAG94941.1 unnamed protein product [Oryza sativa Japonica Group]|BAS71898.1 Os01g0328900 [Oryza sativa Japonica Group]
LOC_Os01g22590.MSUv7.0	5	6	10	11	5	6	0.104617	0.130009	0.203183	0.254327	0.100351	0.13356	XP_015622255.1	polygalacturonase At1g48100 [Oryza sativa Japonica Group]|BAD54709.1 putative polygalacturonase PG2 [Oryza sativa Japonica Group]|BAF04835.1 Os01g0329300 [Oryza sativa Japonica Group]|BAS71901.1 Os01g0329300 [Oryza sativa Japonica Group]
LOC_Os01g22600.MSUv7.0	448	554	544	522	504	411	12.7178	16.2867	14.9964	16.3746	13.724	12.4128	EAY73825.1	hypothetical protein OsI_01701 [Oryza sativa Indica Group]
LOC_Os01g22630.MSUv7.0	357	408	358	309	420	329	5.32082	6.29739	5.18142	5.08905	6.00451	5.21674	XP_015622436.1	uncharacterized protein LOC4326985 [Oryza sativa Japonica Group]|XP_015622437.1 uncharacterized protein LOC4326985 [Oryza sativa Japonica Group]|BAD54713.1 RNA-binding protein-like [Oryza sativa Japonica Group]|BAF04837.1 Os01g0329800 [Oryza sativa Japonica Group]|BAS71905.1 Os01g0329800 [Oryza sativa Japonica Group]
LOC_Os01g22640.MSUv7.0	16	8	31	17	0	10	0.432982	0.224197	0.814641	0.508354	0	0.287901	XP_015628397.1	GDSL esterase/lipase At1g09390 [Oryza sativa Japonica Group]|BAD54714.1 putative early nodule-specific protein ENOD8 [Oryza sativa Japonica Group]|BAF04838.1 Os01g0329900 [Oryza sativa Japonica Group]|BAS71907.1 Os01g0329900 [Oryza sativa Japonica Group]
LOC_Os01g22660.MSUv7.0	19	6	17	18	6	9	0.270126	0.0883395	0.234702	0.282783	0.0818243	0.136129	BAG94628.1	unnamed protein product [Oryza sativa Japonica Group]
LOC_Os01g22670.MSUv7.0	14	24	22	17	25	1	0.39167	0.695336	0.597683	0.525545	0.670889	0.0297637	EAZ11713.1	hypothetical protein OsJ_01575 [Oryza sativa Japonica Group]|BAF04840.2 Os01g0330200 [Oryza sativa Japonica Group]
LOC_Os01g22680.MSUv7.0	3	5	1	7	13	2	0.133413	0.230271	0.043185	0.343989	0.554548	0.0946241	EAY73832.1	hypothetical protein OsI_01708 [Oryza sativa Indica Group]
LOC_Os01g22710.MSUv7.0	6	2	1	6	9	3	0.192325	0.0663905	0.0311272	0.212522	0.276723	0.102306	XP_015642419.1	organic cation/carnitine transporter 2 [Oryza sativa Japonica Group]|BAS71911.1 Os01g0330600 [Oryza sativa Japonica Group]
LOC_Os01g22780.MSUv7.0	28	24	39	40	50	45	0.912103	0.809632	1.23369	1.43984	1.56233	1.55952	EAY73836.1	hypothetical protein OsI_01712 [Oryza sativa Indica Group]|EAZ11717.1 hypothetical protein OsJ_01579 [Oryza sativa Japonica Group]
LOC_Os01g22870.MSUv7.0	413	430	460	413	328	373	19.4275	20.9472	21.0126	21.4676	14.7999	18.6667	XP_015623672.1	Golgi apparatus membrane protein-like protein ECHIDNA [Oryza sativa Japonica Group]|BAD54738.1 unknown protein [Oryza sativa Japonica Group]|BAF04844.1 Os01g0331900 [Oryza sativa Japonica Group]|BAG89202.1 unnamed protein product [Oryza sativa Japonica Group]|BAH00644.1 unnamed protein product [Oryza sativa Japonica Group]|EEC70556.1 hypothetical protein OsI_01714 [Oryza sativa Indica Group]|EEE5…
LOC_Os01g22900.MSUv7.0	1419	1606	1084	791	778	1289	27.301	31.9987	20.2526	16.8167	14.358	26.3842	XP_015621225.1	neutral/alkaline invertase 1, mitochondrial-like [Oryza sativa Japonica Group]|BAD54740.1 putative neutral invertase [Oryza sativa Japonica Group]|BAD53496.1 putative neutral invertase [Oryza sativa Japonica Group]|BAF04845.1 Os01g0332100 [Oryza sativa Japonica Group]|BAH00142.1 unnamed protein product [Oryza sativa Japonica Group]|BAS71918.1 Os01g0332100 [Oryza sativa Japonica Group]
LOC_Os01g22920.MSUv7.0	0	0	0	2	0	0	0	0	0	0.216925	0	0	XP_015637578.2	gibberellin 2-beta-dioxygenase 2-like [Oryza sativa Japonica Group]
LOC_Os01g22954.MSUv7.0	30	11	21	16	22	19	0.788107	0.299259	0.535721	0.464464	0.554376	0.53102	ABA98724.1	retrotransposon protein, putative, unclassified [Oryza sativa Japonica Group]
LOC_Os01g22980.MSUv7.0	160	195	196	44	49	31	3.7312	4.70927	4.43853	1.13383	1.09608	0.769101	BAS71925.1	Os01g0332800, partial [Oryza sativa Japonica Group]
LOC_Os01g22990.MSUv7.0	2653	2216	2700	2158	1800	1339	41.4368	35.8435	40.9514	37.2451	26.9674	22.2497	BAS71926.1	Os01g0332900 [Oryza sativa Japonica Group]
LOC_Os01g23000.MSUv7.0	6	16	10	15	7	12	0.537321	1.48386	0.869637	1.48437	0.60131	1.14329	BAD53502.1	glucosyltransferase-10-like protein [Oryza sativa Japonica Group]
LOC_Os01g23070.MSUv7.0	2	7	1	0	1	2	0.0509483	0.184667	0.0247375	0	0.0244353	0.054203	BAS71930.1	Os01g0333600 [Oryza sativa Japonica Group]
LOC_Os01g23370.MSUv7.0	10	35	3	3	3	19	0.237018	0.859091	0.0690489	0.0785723	0.0682055	0.479102	XP_025883085.1	uncharacterized protein LOC112939698 [Oryza sativa Japonica Group]
LOC_Os01g23380.MSUv7.0	478	474	416	403	454	384	8.62653	8.85885	7.2905	8.03677	7.85927	7.37281	XP_015622431.1	disease resistance protein Pik-2-like [Oryza sativa Japonica Group]|BAB64601.1 putative stripe rust resistance protein Yr10 [Oryza sativa Japonica Group]|BAF04850.1 Os01g0335700 [Oryza sativa Japonica Group]|BAG90798.1 unnamed protein product [Oryza sativa Japonica Group]|BAS71937.1 Os01g0335700 [Oryza sativa Japonica Group]
LOC_Os01g23440.MSUv7.0	0	11	0	0	0	1	0	0.263178	0	0	0	0.0245788	XP_015637599.1	uncharacterized protein LOC9268353 [Oryza sativa Japonica Group]|BAD53921.1 unknown protein [Oryza sativa Japonica Group]|BAD52784.1 unknown protein [Oryza sativa Japonica Group]
LOC_Os01g23520.MSUv7.0	2	1	0	3	0	1	0.3278	0.169734	0	0.543335	0	0.17437	BAD44854.1	hypothetical protein [Oryza sativa Japonica Group]|BAD44893.1 hypothetical protein [Oryza sativa Japonica Group]
LOC_Os01g23530.MSUv7.0	3	0	0	0	0	0	0.0951098	0	0	0	0	0	EEE54487.1	hypothetical protein OsJ_01601 [Oryza sativa Japonica Group]
LOC_Os01g23580.MSUv7.0	82	131	136	49	29	183	1.57127	2.59955	2.53064	1.03753	0.533031	3.73062	EAZ11737.1	hypothetical protein OsJ_01602 [Oryza sativa Japonica Group]
LOC_Os01g23590.MSUv7.0	2157	1961	1931	1746	2288	2073	30.7419	28.9434	26.725	27.4975	31.2791	31.4321	EEC70567.1	hypothetical protein OsI_01742 [Oryza sativa Indica Group]
LOC_Os01g23600.MSUv7.0	621	633	439	543	984	715	18.6015	19.6359	12.7696	17.9731	28.2728	22.7854	BAF04854.1	Os01g0337700 [Oryza sativa Japonica Group]|EAY73865.1 hypothetical protein OsI_01743 [Oryza sativa Indica Group]|EAZ11739.1 hypothetical protein OsJ_01604 [Oryza sativa Japonica Group]|BAG97687.1 unnamed protein product [Oryza sativa Japonica Group]|BAG97886.1 unnamed protein product [Oryza sativa Japonica Group]|BAS71951.1 Os01g0337700 [Oryza sativa Japonica Group]|BAS71952.1 Os01g0337700, parti…
LOC_Os01g23610.MSUv7.0	352	399	433	387	347	395	7.64748	8.97716	9.13521	9.29083	7.23141	9.1299	AQK91496.1	dihydrolipoyl dehydrogenase [Zea mays]
LOC_Os01g23620.MSUv7.0	1598	1758	1704	1080	1030	1023	66.3121	75.5485	68.6659	49.5231	40.9988	45.1633	RXH80162.1	hypothetical protein DVH24_041309 [Malus domestica]
LOC_Os01g23630.MSUv7.0	255	338	337	320	255	239	16.9307	23.2404	21.7281	23.4776	16.2403	16.8821	BAH91046.1	Os01g0338100, partial [Oryza sativa Japonica Group]
LOC_Os01g23640.MSUv7.0	1606	1752	1632	883	981	1001	29.6931	33.5456	29.3012	18.0401	17.3979	19.6897	EEC70568.1	hypothetical protein OsI_01747 [Oryza sativa Indica Group]
LOC_Os01g23680.MSUv7.0	691	684	748	474	535	522	19.584	20.0757	20.5864	14.8447	14.5444	15.7394	XP_015622030.1	uncharacterized protein LOC4326799 isoform X1 [Oryza sativa Japonica Group]|BAD53130.1 cyanobacteria-specific protein-like [Oryza sativa Japonica Group]|BAF04858.1 Os01g0338600 [Oryza sativa Japonica Group]|EEE54491.1 hypothetical protein OsJ_01610 [Oryza sativa Japonica Group]|BAS71959.1 Os01g0338600 [Oryza sativa Japonica Group]
LOC_Os01g23710.MSUv7.0	362	395	352	484	714	616	8.95042	10.114	8.45149	13.2236	16.9337	16.2035	XP_015651177.1	NAC transcription factor NAM-B2 isoform X1 [Oryza sativa Japonica Group]
LOC_Os01g23740.MSUv7.0	1778	1949	2113	1565	1500	1596	58.6146	66.539	67.6439	57.0107	47.4333	55.9758	XP_015622515.1	protein disulfide isomerase-like 2-2 [Oryza sativa Japonica Group]|Q942L2.1 RecName: Full=Protein disulfide isomerase-like 2-2; Short=OsPDIL2-2; AltName: Full=Protein disulfide isomerase-like 4-2; Short=OsPDIL4-2; Flags: Precursor|BAB67990.1 putative protein disulfide-isomerase TIGA precursor [Oryza sativa Japonica Group]|BAF04863.1 Os01g0339900 [Oryza sativa Japonica Group]|EAY73875.1 hypothetic…
LOC_Os01g23750.MSUv7.0	0	0	0	0	0	1	0	0	0	0	0	0.0454134	EAY73876.1	hypothetical protein OsI_01756 [Oryza sativa Indica Group]
LOC_Os01g23800.MSUv7.0	0	0	1	0	0	0	0	0	0.114768	0	0	0	EEE54499.1	hypothetical protein OsJ_01626 [Oryza sativa Japonica Group]
LOC_Os01g23810.MSUv7.0	1	2	2	0	0	3	0.0616077	0.127602	0.119652	0	0	0.19663	BAD53199.1	hypothetical protein [Oryza sativa Japonica Group]|BAD53140.1 hypothetical protein [Oryza sativa Japonica Group]|BAF04864.1 Os01g0340600 [Oryza sativa Japonica Group]|BAS71971.1 Os01g0340600 [Oryza sativa Japonica Group]
LOC_Os01g23840.MSUv7.0	0	1	2	0	0	1	0	0.0844686	0.158413	0	0	0.0867758	EEC80397.1	hypothetical protein OsI_22533 [Oryza sativa Indica Group]
LOC_Os01g23850.MSUv7.0	97	75	170	92	49	65	2.67495	2.14188	4.55248	2.80349	1.29616	1.907	XP_015630491.1	uncharacterized protein LOC4326808 [Oryza sativa Japonica Group]|BAF04865.1 Os01g0341000 [Oryza sativa Japonica Group]|EAZ11764.1 hypothetical protein OsJ_01632 [Oryza sativa Japonica Group]
LOC_Os01g23870.MSUv7.0	207	195	357	227	154	155	6.36136	6.20591	10.6538	7.70857	4.53961	5.06763	XP_015631151.1	uncharacterized protein LOC4326809 [Oryza sativa Japonica Group]|BAD53208.1 unknown protein [Oryza sativa Japonica Group]|BAF04866.1 Os01g0341200 [Oryza sativa Japonica Group]|BAG91173.1 unnamed protein product [Oryza sativa Japonica Group]|BAH00683.1 unnamed protein product [Oryza sativa Japonica Group]|BAS71975.1 Os01g0341200 [Oryza sativa Japonica Group]
LOC_Os01g23880.MSUv7.0	3	3	10	11	5	2	0.130192	0.134826	0.421423	0.527501	0.208138	0.0923392	XP_015643816.2	uncharacterized protein LOC4326810 [Oryza sativa Japonica Group]
LOC_Os01g23910.MSUv7.0	1702	1555	1678	1436	1688	1423	192.01	181.671	183.828	179.014	182.664	170.79	EAY83271.1	hypothetical protein OsI_38478 [Oryza sativa Indica Group]
LOC_Os01g23970.MSUv7.0	8	13	21	4	1	4	0.326516	0.549476	0.832318	0.180403	0.0391501	0.173687	XP_015641523.1	cysteine-rich receptor-like protein kinase 15 [Oryza sativa Japonica Group]
LOC_Os01g23990.MSUv7.0	0	1	0	1	0	0	0	0.095363	0	0.101755	0	0	BAS71979.1	Os01g0342500, partial [Oryza sativa Japonica Group]
LOC_Os01g24010.MSUv7.0	213	111	132	29	48	275	2.42393	1.30814	1.45871	0.364675	0.523961	3.3294	XP_015622300.1	ABC transporter G family member 32 isoform X1 [Oryza sativa Japonica Group]|Q8LQX2.1 RecName: Full=ABC transporter G family member 32; Short=OsABCG32; AltName: Full=Pleiotropic drug resistance protein 16; Short=OsPDR16|BAB93292.1 putative ABC1 protein [Oryza sativa Japonica Group]|AAQ01165.1 putative ATPase [Oryza sativa Japonica Group]|BAF04869.1 Os01g0342700 [Oryza sativa Japonica Group]
LOC_Os01g24020.MSUv7.0	41	24	60	49	54	27	3.19421	1.93634	4.53927	4.21836	4.03544	2.23788	XP_015622300.1	ABC transporter G family member 32 isoform X1 [Oryza sativa Japonica Group]|Q8LQX2.1 RecName: Full=ABC transporter G family member 32; Short=OsABCG32; AltName: Full=Pleiotropic drug resistance protein 16; Short=OsPDR16|BAB93292.1 putative ABC1 protein [Oryza sativa Japonica Group]|AAQ01165.1 putative ATPase [Oryza sativa Japonica Group]|BAF04869.1 Os01g0342700 [Oryza sativa Japonica Group]
LOC_Os01g24050.MSUv7.0	28	9	4	9	7	6	0.582348	0.193846	0.0807867	0.20684	0.13965	0.132761	XP_015635901.1	uncharacterized protein LOC9269304 [Oryza sativa Japonica Group]|BAH00909.1 unnamed protein product [Oryza sativa Japonica Group]|BAH91051.1 Os01g0343100 [Oryza sativa Japonica Group]|BAS71985.1 Os01g0343100 [Oryza sativa Japonica Group]
LOC_Os01g24060.MSUv7.0	568	597	589	493	674	547	13.2814	14.4564	13.3742	12.7383	15.1173	13.6074	XP_015621362.1	importin subunit alpha-1b-like isoform X1 [Oryza sativa Japonica Group]|BAD53088.1 putative importin alpha 1b [Oryza sativa Japonica Group]|BAF04872.1 Os01g0343200 [Oryza sativa Japonica Group]|BAG94429.1 unnamed protein product [Oryza sativa Japonica Group]|BAS71986.1 Os01g0343200 [Oryza sativa Japonica Group]
LOC_Os01g24070.MSUv7.0	1873	1698	1278	1408	845	1014	69.1857	64.9542	45.8421	57.4711	29.9401	39.8483	BAS71989.1	Os01g0343350, partial [Oryza sativa Japonica Group]
LOC_Os01g24080.MSUv7.0	0	0	0	1	0	2	0	0	0	0.0218405	0	0.0420551	EAY73906.1	hypothetical protein OsI_01792 [Oryza sativa Indica Group]
LOC_Os01g24090.MSUv7.0	6	0	6	7	5	2	0.202934	0	0.197065	0.261619	0.162215	0.0719659	EEC70586.1	hypothetical protein OsI_01794 [Oryza sativa Indica Group]
LOC_Os01g24340.MSUv7.0	0	7	0	0	18	0	0	0.264031	0	0	0.628864	0	XP_015640588.1	uncharacterized protein LOC107281144 [Oryza sativa Japonica Group]|BAD52731.1 hypothetical protein [Oryza sativa Japonica Group]|BAD53194.1 hypothetical protein [Oryza sativa Japonica Group]
LOC_Os01g24420.MSUv7.0	34	49	40	61	35	31	0.745513	1.11266	0.85171	1.478	0.736143	0.723156	BAS72000.1	Os01g0346250 [Oryza sativa Japonica Group]
LOC_Os01g24430.MSUv7.0	90	115	181	116	65	91	3.1932	4.22544	6.23617	4.54789	2.21215	3.43494	BAD52740.1	unknown protein [Oryza sativa Japonica Group]|BAF04877.1 Os01g0346600 [Oryza sativa Japonica Group]
LOC_Os01g24440.MSUv7.0	131	141	167	109	109	95	5.61954	6.26382	6.95667	5.16683	4.48512	4.33557	XP_015635462.1	uncharacterized protein LOC4326494 [Oryza sativa Japonica Group]|BAD52741.1 unknown protein [Oryza sativa Japonica Group]|BAF04878.1 Os01g0346700 [Oryza sativa Japonica Group]|EAZ11791.1 hypothetical protein OsJ_01664 [Oryza sativa Japonica Group]|BAS72002.1 Os01g0346700 [Oryza sativa Japonica Group]
LOC_Os01g24460.MSUv7.0	0	0	0	0	0	1	0	0	0	0	0	0.0389394	XP_015635732.1	uncharacterized protein LOC4326495 isoform X3 [Oryza sativa Japonica Group]|BAF04879.1 Os01g0346900 [Oryza sativa Japonica Group]
LOC_Os01g24470.MSUv7.0	82	36	41	37	31	46	1.2232	0.55613	0.593912	0.609891	0.44357	0.730019	XP_015636116.1	dual specificity protein phosphatase PHS1 isoform X1 [Oryza sativa Japonica Group]|BAD53939.1 putative PROPYZAMIDE-HTPERSENSITIVE 1 [Oryza sativa Japonica Group]|BAD52745.1 putative PROPYZAMIDE-HTPERSENSITIVE 1 [Oryza sativa Japonica Group]|BAF04880.1 Os01g0347000 [Oryza sativa Japonica Group]|EEE54520.1 hypothetical protein OsJ_01667 [Oryza sativa Japonica Group]|BAS72004.1 Os01g0347000 [Oryza s…
LOC_Os01g24480.MSUv7.0	1496	1287	1489	1066	1444	1226	28.7506	25.6145	27.7886	22.6382	26.6196	25.0669	EAZ11795.1	hypothetical protein OsJ_01668 [Oryza sativa Japonica Group]
LOC_Os01g24490.MSUv7.0	153	187	230	91	115	113	3.78831	4.79497	5.53015	2.48979	2.7313	2.97664	XP_015628459.1	uncharacterized protein LOC4326498 [Oryza sativa Japonica Group]|BAD53941.1 unknown protein [Oryza sativa Japonica Group]|BAD52747.1 unknown protein [Oryza sativa Japonica Group]|BAF04882.1 Os01g0347200 [Oryza sativa Japonica Group]|BAG89977.1 unnamed protein product [Oryza sativa Japonica Group]|EEE54521.1 hypothetical protein OsJ_01669 [Oryza sativa Japonica Group]|BAS72006.1 Os01g0347200 [Oryz…
LOC_Os01g24500.MSUv7.0	120	148	117	209	99	88	4.65358	5.94373	4.40603	8.95613	3.68264	3.63064	BAD53942.1	hypothetical protein [Oryza sativa Japonica Group]|BAD52748.1 hypothetical protein [Oryza sativa Japonica Group]|EAZ11797.1 hypothetical protein OsJ_01670 [Oryza sativa Japonica Group]
LOC_Os01g24530.MSUv7.0	0	0	1	0	0	0	0	0	0.0328869	0	0	0	AAL25171.1	Putative TNP-like transposable element [Oryza sativa]|AAM08427.1 Putative TNP-like transposable element [Oryza sativa]|AAP52075.1 transposon protein, putative, CACTA, En/Spm sub-class [Oryza sativa Japonica Group]
LOC_Os01g24550.MSUv7.0	98	132	168	51	37	44	3.80609	5.30906	6.33604	2.18873	1.37839	1.81802	XP_015631997.1	ervatamin-B [Oryza sativa Japonica Group]|XP_015634042.1 ervatamin-B [Oryza sativa Japonica Group]|BAB63883.1 putative SAG12 protein [Oryza sativa Japonica Group]|BAB63889.1 putative SAG12 protein [Oryza sativa Japonica Group]|BAB93394.1 putative SAG12 protein [Oryza sativa Japonica Group]|BAF04883.1 Os01g0347500 [Oryza sativa Japonica Group]|BAF04885.1 Os01g0348000 [Oryza sativa Japonica Group]|…
LOC_Os01g24560.MSUv7.0	312	287	219	137	87	112	11.6821	11.1286	7.9628	5.66833	3.12467	4.46147	BAF04884.2	Os01g0347600 [Oryza sativa Japonica Group]
LOC_Os01g24570.MSUv7.0	77	63	77	31	26	33	4.18047	3.54214	4.05957	1.85979	1.35402	1.90608	BAF04884.2	Os01g0347600 [Oryza sativa Japonica Group]
LOC_Os01g24590.MSUv7.0	5	1	7	1	0	2	0.529676	0.109706	0.720102	0.11706	0	0.225405	XP_015637644.1	uncharacterized protein LOC107280841 [Oryza sativa Japonica Group]
LOC_Os01g24600.MSUv7.0	233	341	338	111	74	119	9.54717	14.4698	13.449	5.02585	2.90849	5.18751	XP_015631997.1	ervatamin-B [Oryza sativa Japonica Group]|XP_015634042.1 ervatamin-B [Oryza sativa Japonica Group]|BAB63883.1 putative SAG12 protein [Oryza sativa Japonica Group]|BAB63889.1 putative SAG12 protein [Oryza sativa Japonica Group]|BAB93394.1 putative SAG12 protein [Oryza sativa Japonica Group]|BAF04883.1 Os01g0347500 [Oryza sativa Japonica Group]|BAF04885.1 Os01g0348000 [Oryza sativa Japonica Group]|…
LOC_Os01g24680.MSUv7.0	2239	2416	2392	1789	1893	2123	34.8141	38.9036	36.1175	30.7383	28.2339	35.1193	XP_006644156.1	PREDICTED: glyoxysomal fatty acid beta-oxidation multifunctional protein MFP-a-like [Oryza brachyantha]
LOC_Os01g24690.MSUv7.0	2247	2119	2644	2168	2696	1851	126.884	123.915	144.984	135.279	146.03	111.2	XP_015622490.1	60S ribosomal protein L23A [Oryza sativa Japonica Group]|3J61_X Chain X, Localization Of The Large Subunit Ribosomal Proteins Into A 5.5 A Cryo-em Map Of Triticum Aestivum Translating 80s Ribosome|BAB63895.1 putative 60S ribosomal protein L23A [Oryza sativa Japonica Group]|BAB93400.1 putative 60S ribosomal protein L23A [Oryza sativa Japonica Group]|BAF04888.1 Os01g0348700 [Oryza sativa Japonica G…
LOC_Os01g24710.MSUv7.0	1120	988	1302	2110	865	11455	41.7857	38.1731	47.1711	86.9881	30.9559	454.672	5XFH_A	Chain A, Crystal structure of Orysata lectin in complex with biantennary N-glycan|5XFH_B Chain B, Crystal structure of Orysata lectin in complex with biantennary N-glycan|AAB53810.1 salT gene product [Oryza sativa Japonica Group]
LOC_Os01g24730.MSUv7.0	0	0	0	0	1	0	0	0	0	0	0.0974555	0	BAS72020.1	Os01g0349200 [Oryza sativa Japonica Group]
LOC_Os01g24750.MSUv7.0	810	748	644	661	795	821	24.9955	23.9039	19.2982	22.5396	23.5321	26.9534	XP_015622219.1	serine/threonine-protein phosphatase PP1 [Oryza sativa Japonica Group]|BAF04892.1 Os01g0349400 [Oryza sativa Japonica Group]|BAG89288.1 unnamed protein product [Oryza sativa Japonica Group]|BAG94488.1 unnamed protein product [Oryza sativa Japonica Group]|BAG97080.1 unnamed protein product [Oryza sativa Japonica Group]|BAH00834.1 unnamed protein product [Oryza sativa Japonica Group]|EEE54525.1 hyp…
LOC_Os01g24780.MSUv7.0	5	7	2	0	4	1	0.144217	0.209091	0.0560187	0	0.110669	0.0306861	EAY73939.1	hypothetical protein OsI_01824 [Oryza sativa Indica Group]
LOC_Os01g24810.MSUv7.0	0	0	0	3	0	0	0	0	0	0.109702	0	0	EAY73941.1	hypothetical protein OsI_01826 [Oryza sativa Indica Group]
LOC_Os01g24820.MSUv7.0	0	1	0	0	0	0	0	0.0211668	0	0	0	0	EEC70596.1	hypothetical protein OsI_01827 [Oryza sativa Indica Group]
LOC_Os01g24870.MSUv7.0	0	0	1	0	0	0	0	0	0.034014	0	0	0	ABF96971.1	hypothetical protein LOC_Os03g33810 [Oryza sativa Japonica Group]
LOC_Os01g24880.MSUv7.0	398	442	540	599	508	474	8.90293	10.2391	11.73	14.8062	10.9001	11.2803	BAS72031.1	Os01g0350900, partial [Oryza sativa Japonica Group]
LOC_Os01g24890.MSUv7.0	0	0	0	0	0	3	0	0	0	0	0	0.0678699	AAX96367.1	transposon protein, putative, CACTA, En/Spm sub-class [Oryza sativa Japonica Group]|ABA91927.1 transposon protein, putative, CACTA, En/Spm sub-class [Oryza sativa Japonica Group]
LOC_Os01g24920.MSUv7.0	45	34	58	56	38	29	1.66577	1.30338	2.08491	2.29065	1.34929	1.14207	EEC70600.1	hypothetical protein OsI_01832 [Oryza sativa Indica Group]
LOC_Os01g24940.MSUv7.0	52	34	27	39	62	49	1.1652	0.788979	0.58751	0.965669	1.33262	1.16812	Q5Z8Q9.2	RecName: Full=Poly [ADP-ribose] polymerase 2-A; Short=PARP-2-A; AltName: Full=NAD(+) ADP-ribosyltransferase 2-A; Short=ADPRT-2-A; AltName: Full=Poly[ADP-ribose] synthase 2-A; AltName: Full=Protein ADP-ribosyltransferase PARP2
LOC_Os01g24950.MSUv7.0	748	607	732	657	659	731	10.3246	8.67667	9.81161	10.0209	8.72523	10.7346	XP_015621102.1	exocyst complex component SEC15B [Oryza sativa Japonica Group]|BAB89615.1 SEC15 (S. cerevisiae)-like protein [Oryza sativa Japonica Group]|BAB93424.1 SEC15 (S. cerevisiae)-like protein [Oryza sativa Japonica Group]|BAF04899.1 Os01g0351300 [Oryza sativa Japonica Group]|BAS72035.1 Os01g0351300 [Oryza sativa Japonica Group]
LOC_Os01g24980.MSUv7.0	304	312	378	260	307	253	8.96184	9.52508	10.8211	8.46964	8.6812	7.93483	XP_015625087.1	protein SRG1 [Oryza sativa Japonica Group]|BAB89620.1 putative iron/ascorbate-dependent oxidoreductase [Oryza sativa Japonica Group]|BAD53294.1 putative iron/ascorbate-dependent oxidoreductase [Oryza sativa Japonica Group]|BAF04900.1 Os01g0351800 [Oryza sativa Japonica Group]|EAZ11820.1 hypothetical protein OsJ_01698 [Oryza sativa Japonica Group]|BAG93489.1 unnamed protein product [Oryza sativa J…
LOC_Os01g25010.MSUv7.0	0	0	0	0	0	2	0	0	0	0	0	0.0789882	EAY73954.1	hypothetical protein OsI_01838 [Oryza sativa Indica Group]
LOC_Os01g25030.MSUv7.0	0	0	0	5	0	16	0	0	0	0.564642	0	1.7396	EAY73955.1	hypothetical protein OsI_01839 [Oryza sativa Indica Group]
LOC_Os01g25060.MSUv7.0	10	6	11	9	12	8	0.212649	0.132131	0.227149	0.211482	0.244772	0.180986	BAF21376.2	Os07g0415600 [Oryza sativa Japonica Group]
LOC_Os01g25100.MSUv7.0	0	0	0	0	0	1	0	0	0	0	0	0.075751	XP_015645399.1	glutathione S-transferase 4 [Oryza sativa Japonica Group]|BAF04902.1 Os01g0353400 [Oryza sativa Japonica Group]|BAS72045.1 Os01g0353400 [Oryza sativa Japonica Group]
LOC_Os01g25120.MSUv7.0	0	1	0	0	1	0	0	0.0181919	0	0	0.0168502	0	BAD67783.1	hypothetical protein [Oryza sativa Japonica Group]
LOC_Os01g25189.MSUv7.0	308	280	315	175	199	233	8.03856	7.56792	7.9835	5.047	4.98194	6.4696	BAS72055.1	Os01g0354450, partial [Oryza sativa Japonica Group]
LOC_Os01g25240.MSUv7.0	10	7	21	11	19	19	0.442071	0.320465	0.901502	0.537344	0.805681	0.893592	XP_015628839.1	polynucleotide 5&apos;-hydroxyl-kinase NOL9 isoform X1 [Oryza sativa Japonica Group]|EEE54540.1 hypothetical protein OsJ_01710 [Oryza sativa Japonica Group]
LOC_Os01g25270.MSUv7.0	100	96	106	103	168	128	1.66465	1.65495	1.7135	1.89464	2.68256	2.26687	XP_015627306.1	pentatricopeptide repeat-containing protein At4g14850 [Oryza sativa Japonica Group]|XP_015627332.1 pentatricopeptide repeat-containing protein At4g14850 [Oryza sativa Japonica Group]|BAD52598.1 pentatricopeptide (PPR) repeat-containing protein-like [Oryza sativa Japonica Group]|BAH00928.1 unnamed protein product [Oryza sativa Japonica Group]|BAH91061.1 Os01g0355000 [Oryza sativa Japonica Group]|B…
LOC_Os01g25280.MSUv7.0	0	3	2	1	3	1	0	0.262017	0.163796	0.0931934	0.242693	0.0897244	XP_025881161.1	salt stress-induced protein-like isoform X1 [Oryza sativa Japonica Group]
LOC_Os01g25320.MSUv7.0	810	859	827	726	964	1086	12.1524	13.3463	12.0486	12.036	13.873	17.334	XP_015620958.1	auxilin-related protein 1 isoform X2 [Oryza sativa Japonica Group]
LOC_Os01g25330.MSUv7.0	1426	1461	1507	1444	1674	1574	17.9655	19.0617	18.4369	20.1027	20.2299	21.0969	BAF04911.1	Os01g0355600, partial [Oryza sativa Japonica Group]|BAS72063.1 Os01g0355600, partial [Oryza sativa Japonica Group]
LOC_Os01g25340.MSUv7.0	0	0	2	2	0	0	0	0	0.0871884	0.0992136	0	0	BAS72064.1	Os01g0355700, partial [Oryza sativa Japonica Group]
LOC_Os01g25370.MSUv7.0	963	926	987	1087	1270	1066	18.0222	17.9466	17.9371	22.4791	22.7983	21.2242	XP_015627521.1	ubiquitin-like-specific protease ESD4 [Oryza sativa Japonica Group]|BAB19414.1 putative SUMO protease [Oryza sativa Japonica Group]|BAB64088.1 putative SUMO protease [Oryza sativa Japonica Group]|EAZ11844.1 hypothetical protein OsJ_01720 [Oryza sativa Japonica Group]|BAH00251.1 unnamed protein product [Oryza sativa Japonica Group]|BAF04913.2 Os01g0355900 [Oryza sativa Japonica Group]|BAS72066.1 O…
LOC_Os01g25386.MSUv7.0	2589	2694	3561	2191	2803	2774	25.5566	27.5398	34.1349	23.8991	26.5407	29.1321	XP_015611347.1	ABC transporter C family member 4 [Oryza sativa Japonica Group]|CAD59596.1 MRP-like ABC transporter [Oryza sativa Japonica Group]|BAD52758.1 putative AtMRP4 [Oryza sativa Japonica Group]|BAH01190.1 unnamed protein product [Oryza sativa Japonica Group]|BAS72067.1 Os01g0356400 [Oryza sativa Japonica Group]
LOC_Os01g25440.MSUv7.0	166	157	229	124	143	109	5.16226	5.05617	6.91548	4.2611	4.26565	3.60622	EEE54547.1	hypothetical protein OsJ_01724 [Oryza sativa Japonica Group]
LOC_Os01g25460.MSUv7.0	0	2	1	0	0	0	0	0.0585417	0.0274473	0	0	0	XP_015636072.1	pollen-specific leucine-rich repeat extensin-like protein 4 [Oryza sativa Japonica Group]|BAC10720.1 putative leucine-rich repeat/extensin 1 [Oryza sativa Japonica Group]|BAF04920.1 Os01g0356900 [Oryza sativa Japonica Group]|EEE54548.1 hypothetical protein OsJ_01725 [Oryza sativa Japonica Group]|BAS72070.1 Os01g0356900 [Oryza sativa Japonica Group]
LOC_Os01g25484.MSUv7.0	7280	8119	16894	1659	1308	2418	127.67	147.452	287.703	32.1493	22.003	45.1135	XP_025881174.1	ferredoxin--nitrite reductase, chloroplastic isoform X1 [Oryza sativa Japonica Group]|BAD53072.1 putative ferredoxin--nitrite reductase, chloroplast precursor [Oryza sativa Japonica Group]|BAS72073.1 Os01g0357100 [Oryza sativa Japonica Group]
LOC_Os01g25500.MSUv7.0	43	72	163	10	13	24	3.90447	6.77044	14.3726	1.00337	1.13228	2.31845	EAZ11854.1	hypothetical protein OsJ_01728 [Oryza sativa Japonica Group]
LOC_Os01g25520.MSUv7.0	0	0	1	0	0	0	0	0	0.0860763	0	0	0	BAF04922.1	Os01g0357100 [Oryza sativa Japonica Group]|BAS72072.1 Os01g0357100 [Oryza sativa Japonica Group]
LOC_Os01g25530.MSUv7.0	3791	3460	3486	2196	4370	3152	46.3168	43.7776	41.3588	29.6473	51.2135	40.9699	XP_015641732.1	putative pentatricopeptide repeat-containing protein At3g01580 [Oryza sativa Japonica Group]|XP_015641740.1 putative pentatricopeptide repeat-containing protein At3g01580 [Oryza sativa Japonica Group]|XP_015641747.1 putative pentatricopeptide repeat-containing protein At3g01580 [Oryza sativa Japonica Group]|XP_015641752.1 putative pentatricopeptide repeat-containing protein At3g01580 [Oryza sativ…
LOC_Os01g25540.MSUv7.0	691	938	761	534	263	757	43.1318	60.6335	46.1274	36.8323	15.7468	50.27	XP_015641763.1	rapid alkalinization factor [Oryza sativa Japonica Group]|BAB63643.1 unknown protein [Oryza sativa Japonica Group]|BAC10726.1 unknown protein [Oryza sativa Japonica Group]|BAF04926.1 Os01g0357900 [Oryza sativa Japonica Group]|EAY73993.1 hypothetical protein OsI_01878 [Oryza sativa Indica Group]|BAG90647.1 unnamed protein product [Oryza sativa Japonica Group]|BAS72079.1 Os01g0357900 [Oryza sativa …
LOC_Os01g25550.MSUv7.0	13	13	18	4	2	2	3.32138	3.43961	4.46584	1.12928	0.490144	0.543625	EAZ11860.1	hypothetical protein OsJ_01734 [Oryza sativa Japonica Group]
LOC_Os01g25560.MSUv7.0	440	722	627	420	257	414	29.4767	50.0903	40.7896	31.0916	16.5149	29.5067	XP_015641773.1	protein RALF-like 33 [Oryza sativa Japonica Group]|BAB63645.1 unknown protein [Oryza sativa Japonica Group]|BAC10728.1 unknown protein [Oryza sativa Japonica Group]|BAF04927.1 Os01g0358100 [Oryza sativa Japonica Group]|EAY73995.1 hypothetical protein OsI_01879 [Oryza sativa Indica Group]|EAY73998.1 hypothetical protein OsI_01882 [Oryza sativa Indica Group]|EAZ11861.1 hypothetical protein OsJ_0173…
LOC_Os01g25600.MSUv7.0	39	32	56	19	27	32	0.763594	0.648841	1.06473	0.411073	0.507083	0.666563	XP_015625649.1	protein LOW PSII ACCUMULATION 1, chloroplastic [Oryza sativa Japonica Group]|BAD52962.1 unknown protein [Oryza sativa Japonica Group]|BAF04928.1 Os01g0358300 [Oryza sativa Japonica Group]|BAG87429.1 unnamed protein product [Oryza sativa Japonica Group]|EEC70624.1 hypothetical protein OsI_01883 [Oryza sativa Indica Group]|EEE54551.1 hypothetical protein OsJ_01736 [Oryza sativa Japonica Group]|BAS7…
LOC_Os01g25610.MSUv7.0	3308	3073	3656	3194	3525	2716	138.819	133.548	148.986	148.111	141.893	121.257	BAS72083.1	Os01g0358551 [Oryza sativa Japonica Group]
LOC_Os01g25630.MSUv7.0	213	128	183	106	174	145	3.50872	2.18358	2.92736	1.92949	2.74939	2.54115	EAZ11864.1	hypothetical protein OsJ_01738 [Oryza sativa Japonica Group]
LOC_Os01g25660.MSUv7.0	0	2	0	0	0	0	0	0.19039	0	0	0	0	BAS72086.1	Os01g0358800, partial [Oryza sativa Japonica Group]
LOC_Os01g25720.MSUv7.0	830	677	864	469	836	644	8.03935	6.79082	8.12665	5.01977	7.76724	6.63624	XP_015612833.1	putative disease resistance protein RGA3 [Oryza sativa Japonica Group]|BAD52972.1 powdery mildew resistance protein PM3b-like protein [Oryza sativa Japonica Group]|BAD53384.1 powdery mildew resistance protein PM3b-like protein [Oryza sativa Japonica Group]|BAF04931.1 Os01g0359400 [Oryza sativa Japonica Group]|BAG88744.1 unnamed protein product [Oryza sativa Japonica Group]|BAG89968.1 unnamed prot…
LOC_Os01g25740.MSUv7.0	1225	1025	1064	796	1203	909	14.5206	12.5824	12.2475	10.4263	13.6783	11.4632	XP_015612757.1	putative disease resistance protein RGA4 [Oryza sativa Japonica Group]|XP_015612789.1 putative disease resistance protein RGA4 [Oryza sativa Japonica Group]
LOC_Os01g25760.MSUv7.0	282	288	260	140	202	155	3.58572	3.79237	3.21038	1.96709	2.46375	2.09678	BAF04932.1	Os01g0359800 [Oryza sativa Japonica Group]|BAS72090.1 Os01g0359800 [Oryza sativa Japonica Group]
LOC_Os01g25770.MSUv7.0	5	5	8	4	3	5	0.539546	0.558752	0.838308	0.476965	0.310526	0.574014	BAS72091.1	Os01g0359900 [Oryza sativa Japonica Group]
LOC_Os01g25800.MSUv7.0	13	7	6	55	50	22	1.14068	0.636074	0.511241	5.33273	4.2083	2.05369	BAD52977.1	unknown protein [Oryza sativa Japonica Group]|BAD53389.1 unknown protein [Oryza sativa Japonica Group]|BAG88271.1 unnamed protein product [Oryza sativa Japonica Group]|BAH91063.1 Os01g0360150 [Oryza sativa Japonica Group]|BAS72092.1 Os01g0360150 [Oryza sativa Japonica Group]
LOC_Os01g25810.MSUv7.0	278	284	316	240	380	342	4.22185	4.4665	4.66016	4.02752	5.53554	5.52558	XP_025881222.1	putative disease resistance protein RGA4 isoform X1 [Oryza sativa Japonica Group]
LOC_Os01g25820.MSUv7.0	995	940	765	633	629	593	14.8297	14.5087	11.072	10.4251	8.99246	9.40282	XP_015620905.1	respiratory burst oxidase homolog protein B [Oryza sativa Japonica Group]|Q5ZAJ0.1 RecName: Full=Respiratory burst oxidase homolog protein B; AltName: Full=NADPH oxidase RBOHB; Short=OsrbohB|Q6J2K5.1 RecName: Full=Respiratory burst oxidase homolog protein B; AltName: Full=NADPH oxidase RBOHB; Short=OsrbohB|AAT35117.1 respiratory burst oxidase protein B [Oryza sativa Indica Group]|BAD53393.1 respi…
LOC_Os01g25880.MSUv7.0	518	482	474	481	614	472	23.9984	23.1255	21.3249	24.6244	27.286	23.2642	XP_015625124.1	dephospho-CoA kinase [Oryza sativa Japonica Group]|Q94DR2.1 RecName: Full=Dephospho-CoA kinase; AltName: Full=Dephosphocoenzyme A kinase|BAB61227.1 putative Dephospho-CoA kinase (27.4 kD) (3K840) [Oryza sativa Japonica Group]|BAF04935.1 Os01g0360600 [Oryza sativa Japonica Group]|BAG91389.1 unnamed protein product [Oryza sativa Japonica Group]|BAS72098.1 Os01g0360600 [Oryza sativa Japonica Group]
LOC_Os01g25920.MSUv7.0	0	0	1	0	0	0	0	0	0.0285304	0	0	0	BAS72100.1	Os01g0361000, partial [Oryza sativa Japonica Group]
LOC_Os01g25990.MSUv7.0	51	101	124	89	171	102	0.807206	1.65549	1.90586	1.55658	2.59614	1.71754	XP_015647430.1	acyltransferase-like protein At1g54570, chloroplastic isoform X2 [Oryza sativa Japonica Group]
LOC_Os01g26000.MSUv7.0	403	386	501	309	516	450	9.27757	9.20253	11.2001	7.8606	11.3945	11.0214	XP_015647469.1	acyltransferase-like protein At1g54570, chloroplastic isoform X1 [Oryza sativa Japonica Group]|BAD52913.1 esterase/lipase/thioesterase-like protein [Oryza sativa Japonica Group]|EAZ11876.1 hypothetical protein OsJ_01750 [Oryza sativa Japonica Group]
LOC_Os01g26020.MSUv7.0	258	240	276	231	216	247	13.5691	13.0718	14.096	13.4249	10.8969	13.8205	BAS72106.1	Os01g0362000, partial [Oryza sativa Japonica Group]
LOC_Os01g26039.MSUv7.0	85	45	140	85	56	96	1.74144	0.954755	2.7853	1.92431	1.10051	2.09244	EAY74017.1	hypothetical protein OsI_01905 [Oryza sativa Indica Group]
LOC_Os01g26120.MSUv7.0	39	62	92	28	43	38	1.8214	2.99864	4.17239	1.445	1.92632	1.88807	EAZ11885.1	hypothetical protein OsJ_01759 [Oryza sativa Japonica Group]
LOC_Os01g26130.MSUv7.0	0	82	0	0	402	0	0	2.45479	0	0	11.1469	0	BAS72117.1	Os01g0363500 [Oryza sativa Japonica Group]
LOC_Os01g26160.MSUv7.0	682	672	641	473	715	652	8.34412	8.51444	7.61569	6.39477	8.39112	8.48667	XP_015611572.1	protein HASTY 1 isoform X2 [Oryza sativa Japonica Group]
LOC_Os01g26174.MSUv7.0	83	71	78	55	89	74	1.98621	1.75953	1.81258	1.45438	2.04294	1.88397	BAB40010.1	putative wall-associated kinase 4 [Oryza sativa Japonica Group]|BAS72125.1 Os01g0364100 [Oryza sativa Japonica Group]
LOC_Os01g26270.MSUv7.0	7	21	3	4	15	2	0.341611	1.06132	0.142171	0.215706	0.702172	0.103838	BAD52639.1	putative wall-associated kinase 4 [Oryza sativa Japonica Group]|BAD53960.1 putative wall-associated kinase 4 [Oryza sativa Japonica Group]
LOC_Os01g26280.MSUv7.0	33	41	30	20	53	26	1.06236	1.36689	0.937854	0.71147	1.63664	0.890483	BAS72130.1	Os01g0364800, partial [Oryza sativa Japonica Group]
LOC_Os01g26290.MSUv7.0	2	1	0	0	0	0	0.225628	0.11683	0	0	0	0	BAD52640.1	unknown protein [Oryza sativa Japonica Group]|BAD53961.1 unknown protein [Oryza sativa Japonica Group]|EEE54568.1 hypothetical protein OsJ_01767 [Oryza sativa Japonica Group]|BAH91070.1 Os01g0364900 [Oryza sativa Japonica Group]|BAS72131.1 Os01g0364900 [Oryza sativa Japonica Group]
LOC_Os01g26300.MSUv7.0	6	15	3	9	7	6	0.239633	0.620408	0.116351	0.397197	0.268171	0.254941	EAZ11893.1	hypothetical protein OsJ_01768 [Oryza sativa Japonica Group]
LOC_Os01g26920.MSUv7.0	2	1	0	0	1	0	0.0735641	0.0380914	0	0	0.035282	0	XP_015616025.1	uncharacterized protein LOC4325727 [Oryza sativa Japonica Group]|BAD88331.1 unknown protein [Oryza sativa Japonica Group]|BAD89464.1 unknown protein [Oryza sativa Japonica Group]|BAD89466.1 unknown protein [Oryza sativa Japonica Group]|BAF04954.1 Os01g0367100 [Oryza sativa Japonica Group]|BAG99789.1 unnamed protein product [Oryza sativa Japonica Group]|BAS72141.1 Os01g0367100 [Oryza sativa Japoni…
LOC_Os01g26940.MSUv7.0	25	31	13	13	62	14	0.424155	0.544674	0.214182	0.243723	1.00901	0.2527	XP_015616045.1	serine/arginine repetitive matrix protein 5 isoform X2 [Oryza sativa Japonica Group]|BAD88333.1 peptidylprolyl cis-trans isomerase-like protein [Oryza sativa Japonica Group]|BAH91071.1 Os01g0367300 [Oryza sativa Japonica Group]|BAS72143.1 Os01g0367300 [Oryza sativa Japonica Group]
LOC_Os01g26970.MSUv7.0	0	7	4	7	9	9	0	0.175002	0.093771	0.186732	0.208408	0.231147	BAD88336.1	unknown protein [Oryza sativa Japonica Group]|BAD89470.1 unknown protein [Oryza sativa Japonica Group]|BAF04956.1 Os01g0367400 [Oryza sativa Japonica Group]|BAS72146.1 Os01g0367400 [Oryza sativa Japonica Group]
LOC_Os01g27020.MSUv7.0	70	39	31	34	110	186	1.21452	0.700747	0.522303	0.651857	1.8307	3.4333	XP_015621317.1	probable serine/threonine-protein kinase At1g54610 isoform X2 [Oryza sativa Japonica Group]|BAD89473.1 putative CRK1 protein [Oryza sativa Japonica Group]
LOC_Os01g27040.MSUv7.0	7	19	12	44	5	13	0.0972909	0.273476	0.161961	0.675764	0.0666595	0.192226	AAK53826.1	Putative SWI/SNF related, matrix associated, actin dependent regulator of chromatin [Oryza sativa]|BAB64747.1 putative DNA-dependent ATPase [Oryza sativa Japonica Group]
LOC_Os01g27050.MSUv7.0	0	0	0	1	0	1	0	0	0	0.0399123	0	0.0384267	BAD61442.1	flavin containing monooxygenase 4-like protein [Oryza sativa Japonica Group]|BAD88343.1 flavin containing monooxygenase 4-like protein [Oryza sativa Japonica Group]
LOC_Os01g27080.MSUv7.0	0	0	0	0	1	1	0	0	0	0	0.0151913	0.0168489	BAD61448.1	hydroxyproline-rich glycoprotein-like [Oryza sativa Japonica Group]|BAD88349.1 hydroxyproline-rich glycoprotein-like [Oryza sativa Japonica Group]
[truncated: 27,736 more rows]

## Sheet: Table S4 
Table S4. General information of DEGs
[truncated: 1,287 more rows]

## Sheet: Table S5 
Table S5. Results of qualitative and quantitative analysis of lipid molecules
[truncated: 3,543 more rows]

[truncated: 1 more sheets: Table S6]
